# Supplementary material for: Bioinformatics Analysis of the Human Surfaceome Reveals New Targets for a Variety of Tumor Types
Source: Int J Genomics. 2016 Nov 14;2016:8346198. doi: 10.1155/2016/8346198 (PMC5206789; doi:10.1155/2016/8346198)
Supplement: Supplementary file 1 — The supplementary material contains: (i) a list of all surfaceome gene with the corresponding S-score for all tumors used in this report (Supplementary Table 1); (ii) a list of three gene sets tested for differences in overall survival (Supplementary Table 2) and (iii) a heatmap, similar to Figure 2A, showing surfaceome genes identified using a more relaxed threshold. [file 8346198.f1.xlsx]

## Sheet: Surfaceome genes and S-score + Z-score
Table S1. Surfaceome genes and S-score + Z-score.
			S-score and Z-score
Geneid	Gene.Name	Description	sscoreBLCA	zscoreBLCA	BRCA	zscoreBRCA	sscoreCOADREAD	zscoreCOADREAD	sscoreGBM	zscoreGBM	sscoreHNSC	zscoreHNSC	sscoreKIRC	zscoreKIRC	sscoreLAML	zscoreLAML	sscoreLGG	zscoreLGG	sscoreLUAD	zscoreLUAD	sscoreLUSC	zscoreLUSC	sscoreOV	zscoreOV	sscorePRAD	zscorePRAD	sscoreSARC	zscoreSARC	sscoreSKCM	zscoreSKCM	sscoreUCEC	zscoreUCEC
127550	A3GALT2	alpha 1,3-galactosyltransferase 2	0	-0.539528	NA	NA	NA	NA	NA	NA	0	-0.532931	0	-0.40217	0	-0.968223	NA	NA	-2.32193	-1.7889	-0.785071	-0.608973	1.6499	0.685011	0	-0.468763	0	-1.34184	NA	NA	0.203964	-0.0474955
343066	AADACL4	arylacetamide deacetylase-like 4	0	-0.539528	0.783189	0.127383	0.278784	0.342653	-2.38975	-2.09223	1.26595	0.436845	1.28901	0.77655	0	-0.968223	1.49902	0.868873	0.144781	-0.207492	-1.53446	-1.11619	0.748405	0.117386	1.3622	0.754213	1.63823	0.362963	0.0441674	-0.0549698	0.967874	0.429898
132949	AASDH	aminoadipate-semialdehyde dehydrogenase	-1.88978	-1.8953	0.489546	-0.0773149	-2.20269	-1.12094	-0.348575	-0.286377	-0.743232	-1.10228	0	-0.40217	0	-0.968223	0.810966	0.203196	1.73674	0.813108	-1.49349	-1.08846	-1.74924	-1.45525	0.418713	-0.0928436	2.16179	0.907801	-1.78236	-1.14491	-2.43089	-1.69411
19	ABCA1	ATP-binding cassette, sub-family A (ABC1), member 1	1.12986	0.271061	-2.18791	-1.94377	1.17187	0.8694	-2.30855	-2.02039	2.09848	1.07461	0.910502	0.430425	1.53116	1.12913	0.962969	0.350255	-1.58077	-1.31374	-4.11042	-2.85971	-2.35967	-1.83961	1.96419	1.29468	2.22319	0.971696	-3.36082	-2.08682	-2.67531	-1.84685
10349	ABCA10	ATP-binding cassette, sub-family A (ABC1), member 10	1.57347	0.589315	0.821663	0.154203	0.532432	0.492256	0.765535	0.699288	1.13989	0.34028	1.71879	1.16956	0.209228	-0.681626	1.96297	1.31773	1.67722	0.774953	1.16746	0.712577	1.88673	0.834133	1.23954	0.644095	2.39312	1.14853	0.794728	0.39291	1.72301	0.901809
154664	ABCA13	ATP-binding cassette, sub-family A (ABC1), member 13	-4.10257	-3.48281	-2.62642	-2.24945	-3.68653	-1.99611	0.731865	0.6695	-2.34788	-2.33152	-1.87971	-2.12104	0.997028	0.39749	-0.510962	-1.07574	-3.3521	-2.44934	-2.31472	-1.6443	-1.29008	-1.16614	0.0374487	-0.435142	2.03055	0.771223	-1.85631	-1.18903	-2.16707	-1.52924
21	ABCA3	ATP-binding cassette, sub-family A (ABC1), member 3	0.864516	0.0806961	2.50188	1.32548	-0.992753	-0.407308	-1.20794	-1.04667	-2.47295	-2.42733	1.39632	0.874674	1.01658	0.424276	0.728504	0.123416	-2.12365	-1.66178	-2.35044	-1.66848	-1.5282	-1.31607	2.03877	1.36164	1.80816	0.539793	-2.72918	-1.7099	-1.61224	-1.1825
24	ABCA4	ATP-binding cassette, sub-family A (ABC1), member 4	-1.02857	-1.27745	1.57273	0.677772	-5.0025	-2.77228	-2.28276	-1.99757	-2.3493	-2.33261	-3.36204	-3.47654	0.77135	0.0883605	-2.40392	-2.90713	-1.35739	-1.17053	-0.445665	-0.37925	1.93263	0.863032	0.017702	-0.452871	1.33867	0.0512303	-5.22387	-3.19855	-1.89092	-1.35666
23460	ABCA6	ATP-binding cassette, sub-family A (ABC1), member 6	1.87832	0.808025	-1.24082	-1.28355	-4.21924	-2.31031	1.35902	1.22435	-2.24945	-2.25612	-2.65746	-2.83225	0.79419	0.119646	-0.980447	-1.52995	-2.79786	-2.09402	1.16746	0.712577	1.44672	0.55708	1.71684	1.07261	2.59243	1.35593	-0.573948	-0.423816	-3.24956	-2.20572
10347	ABCA7	ATP-binding cassette, sub-family A (ABC1), member 7	-3.82129	-3.28102	-1.59969	-1.53372	-3.09081	-1.64475	1.13824	1.02902	-1.76714	-1.88664	0.289013	-0.137886	1.37915	0.920918	0.0195528	-0.562476	-1.66395	-1.36707	-0.660993	-0.524993	-1.92461	-1.56567	1.41881	0.805038	2.09766	0.841064	0.699667	0.336185	-2.38515	-1.66552
10351	ABCA8	ATP-binding cassette, sub-family A (ABC1), member 8	0.0220569	-0.523704	-1.66388	-1.57846	-3.45529	-1.85973	0.204349	0.2028	0.260155	-0.33364	1.1749	0.672202	0	-0.968223	1.81097	1.17067	-2.40472	-1.84197	-0.878877	-0.672465	1.75251	0.749622	1.623	0.988362	2.63823	1.4036	-0.731756	-0.517984	-3.15712	-2.14795
5243	ABCB1	ATP-binding cassette, sub-family B (MDR/TAP), member 1	1.37353	0.445875	1.18768	0.409354	-3.46632	-1.86623	0.720874	0.659776	-0.310002	-0.770408	-1.74121	-1.99439	1.20923	0.688158	1.34148	0.716456	-2.38902	-1.83191	-1.23669	-0.914645	-0.829545	-0.876168	1.52262	0.898245	1.33867	0.0512303	-1.93566	-1.23639	-3.83236	-2.56993
23456	ABCB10	ATP-binding cassette, sub-family B (MDR/TAP), member 10	2.14707	1.00083	4.0952	2.43618	2.0547	1.3901	0.671636	0.616215	2.53517	1.40913	0.174447	-0.24265	1.77135	1.45814	0.226004	-0.36274	3.5124	1.95148	1.52419	0.954025	2.60388	1.28568	-0.147867	-0.601519	1.72569	0.45398	2.17279	1.21524	3.01422	1.70873
8647	ABCB11	ATP-binding cassette, sub-family B (MDR/TAP), member 11	1.5304	0.558416	-4.20144	-3.3474	-3.98671	-2.17316	0	0.0220105	0.829556	0.102548	0	-0.40217	0.209228	-0.681626	0.448396	-0.147581	-1.82323	-1.46918	0.362273	0.167595	1.20886	0.407312	0.198274	-0.290753	0.445587	-0.878145	-4.91504	-3.01427	-2.16156	-1.52579
5244	ABCB4	ATP-binding cassette, sub-family B (MDR/TAP), member 4	-0.8003	-1.11368	-2.21079	-1.95972	-3.00774	-1.59576	1.267	1.14294	-2.21608	-2.23056	0.291533	-0.135582	0.531156	-0.240654	1.1646	0.545331	-1.82049	-1.46742	1.7632	1.1158	0.55849	-0.00219352	1.96419	1.29468	1.63823	0.362963	-3.02184	-1.88454	-3.93268	-2.63262
340273	ABCB5	ATP-binding cassette, sub-family B (MDR/TAP), member 5	-1.01744	-1.26946	1.15658	0.387673	-3.20609	-1.71275	-1.29645	-1.12497	-1.61187	-1.7677	-2.37517	-2.57411	1.19213	0.66474	0.641041	0.0387982	-3.09772	-2.28625	-2.21497	-1.57679	0.930807	0.232235	0	-0.468763	2.16179	0.907801	-1.8826	-1.20472	-3.28947	-2.23066
10058	ABCB6	ATP-binding cassette, sub-family B (MDR/TAP), member 6	0.334001	-0.299908	-1.23975	-1.28281	-1.38543	-0.638911	0.566219	0.522951	-2.41977	-2.38659	0.943047	0.460186	1.37915	0.920918	0.810966	0.203196	2.13586	1.06899	-1.0162	-0.765408	0.57838	0.01033	1.47393	0.854529	1.80816	0.539793	0.816183	0.405713	-1.95158	-1.39457
23457	ABCB9	ATP-binding cassette, sub-family B (MDR/TAP), member 9	1.82941	0.772936	1.50368	0.629638	1.42562	1.01907	1.52585	1.37194	1.20128	0.387304	0.289013	-0.137886	1.01658	0.424276	1.64104	1.00627	1.35395	0.567702	0.698998	0.395504	1.20702	0.406154	1.47132	0.852187	1.44559	0.16249	0.865959	0.435415	1.55855	0.799033
4363	ABCC1	ATP-binding cassette, sub-family C (CFTR/MRP), member 1	-2.31161	-2.19793	0.208087	-0.27352	-0.948341	-0.381113	-3.22426	-2.83053	1.58903	0.684343	1.54312	1.00892	1.20923	0.688158	1.1646	0.545331	-1.00791	-0.946478	0.457571	0.232096	0.236701	-0.204807	1.6704	1.03092	1.44559	0.16249	-2.72675	-1.70845	-1.72915	-1.25556
89845	ABCC10	ATP-binding cassette, sub-family C (CFTR/MRP), member 10	2.14707	1.00083	2.38009	1.24058	2.2692	1.51661	-0.865779	-0.743954	1.62301	0.710371	1.11261	0.615241	1.20923	0.688158	1.10047	0.483287	2.64766	1.3971	0.36193	0.167363	1.87869	0.829066	0.625934	0.0931991	2.16179	0.907801	2.69098	1.52446	2.142	1.16365
85320	ABCC11	ATP-binding cassette, sub-family C (CFTR/MRP), member 11	-2.40583	-2.26552	0.818704	0.152141	-1.83332	-0.903082	1.2581	1.13506	1.72064	0.785163	0	-0.40217	1.53116	1.12913	0.962969	0.350255	-2.89944	-2.15914	-1.28629	-0.948219	-1.08042	-1.03413	1.29592	0.694711	0.223194	-1.10957	-2.36082	-1.49009	-3.84882	-2.58022
1244	ABCC2	ATP-binding cassette, sub-family C (CFTR/MRP), member 2	0	-0.539528	0.782899	0.127181	-3.49063	-1.88057	-0.116993	-0.0814943	0.00868224	-0.52628	0.980891	0.494792	1.01658	0.424276	1.1646	0.545331	1.88094	0.905558	2.49039	1.60799	0.78968	0.143375	1.07019	0.492054	1.63823	0.362963	-2.36082	-1.49009	-2.9664	-2.02876
8714	ABCC3	ATP-binding cassette, sub-family C (CFTR/MRP), member 3	-1.75413	-1.79798	2.8747	1.58537	0.631415	0.550637	-1.56622	-1.36364	1.49164	0.609736	-0.98117	-1.29939	1.01658	0.424276	-1.09592	-1.64167	1.78492	0.844002	1.57111	0.985783	1.25715	0.437715	1.23801	0.642718	1.54512	0.26607	-3.32193	-2.06361	1.44433	0.727652
10257	ABCC4	ATP-binding cassette, sub-family C (CFTR/MRP), member 4	-1.30701	-1.47721	1.21545	0.428712	2.81258	1.8371	0	0.0220105	1.06585	0.283561	-2.24934	-2.45905	1.01658	0.424276	0.341481	-0.251019	-2.07063	-1.62779	0.673719	0.378394	0.627163	0.0410464	-1.68805	-1.98429	1.72569	0.45398	-2.70986	-1.69837	-2.90445	-1.99005
10057	ABCC5	ATP-binding cassette, sub-family C (CFTR/MRP), member 5	-1.21534	-1.41144	-1.16071	-1.2277	-1.99277	-0.997123	-0.556302	-0.470156	1.51853	0.630335	1.17672	0.673865	1.37915	0.920918	1.4484	0.819893	2.27585	1.15873	5.70112	3.78114	4.04115	2.19066	1.9628	1.29343	1.44559	0.16249	-1.43683	-0.93872	0.993306	0.445791
368	ABCC6	ATP-binding cassette, sub-family C (CFTR/MRP), member 6	1.14136	0.279308	2.42922	1.27483	0	0.178225	-0.485427	-0.407452	1.32507	0.482138	-1.51885	-1.79106	1.20923	0.688158	0.728504	0.123416	-1.25403	-1.10427	0.660993	0.369781	1.71291	0.724684	-0.31974	-0.755825	1.72569	0.45398	-3.65472	-2.2622	-2.86031	-1.96247
6833	ABCC8	ATP-binding cassette, sub-family C (CFTR/MRP), member 8	0.141356	-0.438116	-0.46529	-0.742929	-3.61351	-1.95305	-2.44051	-2.13714	0	-0.532931	0	-0.40217	0.209228	-0.681626	1.2849	0.661713	-1.86183	-1.49393	-1.50429	-1.09577	0.698481	0.0859515	1.36149	0.753581	0.223194	-1.10957	-3.32193	-2.06361	1.65737	0.860786
10060	ABCC9	ATP-binding cassette, sub-family C (CFTR/MRP), member 9	1.78613	0.741883	1.27222	0.468285	1.04521	0.794693	-0.767999	-0.657447	-2.36501	-2.34464	-1.32716	-1.61578	0.531156	-0.240654	-1.37295	-1.90969	-0.7308	-0.768826	-0.607686	-0.488912	3.11245	1.6059	1.36149	0.753581	2.03055	0.771223	-2.78881	-1.74549	-2.86914	-1.96798
9619	ABCG1	ATP-binding cassette, sub-family G (WHITE), member 1	1.89879	0.822706	0.36068	-0.167148	0.719356	0.602505	-0.77267	-0.661579	0.852835	0.120382	0.758499	0.291428	2.32529	2.21692	-1.03703	-1.58469	-1.03052	-0.960974	-0.456024	-0.386261	0.215481	-0.218169	1.11136	0.529014	1.80816	0.539793	-2.5423	-1.59839	1.44433	0.727652
9429	ABCG2	ATP-binding cassette, sub-family G (WHITE), member 2	-2.27392	-2.17089	-2.78993	-2.36343	-2.69226	-1.40969	-2.43819	-2.13509	-1.95077	-2.02731	0.911048	0.430925	1.37915	0.920918	1.1646	0.545331	-1.46815	-1.24154	1.36296	0.844902	-0.308351	-0.547999	1.10968	0.527509	1.22319	-0.0689394	0.699667	0.336185	-1.67745	-1.22326
64137	ABCG4	ATP-binding cassette, sub-family G (WHITE), member 4	-1.70563	-1.76318	0.702865	0.0713896	0.636393	0.553573	1.26107	1.13769	-2.36358	-2.34355	0.289854	-0.137117	0.957105	0.342803	1.77032	1.13135	-1.4977	-1.26049	0.576541	0.31262	0.66973	0.0678484	1.10885	0.526756	0	-1.34184	1.34912	0.72373	1.79551	0.947117
64240	ABCG5	ATP-binding cassette, sub-family G (WHITE), member 5	0.556393	-0.140358	1.66033	0.738838	1.17187	0.8694	0	0.0220105	0.923731	0.174691	0.910502	0.430425	0	-0.968223	1.226	0.604734	-2.74816	-2.06215	1.15817	0.706291	2.11895	0.98035	1.17687	0.587833	0	-1.34184	-3.03153	-1.89032	2.08297	1.12676
64241	ABCG8	ATP-binding cassette, sub-family G (WHITE), member 8	0.687638	-0.0462003	1.21641	0.429384	-1.83052	-0.901428	-0.530515	-0.447342	-1.3982	-1.60402	0.289013	-0.137886	0.209228	-0.681626	1.226	0.604734	-1.43888	-1.22278	0.659162	0.368541	0.247928	-0.197739	1.30254	0.700654	0.808157	-0.500842	-3.0131	-1.87933	-0.728716	-0.630359
84696	ABHD1	abhydrolase domain containing 1	2.45409	1.2211	1.15781	0.388528	1.37832	0.991166	-0.0357041	-0.00957727	0.133568	-0.430612	0.910502	0.430425	0.79419	0.119646	-1.31642	-1.855	1.99074	0.975951	2.45126	1.5815	1.96446	0.88307	1.30181	0.699995	0.808157	-0.500842	1.36334	0.732218	2.327	1.27926
26090	ABHD12	abhydrolase domain containing 12	2.55209	1.2914	1.35412	0.52538	4.08167	2.58562	0.842755	0.767606	-0.356876	-0.806315	1.23243	0.724808	1.01658	0.424276	0.888969	0.278662	-0.11418	-0.373512	0.226597	0.075764	1.87867	0.829058	1.41745	0.803822	1.88616	0.620966	-0.553099	-0.411375	2.66269	1.48904
84945	ABHD13	abhydrolase domain containing 13	-0.067039	-0.587624	-1.34147	-1.35371	0.78359	0.640391	-1.56622	-1.36364	1.39767	0.537755	0.398269	-0.037979	1.53116	1.12913	0.125531	-0.459945	-1.11988	-1.01826	-0.842255	-0.647678	-0.842798	-0.884513	0.324795	-0.177163	0.436099	-0.888018	1.18733	0.627189	0.844221	0.352623
7920	ABHD16A	abhydrolase domain containing 16A	-0.622274	-0.985962	1.16462	0.393277	-0.808215	-0.298466	-0.874469	-0.751642	1.67592	0.750902	-0.612977	-0.962698	1.37915	0.920918	1.2849	0.661713	2.47927	1.28915	-0.108711	-0.151186	2.32564	1.11049	0.887991	0.328473	0.70044	-0.612936	2.61591	1.47966	2.20409	1.20245
171586	ABHD3	abhydrolase domain containing 3	2.12408	0.984336	-1.80202	-1.67476	-3.67502	-1.98933	0.0493207	0.0656451	2.16472	1.12535	0	-0.40217	0.531156	-0.240654	0.962969	0.350255	1.97703	0.967159	0.853904	0.500351	-0.663896	-0.771867	-1.01791	-1.38264	1.33867	0.0512303	0.799203	0.39558	-0.394661	-0.421597
79777	ACBD4	acyl-CoA binding domain containing 4	1.78613	0.741883	0.688082	0.0610838	1.11171	0.833921	-0.10579	-0.0715827	1.14304	0.342694	1.0485	0.556618	0.531156	-0.240654	0.728504	0.123416	1.75292	0.823485	0	-0.077606	-2.84005	-2.14208	0.539733	0.015808	0.638232	-0.677672	-0.699912	-0.498982	0.746453	0.291524
1636	ACE	angiotensin I converting enzyme	-1.55794	-1.65723	2.68894	1.45588	1.45743	1.03783	0.512133	0.475101	-1.83524	-1.93881	1.1749	0.672202	0.79419	0.119646	1.7285	1.09089	-1.64054	-1.35206	0.427938	0.21204	1.07989	0.326108	1.76024	1.11157	1.80816	0.539793	-2.61328	-1.64074	-0.782449	-0.663939
59272	ACE2	angiotensin I converting enzyme 2	-1.85185	-1.86809	-0.864776	-1.02141	-2.76724	-1.45391	0.61112	0.562675	0.289902	-0.310852	-1.90018	-2.13977	0.174831	-0.728742	0.226004	-0.36274	0.0274634	-0.282705	-1.31575	-0.968161	1.61929	0.66574	1.29739	0.696034	1.96016	0.697973	1.91613	1.06208	-2.04628	-1.45375
2532	ACKR1	atypical chemokine receptor 1 (Duffy blood group)	2.3977	1.18064	2.81712	1.54523	1.16155	0.863312	1.38934	1.25118	1.52313	0.63386	1.11309	0.615675	0	-0.968223	1.34148	0.716456	0.279236	-0.121293	1.96107	1.24973	2.11082	0.975228	0.523883	0.00157769	2.09766	0.841064	-0.677212	-0.485437	2.20162	1.20091
1238	ACKR2	atypical chemokine receptor 2	2.38808	1.17374	1.21738	0.430055	0.465847	0.452984	0.82199	0.749235	0	-0.532931	-2.43197	-2.62605	1.37915	0.920918	1.10047	0.483287	2.13938	1.07125	-1.0162	-0.765408	1.56185	0.629572	0	-0.468763	1.44559	0.16249	1.61233	0.880794	1.52412	0.777515
57007	ACKR3	atypical chemokine receptor 3	-0.671871	-1.02154	0.0331669	-0.395456	-2.36007	-1.21376	-1.34362	-1.1667	1.32784	0.484261	1.2941	0.781198	0.79419	0.119646	0.0703893	-0.513293	1.45676	0.633614	-0.0683987	-0.123901	0.884371	0.202997	0.625934	0.0931991	3.20343e-16	-1.34184	0.21424	0.0465173	2.22812	1.21747
51554	ACKR4	atypical chemokine receptor 4	1.26211	0.365938	NA	NA	NA	NA	NA	NA	2.12384	1.09403	1.1749	0.672202	1.37915	0.920918	NA	NA	0.870382	0.25769	2.40311	1.54892	1.71436	0.725601	1.92469	1.25922	0.445587	-0.878145	NA	NA	0.628738	0.21796
130013	ACMSD	aminocarboxymuconate semialdehyde decarboxylase	-2.35686	-2.2304	1.03292	0.301473	-2.28881	-1.17173	1.55289	1.39587	0.387194	-0.236322	0.758499	0.291428	1.53116	1.12913	0	-0.581393	0.266217	-0.12964	1.23097	0.755566	0.0741082	-0.307184	-1.35153	-1.68217	0.96016	-0.342662	-0.844653	-0.585354	-1.37233	-1.03258
52	ACP1	acid phosphatase 1, soluble	3.38082	1.88595	1.53061	0.648412	-1.53309	-0.726002	-0.286481	-0.231443	1.77422	0.826204	1.11214	0.614807	0.531156	-0.240654	1.03336	0.418355	2.51642	1.31296	1.12019	0.680581	1.50994	0.596887	1.52325	0.89881	-1.20163	-2.5923	1.53692	0.835797	-0.409018	-0.430569
55	ACPP	acid phosphatase, prostate	-0.279897	-0.740333	1.15769	0.38845	-2.72973	-1.43179	1.15278	1.04189	2.55277	1.42261	1.3971	0.875387	1.66866	1.31748	-1.2125	-1.75446	1.91643	0.928307	2.85549	1.8551	2.6744	1.33008	1.57155	0.942175	0.223194	-1.10957	-3.32193	-2.06361	1.76299	0.926794
93650	ACPT	acid phosphatase, testicular	2.01582	0.906673	1.12639	0.366627	0	0.178225	0.953242	0.865354	1.14304	0.342694	0	-0.40217	1.20923	0.688158	-0.810966	-1.36598	1.87884	0.904208	1.41788	0.882073	0.900393	0.213085	0.418129	-0.0933677	0	-1.34184	0.799203	0.39558	0.779343	0.312078
2180	ACSL1	acyl-CoA synthetase long-chain family member 1	-1.32436	-1.48966	-1.99476	-1.80912	-3.5639	-1.92379	1.11371	1.00732	0.161097	-0.409523	0.173536	-0.243483	1.37915	0.920918	0.523562	-0.07486	-2.17144	-1.69242	-2.31979	-1.64774	-3.06761	-2.28536	1.04009	0.465029	-0.137504	-1.48493	1.79381	0.989087	-2.0871	-1.47926
23305	ACSL6	acyl-CoA synthetase long-chain family member 6	0	-0.539528	1.76319	0.810543	0.793357	0.646151	-1.98768	-1.73651	-2.42845	-2.39324	3.41628	2.7218	0.820873	0.156195	1.1646	0.545331	-2.43399	-1.86074	0	-0.077606	1.2895	0.458084	0.888969	0.329351	1.22319	-0.0689394	-3.36082	-2.08682	1.01288	0.458024
90	ACVR1	activin A receptor, type I	1.59034	0.60142	-0.329775	-0.648463	1.22632	0.901514	0.639304	0.58761	1.8101	0.853694	1.11214	0.614807	0.79419	0.119646	0.888969	0.278662	1.39894	0.596547	-1.16467	-0.865905	0.959047	0.250017	-0.422943	-0.848481	1.72569	0.45398	-1.16827	-0.778462	0.984954	0.440572
91	ACVR1B	activin A receptor, type IB	1.80793	0.757526	-3.77642	-3.05111	-4.62185	-2.54777	1.26107	1.13769	-1.47049	-1.6594	1.98089	1.40923	1.37915	0.920918	0.962969	0.350255	-0.449428	-0.588439	0	-0.077606	1.41885	0.53953	1.23878	0.643407	1.80816	0.539793	-0.595918	-0.436926	1.71627	0.897595
130399	ACVR1C	activin A receptor, type IC	1.65593	0.648475	0.999502	0.278175	-2.44541	-1.26409	1.37426	1.23783	-1.15106	-1.41469	0.495464	0.0509001	1.37915	0.920918	1.59524	0.961959	0.945034	0.305549	-1.24642	-0.921236	-0.559652	-0.70623	-0.871267	-1.25098	1.44559	0.16249	-4.18904	-2.58104	1.73316	0.908148
92	ACVR2A	activin A receptor, type IIA	1.15276	0.28749	0.701417	0.07038	-4.10753	-2.24442	1.38934	1.25118	1.63649	0.720696	0.676037	0.216022	1.20923	0.688158	0.547932	-0.0512828	-0.844446	-0.841685	-2.11799	-1.51115	0.253242	-0.194393	-1.11902	-1.47342	1.80816	0.539793	-1.42962	-0.934417	-2.59373	-1.79587
93	ACVR2B	activin A receptor, type IIB	2.91562	1.55221	-1.63631	-1.55925	-1.09549	-0.467903	1.18655	1.07177	0	-0.532931	-1.14839	-1.4523	0.79419	0.119646	0.448396	-0.147581	1.41356	0.605919	0.68231	0.384209	1.17938	0.388749	1.30401	0.701971	1.22319	-0.0689394	0.753552	0.368339	1.77286	0.932961
94	ACVRL1	activin A receptor type II-like 1	-0.63429	-0.994583	0.702407	0.0710699	-1.41291	-0.655116	0.455941	0.425387	-2.18204	-2.20448	0.758499	0.291428	0.79419	0.119646	1.34148	0.716456	-2.99515	-2.2205	0.206259	0.0619983	-1.5424	-1.32502	1.23878	0.643407	2.39312	1.14853	-2.80257	-1.7537	1.38582	0.691088
102	ADAM10	ADAM metallopeptidase domain 10	1.14136	0.279308	0.526896	-0.0512784	-1.33854	-0.611256	-1.35172	-1.17387	0.931041	0.180291	0.588574	0.136043	1.01658	0.424276	-0.932886	-1.48394	1.35395	0.567702	0	-0.077606	-1.95785	-1.5866	0.717944	0.175805	2.22319	0.971696	1.0764	0.560993	0.733156	0.283214
4185	ADAM11	ADAM metallopeptidase domain 11	2.05282	0.933213	1.68156	0.753637	0.164995	0.27554	1.0357	0.93831	-1.24615	-1.48754	0.911048	0.430925	1.66866	1.31748	1.2849	0.661713	-2.04804	-1.61331	0.866297	0.508738	-0.522887	-0.683081	-0.0480287	-0.511883	0	-1.34184	-0.935662	-0.639661	0.699183	0.261983
8038	ADAM12	ADAM metallopeptidase domain 12	0.156119	-0.427524	0.670875	0.0490889	-3.00022	-1.59132	0	0.0220105	1.14304	0.342694	-0.768493	-1.10491	0.79419	0.119646	0.884523	0.27436	-0.914782	-0.886777	-2.67202	-1.88614	1.7378	0.740355	0.965118	0.397718	1.63823	0.362963	-1.3179	-0.867754	1.59596	0.82241
8751	ADAM15	ADAM metallopeptidase domain 15	2.75653	1.43807	3.83807	2.25694	1.32016	0.956862	0.597233	0.55039	2.03076	1.02273	1.28985	0.777318	0.79419	0.119646	1.68544	1.04922	3.67115	2.05326	2.15974	1.38419	2.5194	1.23249	1.7581	1.10965	2.80816	1.58043	2.48121	1.39928	2.77277	1.55784
6868	ADAM17	ADAM metallopeptidase domain 17	-0.0894982	-0.603736	0.934135	0.232607	-2.59375	-1.35159	-0.316728	-0.258203	1.77422	0.826204	-2.0917	-2.3149	1.53116	1.12913	1.12553	0.50753	2.23174	1.13045	2.7099	1.75656	1.75956	0.754058	0.358655	-0.146764	1.80816	0.539793	0.49847	0.216125	2.63956	1.47459
8749	ADAM18	ADAM metallopeptidase domain 18	0.154484	-0.428698	0.184682	-0.289835	-1.41149	-0.654279	1.152	1.0412	-0.876231	-1.20417	1.44693	0.920956	-2.32193	-4.14876	0.810966	0.203196	2.2903	1.168	0.158482	0.0296608	0.688289	0.0795342	-0.147302	-0.601011	1.63823	0.362963	-4.26195	-2.62455	-1.09331	-0.858207
8728	ADAM19	ADAM metallopeptidase domain 19	0.607019	-0.104038	-2.92682	-2.45886	-1.52984	-0.724083	0.566219	0.522951	-3.31325	-3.07104	3.41666	2.72215	-1.64081	-3.21577	0.810966	0.203196	-1.48079	-1.24964	-1.83666	-1.32073	0.488881	-0.0460226	0.964191	0.396885	1.63823	0.362963	-3.36082	-2.08682	-1.30749	-0.992056
2515	ADAM2	ADAM metallopeptidase domain 2	-0.107825	-0.616884	2.70899	1.46986	-1.96419	-0.980267	-1.2581	-1.09104	-0.737656	-1.09801	0	-0.40217	0	-0.968223	0	-0.581393	-1.8419	-1.48115	-1.03899	-0.780836	0.66803	0.066778	-1.82159	-2.10418	1.22319	-0.0689394	-4.3415	-2.67202	2.04828	1.10508
8748	ADAM20	ADAM metallopeptidase domain 20	1.40248	0.466645	0.493634	-0.0744651	0.719356	0.602505	0.865779	0.787975	1.76607	0.81996	0.677322	0.217197	0.209228	-0.681626	0.641041	0.0387982	1.29493	0.529864	1.10276	0.668787	0.190786	-0.233718	1.11052	0.528262	1.44559	0.16249	0	-0.0813257	1.07772	0.498546
8747	ADAM21	ADAM metallopeptidase domain 21	1.40248	0.466645	1.35509	0.526058	-3.86707	-2.1026	0.566219	0.522951	0.365776	-0.252729	0.676679	0.21661	0.79419	0.119646	0.641041	0.0387982	0.878836	0.263109	-1.33672	-0.982354	1.65958	0.691103	1.24184	0.646158	1.54512	0.26607	-2.52273	-1.5867	-0.822012	-0.688663
53616	ADAM22	ADAM metallopeptidase domain 22	1.52163	0.552124	1.09637	0.345699	-1.40694	-0.651598	1.89486	1.69842	-1.38565	-1.5944	-0.0591508	-0.45626	1.20923	0.688158	1.34148	0.716456	-2.0797	-1.6336	2.44423	1.57675	1.41236	0.535446	1.623	0.988362	1.72569	0.45398	1.25217	0.665878	-0.914904	-0.746714
8745	ADAM23	ADAM metallopeptidase domain 23	-2.05201	-2.01169	-2.2404	-1.98036	-2.46419	-1.27517	0.157245	0.161127	1.63649	0.720696	1.58994	1.05173	0	-0.968223	1.03336	0.418355	-3.30719	-2.42055	-1.94763	-1.39584	1.51948	0.602891	1.11136	0.529014	0	-1.34184	-0.970184	-0.660261	-3.96064	-2.6501
10863	ADAM28	ADAM metallopeptidase domain 28	-1.50779	-1.62126	-1.61575	-1.54491	-1.84531	-0.91015	-1.76206	-1.5369	-2.66277	-2.57274	-1.63566	-1.89787	1.79419	1.48943	1.54793	0.916192	-1.49341	-1.25773	-1.83788	-1.32156	-2.89426	-2.17621	-2.63941	-2.83842	1.33867	0.0512303	-3.34516	-2.07747	-3.26747	-2.21691
11086	ADAM29	ADAM metallopeptidase domain 29	-4.41603	-3.70769	-2.09102	-1.87622	-4.72383	-2.60792	-1.6843	-1.46811	-2.23326	-2.24371	-1.08325	-1.39273	1.01658	0.424276	0	-0.581393	-1.68959	-1.38351	-2.74543	-1.93582	-1.14043	-1.07192	-2.45049	-2.66881	-0.445587	-1.80553	-3.19629	-1.98864	-0.828308	-0.692598
11085	ADAM30	ADAM metallopeptidase domain 30	1.30363	0.395725	1.29893	0.486904	0.372364	0.397847	1.17035	1.05743	-0.195551	-0.682732	0	-0.40217	0	-0.968223	0	-0.581393	1.44542	0.626346	1.01254	0.607721	0.828784	0.167996	0.522624	0.000446962	2.09766	0.841064	2.21493	1.24038	1.50458	0.765305
203102	ADAM32	ADAM metallopeptidase domain 32	2.70571	1.40162	3.14021	1.77046	2.18062	1.46437	0.830075	0.756387	2.3495	1.2669	0.676679	0.21661	1.65625	1.30048	1.49902	0.868873	1.52047	0.674463	2.8759	1.86892	0.209268	-0.222081	0.15366	-0.330807	2.09766	0.841064	-2.13409	-1.3548	-0.0730751	-0.220627
8756	ADAM7	ADAM metallopeptidase domain 7	-1.50779	-1.62126	-1.52275	-1.48008	-3.75617	-2.03719	-2.6662	-2.33681	-1.24983	-1.49036	0	-0.40217	1.53116	1.12913	-2.34978	-2.85474	-2.95573	-2.19523	-1.92361	-1.37958	-2.15988	-1.71381	-2.41526	-2.63718	0	-1.34184	-3.48518	-2.16103	-2.60226	-1.8012
101	ADAM8	ADAM metallopeptidase domain 8	-1.99608	-1.97157	1.27345	0.469147	0.714657	0.599734	0.021411	0.040953	0.381869	-0.240401	0.588574	0.136043	1.63109	1.26602	0.436099	-0.159478	0.515061	0.0298937	-1.91889	-1.37639	0.698353	0.0858706	0.966045	0.39855	1.22239	-0.0697737	-0.298081	-0.259199	1.57738	0.810797
8754	ADAM9	ADAM metallopeptidase domain 9	-0.30126	-0.755659	3.21765	1.82444	-1.83214	-0.902382	-0.530515	-0.447342	2.86887	1.66476	0.589257	0.136667	1.78282	1.47385	1.4484	0.819893	-1.09193	-1.00035	2.15054	1.37797	-0.109884	-0.423035	-1.37038	-1.69909	2.44559	1.20313	1.55652	0.847493	-0.575974	-0.534906
11093	ADAMTS13	ADAM metallopeptidase with thrombospondin type 1 motif, 13	-0.914011	-1.19526	1.20445	0.421044	-1.17536	-0.515007	-1.84493	-1.61022	2.22657	1.17273	0.836501	0.362756	1.01658	0.424276	1.34148	0.716456	1.09459	0.401429	-1.80595	-1.29995	-0.912161	-0.928187	2.03745	1.36045	1.54512	0.26607	-2.16827	-1.37519	-1.29211	-0.982441
9507	ADAMTS4	ADAM metallopeptidase with thrombospondin type 1 motif, 4	3.3415	1.85774	3.25647	1.8515	1.36638	0.984127	0.566219	0.522951	1.41582	0.551656	1.28985	0.777318	0	-0.968223	1.226	0.604734	0.320048	-0.0951288	1.64112	1.03317	1.88189	0.83108	1.10968	0.527509	2.76751	1.53814	-0.176718	-0.186778	2.46263	1.36402
107	ADCY1	adenylate cyclase 1 (brain)	0.836501	0.0605979	1.59528	0.69349	0.700466	0.591364	0.63789	0.586359	1.84318	0.879034	0.758499	0.291428	0.997028	0.39749	1.77032	1.13135	-0.895928	-0.87469	0.594754	0.324948	-0.305168	-0.545994	1.47328	0.853944	1.80816	0.539793	-2.13113	-1.35303	1.31136	0.644556
55811	ADCY10	adenylate cyclase 10 (soluble)	2.74904	1.4327	3.19977	1.81197	0.983316	0.758191	0.932801	0.84727	2.37652	1.2876	1.049	0.557072	1.20923	0.688158	1.2849	0.661713	2.93805	1.58327	3.42111	2.23794	2.17677	1.01675	0.964191	0.396885	2.88616	1.6616	2.06748	1.1524	2.49269	1.38281
108	ADCY2	adenylate cyclase 2 (brain)	0.518105	-0.167827	1.96446	0.950845	-1.75022	-0.854068	-1.10786	-0.958128	-0.468341	-0.891703	-0.924439	-1.24751	1.01658	0.424276	1.2849	0.661713	-1.26588	-1.11187	3.85813	2.53373	3.04342	1.56244	0.964191	0.396885	2.49621	1.25581	1.69727	0.931483	1.76952	0.930873
109	ADCY3	adenylate cyclase 3	1.80793	0.757526	0.701948	0.0707502	1.05639	0.801291	-0.219982	-0.17261	-0.27489	-0.74351	1.17354	0.670953	1.66866	1.31748	0.547932	-0.0512828	-0.486024	-0.611901	-0.589336	-0.476492	-1.19139	-1.104	1.36149	0.753581	0.445587	-0.878145	1.44891	0.78328	-1.47723	-1.09813
196883	ADCY4	adenylate cyclase 4	1.28302	0.380939	0.931739	0.230937	0.171868	0.279594	0	0.0220105	-0.996972	-1.29666	0.289013	-0.137886	1.53116	1.12913	1.34148	0.716456	1.77137	0.835311	-0.348716	-0.313631	0.48785	-0.0466721	1.3629	0.754845	0.96016	-0.342662	0.908237	0.460644	-1.12266	-0.876549
111	ADCY5	adenylate cyclase 5	0.778786	0.0191914	1.06464	0.32358	-2.55336	-1.32776	1.33381	1.20205	2.10638	1.08066	0	-0.40217	0.531156	-0.240654	-2.22597	-2.73496	-0.117934	-0.375918	2.86553	1.8619	2.05534	0.940297	-0.935997	-1.3091	2.16179	0.907801	-3.10769	-1.93577	2.20409	1.20245
112	ADCY6	adenylate cyclase 6	-0.854071	-1.15226	0.999901	0.278453	1.05639	0.801291	0.201283	0.200087	1.20128	0.387304	0.980891	0.494792	1.79419	1.48943	0.447459	-0.148488	1.15526	0.440323	0.0541633	-0.040946	0.453822	-0.0680979	1.04009	0.465029	0	-1.34184	0.72451	0.351009	1.40702	0.704338
113	ADCY7	adenylate cyclase 7	1.46786	0.513547	0.616346	0.0110767	-1.21646	-0.539254	0.413436	0.387782	-0.764902	-1.11888	1.17354	0.670953	1.20923	0.688158	0.728504	0.123416	1.44826	0.628168	-0.686603	-0.542326	-1.96489	-1.59103	-0.1762	-0.626956	0.96016	-0.342662	-2.18445	-1.38484	-2.07427	-1.47124
114	ADCY8	adenylate cyclase 8 (brain)	2.8007	1.46976	3.33723	1.9078	-2.12709	-1.07635	-0.942118	-0.811492	-0.605765	-0.996976	1.63429	1.09229	0	-0.968223	2.61832	1.95177	2.29516	1.17111	0.464964	0.2371	4.44414	2.4444	-0.380936	-0.810767	2.09766	0.841064	-1.4581	-0.951416	-0.977144	-0.785611
115	ADCY9	adenylate cyclase 9	0.777608	0.0183462	2.66938	1.44225	-2.34091	-1.20246	0.293497	0.28167	1.07248	0.288637	1.17399	0.67137	0	-0.968223	0.810966	0.203196	2.26126	1.14938	0.874793	0.514489	0.282926	-0.175702	1.5746	0.944906	2.16179	0.907801	-1.41369	-0.924914	-2.77481	-1.90903
117	ADCYAP1R1	adenylate cyclase activating polypeptide 1 (pituitary) receptor type I	-1.74157	-1.78898	1.42996	0.578248	-3.1355	-1.67111	2.03132	1.81914	0.656204	-0.0302473	0.395929	-0.0401189	0.503704	-0.278257	1.59524	0.961959	1.48769	0.653444	0.62999	0.348797	2.09988	0.968342	1.47002	0.851014	1.72569	0.45398	-1.38236	-0.906217	1.53182	0.782327
51094	ADIPOR1	adiponectin receptor 1	1.52356	0.553512	4.05949	2.41129	2.44162	1.61831	1.967	1.76224	2.06917	1.05215	0.750022	0.283676	2.00684	1.78071	-1.38681	-1.9231	1.02205	0.354926	2.44458	1.57698	2.30242	1.09587	1.41881	0.805038	2.16993	0.916262	3.26459	1.86675	3.13213	1.78241
79602	ADIPOR2	adiponectin receptor 2	2.56068	1.29757	-0.384906	-0.686894	-0.0884138	0.126078	1.78145	1.59808	3.04757	1.80166	0.496921	0.052232	0.531156	-0.240654	2.39593	1.73661	2.50144	1.30336	2.6965	1.74749	3.26915	1.70457	-0.191386	-0.64059	0.887525	-0.418248	1.26459	0.673292	-1.79163	-1.29461
134	ADORA1	adenosine A1 receptor	0.430862	-0.230417	3.13204	1.76476	-1.44942	-0.676654	1.33088	1.19946	1.67374	0.749234	1.11214	0.614807	1.36397	0.900116	1.4484	0.819893	2.82509	1.51085	1.75298	1.10888	2.5836	1.27291	1.30327	0.701312	1.63823	0.362963	1.64822	0.902213	2.17223	1.18254
135	ADORA2A	adenosine A2a receptor	1.34399	0.424679	1.18713	0.408973	0.641354	0.556499	-1.30944	-1.13647	1.37384	0.5195	0.911048	0.430925	1.79419	1.48943	0.341481	-0.251019	0.778162	0.198568	1.69842	1.07195	1.19485	0.398492	0.176875	-0.309965	1.63823	0.362963	0	-0.0813257	1.2887	0.630391
136	ADORA2B	adenosine A2b receptor	0.180572	-0.409981	1.80234	0.837832	-1.4518	-0.678054	-1.135	-0.982136	1.88872	0.913918	1.39593	0.874317	0.79419	0.119646	1.03336	0.418355	0.949054	0.308126	-2.1359	-1.52327	-0.667756	-0.774298	1.11136	0.529014	3.61551	2.42059	1.42697	0.770187	1.39492	0.696771
140	ADORA3	adenosine A3 receptor	0.0709665	-0.488615	1.06523	0.323995	0.99111	0.762787	-0.257793	-0.206062	0.593645	-0.0781707	1.23243	0.724808	0.531156	-0.240654	0.226004	-0.36274	0.515061	0.0298937	-1.55878	-1.13265	-0.0858203	-0.407883	1.30401	0.701971	1.33867	0.0512303	-1.63385	-1.05629	1.77286	0.932961
148	ADRA1A	adrenoceptor alpha 1A	-0.667425	-1.01835	-1.37556	-1.37748	-2.80691	-1.47731	1.38934	1.25118	0.961229	0.203416	1.28901	0.77655	0.79419	0.119646	0.810966	0.203196	-1.33325	-1.15505	-1.44355	-1.05466	-2.03189	-1.63322	-2.19285	-2.4375	1.63823	0.362963	-2.42286	-1.52711	-2.87927	-1.97432
147	ADRA1B	adrenoceptor alpha 1B	0.590341	-0.116004	0.858314	0.179753	0.0563912	0.211484	0.449226	0.419446	0.593645	-0.0781707	3.52664	2.82271	0.142801	-0.772617	1.226	0.604734	1.17953	0.455882	0.37707	0.17761	1.42411	0.542843	1.23954	0.644095	2.03055	0.771223	0	-0.0813257	-0.797808	-0.673537
146	ADRA1D	adrenoceptor alpha 1D	-2.35686	-2.2304	0.930113	0.229803	1.15809	0.861273	0.678072	0.621908	1.63425	0.718982	0	-0.40217	0	-0.968223	1.7285	1.09089	-2.43128	-1.859	-1.061	-0.79573	2.48795	1.21269	0.888969	0.329351	1.63823	0.362963	-1.64296	-1.06173	2.0882	1.13003
150	ADRA2A	adrenoceptor alpha 2A	1.34465	0.425155	-1.43135	-1.41637	0.553638	0.504764	1.2935	1.16638	0.589031	-0.081705	1.23243	0.724808	1.37915	0.920918	1.03336	0.418355	0.703633	0.150787	0.37707	0.17761	0.501707	-0.0379468	1.04097	0.465819	0.638232	-0.677672	-2.39869	-1.51269	0.699183	0.261983
151	ADRA2B	adrenoceptor alpha 2B	1.26211	0.365938	1.45583	0.596283	-1.8122	-0.89062	-4.23524	-3.72496	1.43137	0.563566	0.676037	0.216022	1.20923	0.688158	0.547932	-0.0512828	1.40188	0.598429	2.11921	1.35676	1.88823	0.835072	0.714639	0.172838	1.88616	0.620966	0.49847	0.216125	0.779343	0.312078
152	ADRA2C	adrenoceptor alpha 2C	0.918963	0.119758	1.4562	0.596536	0.926803	0.724859	1.24157	1.12044	1.85476	0.887903	0.836501	0.362756	0.79419	0.119646	1.34148	0.716456	0.861879	0.252238	0	-0.077606	0.211175	-0.22088	1.24031	0.644783	1.44559	0.16249	1.72686	0.949139	0.99613	0.447556
153	ADRB1	adrenoceptor beta 1	0.482152	-0.193621	0.743214	0.0995168	1.11171	0.833921	0.325211	0.309728	-1.46909	-1.65833	0.0489986	-0.357364	1.37915	0.920918	0.710493	0.105991	1.22678	0.486177	-2.17111	-1.5471	0.885705	0.203837	0.887991	0.328473	0	-1.34184	0.979775	0.503333	1.33368	0.658502
154	ADRB2	adrenoceptor beta 2, surface	1.03444	0.202604	-2.33991	-2.04972	0.558892	0.507862	0.325211	0.309728	0.856679	0.123326	3.04128	2.37889	0.990798	0.388955	1.34148	0.716456	-1.6179	-1.33755	-1.23097	-0.910778	1.31969	0.477094	1.57581	0.945996	1.72569	0.45398	1.09043	0.569363	-1.10822	-0.867524
155	ADRB3	adrenoceptor beta 3	2.20163	1.03998	2.8322	1.55574	0.578183	0.519241	0.241008	0.235233	2.12703	1.09647	0	-0.40217	1.19213	0.66474	1.226	0.604734	1.76503	0.831249	3.26175	2.13008	1.49922	0.590133	-0.683117	-1.08206	1.88616	0.620966	1.0764	0.560993	1.55133	0.794521
84830	ADTRP	androgen-dependent TFPI-regulating protein	2.21392	1.04879	1.404	0.560146	1.05267	0.799097	0.659745	0.605694	0.579759	-0.0888077	0.676037	0.216022	1.37915	0.920918	0.728504	0.123416	1.15177	0.438089	-1.42061	-1.03913	2.82729	1.42635	0.888969	0.329351	1.63823	0.362963	-0.12394	-0.155284	-0.507354	-0.492022
177	AGER	advanced glycosylation end product-specific receptor	1.63168	0.631079	1.8765	0.889528	1.2724	0.928695	-0.450742	-0.376766	-0.920515	-1.23809	1.04801	0.556163	1.01658	0.424276	0.448396	-0.147581	1.20005	0.469037	1.16829	0.71314	2.35091	1.1264	1.47328	0.853944	1.72569	0.45398	1.74239	0.958405	1.3729	0.683015
56894	AGPAT3	1-acylglycerol-3-phosphate O-acyltransferase 3	1.20224	0.32299	1.51868	0.640094	-1.58038	-0.753896	-1.18771	-1.02877	-2.01346	-2.07534	1.04801	0.556163	2.48978	2.44224	1.1646	0.545331	-1.19478	-1.06629	-1.82199	-1.3108	-0.00806962	-0.358927	1.11136	0.529014	1.96016	0.697973	0.979775	0.503333	1.94779	1.04228
185	AGTR1	angiotensin II receptor, type 1	-1.12443	-1.34622	1.40465	0.560605	-2.26554	-1.158	1.59488	1.43302	3.29272	1.98945	1.29027	0.777703	0	-0.968223	0.547932	-0.0512828	1.32331	0.548058	3.7114	2.43442	3.2547	1.69547	1.66698	1.02785	1.63823	0.362963	-3.3415	-2.07529	1.38995	0.693668
186	AGTR2	angiotensin II receptor, type 2	0	-0.539528	1.03232	0.301049	0.714657	0.599734	0.540568	0.500257	0.984294	0.221085	0.984011	0.497644	0	-0.968223	1.68544	1.04922	1.33871	0.557932	0	-0.077606	1.52638	0.607239	0.805471	0.254387	1.44559	0.16249	-1.92434	-1.22963	-1.01954	-0.812105
57085	AGTRAP	angiotensin II receptor-associated protein	1.65593	0.648475	0.144316	-0.317974	-0.62642	-0.191242	-0.267041	-0.214243	1.13989	0.34028	1.04801	0.556163	1.53116	1.12913	0.641041	0.0387982	1.45676	0.633614	-0.192478	-0.207883	1.05821	0.312454	1.11136	0.529014	1.80816	0.539793	-1.32213	-0.87028	1.88581	1.00355
51390	AIG1	androgen-induced 1	0.449478	-0.217062	-1.58172	-1.52119	1.21638	0.895652	-1.62298	-1.41386	1.37652	0.521553	0.20561	-0.214153	1.37915	0.920918	-1.59524	-2.12474	-1.71103	-1.39725	-0.176961	-0.19738	-2.62874	-2.00903	0.502932	-0.0172321	2.54512	1.30671	0.631641	0.295592	-0.866197	-0.716276
55966	AJAP1	adherens junctions associated protein 1	0.2726	-0.343958	0.327235	-0.190461	0.52931	0.490415	0.953242	0.865354	1.53517	0.643085	0.836501	0.362756	0	-0.968223	0.641041	0.0387982	1.00833	0.346127	-1.19407	-0.885802	1.89521	0.83947	0.965118	0.397718	1.44559	0.16249	0.442028	0.182445	1.31136	0.644556
214	ALCAM	activated leukocyte cell adhesion molecule	2.22477	1.05658	-1.52348	-1.48059	-1.73501	-0.845096	0.421697	0.395091	2.85368	1.65313	0.396709	-0.0394052	0.79419	0.119646	0.180572	-0.406694	1.56063	0.700206	2.44365	1.57636	0.670029	0.0680369	1.7629	1.11397	1.80816	0.539793	-1.32716	-0.873278	-1.6587	-1.21154
144245	ALG10B	ALG10B, alpha-1,2-glucosyltransferase	2.14707	1.00083	1.58342	0.685224	0.705212	0.594163	0.849023	0.773151	1.8393	0.876062	0.758499	0.291428	1.20923	0.688158	1.226	0.604734	1.92595	0.93441	1.85574	1.17844	1.69408	0.712828	1.30327	0.701312	1.80816	0.539793	1.25217	0.665878	1.02384	0.464875
80216	ALPK1	alpha-kinase 1	0.718665	-0.0239408	-0.322151	-0.643148	-3.17269	-1.69305	-2.58444	-2.26447	-2.30901	-2.30174	1.28943	0.776934	0.531156	-0.240654	1.39593	0.769133	-2.61447	-1.97645	-0.698998	-0.550716	-2.42059	-1.87797	0.685796	0.146943	1.09954	-0.197623	-2.34699	-1.48184	0.915702	0.397294
269	AMHR2	anti-Mullerian hormone receptor, type II	-1.1375	-1.3556	0.743363	0.0996204	0.709942	0.596953	0	0.0220105	-1.83772	-1.94072	0.289854	-0.137117	0.531156	-0.240654	-2.531	-3.03007	1.14828	0.435851	-0.460051	-0.388987	1.61269	0.661584	1.36008	0.752316	0	-1.34184	-4.25969	-2.6232	-0.763376	-0.652019
120425	AMICA1	adhesion molecule, interacts with CXADR antigen 1	0.607019	-0.104038	0.617967	0.0122072	-1.63189	-0.784275	1.05817	0.958186	1.07248	0.288637	0.837651	0.363808	1.98715	1.75374	1.77032	1.13135	-1.16811	-1.04919	-2.87721	-2.02501	0.107273	-0.286302	1.36149	0.753581	0.807355	-0.501676	-0.450084	-0.349903	-1.20635	-0.928847
57463	AMIGO1	adhesion molecule with Ig-like domain 1	1.88518	0.812942	0.703018	0.0714961	0.218342	0.307004	1.0357	0.93831	1.49411	0.611628	1.17354	0.670953	1.37915	0.920918	1.7285	1.09089	-1.25885	-1.10736	-0.241956	-0.241371	0.558506	-0.00218366	0.625934	0.0931991	1.63823	0.362963	1.47052	0.796177	1.2887	0.630391
347902	AMIGO2	adhesion molecule with Ig-like domain 2	1.88518	0.812942	-1.49371	-1.45984	1.42562	1.01907	0.293497	0.28167	1.4842	0.604041	1.04801	0.556163	1.79419	1.48943	1.226	0.604734	1.78942	0.846881	0.758403	0.435711	0.712908	0.0950354	-0.877678	-1.25674	1.63823	0.362963	-0.965891	-0.657699	1.23285	0.59549
386724	AMIGO3	adhesion molecule with Ig-like domain 3	2.40248	1.18407	0.821663	0.154203	0.994991	0.765076	-0.117079	-0.0815707	0	-0.532931	-1.10952	-1.41676	1.66866	1.31748	0.962969	0.350255	0.961046	0.315814	0	-0.077606	1.19616	0.399312	1.17768	0.588551	1.87447	0.608801	1.15366	0.607096	0.99613	0.447556
81693	AMN	amnion associated transmembrane protein	-2.4321	-2.28437	0.929852	0.229621	0.719356	0.602505	1.01641	0.921237	1.76607	0.81996	0.495464	0.0509001	1.53116	1.12913	0	-0.581393	1.09096	0.3991	1.74212	1.10153	1.74623	0.745662	0.173669	-0.312844	1.22319	-0.0689394	0	-0.0813257	2.00453	1.07774
56172	ANKH	ANKH inorganic pyrophosphate transport regulator	2.40248	1.18407	2.06374	1.02006	1.41408	1.01226	0.421697	0.395091	2.63075	1.48235	-0.956438	-1.27677	1.20923	0.688158	0.341481	-0.251019	3.53417	1.96544	0.482167	0.248744	2.46356	1.19733	1.30107	0.699335	3.09766	1.8817	1.70641	0.936935	1.93325	1.03319
126549	ANKLE1	ankyrin repeat and LEM domain containing 1	1.16408	0.295608	1.50289	0.629088	0.99111	0.762787	0.53943	0.49925	-1.05309	-1.33965	0.395929	-0.0401189	1.8886	1.61875	0.888969	0.278662	1.29176	0.527837	0.846155	0.495106	3.18868	1.6539	0.0392113	-0.43356	2.63823	1.4036	-1.09493	-0.734703	3.42267	1.96398
118932	ANKRD22	ankyrin repeat domain 22	0.615857	-0.0976979	0.247157	-0.246284	-0.0576911	0.144198	-0.513534	-0.432319	0.852835	0.120382	-3.32193	-3.43986	1.37915	0.920918	1.49902	0.868873	0.291765	-0.113261	-1.65336	-1.19667	-0.973305	-0.966686	-1.48083	-1.79825	0.70044	-0.612936	-1.59948	-1.03578	0.0356523	-0.152679
157567	ANKRD46	ankyrin repeat domain 46	4.07996	2.38753	4.15235	2.47602	0.307335	0.359493	0.482059	0.448494	3.26297	1.96666	0.398269	-0.037979	1.79419	1.48943	1.71621	1.07899	3.09647	1.68483	0.468019	0.239168	3.9978	2.16337	3.55902	2.72651	2.44559	1.20313	2.6507	1.50042	3.36431	1.92751
55107	ANO1	anoctamin 1, calcium activated chloride channel	3.34895	1.86309	3.20569	1.8161	0.859495	0.68516	0.977019	0.88639	4.62794	3.0123	0.758499	0.291428	0.503704	-0.278257	0.962969	0.350255	1.62271	0.740009	2.60593	1.68619	1.58398	0.643504	1.57034	0.941081	0.808157	-0.500842	1.78295	0.982609	1.29776	0.636053
55129	ANO10	anoctamin 10	1.24874	0.356351	0.217017	-0.267295	1.11171	0.833921	-0.226578	-0.178445	0	-0.532931	-2.7061	-2.87672	1	0.401561	0.540568	-0.0584067	0.713119	0.156868	-1.63059	-1.18126	-0.403539	-0.607934	1.52577	0.90107	1.44559	0.16249	1.61233	0.880794	0.52412	0.152581
57101	ANO2	anoctamin 2, calcium activated chloride channel	1.81513	0.762688	1.15535	0.386817	-2.01732	-1.0116	0.474911	0.44217	-0.197896	-0.684529	1.17354	0.670953	0	-0.968223	-0.0661771	-0.645417	1.4511	0.629987	1.84563	1.17159	-0.516148	-0.678838	0.719044	0.176793	2.03055	0.771223	-4.32193	-2.66034	-1.81869	-1.31152
63982	ANO3	anoctamin 3	-1.20569	-1.40452	1.7021	0.767955	-1.55782	-0.74059	-0.686159	-0.585042	-1.11312	-1.38563	0.980891	0.494792	0.209228	-0.681626	-1.20425	-1.74647	-2.70198	-2.03255	-1.37874	-1.01079	1.75878	0.753564	0	-0.468763	1.80816	0.539793	-4.52273	-2.78016	-2.29741	-1.61069
121601	ANO4	anoctamin 4	-1.03891	-1.28487	-2.01991	-1.82665	-3.29033	-1.76243	-2.68401	-2.35256	1.38453	0.527688	0.910502	0.430425	0.79419	0.119646	0.962969	0.350255	-2.42984	-1.85808	-0.944858	-0.717124	1.73001	0.735449	1.0348	0.460279	2.03055	0.771223	-3.98904	-2.4617	-2.70125	-1.86307
203859	ANO5	anoctamin 5	1.52163	0.552124	0.701489	0.0704303	-1.12219	-0.483648	0	0.0220105	-3.3493	-3.09866	0.496193	0.0515662	1.53116	1.12913	1.03336	0.418355	0.874615	0.260404	0	-0.077606	0	-0.353846	-1.95903	-2.22758	0.638232	-0.677672	-2.47992	-1.56116	-2.72094	-1.87537
196527	ANO6	anoctamin 6	1.8365	0.778022	0.62733	0.0187341	0.476912	0.45951	0.0210371	0.0406223	1.43137	0.563566	1.7585	1.20586	1.01658	0.424276	1.54793	0.916192	1.09459	0.401429	-0.88266	-0.675026	0.718613	0.0986272	-1.24211	-1.58393	1.33867	0.0512303	0.93957	0.479341	1.20891	0.580527
50636	ANO7	anoctamin 7	-2.07539	-2.02846	0.617967	0.0122072	0.641354	0.556499	-0.272023	-0.218651	0	-0.532931	1.8751	1.31249	1.01658	0.424276	-0.643856	-1.20431	-1.17478	-1.05346	1.03411	0.622322	1.26522	0.4428	0.805471	0.254387	-0.485427	-1.84699	1.69967	0.932912	1.45663	0.735337
57719	ANO8	anoctamin 8	1.16408	0.295608	2.06434	1.02047	-2.26992	-1.16059	0.612571	0.563959	1.07248	0.288637	0.588574	0.136043	1.5175	1.11042	2.25575	1.60099	0.791656	0.207218	-2.16878	-1.54552	3.20335	1.66314	1.30327	0.701312	1.88616	0.620966	1.36334	0.732218	2.76952	1.55581
338440	ANO9	anoctamin 9	0.344648	-0.292269	0.252027	-0.242889	-1.70472	-0.827231	0	0.0220105	1.3223	0.48001	1.0485	0.556618	1.53116	1.12913	-2.68743	-3.18142	1.70838	0.794932	-2.16038	-1.53984	-1.65511	-1.39598	1.47393	0.854529	0	-1.34184	0.0904284	-0.0273646	1.0882	0.505097
290	ANPEP	alanyl (membrane) aminopeptidase	0.293359	-0.329065	1.57114	0.676664	0.850955	0.680123	-1.32946	-1.15418	0.848981	0.117429	1.0485	0.556618	1.20923	0.688158	0.100473	-0.484188	-2.54829	-1.93402	1.88566	1.19868	2.33748	1.11794	1.47393	0.854529	1.80816	0.539793	0.0441674	-0.0549698	-0.790108	-0.668725
84168	ANTXR1	anthrax toxin receptor 1	1.84356	0.783083	1.03207	0.300879	-2.2558	-1.15226	0.36257	0.34278	-0.641666	-1.02448	1.28901	0.77655	1.01658	0.424276	0.962969	0.350255	-0.814001	-0.822167	1.57509	0.988478	0.539186	-0.0143487	1.24107	0.645471	1.09766	-0.199571	1.22699	0.650855	-0.906025	-0.741165
118429	ANTXR2	anthrax toxin receptor 2	1.52163	0.552124	0.400045	-0.139706	0.278784	0.342653	0.546105	0.505156	1.38187	0.525647	-0.115477	-0.507767	0.209228	-0.681626	1.4484	0.819893	1.02746	0.358394	-0.67636	-0.535393	-0.844391	-0.885516	1.17687	0.587833	1.44559	0.16249	0	-0.0813257	0.427919	0.0924614
8639	AOC3	amine oxidase, copper containing 3	1.11827	0.262747	-1.50194	-1.46557	-1.13692	-0.492337	0.325211	0.309728	0.265947	-0.329203	0.837076	0.363282	1.53116	1.12913	0	-0.581393	-1.19246	-1.0648	-0.583329	-0.472426	-2.46546	-1.90622	0.825057	0.271971	0.638232	-0.677672	1.23964	0.6584	-2.43556	-1.69702
147495	APCDD1	adenomatosis polyposis coli down-regulated 1	1.71097	0.687963	-0.21695	-0.569812	0.987218	0.760492	0.034924	0.0529082	1.53037	0.639405	1.49546	0.965336	1.79419	1.48943	0.341481	-0.251019	1.23009	0.488297	1.39033	0.863423	-0.488999	-0.661744	1.10968	0.527509	0.96016	-0.342662	0.753552	0.368339	0.746453	0.291524
51107	APH1A	APH1A gamma secretase subunit	4.07397	2.38323	4.14909	2.47375	2.01841	1.3687	0.725914	0.664235	2.62751	1.47987	0.677322	0.217197	0	-0.968223	0.337035	-0.25532	3.80075	2.13634	2.27568	1.46267	3.09468	1.59471	2.23993	1.54224	2.99578	1.77568	3.05417	1.74118	4.05505	2.35918
83464	APH1B	APH1B gamma secretase subunit	1.39289	0.459768	0.164498	-0.303905	-1.9472	-0.970245	-1.078	-0.93171	1.14619	0.345102	0.495464	0.0509001	0.531156	-0.240654	0.728504	0.123416	0.698867	0.147731	-0.37707	-0.332822	-0.744201	-0.822431	0.76626	0.219183	1.44559	0.16249	0.816183	0.405713	1.50821	0.767569
187	APLNR	apelin receptor	1.36375	0.438857	1.09625	0.345618	0.99111	0.762787	1.09543	0.991151	1.66719	0.744216	1.34346	0.826339	0.997028	0.39749	0.888969	0.278662	0.395998	-0.0464377	-2.83996	-1.9998	0.276141	-0.179974	1.24261	0.646845	1.22319	-0.0689394	0	-0.0813257	-1.69252	-1.23267
333	APLP1	amyloid beta (A4) precursor-like protein 1	1.87832	0.808025	-0.697059	-0.904496	-3.35895	-1.80291	-0.133214	-0.0958451	1.31393	0.473604	0	-0.40217	0	-0.968223	1.39593	0.769133	2.65884	1.40427	2.81022	1.82446	3.09962	1.59782	1.10968	0.527509	2.49621	1.25581	-2.23718	-1.41631	2.12952	1.15585
334	APLP2	amyloid beta (A4) precursor-like protein 2	0.850576	0.0706958	0.00184071	-0.417294	0.940914	0.733182	0.303885	0.290861	0.9241	0.174974	0.911048	0.430925	1.87795	1.60416	1.59524	0.961959	-1.00161	-0.942445	-0.957456	-0.725651	0.614864	0.0333019	1.17527	0.586394	0.628031	-0.688287	-0.0838411	-0.131356	1.88581	1.00355
57136	APMAP	adipocyte plasma membrane associated protein	2.16408	1.01303	1.52715	0.646001	3.62223	2.31464	1.43591	1.29238	0.455094	-0.184307	1.49546	0.965336	-1.1127	-2.49238	1.2849	0.661713	2.6364	1.38988	1.4684	0.916267	2.83585	1.43174	1.36149	0.753581	2.03055	0.771223	2.8777	1.63588	1.63242	0.845196
8542	APOL1	apolipoprotein L, 1	1.09481	0.245917	-2.15871	-1.92341	0.465847	0.452984	0.63743	0.585952	1.07248	0.288637	1.28901	0.77655	1.37915	0.920918	0.888969	0.278662	1.99074	0.975951	0.0683987	-0.0313109	-1.75759	-1.46051	1.41813	0.80443	2.16179	0.907801	-1.62936	-1.05361	1.83356	0.970893
80832	APOL4	apolipoprotein L, 4	1.93226	0.846722	0	-0.418577	-1.53304	-0.725969	0.321928	0.306824	0.92739	0.177494	1.04801	0.556163	1.37915	0.920918	1.4484	0.819893	1.09096	0.3991	-1.1775	-0.874588	-0.0970886	-0.414978	1.11052	0.528262	1.72569	0.45398	1.35604	0.727859	-1.16849	-0.905189
80830	APOL6	apolipoprotein L, 6	2.16408	1.01303	0.782755	0.12708	0.553638	0.504764	-1.16993	-1.01304	1.2043	0.389617	-1.56457	-1.83287	1.66866	1.31748	1.54793	0.916192	1.45958	0.635422	-1.03411	-0.777534	-1.97988	-1.60048	1.24184	0.646158	2.22319	0.971696	1.84956	1.02236	1.79551	0.947117
81575	APOLD1	apolipoprotein L domain containing 1	1.30363	0.395725	1.2312	0.439694	0.93086	0.727252	0.506091	0.469755	1.48172	0.602136	0.836501	0.362756	0.79419	0.119646	1.226	0.604734	0.771278	0.194154	1.04993	0.633032	2.81765	1.42028	-0.753851	-1.14557	1.80816	0.539793	1.16696	0.615032	1.65737	0.860786
351	APP	amyloid beta (A4) precursor protein	-1.78854	-1.82267	-0.972248	-1.09633	-2.25999	-1.15473	-0.953242	-0.821333	1.38719	0.529726	0.114567	-0.297406	1.77135	1.45814	1.1646	0.545331	1.50144	0.66226	-2.63817	-1.86323	0.0970578	-0.292734	1.03833	0.463447	2.22319	0.971696	-1.00907	-0.683467	-2.61529	-1.80935
358	AQP1	aquaporin 1 (Colton blood group)	1.47696	0.520077	1.29964	0.487397	1.92477	1.31347	0.76213	0.696275	1.5751	0.673672	1.04801	0.556163	0.77135	0.0883605	2.54793	1.88367	-0.573672	-0.668092	0.0593079	-0.037464	1.75669	0.752252	1.76024	1.11157	1.88616	0.620966	1.48121	0.802553	0.99613	0.447556
89872	AQP10	aquaporin 10	2.25154	1.07578	2.95321	1.6401	0.918653	0.720052	-0.0357041	-0.00957727	1.88119	0.908151	0	-0.40217	0.79419	0.119646	1.4484	0.819893	2.98412	1.6128	2.12715	1.36213	2.106	0.972193	0.79612	0.245991	1.96016	0.697973	0.811762	0.403075	2.18205	1.18868
282679	AQP11	aquaporin 11	2.02206	0.911144	2.85622	1.57249	1.10814	0.83181	-0.356009	-0.292954	2.33458	1.25547	0.0480054	-0.358272	0.77135	0.0883605	1.10047	0.483287	2.6201	1.37943	0.436475	0.217818	3.04171	1.56136	1.80392	1.15079	1.54512	0.26607	2.25447	1.26398	2.33808	1.28618
359	AQP2	aquaporin 2 (collecting duct)	1.39289	0.459768	0	-0.418577	0.641354	0.556499	1.30944	1.18049	0	-0.532931	0.588574	0.136043	0	-0.968223	0.547932	-0.0512828	-0.71458	-0.758428	0.866297	0.508738	-1.3626	-1.2118	0	-0.468763	0.223194	-1.10957	-3.90689	-2.41267	0	-0.17496
360	AQP3	aquaporin 3 (Gill blood group)	1.36375	0.438857	0.781308	0.126072	1.22632	0.901514	0.571019	0.527198	1.94714	0.95867	0	-0.40217	1.66866	1.31748	0.226004	-0.36274	1.33871	0.557932	2.23793	1.43711	1.15845	0.375569	1.30181	0.699995	2.03055	0.771223	2.10867	1.17698	1.41537	0.709556
361	AQP4	aquaporin 4	1.00957	0.184759	0.615534	0.0105109	-2.48298	-1.28625	-0.865779	-0.743954	1.11764	0.323234	-1.75041	-2.00281	1.66866	1.31748	1.10047	0.483287	0.928843	0.295169	0.783985	0.453027	2.22483	1.04701	0.716843	0.174817	1.09766	-0.199571	-1.7096	-1.10149	1.80189	0.951105
362	AQP5	aquaporin 5	1.04672	0.211413	0.782899	0.127181	0.719356	0.602505	-1.55289	-1.35185	0.260155	-0.33364	0.395929	-0.0401189	0	-0.968223	1.34148	0.716456	1.28224	0.521729	-0.37707	-0.332822	-1.04255	-1.01029	1.04009	0.465029	1.33867	0.0512303	1.18014	0.622895	1.19927	0.574503
363	AQP6	aquaporin 6, kidney specific	0	-0.539528	1.40644	0.561849	0.0563912	0.211484	-0.420667	-0.350159	1.2043	0.389617	0	-0.40217	1.20923	0.688158	1.34148	0.716456	1.60735	0.730158	0.606872	0.33315	0.980467	0.263503	0.805471	0.254387	1.09766	-0.199571	1.18014	0.622895	1.56992	0.806135
364	AQP7	aquaporin 7	0.671871	-0.0575121	1.50333	0.629394	0.863746	0.687667	1.72591	1.54895	1.10153	0.310896	1.11214	0.614807	1.01658	0.424276	1.03336	0.418355	0.594574	0.0808697	2.13505	1.36748	1.27182	0.446951	0.622411	0.0900361	0.96016	-0.342662	0.994768	0.51228	1.2887	0.630391
343	AQP8	aquaporin 8	-1.36344	-1.51769	2.42941	1.27496	-1.24065	-0.553519	-2.06702	-1.80671	-1.66688	-1.80984	0	-0.40217	0	-0.968223	1.10047	0.483287	-2.06078	-1.62147	0.558785	0.300602	1.10481	0.341794	0.29813	-0.201103	0.445587	-0.878145	1.06224	0.55254	0.855283	0.359536
366	AQP9	aquaporin 9	1.72632	0.698974	0.572899	-0.0192096	-2.41573	-1.24659	0.865779	0.787975	-2.32193	-2.31164	0.758499	0.291428	1.79419	1.48943	0	-0.581393	0.878836	0.263109	0	-0.077606	-0.614997	-0.741078	1.41881	0.805038	1.44559	0.16249	0.699667	0.336185	0.164884	-0.0719178
206338	AQPEP	laeverin	0	-0.539528	0.0970646	-0.350913	-2.71534	-1.4233	0	0.0220105	-1.04556	-1.33388	3.28174	2.59877	-1.44816	-2.95189	1.03336	0.418355	0	-0.300311	0	-0.077606	0	-0.353846	0.602665	0.0723076	0.638232	-0.677672	-3.93293	-2.42821	0	-0.17496
374	AREG	amphiregulin	0	-0.539528	1.35305	0.524633	0.859495	0.68516	1.37426	1.23783	0	-0.532931	0	-0.40217	0	-0.968223	0.641041	0.0387982	0	-0.300311	0.482544	0.248999	0.553899	-0.00508411	0	-0.468763	0	-1.34184	0	-0.0813257	0	-0.17496
285598	ARL10	ADP-ribosylation factor-like 10	1.31382	0.40304	1.06559	0.324243	1.37832	0.991166	0.673134	0.61754	1.07578	0.291166	2.34346	1.74077	1.20923	0.688158	1.39593	0.769133	1.58686	0.71702	-1.56612	-1.13762	0.36107	-0.126499	1.36079	0.752948	2.09766	0.841064	1.05323	0.547166	1.88581	1.00355
23204	ARL6IP1	ADP-ribosylation factor-like 6 interacting protein 1	2.00957	0.902183	0.36548	-0.163801	1.79113	1.23464	-1.38934	-1.20716	1.2043	0.389617	1.11261	0.615241	0.209228	-0.681626	1.03336	0.418355	1.27905	0.519684	-0.0135825	-0.0867991	-0.00249712	-0.355418	1.84581	1.1884	2.39312	1.14853	-1.00105	-0.678683	1.88581	1.00355
151188	ARL6IP6	ADP-ribosylation factor-like 6 interacting protein 6	1.15276	0.28749	1.32237	0.503242	-1.70602	-0.827998	-0.1282	-0.0914099	1.26883	0.439057	0.588574	0.136043	0	-0.968223	-1.63923	-2.16731	1.50963	0.667509	-0.943192	-0.715996	0.254838	-0.193388	-0.595644	-1.00353	1.22319	-0.0689394	1.21424	0.643245	2.15238	1.17014
51309	ARMCX1	armadillo repeat containing, X-linked 1	1.78613	0.741883	0.229536	-0.258568	-1.42935	-0.664817	1.09543	0.991151	1.58208	0.67902	1.11758	0.619783	1.66866	1.31748	1.54793	0.916192	1.09459	0.401429	-0.603341	-0.485971	-0.306595	-0.546893	0.966971	0.399381	0.169925	-1.16501	-1.39794	-0.915514	2.31812	1.27371
9823	ARMCX2	armadillo repeat containing, X-linked 2	1.5987	0.60742	-0.841499	-1.00518	0.994991	0.765076	-0.157245	-0.117106	-0.628663	-1.01452	1.29111	0.77847	1.66866	1.31748	1.49902	0.868873	-1.90452	-1.5213	-0.291994	-0.275239	-0.282069	-0.53145	0.178475	-0.308529	1.22319	-0.0689394	-1.2315	-0.816195	-2.1416	-1.51332
100131755	ARMCX4	armadillo repeat containing, X-linked 4	0	-0.539528	0	-0.418577	0	0.178225	0.125531	0.133069	0	-0.532931	0	-0.40217	0	-0.968223	0	-0.581393	0	-0.300311	0.514172	0.270406	0.280108	-0.177477	0	-0.468763	0	-1.34184	0	-0.0813257	0	-0.17496
54470	ARMCX6	armadillo repeat containing, X-linked 6	1.30363	0.395725	0.807519	0.144343	0.393897	0.410547	0.197533	0.19677	1.96327	0.971029	1.49653	0.966307	0.209228	-0.681626	1.7285	1.09089	-0.951071	-0.910042	0.536997	0.285855	0.152866	-0.257594	0.719044	0.176793	0.893085	-0.412463	1.37485	0.739085	1.73316	0.908148
419	ART3	ADP-ribosyltransferase 3	0.971431	0.1574	2.1873	1.10619	0.378319	0.40136	0.648275	0.595547	0.469219	-0.173487	0	-0.40217	1.37915	0.920918	0	-0.581393	-1.3375	-1.15778	2.72072	1.76389	1.32251	0.47887	0	-0.468763	0	-1.34184	-2.32193	-1.46688	0.842956	0.351832
64801	ARV1	ARV1 homolog (S. cerevisiae)	2.62351	1.34264	4.17533	2.49204	1.54903	1.09185	0.75171	0.687057	2.26161	1.19957	0.174447	-0.24265	1.5037	1.09153	-1.95553	-2.47331	3.17783	1.73699	1.75298	1.10888	2.11848	0.98005	-0.0478056	-0.511683	1.54512	0.26607	2.67245	1.5134	3.06974	1.74343
56624	ASAH2	N-acylsphingosine amidohydrolase (non-lysosomal ceramidase) 2	2.38324	1.17027	0.781887	0.126475	0.378319	0.40136	0	0.0220105	1.96505	0.972393	1.11214	0.614807	1.01658	0.424276	1.4484	0.819893	1.02366	0.355954	0	-0.077606	0	-0.353846	1.17768	0.588551	1.44559	0.16249	0.351744	0.128569	1.45663	0.735337
140456	ASB11	ankyrin repeat and SOCS box containing 11, E3 ubiquitin protein ligase	1.36375	0.438857	0.347819	-0.176113	-2.08633	-1.05231	0.736966	0.674012	-0.785875	-1.13495	0	-0.40217	0.174831	-0.728742	0.341481	-0.251019	0	-0.300311	-0.184152	-0.202248	0.180572	-0.240149	0.515044	-0.00635821	1.63823	0.362963	1.32078	0.706817	-2.36639	-1.65379
140458	ASB5	ankyrin repeat and SOCS box containing 5	-0.671871	-1.02154	0	-0.418577	-1.56272	-0.743478	0.844051	0.768752	0.311812	-0.294068	0.289013	-0.137886	1.01658	0.424276	0.247928	-0.341529	-2.62537	-1.98343	-0.973008	-0.736177	-0.348778	-0.573453	0.178475	-0.308529	1	-0.301203	-2.80156	-1.75309	-3.96803	-2.65472
432	ASGR1	asialoglycoprotein receptor 1	-0.838735	-1.14126	0.527759	-0.0506768	0.0563912	0.211484	-0.323064	-0.263808	1.48917	0.607841	0.676037	0.216022	1.66866	1.31748	1.2849	0.661713	0.413559	-0.0351794	-0.0683987	-0.123901	0.971635	0.257942	-1.65554	-1.9551	1.33867	0.0512303	0.849557	0.425628	1.48478	0.752928
433	ASGR2	asialoglycoprotein receptor 2	0	-0.539528	0.661041	0.0422337	-0.323817	-0.0127649	0	0.0220105	0	-0.532931	1.17354	0.670953	1.01658	0.424276	1.49902	0.868873	0	-0.300311	0.783241	0.452523	1.48247	0.57959	-1.15222	-1.50323	0	-1.34184	0.14521	0.00532516	1.45663	0.735337
51802	ASIC5	acid-sensing (proton-gated) ion channel family member 5	0	-0.539528	0.703018	0.0714961	-1.82112	-0.895885	0.76601	0.699708	0.770147	0.0570384	0.981412	0.495268	0.79419	0.119646	1.25376	0.631585	-3.91671	-2.81131	0.341668	0.153648	-0.439894	-0.630825	0.526399	0.00383619	1.63823	0.362963	1.47052	0.796177	-2.37978	-1.66217
444	ASPH	aspartate beta-hydroxylase	2.1753	1.02109	0.409452	-0.133148	-1.27264	-0.572387	0.566219	0.522951	-0.202688	-0.6882	1.63363	1.09168	1.79761	1.49411	1.2849	0.661713	0.361168	-0.068767	-0.436294	-0.372907	2.02597	0.921801	2.03259	1.35609	2.16179	0.907801	-1.08627	-0.729531	1.66439	0.865174
460	ASTN1	astrotactin 1	-2.24469	-2.14992	0.264632	-0.234102	-2.41546	-1.24643	0.678072	0.621908	-2.66572	-2.575	0	-0.40217	1.01658	0.424276	0.341481	-0.251019	-3.25983	-2.39018	-2.06084	-1.47246	2.57099	1.26497	0.624761	0.0921456	2.16179	0.907801	-2.37341	-1.4976	-0.354054	-0.39622
285973	ATG9B	autophagy related 9B	0.822287	0.0504005	1.09637	0.345699	-1.01477	-0.420296	0.796839	0.726983	0.260155	-0.33364	1.34548	0.828188	0.557838	-0.204105	1.96297	1.31773	1.96913	0.962097	0.554614	0.297779	2.78563	1.40012	1.71739	1.07311	0.874469	-0.431835	-1.8596	-1.191	-0.836781	-0.697893
57194	ATP10A	ATPase, class V, type 10A	1.44948	0.500362	-0.254034	-0.595663	1.05593	0.801017	0.387205	0.364575	1.63201	0.717265	0.173536	-0.243483	1.65625	1.30048	1.03336	0.418355	0.0732352	-0.25336	0.419828	0.20655	-0.611785	-0.739055	1.52262	0.898245	1.80816	0.539793	0.892312	0.451141	0.650311	0.231442
57205	ATP10D	ATPase, class V, type 10D	1.39289	0.459768	0.221246	-0.264347	0.714657	0.599734	-0.596698	-0.505895	1.13989	0.34028	0.173536	-0.243483	1.37915	0.920918	0.728504	0.123416	1.70125	0.790359	-0.230974	-0.233938	0.0478653	-0.323708	1.10968	0.527509	1.33867	0.0512303	0.816183	0.405713	0	-0.17496
23250	ATP11A	ATPase, class VI, type 11A	0.365635	-0.277213	0.0393965	-0.391114	1.23284	0.905359	-1.45074	-1.26148	1.74962	0.807364	1.04999	0.557979	1.01658	0.424276	1.1646	0.545331	-1.1372	-1.02937	1.84546	1.17147	-0.354193	-0.576863	1.36149	0.753581	2.68263	1.4498	-1.56572	-1.01563	-0.398634	-0.42408
23200	ATP11B	ATPase, class VI, type 11B	2.93557	1.56652	-2.23489	-1.97651	-2.33866	-1.20113	2.16794	1.94002	4.10234	2.60966	0.792517	0.322536	0.584963	-0.166951	0.888969	0.278662	-1.01251	-0.949433	5.52058	3.65894	3.67473	1.95994	-0.589629	-0.998131	1.80816	0.539793	-3.42455	-2.12485	-3.0726	-2.09513
286410	ATP11C	ATPase, class VI, type 11C	1.65593	0.648475	-0.768677	-0.95442	-2.90404	-1.5346	-0.692172	-0.590362	-1.30662	-1.53387	0.399827	-0.0365543	0.531156	-0.240654	1.10047	0.483287	-1.33902	-1.15875	-2.90655	-2.04487	-0.822587	-0.871787	0.965118	0.397718	1.08746	-0.210186	-2.72918	-1.7099	-4.15063	-2.76883
479	ATP12A	ATPase, H+/K+ transporting, nongastric, alpha polypeptide	1.00957	0.184759	0.820114	0.153123	-1.90163	-0.943367	0	0.0220105	-1.66238	-1.8064	0.175357	-0.241818	1.01658	0.424276	0.321928	-0.269936	-4.00611	-2.86863	-2.43948	-1.72875	1.69413	0.712861	0	-0.468763	1.33867	0.0512303	-0.729176	-0.516445	1.22337	0.589567
57130	ATP13A1	ATPase type 13A1	1.89879	0.822706	1.68156	0.753637	1.27878	0.932459	1.35902	1.22435	1.43908	0.569474	1.49583	0.965669	1.36397	0.900116	1.77032	1.13135	-1.12825	-1.02363	1.0271	0.617577	-0.0440137	-0.381559	1.11052	0.528262	2.80816	1.58043	-2.54355	-1.59913	2.24935	1.23074
79572	ATP13A3	ATPase type 13A3	0.129142	-0.446878	2.44236	1.28399	1.22632	0.901514	0.59487	0.548299	2.03874	1.02884	1.72035	1.17098	1.01658	0.424276	0	-0.581393	2.6048	1.36962	4.81521	3.18152	3.9925	2.16003	0.653589	0.118028	2.28209	1.03298	0.519358	0.228589	0.9317	0.407291
84239	ATP13A4	ATPase type 13A4	1.63168	0.631079	-0.491758	-0.76138	0.93086	0.727252	-0.122403	-0.086281	0.400568	-0.226077	1.44957	0.923365	0	-0.968223	1.03336	0.418355	-0.823733	-0.828405	-0.242318	-0.241616	3.87277	2.08464	-0.286304	-0.725807	0.223194	-1.10957	-3.92434	-2.42308	0.300447	0.0128002
344905	ATP13A5	ATPase type 13A5	-1.92903	-1.92346	1.61813	0.709419	-2.63467	-1.37572	-0.940528	-0.810085	1.52682	0.636688	-2.37517	-2.57411	1.20923	0.688158	-1.56714	-2.09756	0	-0.300311	2.27267	1.46063	0.691878	0.0817937	0.884073	0.324956	0.808157	-0.500842	-4.33175	-2.6662	0.030814	-0.155703
476	ATP1A1	ATPase, Na+/K+ transporting, alpha 1 polypeptide	1.94544	0.856174	-1.81406	-1.68316	-2.85684	-1.50676	-2.16084	-1.8897	-0.388741	-0.830725	-1.23666	-1.53302	1.20923	0.688158	1.1646	0.545331	0.331869	-0.0875503	-2.13547	-1.52298	0.375004	-0.117725	0.805471	0.254387	1.72569	0.45398	-0.661793	-0.476236	0.577377	0.185863
477	ATP1A2	ATPase, Na+/K+ transporting, alpha 2 polypeptide	2.95849	1.58296	2.83569	1.55818	1.16155	0.863312	-1.2581	-1.09104	0.73299	0.0285741	1.39671	0.875031	1.37915	0.920918	1.226	0.604734	0.543303	0.0479998	2.17555	1.3949	2.52231	1.23432	0.887012	0.327595	2.28209	1.03298	-1.10936	-0.743314	0.134935	-0.090634
478	ATP1A3	ATPase, Na+/K+ transporting, alpha 3 polypeptide	1.54778	0.570886	0.998009	0.277133	-2.21472	-1.12803	1.11371	1.00732	0	-0.532931	0.174447	-0.24265	1.20923	0.688158	0.736966	0.131603	-2.2603	-1.74939	-0.697621	-0.549784	0.24303	-0.200822	0.719044	0.176793	1.33867	0.0512303	-2.82346	-1.76616	0.746453	0.291524
480	ATP1A4	ATPase, Na+/K+ transporting, alpha 4 polypeptide	0.0220569	-0.523704	3.0124	1.68136	0.454617	0.446361	0.985803	0.894162	1.17996	0.370973	-2.20001	-2.41394	0	-0.968223	0.547932	-0.0512828	2.86417	1.5359	-0.379373	-0.334381	1.27455	0.448673	0.887012	0.327595	2.44559	1.20313	-1.43381	-0.936919	-1.28109	-0.975557
481	ATP1B1	ATPase, Na+/K+ transporting, beta 1 polypeptide	3.00643	1.61735	3.18525	1.80186	1.45743	1.03783	0.222392	0.218764	2.60954	1.4661	1.17445	0.671786	1.53116	1.12913	1.64104	1.00627	1.57144	0.707138	2.11036	1.35077	2.11251	0.97629	1.17768	0.588551	2.72569	1.49462	2.28913	1.28466	-0.493093	-0.48311
482	ATP1B2	ATPase, Na+/K+ transporting, beta 2 polypeptide	1.0461	0.210966	1.06547	0.32416	-0.101614	0.118292	-1.08029	-0.933736	1.14304	0.342694	1.04801	0.556163	2.37158	2.28033	1.39593	0.769133	0.17255	-0.189689	0	-0.077606	0.915902	0.22285	-1.42287	-1.74621	-2.63823	-4.08728	1.21424	0.643245	1.8115	0.957109
483	ATP1B3	ATPase, Na+/K+ transporting, beta 3 polypeptide	1.90554	0.827554	-0.306938	-0.632543	1.64135	1.14631	-0.734888	-0.628153	1.62386	0.711021	1.29027	0.777703	0.79419	0.119646	0.547932	-0.0512828	1.78492	0.844002	3.82031	2.50813	3.09055	1.59211	1.92326	1.25793	2.03055	0.771223	1.7992	0.992308	-1.43921	-1.07437
23439	ATP1B4	ATPase, Na+/K+ transporting, beta 4 polypeptide	0.850576	0.0706958	0	-0.418577	-2.64354	-1.38095	0.450742	0.420787	0.908999	0.163405	-1.17298	-1.47479	0	-0.968223	0.888969	0.278662	0.246755	-0.142117	1.15198	0.702097	0.579889	0.0112804	0	-0.468763	0.638232	-0.677672	0	-0.0813257	0	-0.17496
488	ATP2A2	ATPase, Ca++ transporting, cardiac muscle, slow twitch 2	1.63168	0.631079	0.612668	0.00851329	-2.58525	-1.34657	-0.0324268	-0.0066778	0.376525	-0.244495	1.79832	1.24228	0.79419	0.119646	-0.289507	-0.861483	1.87884	0.904208	0	-0.077606	0.0522521	-0.320946	0.800284	0.24973	1.09766	-0.199571	-2.37477	-1.49842	-2.13841	-1.51132
490	ATP2B1	ATPase, Ca++ transporting, plasma membrane 1	-0.723224	-1.05839	-1.81791	-1.68584	-2.35926	-1.21328	-0.713962	-0.60964	1.63872	0.722407	-0.879706	-1.2066	1.20923	0.688158	-1.11902	-1.66402	-1.02063	-0.954639	0.698998	0.395504	-1.00238	-0.984996	1.47002	0.851014	2.96016	1.73861	1.06224	0.55254	-2.58055	-1.78763
491	ATP2B2	ATPase, Ca++ transporting, plasma membrane 2	2.78613	1.45931	1.09485	0.344644	0	0.178225	1.20794	1.09069	0	-0.532931	-2.38082	-2.57928	0	-0.968223	1.39593	0.769133	0	-0.300311	1.09548	0.663862	-0.636629	-0.754698	0.63831	0.10431	1.44559	0.16249	-2.70986	-1.69837	1.55099	0.794309
492	ATP2B3	ATPase, Ca++ transporting, plasma membrane 3	0.3539	-0.285631	0.929068	0.229075	-3.02877	-1.60816	1.72591	1.54895	1.69081	0.762309	0.295724	-0.13175	1.90967	1.64761	1.59524	0.961959	-2.4471	-1.86915	2.21536	1.42184	2.86326	1.449	0.299601	-0.199782	0.777608	-0.532633	-1.40583	-0.920224	1.20891	0.580527
493	ATP2B4	ATPase, Ca++ transporting, plasma membrane 4	1.73393	0.704436	0.739081	0.0966354	1.31396	0.953205	2.0711	1.85434	1.92373	0.940739	0.207179	-0.212718	1.36397	0.900116	1.88897	1.24614	3.18983	1.74468	0.156747	0.0284865	2.31222	1.10204	1.17687	0.587833	2.16179	0.907801	-0.0862664	-0.132803	-0.751363	-0.644512
495	ATP4A	ATPase, H+/K+ exchanging, alpha polypeptide	1.43086	0.487007	1.35509	0.526058	0.164995	0.27554	0.329483	0.313508	-1.5806	-1.74375	0.0489986	-0.357364	1.37915	0.920918	0.962969	0.350255	-1.64717	-1.35631	2.72015	1.7635	2.94988	1.50354	0.0356839	-0.436726	1.88616	0.620966	-1.8799	-1.20311	2.4484	1.35513
496	ATP4B	ATPase, H+/K+ exchanging, beta polypeptide	1.1753	0.303662	1.29903	0.486975	2.04555	1.3847	1.05817	0.958186	1.17996	0.370973	0	-0.40217	1.5175	1.11042	0.728504	0.123416	0	-0.300311	-1.24111	-0.917637	1.66997	0.697649	0	-0.468763	2.22319	0.971696	0.994768	0.51228	1.21848	0.58651
537	ATP6AP1	ATPase, H+ transporting, lysosomal accessory protein 1	2.20299	1.04095	-1.00669	-1.12034	0.914561	0.717638	-0.415684	-0.34575	2.68878	1.52681	1.39905	0.877169	0.531156	-0.240654	-0.815063	-1.36995	2.59329	1.36224	0.478658	0.246369	0.0929629	-0.295312	1.47263	0.853358	1.152	-0.143023	1.73581	0.954481	2.44642	1.35389
92270	ATP6AP1L	ATPase, H+ transporting, lysosomal accessory protein 1-like	-2.48871	-2.32499	0.661041	0.0422337	0.558892	0.507862	0	0.0220105	1.2043	0.389617	1.94719	1.37841	0.79419	0.119646	0	-0.581393	1.35091	0.565756	0	-0.077606	-0.636362	-0.75453	0.887012	0.327595	1.96016	0.697973	1.18014	0.622895	-1.22654	-0.941466
10159	ATP6AP2	ATPase, H+ transporting, lysosomal accessory protein 2	1.77141	0.731321	0.7087	0.0754571	-3.38452	-1.81799	-1.07692	-0.930753	0.316125	-0.290764	1.04801	0.556163	1.36397	0.900116	-0.234465	-0.808232	1.40188	0.598429	-1.3521	-0.992758	-0.837146	-0.880954	0.688523	0.149391	2.59243	1.35593	1.15366	0.607096	1.54803	0.792454
535	ATP6V0A1	ATPase, H+ transporting, lysosomal V0 subunit a1	1.5128	0.545794	0.480982	-0.0832853	0.922734	0.722459	-1.20587	-1.04483	1.2043	0.389617	0.589257	0.136667	1.01658	0.424276	0.888969	0.278662	1.34787	0.563807	-1.10276	-0.823999	-1.70282	-1.42602	0.303256	-0.196501	1.22319	-0.0689394	1.22699	0.650855	1.52412	0.777515
23545	ATP6V0A2	ATPase, H+ transporting, lysosomal V0 subunit a2	1.71866	0.693483	1.61732	0.708854	1.22632	0.901514	0.477624	0.44457	1.43394	0.565539	1.23243	0.724808	1.20923	0.688158	0.810966	0.203196	1.22121	0.482607	0	-0.077606	0.64114	0.049847	1.32864	0.724086	1.88616	0.620966	1.10432	0.577652	1.87063	0.994059
50617	ATP6V0A4	ATPase, H+ transporting, lysosomal V0 subunit a4	1.03444	0.202604	0.99888	0.277741	0.859495	0.68516	1.967	1.76224	1.26015	0.432408	0.982971	0.496694	1.1428	0.597167	1.68544	1.04922	2.53	1.32167	1.98016	1.26264	3.10755	1.60282	0.803398	0.252526	0.638232	-0.677672	1.34131	0.719073	1.31136	0.644556
538	ATP7A	ATPase, Cu++ transporting, alpha polypeptide	1.40248	0.466645	0.469154	-0.0915305	-0.901554	-0.353518	0.327784	0.312005	1.77218	0.824647	0.495464	0.0509001	1.20923	0.688158	-1.0072	-1.55583	-0.86235	-0.853163	-2.6657	-1.88186	0.312528	-0.157063	1.3622	0.754213	2.63823	1.4036	-0.646537	-0.467132	-3.28675	-2.22896
540	ATP7B	ATPase, Cu++ transporting, beta polypeptide	-0.925999	-1.20386	-1.06345	-1.1599	3.14402	2.03258	-2.84693	-2.4967	0.381869	-0.240401	0.588574	0.136043	0.531156	-0.240654	-2.64779	-3.14306	-0.993445	-0.937208	0.121511	0.00463763	0.376823	-0.11658	-2.39851	-2.62214	0	-1.34184	0.816183	0.405713	0.733156	0.283214
10396	ATP8A1	ATPase, aminophospholipid transporter (APLT), class I, type 8A, member 1	0.449478	-0.217062	1.18801	0.409582	-2.55707	-1.32995	1.2935	1.16638	-1.30039	-1.5291	1.0485	0.556618	0.79419	0.119646	1.10047	0.483287	0.853326	0.246755	-2.45783	-1.74116	-0.360939	-0.581111	1.11136	0.529014	0	-1.34184	-2.52062	-1.58545	1.22337	0.589567
51761	ATP8A2	ATPase, aminophospholipid transporter, class I, type 8A, member 2	-2.98112	-2.67826	1.21599	0.429085	-2.11203	-1.06746	0.637881	0.586351	0.923731	0.174691	-2.60324	-2.78266	0.79419	0.119646	0.943416	0.331339	-3.86802	-2.78009	0	-0.077606	1.2223	0.415773	1.24107	0.645471	1.22319	-0.0689394	0.592752	0.272386	-1.11864	-0.874039
5205	ATP8B1	ATPase, aminophospholipid transporter, class I, type 8B, member 1	0.971431	0.1574	0.180919	-0.292459	-4.79594	-2.65045	-0.0357041	-0.00957727	-0.099121	-0.608863	-1.13766	-1.44248	1.37915	0.920918	0.962969	0.350255	-1.4346	-1.22003	-1.75298	-1.26409	-2.19689	-1.73711	0.107424	-0.372319	1.88616	0.620966	1.14024	0.599086	-3.56365	-2.40201
57198	ATP8B2	ATPase, aminophospholipid transporter, class I, type 8B, member 2	2.37353	1.1633	2.79588	1.53043	0.918653	0.720052	-1.71338	-1.49384	1.52555	0.635712	1.44731	0.9213	1.90967	1.64761	1.68544	1.04922	0.902552	0.278314	-2.98763	-2.09976	2.14653	0.997713	1.71354	1.06964	2.99578	1.77568	2.98255	1.69845	3.15232	1.79503
148229	ATP8B3	ATPase, aminophospholipid transporter, class I, type 8B, member 3	-2.15466	-2.08533	0.821522	0.154105	-1.67128	-0.80751	-0.158884	-0.118556	-1.34938	-1.56662	1.39632	0.874674	-1.37897	-2.85711	1.2849	0.661713	-0.457085	-0.593348	0.785071	0.453761	-0.282858	-0.531947	1.3629	0.754845	2.84769	1.62156	1.6472	0.901603	-2.92376	-2.00212
79895	ATP8B4	ATPase, class I, type 8B, member 4	-2.80047	-2.54865	-2.21801	-1.96475	-2.57452	-1.34024	-2.45184	-2.14716	-2.3493	-2.33261	0	-0.40217	0.79419	0.119646	1.39593	0.769133	-3.20816	-2.35706	-2.27914	-1.62022	-0.284377	-0.532904	-1.80994	-2.09372	1.44559	0.16249	-2.97637	-1.85741	-2.62224	-1.81369
51374	ATRAID	all-trans retinoic acid-induced differentiation factor	2.07697	0.950536	1.1188	0.36134	0.994991	0.765076	0.393309	0.369976	1.32507	0.482138	0.676037	0.216022	1.20923	0.688158	1.10047	0.483287	2.13233	1.06672	2.36296	1.52174	2.44843	1.1878	1.47197	0.852773	0.652077	-0.663265	1.60257	0.874973	2.26104	1.23804
8455	ATRN	attractin	-1.84497	-1.86315	0.962511	0.252388	-0.232195	0.0412746	-2.63349	-2.30787	-1.03987	-1.32952	1.23287	0.725208	0.531156	-0.240654	-1.59216	-2.12176	1.99074	0.975951	2.28358	1.46801	2.60528	1.28657	0.302539	-0.197144	2.22319	0.971696	-1.75359	-1.12774	-1.91544	-1.37199
26033	ATRNL1	attractin-like 1	-0.556393	-0.938698	0.617157	0.0116421	-4.32642	-2.37353	-2.74223	-2.40408	-3.07236	-2.88651	-1.61707	-1.88087	0	-0.968223	-2.51854	-3.01801	-2.24214	-1.73775	-2.1594	-1.53918	1.56071	0.628852	1.28074	0.681079	0.808157	-0.500842	-3.53481	-2.19064	-2.39237	-1.67003
552	AVPR1A	arginine vasopressin receptor 1A	0.687638	-0.0462003	1.15703	0.387984	-2.50789	-1.30095	1.12818	1.02013	1.52555	0.635712	-1.48543	-1.7605	0	-0.968223	0.100473	-0.484188	0.17255	-0.189689	0.704434	0.399183	1.59414	0.649901	1.23954	0.644095	1.63823	0.362963	0.892312	0.451141	-1.65206	-1.20739
553	AVPR1B	arginine vasopressin receptor 1B	0.2726	-0.343958	2.95288	1.63987	1.0377	0.790266	0.361793	0.342093	1.25434	0.427953	1.34346	0.826339	1.19213	0.66474	0	-0.581393	2.49606	1.29991	-1.528	-1.11182	1.59928	0.653141	0	-0.468763	0.96016	-0.342662	1.74239	0.958405	3.05905	1.73674
554	AVPR2	arginine vasopressin receptor 2	1.55639	0.577066	1.52612	0.645278	1.10095	0.827573	0.00416122	0.025692	2.01193	1.0083	1.39905	0.877169	0.79419	0.119646	1.03336	0.418355	2.09835	1.04494	0.235593	0.0818529	2.74517	1.37465	1.17687	0.587833	1	-0.301203	0.560248	0.252989	1.42367	0.714743
558	AXL	AXL receptor tyrosine kinase	1.97786	0.879434	-2.11699	-1.89433	-1.70397	-0.826788	-0.424271	-0.353346	-2.11763	-2.15514	1.34387	0.826709	1.01658	0.424276	0.728504	0.123416	1.39305	0.592771	1.10189	0.668197	0.437822	-0.0781724	0.625934	0.0931991	3.03055	1.81186	1.09043	0.569363	1.34246	0.663991
10331	B3GNT3	UDP-GlcNAc:betaGal beta-1,3-N-acetylglucosaminyltransferase 3	0.486004	-0.190857	1.61651	0.708288	0.701406	0.591918	0	0.0220105	-0.784358	-1.13379	1.17399	0.67137	0	-0.968223	0.810966	0.203196	-1.86876	-1.49837	-0.984859	-0.744198	1.33639	0.487613	1.04009	0.465029	0.808157	-0.500842	1.70879	0.938355	2.54329	1.41443
2683	B4GALT1	UDP-Gal:betaGlcNAc beta 1,4- galactosyltransferase, polypeptide 1	1.65593	0.648475	0	-0.418577	0.558892	0.507862	0	0.0220105	2.05418	1.04067	1.04801	0.556163	1.20923	0.688158	0.448396	-0.147581	1.39894	0.596547	1.62939	1.02523	0.0513992	-0.321483	0.584963	0.0564147	2.28209	1.03298	0.37485	0.142358	1.55855	0.799033
23621	BACE1	beta-site APP-cleaving enzyme 1	0.850576	0.0706958	-0.428563	-0.717327	-1.72717	-0.840468	-2.993	-2.62593	0.934682	0.18308	0.676679	0.21661	1.87795	1.60416	0.962969	0.350255	-0.924305	-0.892882	-0.456024	-0.386261	-0.370739	-0.587282	0.628449	0.0954564	0.584963	-0.733106	-0.387847	-0.312765	1.27958	0.624693
575	BAI1	brain-specific angiogenesis inhibitor 1	-0.731587	-1.06439	0.865867	0.185018	1.44098	1.02812	0.517117	0.47951	3.5475	2.18462	0.0529648	-0.353737	2.10703	1.91795	2.54793	1.88367	-0.581623	-0.673189	0.296719	0.123226	4.3493	2.38469	2.10043	1.417	1.54512	0.26607	0.370754	0.139913	-0.596032	-0.547441
576	BAI2	brain-specific angiogenesis inhibitor 2	1.53912	0.56467	-0.158252	-0.528894	0.465847	0.452984	-0.673134	-0.573519	1.53757	0.644921	0.980891	0.494792	1.20923	0.688158	1.49902	0.868873	-0.761299	-0.788379	1.24642	0.766024	1.88951	0.835884	0.964191	0.396885	1.44559	0.16249	-1.71012	-1.1018	2.01556	1.08463
577	BAI3	brain-specific angiogenesis inhibitor 3	-1.58316	-1.67533	-1.7329	-1.62658	-4.30065	-2.35833	-1.18771	-1.02877	-4.3493	-3.86471	0.836501	0.362756	0	-0.968223	1.03336	0.418355	-2.13718	-1.67045	-3.5388	-2.47281	2.04739	0.93529	-2.66172	-2.85845	0.808157	-0.500842	-2.00104	-1.2754	-3.0468	-2.07901
25805	BAMBI	BMP and activin membrane-bound inhibitor	-1.57584	-1.67007	1.06416	0.323248	-2.49521	-1.29346	0	0.0220105	0	-0.532931	0.836501	0.362756	1.90967	1.64761	1.54793	0.916192	1.22014	0.481921	1.15198	0.702097	1.94672	0.871902	1.17768	0.588551	0.638232	-0.677672	0.699667	0.336185	0.855283	0.359536
4059	BCAM	basal cell adhesion molecule (Lutheran blood group)	1.54778	0.570886	1.57215	0.677364	-1.40826	-0.652375	1.30944	1.18049	2.06917	1.05215	0.911594	0.431424	1.66866	1.31748	0.387023	-0.206958	2.27585	1.15873	-0.851813	-0.654147	-1.2129	-1.11755	1.04009	0.465029	1.22319	-0.0689394	-2.24553	-1.42129	2.51239	1.39512
10134	BCAP31	B-cell receptor-associated protein 31	2.07097	0.946233	1.96491	0.951156	1.59049	1.1163	-0.0631204	-0.0338328	2.73312	1.56077	1.63562	1.09349	1.53116	1.12913	1.64104	1.00627	2.54212	1.32944	1.80268	1.14252	2.8415	1.4353	1.52514	0.900505	1.90689	0.642539	1.73581	0.954481	2.41121	1.33188
623	BDKRB1	bradykinin receptor B1	1.39289	0.459768	1.40625	0.561718	-2.01294	-1.00902	0	0.0220105	1.75992	0.815253	1.11214	0.614807	0	-0.968223	0	-0.581393	1.99658	0.979694	0.805008	0.467255	1.08833	0.331418	1.36149	0.753581	2.16179	0.907801	-2.39869	-1.51269	0.779343	0.312078
624	BDKRB2	bradykinin receptor B2	0.293359	-0.329065	-1.66147	-1.57679	0	0.178225	-0.82199	-0.705214	1.36847	0.515383	1.04801	0.556163	0	-0.968223	0	-0.581393	1.99658	0.979694	0.405647	0.196952	0.459851	-0.0643019	1.30254	0.700654	0.638232	-0.677672	1.06224	0.55254	-0.637747	-0.57351
146227	BEAN1	brain expressed, associated with NEDD4, 1	1.68764	0.671224	0	-0.418577	0	0.178225	0	0.0220105	1.31951	0.477879	0	-0.40217	1.01658	0.424276	1.03336	0.418355	0.782674	0.20146	0	-0.077606	-0.553899	-0.702608	0.293336	-0.205407	1.33867	0.0512303	0.816183	0.405713	0	-0.17496
7439	BEST1	bestrophin 1	-0.570734	-0.948986	1.12696	0.367024	0.471429	0.456276	0.450742	0.420787	1.76402	0.818393	1.28901	0.77655	1.5175	1.11042	0.100473	-0.484188	1.34787	0.563807	-0.698998	-0.550716	1.10153	0.339728	0.301071	-0.198463	1.09766	-0.199571	-1.0373	-0.70031	1.34246	0.663991
54831	BEST2	bestrophin 2	0	-0.539528	0.741281	0.0981692	-1.75076	-0.854384	-1.29495	-1.12365	0.994797	0.229131	0	-0.40217	1.36397	0.900116	1.226	0.604734	0	-0.300311	1.15198	0.702097	0.528224	-0.0212505	0	-0.468763	1.33867	0.0512303	0.994768	0.51228	1.74967	0.918468
144453	BEST3	bestrophin 3	2.24089	1.06814	-0.537794	-0.793472	0.636393	0.553573	1.03654	0.939045	-0.685711	-1.05822	2.01535	1.44074	-1.79077	-3.42119	1.226	0.604734	1.82736	0.871205	2.58909	1.67479	1.84179	0.805836	0.712431	0.170856	3.47112	2.27033	-0.624656	-0.454075	0.484777	0.127994
266675	BEST4	bestrophin 4	1.7415	0.709869	1.35402	0.525312	-2.44182	-1.26198	0.980702	0.889649	0.998281	0.2318	0.676037	0.216022	1.20923	0.688158	0.728504	0.123416	-1.73765	-1.41432	0.763754	0.439333	2.56266	1.25973	-1.30999	-1.64487	1.33867	0.0512303	1.25217	0.665878	1.09861	0.5116
51283	BFAR	bifunctional apoptosis regulator	-0.800974	-1.11417	0.652179	0.0360562	1.79113	1.23464	0.547488	0.506379	1.38187	0.525647	1.7588	1.20614	0.79419	0.119646	0.728504	0.123416	1.45393	0.631802	-1.75819	-1.26762	-0.275067	-0.527041	2.10927	1.42493	1.63823	0.362963	1.38627	0.745897	1.05508	0.484398
10904	BLCAP	bladder cancer associated protein	2.26211	1.08336	1.955	0.944252	4.05098	2.56752	1.0357	0.93831	2.53757	1.41097	1.49546	0.965336	0.437877	-0.368425	1.1646	0.545331	2.09821	1.04485	0.905895	0.53554	1.29245	0.459942	1.41745	0.803822	1.22319	-0.0689394	3.01561	1.71817	2.27264	1.24529
657	BMPR1A	bone morphogenetic protein receptor, type IA	-1.13416	-1.3532	0.156076	-0.309776	-4.22118	-2.31146	-1.46762	-1.27641	0.406401	-0.221608	-0.0480054	-0.446068	1.37915	0.920918	0.347923	-0.244786	-1.74518	-1.41915	-1.80554	-1.29967	-1.36731	-1.21477	-1.20723	-1.55261	1.22319	-0.0689394	-1.34215	-0.882225	-0.715816	-0.622298
658	BMPR1B	bone morphogenetic protein receptor, type IB	0	-0.539528	0.479377	-0.0844036	-2.33862	-1.20111	0.82199	0.749235	1.27172	0.441265	0.289854	-0.137117	1.01658	0.424276	0.888969	0.278662	-0.535984	-0.64393	1.43146	0.891266	-0.337405	-0.566293	0.526399	0.00383619	1.09766	-0.199571	1.56659	0.853502	-1.41801	-1.06113
659	BMPR2	bone morphogenetic protein receptor, type II (serine/threonine kinase)	0.718665	-0.0239408	-3.2464	-2.68164	-5.09571	-2.82726	-0.0578039	-0.0291292	1.41842	0.55365	-1.25109	-1.54621	1.20923	0.688158	0.641041	0.0387982	-0.59046	-0.678854	-0.717722	-0.563389	0.593918	0.0201134	-0.905482	-1.2817	1.72569	0.45398	-1.72918	-1.11317	-1.09924	-0.861915
91653	BOC	BOC cell adhesion associated, oncogene regulated	1.56496	0.583208	-1.61217	-1.54242	-2.59355	-1.35146	0.309857	0.296144	1.43106	0.563329	-1.49022	-1.76488	0.209228	-0.681626	0.962969	0.350255	-2.39083	-1.83307	3.14766	2.05285	2.19023	1.02523	1.17768	0.588551	1.54512	0.26607	1.35174	0.725297	1.84913	0.980626
25798	BRI3	brain protein I3	1.29336	0.388359	2.04905	1.00981	2.48968	1.64665	3.25884	2.90514	2.4106	1.31371	1.49656	0.966335	1.37915	0.920918	2.13289	1.48213	2.52462	1.31822	1.11913	0.679864	2.09561	0.965649	2.14244	1.45472	2.03055	0.771223	2.20376	1.23372	1.6143	0.833875
283870	BRICD5	BRICHOS domain containing 5	0.971431	0.1574	2.99813	1.67142	1.05267	0.799097	0.210052	0.207846	1.07248	0.288637	0.676679	0.21661	1.20923	0.688158	1.03336	0.418355	1.75062	0.822009	1.10276	0.668787	0.94111	0.238722	-0.518011	-0.933833	1.72569	0.45398	1.59275	0.869113	-1.97265	-1.40774
680	BRS3	bombesin-like receptor 3	1.5304	0.558416	0	-0.418577	1.10095	0.827573	0.80914	0.737866	1.75581	0.812104	-1.87607	-2.11771	0.209228	-0.681626	-0.566139	-1.12912	-2.11756	-1.65788	-0.415483	-0.358822	0.999166	0.275277	1.17687	0.587833	-0.638232	-2.00601	1.0243	0.529899	-1.70564	-1.24087
682	BSG	basigin (Ok blood group)	1.05889	0.220148	1.18823	0.409734	1.05639	0.801291	2.00843	1.79889	0.387194	-0.236322	0.0489986	-0.357364	1.20923	0.688158	2.34148	1.68393	1.04501	0.369643	0.0179162	-0.0654796	-3.13749	-2.32936	0.526399	0.00383619	2.44559	1.20313	1.28463	0.685248	0.90151	0.388425
7809	BSND	barttin CLCNK-type chloride channel accessory beta subunit	0.313823	-0.314384	1.54974	0.661745	0.558892	0.507862	-0.152783	-0.113158	0.381869	-0.240401	0.836501	0.362756	1.66866	1.31748	0.728504	0.123416	0.482151	0.00879519	1.36296	0.844902	2.38325	1.14677	1.08809	0.508123	1.09766	-0.199571	1.49847	0.812852	1.69918	0.886917
684	BST2	bone marrow stromal cell antigen 2	0.623508	-0.0922089	0.891273	0.202729	0.859495	0.68516	1.15278	1.04189	1.2043	0.389617	0	-0.40217	1.5175	1.11042	1.64104	1.00627	-1.22371	-1.08483	-0.962032	-0.728748	1.1774	0.387502	0.418129	-0.0933677	2.22319	0.971696	1.29678	0.692498	-0.420258	-0.437594
685	BTC	betacellulin	1.49499	0.533015	1.35447	0.525623	0.885346	0.700407	1.17035	1.05743	0.920062	0.17188	-1.82574	-2.07169	0.79419	0.119646	0.341481	-0.251019	0.936961	0.300373	0.999424	0.598844	-0.533425	-0.689717	0.302539	-0.197144	0.223194	-1.10957	0.239637	0.0616722	1.30239	0.638947
151888	BTLA	B and T lymphocyte associated	-1.818	-1.84381	0.929852	0.229621	-1.72824	-0.841102	1.49577	1.34533	-0.394757	-0.835334	0.289854	-0.137117	0.209228	-0.681626	0	-0.581393	1.1622	0.444773	2.83572	1.84172	2.57454	1.26721	0.525141	0.00270743	1.22319	-0.0689394	0	-0.0813257	0.0617116	-0.136394
696	BTN1A1	butyrophilin, subfamily 1, member A1	1.11827	0.262747	0.214808	-0.268835	-1.51624	-0.716065	-1.55685	-1.35535	0.852835	0.120382	0.395929	-0.0401189	1.20923	0.688158	0.100473	-0.484188	-1.16975	-1.05023	-2.0276	-1.44996	1.24843	0.432229	0	-0.468763	0.96016	-0.342662	-1.79493	-1.15241	-1.2354	-0.947002
11120	BTN2A1	butyrophilin, subfamily 2, member A1	2.3539	1.14922	1.87657	0.889576	-1.07699	-0.456992	-0.652077	-0.554889	0.852835	0.120382	-1.54432	-1.81435	1.01658	0.424276	1.39593	0.769133	1.78996	0.847231	-0.960311	-0.727583	1.22803	0.419384	1.3629	0.754845	0.808157	-0.500842	2.66951	1.51164	-0.925867	-0.753566
10385	BTN2A2	butyrophilin, subfamily 2, member A2	1.59034	0.60142	-0.912562	-1.05472	0.922734	0.722459	0	0.0220105	1.07578	0.291166	1.04801	0.556163	0.531156	-0.240654	1.59524	0.961959	-2.2456	-1.73996	0.0683987	-0.0313109	2.25221	1.06426	0.526399	0.00383619	0.638232	-0.677672	2.84282	1.61506	-1.2354	-0.947002
11119	BTN3A1	butyrophilin, subfamily 3, member A1	2.23017	1.06045	1.27273	0.468644	-1.72903	-0.84157	0.289507	0.27814	1.43908	0.569474	0.758499	0.291428	1.20923	0.688158	1.34148	0.716456	1.3901	0.590878	0	-0.077606	2.25221	1.06426	0.966971	0.399381	1.54512	0.26607	-0.00867786	-0.086504	1.41537	0.709556
11118	BTN3A2	butyrophilin, subfamily 3, member A2	2.04672	0.928837	1.35373	0.525108	0.855231	0.682645	-0.566219	-0.47893	1.14304	0.342694	0.395929	-0.0401189	1.37915	0.920918	1.49902	0.868873	1.33257	0.553995	-0.960311	-0.727583	1.60252	0.655176	0.966971	0.399381	1.63823	0.362963	2.34654	1.31892	1.14982	0.5436
10384	BTN3A3	butyrophilin, subfamily 3, member A3	1.94544	0.856174	1.12673	0.366865	0.548366	0.501654	-0.263034	-0.210699	1.38453	0.527688	0.588574	0.136043	1.20923	0.688158	1.39593	0.769133	-1.50216	-1.26335	-2.13902	-1.52538	1.78645	0.770992	0.806507	0.255317	1.44559	0.16249	2.61591	1.47966	1.63956	0.84966
10917	BTNL3	butyrophilin-like 3	0.607019	-0.104038	1.21631	0.429309	0	0.178225	1.49577	1.34533	1.26595	0.436845	3.00796	2.34842	1.37915	0.920918	0	-0.581393	0.669933	0.129182	1.32976	0.822432	2.2223	1.04542	0.805471	0.254387	1.44559	0.16249	0.539947	0.240876	1.2564	0.61021
79908	BTNL8	butyrophilin-like 8	0.733932	-0.0129881	0.964269	0.253613	-0.641354	-0.20005	0.550554	0.509092	0.484204	-0.162007	0.701837	0.239615	1.20923	0.688158	0	-0.581393	-1.78709	-1.44601	0.708734	0.402094	1.49102	0.58497	1.52577	0.90107	1.88616	0.620966	-2.21561	-1.40344	-1.1416	-0.888385
153579	BTNL9	butyrophilin-like 9	1.47696	0.520077	0.998507	0.277481	0.994991	0.765076	1.43629	1.29271	1.13989	0.34028	3.24093	2.56145	0	-0.968223	1.226	0.604734	1.0006	0.341174	-1.63186	-1.18211	1.41092	0.534537	1.17768	0.588551	1.63823	0.362963	-2.40193	-1.51463	1.2564	0.61021
11149	BVES	blood vessel epicardial substance	1.82229	0.767824	2.04785	1.00897	-2.44204	-1.26211	0.187707	0.188077	1.00176	0.234462	1.11261	0.615241	1.01658	0.424276	1.1646	0.545331	0.0350469	-0.277843	0.67636	0.380182	1.94489	0.87075	-1.85774	-2.13664	1.33867	0.0512303	-2.63912	-1.65616	-1.46665	-1.09152
414152	C10orf105	chromosome 10 open reading frame 105	1.28302	0.380939	1.24448	0.448949	0.265992	0.335109	0	0.0220105	0.37116	-0.248605	0	-0.40217	1.01658	0.424276	1.226	0.604734	1.02366	0.355954	0	-0.077606	0.718653	0.0986528	0	-0.468763	1.22319	-0.0689394	0.0622371	-0.0441871	1.66439	0.865174
221060	C10orf111	chromosome 10 open reading frame 111	2.412	1.1909	1.70302	0.768595	0.93086	0.727252	0	0.0220105	1.48669	0.605943	0.676037	0.216022	1.20923	0.688158	1.54793	0.916192	0.874615	0.260404	-1.40417	-1.028	1.99588	0.902858	1.10968	0.527509	1.09766	-0.199571	1.7591	0.968378	1.92157	1.0259
170371	C10orf128	chromosome 10 open reading frame 128	1.00957	0.184759	0.527241	-0.0510377	0.558892	0.507862	0	0.0220105	0.845117	0.114469	0.676037	0.216022	1.01658	0.424276	1.39593	0.769133	0.949054	0.308126	0	-0.077606	0	-0.353846	1.36149	0.753581	1.63823	0.362963	0	-0.0813257	0.733156	0.283214
219738	C10orf35	chromosome 10 open reading frame 35	1.65593	0.648475	1.52707	0.64594	0.473326	0.457395	-0.512133	-0.43108	1.43394	0.565539	1.04801	0.556163	1.20923	0.688158	1.34148	0.716456	1.50963	0.667509	-1.16829	-0.868352	-0.226682	-0.496576	1.5752	0.945451	1.09766	-0.199571	0.477275	0.203477	1.41537	0.709556
64115	C10orf54	chromosome 10 open reading frame 54	0.793433	0.0296994	1.59479	0.693146	0.784415	0.640877	1.81998	1.63216	0.761972	0.050776	0.0995357	-0.311151	1.20923	0.688158	1.03336	0.418355	0.787172	0.204344	-0.744531	-0.581534	0.852232	0.182761	1.03921	0.464238	0.638232	-0.677672	0	-0.0813257	1.03472	0.471674
53838	C11orf24	chromosome 11 open reading frame 24	2.44485	1.21446	2.54876	1.35816	0.0563912	0.211484	0.409526	0.384323	2.94533	1.72334	1.23243	0.724808	1.89917	1.63323	1.49902	0.868873	1.78492	0.844002	-0.504334	-0.41896	1.47638	0.575753	2.07144	1.39097	1.54512	0.26607	0.230646	0.0563068	1.62874	0.842894
790955	C11orf83	chromosome 11 open reading frame 83	1.2726	0.373466	0.894192	0.204763	0.471429	0.456276	0	0.0220105	1.52313	0.63386	0.0480054	-0.358272	1.19213	0.66474	0.728504	0.123416	1.56325	0.701889	0	-0.077606	0.0649375	-0.312958	1.04009	0.465029	0.96016	-0.342662	1.28463	0.685248	1.51239	0.770183
399947	C11orf87	chromosome 11 open reading frame 87	0.430862	-0.230417	0	-0.418577	0.636393	0.553573	0	0.0220105	0.381869	-0.240401	0	-0.40217	0.724556	0.0242626	1.226	0.604734	-2.48092	-1.89082	0	-0.077606	0.714364	0.0959522	-0.0232698	-0.489655	0.289507	-1.04057	1.80368	0.994982	0	-0.17496
79794	C12orf49	chromosome 12 open reading frame 49	2.26211	1.08336	1.24574	0.449827	1.19265	0.881654	0.514248	0.476972	1.58903	0.684343	0.173536	-0.243483	0.209228	-0.681626	1.39593	0.769133	1.61496	0.735036	0.0720795	-0.0288196	0.621322	0.0373685	1.84531	1.18795	2.16179	0.907801	1.23964	0.6584	1.27958	0.624693
56967	C14orf132	chromosome 14 open reading frame 132	0.718665	-0.0239408	-0.280434	-0.614067	0.968624	0.749525	-1.51213	-1.31579	1.18608	0.375664	0.588574	0.136043	1.20923	0.688158	-0.341481	-0.911767	1.61749	0.736657	0.405647	0.196952	-0.960859	-0.95885	1.57581	0.945996	1.33867	0.0512303	0.351744	0.128569	1.45663	0.735337
400258	C14orf180	chromosome 14 open reading frame 180	0	-0.539528	0.701336	0.0703237	0.0489435	0.207092	0	0.0220105	0	-0.532931	0.495464	0.0509001	0.79419	0.119646	0	-0.581393	0	-0.300311	0.762652	0.438588	1.16688	0.380876	0.0374487	-0.435142	1.63823	0.362963	0.519358	0.228589	1.3943	0.696383
145407	C14orf37	chromosome 14 open reading frame 37	-0.987927	-1.24829	0.640311	0.0277832	-2.65173	-1.38578	-1.24157	-1.07642	2.10173	1.07709	0.758499	0.291428	1.20923	0.688158	0.100473	-0.484188	1.98096	0.96968	1.0162	0.610196	0	-0.353846	0.887991	0.328473	1.72569	0.45398	-1.60407	-1.03852	-1.35407	-1.02116
123591	C15orf27	chromosome 15 open reading frame 27	0.749038	-0.00215004	0.857216	0.178987	0.641354	0.556499	0.749481	0.685085	1.21032	0.394229	1.04801	0.556163	1.01658	0.424276	1.226	0.604734	1.09821	0.403753	0	-0.077606	1.22844	0.419638	1.47393	0.854529	1.54512	0.26607	1.34438	0.720902	1.23285	0.59549
84419	C15orf48	chromosome 15 open reading frame 48	1.62351	0.625215	-0.299046	-0.627041	-0.123052	0.105648	-2.10901	-1.84385	1.27172	0.441265	0.759106	0.291983	1.01658	0.424276	0	-0.581393	0.769569	0.193058	-0.348716	-0.313631	-1.63156	-1.38115	1.03921	0.464238	0.96016	-0.342662	1.21424	0.643245	1.01288	0.458024
730094	C16orf52	chromosome 16 open reading frame 52	2.23554	1.0643	2.81044	1.54058	0.855231	0.682645	0.599297	0.552215	1.59134	0.686112	0.837076	0.363282	0.531156	-0.240654	1.2849	0.661713	1.56587	0.703569	0	-0.077606	1.32251	0.47887	0.886033	0.326716	1.22319	-0.0689394	1.28463	0.685248	1.31136	0.644556
283897	C16orf54	chromosome 16 open reading frame 54	1.5128	0.545794	-0.533369	-0.790387	0.537763	0.495401	0.450742	0.420787	1.13989	0.34028	1.39632	0.874674	0.79419	0.119646	0.888969	0.278662	0.298081	-0.109212	0.558785	0.300602	-0.0431216	-0.380998	0.0374487	-0.435142	0.638232	-0.677672	-1.82346	-1.16943	1.62154	0.838396
64755	C16orf58	chromosome 16 open reading frame 58	2.08889	0.95909	3.11172	1.7506	1.85523	1.27245	-0.844051	-0.724731	-0.33454	-0.789205	1.91078	1.34511	1.01658	0.424276	1.1646	0.545331	2.37513	1.22238	1.10276	0.668787	-0.983064	-0.972831	0.887012	0.327595	1.11548	-0.181033	1.0764	0.560993	1.77714	0.935635
146378	C16orf92	chromosome 16 open reading frame 92	1.99062	0.888593	2.09421	1.0413	-2.32193	-1.19126	0	0.0220105	0	-0.532931	0	-0.40217	1.53116	1.12913	0	-0.581393	1.44257	0.624519	0	-0.077606	0	-0.353846	1.03921	0.464238	0.223194	-1.10957	0.0904284	-0.0273646	1.3943	0.696383
79415	C17orf62	chromosome 17 open reading frame 62	2.10659	0.97179	2.56529	1.36968	1.51041	1.06907	0.0763472	0.0895557	1.38453	0.527688	1.34909	0.83149	1.20923	0.688158	1.99859	1.3522	2.39305	1.23387	0.736781	0.421077	0.29385	-0.168824	1.66983	1.03041	1.68806	0.414812	1.86897	1.03394	1.74645	0.916458
201243	C17orf74	chromosome 17 open reading frame 74	-0.564415	-0.944453	0.89553	0.205695	-1.9203	-0.954381	0.325211	0.309728	-2.59674	-2.52216	-2.17546	-2.39149	1.19213	0.66474	0.341481	-0.251019	0.713119	0.156868	-0.0683987	-0.123901	1.04227	0.302415	-0.411818	-0.838493	1.80816	0.539793	-2.8707	-1.79435	-1.3258	-1.0035
284099	C17orf78	chromosome 17 open reading frame 78	2.31382	1.12046	0.821663	0.154203	0.906342	0.712791	-0.977019	-0.842369	1.58903	0.684343	0.398269	-0.037979	1.37915	0.920918	0.888969	0.278662	1.01984	0.353507	-1.3287	-0.976926	-1.10808	-1.05155	0.966971	0.399381	0	-1.34184	0.908237	0.460644	1.92157	1.0259
55028	C17orf80	chromosome 17 open reading frame 80	3.23822	1.78365	2.60812	1.39954	0.778509	0.637394	0.0776391	0.0906987	2.00349	1.00184	0.323567	-0.106289	0.531156	-0.240654	1.96297	1.31773	2.5777	1.35225	2.61825	1.69453	-0.0749795	-0.401057	1.66983	1.03041	2.76751	1.53814	1.93738	1.07476	2.15182	1.16979
147685	C19orf18	chromosome 19 open reading frame 18	2.25154	1.07578	1.53871	0.654058	-3.19396	-1.70559	-0.841502	-0.722476	-1.28345	-1.51612	1.0485	0.556618	1.79419	1.48943	-0.893085	-1.44543	1.4652	0.639028	1.41818	0.882277	0.208512	-0.222557	1.62476	0.989944	1.54512	0.26607	0.477275	0.203477	1.29776	0.636053
55009	C19orf24	chromosome 19 open reading frame 24	0	-0.539528	0.604448	0.00278319	0.923702	0.72303	1.72806	1.55085	0.856679	0.123326	0.289013	-0.137886	1.20923	0.688158	1.59524	0.961959	0.883044	0.265807	-0.231125	-0.23404	-3.17024	-2.34998	1.04097	0.465819	2.22319	0.971696	1.35174	0.725297	0.536843	0.160532
255057	C19orf26	chromosome 19 open reading frame 26	0.864516	0.0806961	1.06535	0.324077	0.793357	0.646151	1.14704	1.03681	0.774217	0.0601563	0.495464	0.0509001	0.79419	0.119646	2.1646	1.51281	-1.18422	-1.05952	-0.457571	-0.387308	-1.57534	-1.34576	0.719044	0.176793	2.03055	0.771223	1.75029	0.963122	1.05251	0.482789
255809	C19orf38	chromosome 19 open reading frame 38	1.486	0.526567	0.524823	-0.0527237	0	0.178225	0	0.0220105	0.912696	0.166238	0.836501	0.362756	1.5175	1.11042	1.39593	0.769133	0.800582	0.212941	0	-0.077606	2.49257	1.21559	0	-0.468763	2.68263	1.4498	0.37485	0.142358	2.68357	1.5021
257044	C1orf101	chromosome 1 open reading frame 101	1.63981	0.63691	3.60401	2.09377	1.70994	1.18676	1.69203	1.51897	1.75581	0.812104	1.23287	0.725208	1.77135	1.45814	1.64104	1.00627	2.88004	1.54608	1.45298	0.905827	2.65138	1.31559	1.36149	0.753581	1.80816	0.539793	2.31922	1.30262	2.33582	1.28477
79762	C1orf115	chromosome 1 open reading frame 115	1.38324	0.452845	3.07753	1.72676	0.448969	0.443029	0.354778	0.335887	1.62526	0.712099	0.0785776	-0.330316	1.65625	1.30048	1.59524	0.961959	3.27184	1.79726	0.10601	-0.00585421	1.47602	0.575529	0.783237	0.234425	1.33867	0.0512303	1.40175	0.755138	2.36861	1.30527
54991	C1orf159	chromosome 1 open reading frame 159	1.4587	0.506976	1.3506	0.522922	-1.09735	-0.468997	0.251105	0.244166	1.26015	0.432408	1.23243	0.724808	1.53116	1.12913	0.341481	-0.251019	1.98096	0.96968	-1.4106	-1.03235	0.412475	-0.0941321	1.10968	0.527509	2.16179	0.907801	1.92327	1.06634	1.55099	0.794309
128346	C1orf162	chromosome 1 open reading frame 162	0.807932	0.0401017	0.21695	-0.267342	0.372364	0.397847	-0.421697	-0.35107	0.593645	-0.0781707	1.04801	0.556163	1.01658	0.424276	0.448396	-0.147581	0.796126	0.210084	-2.08568	-1.48928	-1.09105	-1.04083	1.04097	0.465819	1.09766	-0.199571	-1.85818	-1.19016	1.45663	0.735337
284546	C1orf185	chromosome 1 open reading frame 185	1.47696	0.520077	1.2449	0.449242	-2.32193	-1.19126	0	0.0220105	0.489165	-0.158207	0.676037	0.216022	1.79419	1.48943	1.64104	1.00627	1.08366	0.394423	0	-0.077606	1.59572	0.650896	1.11052	0.528262	2.49621	1.25581	0	-0.0813257	0.444331	0.102718
440712	C1orf186	chromosome 1 open reading frame 186	1.12986	0.271061	3.18457	1.80138	1.62892	1.13897	0.130731	0.137669	1.71853	0.783546	1.28901	0.77655	1.5175	1.11042	0	-0.581393	1.92492	0.933751	1.19957	0.734308	0.0789522	-0.304134	0.523883	0.00157769	0	-1.34184	-0.794934	-0.555684	-0.0173164	-0.185781
149466	C1orf210	chromosome 1 open reading frame 210	2.80793	1.47495	0.355463	-0.170784	0.372364	0.397847	0.82199	0.749235	1.53517	0.643085	0.588574	0.136043	1.37915	0.920918	0.641041	0.0387982	1.82501	0.8697	1.23097	0.755566	2.50752	1.22501	-0.418129	-0.844159	0.808157	-0.500842	1.91613	1.06208	2.2887	1.25533
643988	C1orf233	chromosome 1 open reading frame 233	0	-0.539528	0	-0.418577	0	0.178225	0	0.0220105	0	-0.532931	0	-0.40217	0	-0.968223	0	-0.581393	0	-0.300311	0	-0.077606	1.11029	0.345248	0	-0.468763	0	-1.34184	0	-0.0813257	0	-0.17496
729059	C1orf234	chromosome 1 open reading frame 234	0	-0.539528	NA	NA	NA	NA	NA	NA	0	-0.532931	0	-0.40217	0	-0.968223	NA	NA	0	-0.300311	0	-0.077606	0	-0.353846	0	-0.468763	0	-1.34184	NA	NA	0	-0.17496
54953	C1orf27	chromosome 1 open reading frame 27	3.02516	1.6308	4.11509	2.45004	2.36938	1.5757	-0.137504	-0.0996404	2.37519	1.28658	1.11261	0.615241	0.660976	-0.0628288	0.888969	0.278662	4.22305	2.40708	2.7424	1.77856	2.39941	1.15694	0.679394	0.141195	2.33867	1.09187	2.15437	1.20424	3.39327	1.94561
25912	C1orf43	chromosome 1 open reading frame 43	3.74904	2.15012	1.35365	0.525052	2.10993	1.42267	0.912066	0.828926	0.0263721	-0.512729	-1.61546	-1.8794	0.209228	-0.681626	1.10047	0.483287	3.53751	1.96758	3.35229	2.19136	2.34152	1.12049	2.23916	1.54155	3.49621	2.29644	3.18014	1.81635	0.952336	0.420188
375057	C1orf95	chromosome 1 open reading frame 95	1.04672	0.211413	0.0331669	-0.395456	0.979404	0.755883	1.29406	1.16688	0.459141	-0.181207	0.981412	0.495268	0.139594	-0.777009	1.226	0.604734	3.14653	1.71693	0.606234	0.332717	-0.393074	-0.601345	0.679741	0.141506	0.808157	-0.500842	2.1694	1.21322	2.09342	1.13329
114904	C1QTNF6	C1q and tumor necrosis factor related protein 6	1.18644	0.311655	0.702407	0.0710699	0.636393	0.553573	-0.192645	-0.148425	1.20731	0.391925	0.910502	0.430425	1.37915	0.920918	0.810966	0.203196	1.70363	0.791886	-2.5103	-1.77668	0.908411	0.218134	0.806507	0.255317	0.96016	-0.342662	0.985329	0.506647	0.342462	0.0390565
55969	C20orf24	chromosome 20 open reading frame 24	2.94544	1.5736	2.97392	1.65454	4.56964	2.87343	1.33856	1.20625	2.19825	1.15103	2.08043	1.50025	0.531156	-0.240654	1.68544	1.04922	1.98684	0.973448	2.43112	1.56787	1.88616	0.833769	1.80495	1.15172	3.09766	1.8817	2.31481	1.29999	3.15737	1.79819
25775	C22orf24	chromosome 22 open reading frame 24	1.99062	0.888593	0.520254	-0.0559085	1.32325	0.958685	0.596698	0.549916	1.3792	0.523602	0.758499	0.291428	0.79419	0.119646	1.49902	0.868873	1.51235	0.669253	-1.42822	-1.04428	1.14894	0.369585	1.04097	0.465819	1.44559	0.16249	2.04339	1.13802	1.97644	1.06018
9854	C2CD2L	C2CD2-like	1.79343	0.747123	-1.22181	-1.2703	0.265992	0.335109	0.0771226	0.0902418	0	-0.532931	1.44693	0.920956	2.08867	1.8928	1.81097	1.17067	1.74601	0.819052	0.965713	0.576027	0.144785	-0.262683	1.62417	0.989417	-1	-2.38247	-0.483361	-0.36976	1.36431	0.677641
339804	C2orf74	chromosome 2 open reading frame 74	1.94544	0.856174	1.12696	0.367024	-1.94361	-0.968128	0	0.0220105	1.5844	0.680797	1.17399	0.67137	1.20923	0.688158	0.962969	0.350255	1.1622	0.444773	1.88464	1.198	0.79244	0.145112	1.17687	0.587833	1.33867	0.0512303	0.832967	0.415728	2.16983	1.18104
389084	C2orf82	chromosome 2 open reading frame 82	-0.556393	-0.938698	0	-0.418577	0	0.178225	0	0.0220105	0.686754	-0.00684445	1.04999	0.557979	0.531156	-0.240654	-0.652077	-1.21226	1.79389	0.849751	0	-0.077606	0	-0.353846	0	-0.468763	-1.44559	-2.84617	0	-0.0813257	0.00721957	-0.170448
56918	C2orf83	chromosome 2 open reading frame 83	0.399096	-0.253207	0.328227	-0.189771	0.378319	0.40136	0	0.0220105	0	-0.532931	0	-0.40217	0.209228	-0.681626	1.1646	0.545331	0	-0.300311	0	-0.077606	0	-0.353846	0.887991	0.328473	3.20343e-16	-1.34184	1.81618	1.00244	-1.76019	-1.27496
719	C3AR1	complement component 3a receptor 1	1.57347	0.589315	1.57148	0.676897	-2.1459	-1.08744	0.0462568	0.0629344	-0.983529	-1.28636	0.910502	0.430425	1.37915	0.920918	2.2849	1.62919	1.55537	0.696832	-1.65021	-1.19453	2.45276	1.19053	1.47393	0.854529	1.88616	0.620966	0.539947	0.240876	-2.1642	-1.52744
51161	C3orf18	chromosome 3 open reading frame 18	1.31382	0.40304	-0.584517	-0.826042	0.863746	0.687667	-0.907724	-0.781063	0.146186	-0.420946	-2.48119	-2.67106	0.531156	-0.240654	-1.16993	-1.71327	0.520474	0.0333638	-1.29105	-0.951438	-0.8988	-0.919774	0.526399	0.00383619	0.638232	-0.677672	1.0764	0.560993	1.6143	0.833875
339883	C3orf35	chromosome 3 open reading frame 35	1.96498	0.870193	0	-0.418577	-2.65643	-1.38856	0.0357041	0.0535983	0	-0.532931	-1.82941	-2.07505	1.37915	0.920918	-1.30345	-1.84245	-0.829199	-0.83191	0.785071	0.453761	0.277132	-0.179351	0	-0.468763	1.54512	0.26607	1.56659	0.853502	0.23285	-0.0294438
79669	C3orf52	chromosome 3 open reading frame 52	1.75653	0.720651	0.819973	0.153025	0.93086	0.727252	0.632488	0.58158	3.00512	1.76913	0	-0.40217	1.20923	0.688158	0.226004	-0.36274	1.2886	0.525806	2.28495	1.46894	2.01985	0.917949	1.84732	1.18976	2.03055	0.771223	0.799203	0.39558	1.33368	0.658502
401097	C3orf80	chromosome 3 open reading frame 80	0.878321	0.0906007	0.091939	-0.354486	0	0.178225	0	0.0220105	2.90135	1.68964	0	-0.40217	0	-0.968223	0	-0.581393	0.335867	-0.0849871	3.93258	2.58412	3.23462	1.68283	0.401781	-0.108045	0	-1.34184	0	-0.0813257	1.27015	0.618803
401152	C4orf3	chromosome 4 open reading frame 3	1.03444	0.202604	0.479913	-0.0840305	0	0.178225	0	0.0220105	0.593645	-0.0781707	0.396709	-0.0394052	0.531156	-0.240654	-0.584963	-1.14733	0.961046	0.315814	0	-0.077606	0	-0.353846	-1.53823	-1.84978	1	-0.301203	0.908237	0.460644	-0.23285	-0.320476
132720	C4orf32	chromosome 4 open reading frame 32	1.46786	0.513547	-0.725247	-0.924145	0.278784	0.342653	-1.7791	-1.55198	-1.55586	-1.7248	0.589257	0.136667	1.53116	1.12913	0.547932	-0.0512828	0.713119	0.156868	0	-0.077606	-1.96127	-1.58876	1.11052	0.528262	1.44559	0.16249	1.25217	0.665878	0	-0.17496
728	C5AR1	complement component 5a receptor 1	1.30363	0.395725	0.965288	0.254324	-1.35173	-0.619032	1.09543	0.991151	0.852835	0.120382	1.17354	0.670953	1.20923	0.688158	0.0995357	-0.485095	0.165658	-0.194108	1.06553	0.643588	0.711451	0.0941182	1.04009	0.465029	0.223194	-1.10957	-3.94708	-2.43666	0.539479	0.162179
27202	C5AR2	complement component 5a receptor 2	0.0948133	-0.471507	1.45583	0.596283	1.17187	0.8694	0.648275	0.595547	0.852835	0.120382	1.49546	0.965336	0	-0.968223	0.0995357	-0.485095	0	-0.300311	-0.102761	-0.147159	0.38855	-0.109196	0	-0.468763	0	-1.34184	0.239637	0.0616722	1.0882	0.505097
56951	C5orf15	chromosome 5 open reading frame 15	0	-0.539528	-0.848155	-1.00982	0.471429	0.456276	0.0217282	0.0412337	0.770147	0.0570384	3.12137	2.45212	-2.90014	-4.94078	1.1646	0.545331	-1.57555	-1.31039	-2.71546	-1.91554	-1.78547	-1.47807	0.269111	-0.227156	1.72569	0.45398	0.799203	0.39558	-0.463418	-0.464565
64417	C5orf28	chromosome 5 open reading frame 28	3.48149	1.95817	2.12531	1.06298	1.49952	1.06265	0.953242	0.865354	3.49033	2.14083	1.23287	0.725208	1.20923	0.688158	1.10047	0.483287	3.85761	2.1728	4.10646	2.70181	2.30728	1.09893	1.17607	0.587114	3.19282	1.98072	1.26503	0.673552	2.06171	1.11347
285679	C5orf60	chromosome 5 open reading frame 60	1.24089	0.350717	1.12662	0.366786	0.553638	0.504764	0	0.0220105	0.770147	0.0570384	3.21295	2.53587	0.531156	-0.240654	1.54793	0.916192	1.81623	0.864074	0	-0.077606	0.788365	0.142547	1.41677	0.803214	1.09766	-0.199571	0.197988	0.0368189	0.855283	0.359536
80739	C6orf25	chromosome 6 open reading frame 25	1.63168	0.631079	1.0638	0.323	1.41986	1.01567	0.485427	0.451473	1.37384	0.5195	0.758499	0.291428	1.01658	0.424276	0.641041	0.0387982	1.49045	0.655214	-0.102761	-0.147159	1.78652	0.771032	0.887991	0.328473	0	-1.34184	-0.266056	-0.240088	1.24227	0.601375
221477	C6orf89	chromosome 6 open reading frame 89	0.584963	-0.119862	-1.30063	-1.32524	-1.92135	-0.955001	-1.18771	-1.02877	1.23285	0.411488	-1.7885	-2.03764	0.79419	0.119646	0.777608	0.170923	2.0637	1.02273	-1.24642	-0.921236	1.76561	0.757868	0.0014669	-0.467446	1.63823	0.362963	3.49251	2.00275	2.57365	1.4334
138240	C9orf57	chromosome 9 open reading frame 57	0	-0.539528	0	-0.418577	0.922734	0.722459	0	0.0220105	2.03755	1.02793	0.173536	-0.243483	1.20923	0.688158	1.34148	0.716456	0.0350469	-0.277843	0	-0.077606	0	-0.353846	1.3622	0.754213	1.54512	0.26607	0	-0.0813257	0.23285	-0.0294438
203197	C9orf91	chromosome 9 open reading frame 91	-1.80344	-1.83336	0.116691	-0.337231	0.378319	0.40136	1.05817	0.958186	-0.191532	-0.679654	0.495464	0.0509001	0.531156	-0.240654	1.34148	0.716456	1.2886	0.525806	0.0994465	-0.0102966	-0.52885	-0.686836	1.62182	0.987306	1.44559	0.16249	0.592752	0.272386	0.046729	-0.145757
771	CA12	carbonic anhydrase XII	1.31382	0.40304	-1.87745	-1.72734	-2.57367	-1.33974	-1.2935	-1.12236	1.21032	0.394229	0.758499	0.291428	0	-0.968223	1.1646	0.545331	0.949054	0.308126	-0.698998	-0.550716	1.09164	0.333503	0.966045	0.39855	1.96016	0.697973	0.0904284	-0.0273646	0.754937	0.296826
23632	CA14	carbonic anhydrase XIV	2.81513	1.48011	3.22802	1.83167	-2.15263	-1.09141	0.172238	0.174392	1.03904	0.263022	0	-0.40217	0.209228	-0.681626	0.962969	0.350255	0.732251	0.169134	2.36931	1.52604	3.22709	1.67809	1.57277	0.943268	2.49621	1.25581	2.68928	1.52344	2.96072	1.6753
762	CA4	carbonic anhydrase IV	1.62351	0.625215	2.7193	1.47704	0.611329	0.538791	1.20794	1.09069	0	-0.532931	1.23374	0.726007	0.531156	-0.240654	1.03336	0.418355	-0.899454	-0.87695	0.825728	0.48128	2.00293	0.907297	0.714639	0.172838	1.88616	0.620966	2.21896	1.24279	1.00722	0.454486
768	CA9	carbonic anhydrase IX	1.68764	0.671224	2.09654	1.04292	1.10455	0.829694	-0.399329	-0.33128	2.43379	1.33147	0.495464	0.0509001	0.79419	0.119646	0.226004	-0.36274	-1.23827	-1.09416	2.45723	1.58555	1.09494	0.335583	0.963262	0.396052	2.39312	1.14853	-2.05733	-1.30899	-0.598917	-0.549243
164633	CABP7	calcium binding protein 7	1.55639	0.577066	0.99888	0.277741	0.926803	0.724859	1.30944	1.18049	0.127218	-0.435476	0	-0.40217	0.209228	-0.681626	0.448396	-0.147581	0.870382	0.25769	1.24564	0.765491	1.75251	0.749622	0.176875	-0.309965	0.638232	-0.677672	0.264594	0.076565	0.927425	0.40462
11094	CACFD1	calcium channel flower domain containing 1	0.467857	-0.203877	0.736868	0.0950929	0.0414571	0.202676	0.484311	0.450486	1.46922	0.592561	0	-0.40217	1.20923	0.688158	1.03336	0.418355	0.870382	0.25769	0.348716	0.158419	-0.522416	-0.682785	1.96326	1.29385	1.44559	0.16249	0	-0.0813257	-1.18403	-0.914901
57685	CACHD1	cache domain containing 1	1.77141	0.731321	-0.983101	-1.1039	-3.87498	-2.10727	0.421697	0.395091	1.32507	0.482138	0.980891	0.494792	1.01658	0.424276	-1.2849	-1.8245	1.55273	0.69514	-1.68398	-1.21739	0.861958	0.188885	0.280736	-0.216719	2.33867	1.09187	-1.72918	-1.11317	1.31136	0.644556
773	CACNA1A	calcium channel, voltage-dependent, P/Q type, alpha 1A subunit	-2.32193	-2.20533	-1.18526	-1.24482	-3.4404	-1.85094	1.53943	1.38396	-1.53881	-1.71174	0	-0.40217	1.19213	0.66474	1.96297	1.31773	-3.36335	-2.45655	-1.47364	-1.07503	0.821904	0.163664	0.806507	0.255317	2.28209	1.03298	-3.58612	-2.22126	-0.0300624	-0.193747
774	CACNA1B	calcium channel, voltage-dependent, N type, alpha 1B subunit	0.430862	-0.230417	1.47991	0.613068	-2.08463	-1.0513	-0.839795	-0.720966	1.83346	0.871589	0.589257	0.136667	0	-0.968223	1.64104	1.00627	-2.69293	-2.02674	-0.22444	-0.229516	2.09824	0.967306	0.712431	0.170856	1.54512	0.26607	-2.69029	-1.68669	1.65737	0.860786
775	CACNA1C	calcium channel, voltage-dependent, L type, alpha 1C subunit	-0.706641	-1.04649	1.52629	0.645399	1.56982	1.10411	0.782999	0.714738	-0.202688	-0.6882	-2.32627	-2.5294	1.01658	0.424276	2.1646	1.51281	-2.01209	-1.59026	-0.0425737	-0.106422	3.14948	1.62922	-1.35188	-1.68248	1.88616	0.620966	-3.76168	-2.32602	-1.70256	-1.23895
776	CACNA1D	calcium channel, voltage-dependent, L type, alpha 1D subunit	-2.43682	-2.28776	-2.63386	-2.25464	-4.93935	-2.73503	-1.76611	-1.54049	-2.8089	-2.68468	-3.29692	-3.41699	0	-0.968223	0.810966	0.203196	-1.17315	-1.05242	-1.47079	-1.07309	-1.63314	-1.38215	1.41948	0.805646	0.223194	-1.10957	-3.14539	-1.95826	-3.34316	-2.26421
777	CACNA1E	calcium channel, voltage-dependent, R type, alpha 1E subunit	1.42146	0.480264	0.268749	-0.231232	-3.47399	-1.87075	0.77267	0.7056	-2.66132	-2.57163	-2.37517	-2.57411	0.174831	-0.728742	1.2849	0.661713	-2.81	-2.1018	-1.9222	-1.37863	2.34676	1.12379	1.04009	0.465029	1.96016	0.697973	-3.1988	-1.99014	-1.08443	-0.852658
778	CACNA1F	calcium channel, voltage-dependent, L type, alpha 1F subunit	0.918963	0.119758	-0.920629	-1.06035	-3.41646	-1.83683	-1.21579	-1.05361	0.743106	0.0363241	0.758499	0.291428	1.36397	0.900116	-1.13507	-1.67955	-2.28702	-1.76652	-1.55341	-1.12902	2.84506	1.43754	-1.43785	-1.75967	1.88616	0.620966	-1.82346	-1.16943	-2.43972	-1.69962
8913	CACNA1G	calcium channel, voltage-dependent, T type, alpha 1G subunit	1.23017	0.343022	0.0268973	-0.399827	-3.36543	-1.80673	-1.87787	-1.63936	1.07578	0.291166	0.496921	0.052232	0.531156	-0.240654	0.341481	-0.251019	0.932908	0.297775	-1.91294	-1.37236	1.55707	0.626561	1.76024	1.11157	1.33867	0.0512303	-3.30688	-2.05463	1.18456	0.56531
8912	CACNA1H	calcium channel, voltage-dependent, T type, alpha 1H subunit	0.850576	0.0706958	-0.768623	-0.954382	1.05267	0.799097	-2.91972	-2.56109	1.63425	0.718982	0	-0.40217	0.209228	-0.681626	0	-0.581393	1.40188	0.598429	0.754044	0.432761	0.962496	0.252188	1.17527	0.586394	1.72569	0.45398	-3.01458	-1.88021	1.40702	0.704338
8911	CACNA1I	calcium channel, voltage-dependent, T type, alpha 1I subunit	0.313823	-0.314384	0.713732	0.0789649	-2.33866	-1.20113	-1.88364	-1.64447	1.68243	0.755891	0.0480054	-0.358272	1.66866	1.31748	1.2849	0.661713	-1.17315	-1.05242	1.77445	1.12341	1.21928	0.413869	0	-0.468763	0.96016	-0.342662	-3.2874	-2.04301	0.897776	0.386091
779	CACNA1S	calcium channel, voltage-dependent, L type, alpha 1S subunit	1.05889	0.220148	2.68759	1.45494	0	0.178225	-2.34805	-2.05533	-1.85774	-1.95605	-2.34879	-2.54999	1.65625	1.30048	0	-0.581393	-0.310205	-0.499183	1.67636	1.05702	1.92236	0.856564	0	-0.468763	0.445587	-0.878145	-3.2157	-2.00022	-1.53934	-1.13695
786	CACNG1	calcium channel, voltage-dependent, gamma subunit 1	1.87832	0.808025	2.59235	1.38855	0.898075	0.707915	0.82199	0.749235	0.579759	-0.0888077	0.398269	-0.037979	0.79419	0.119646	1.54793	0.916192	1.76226	0.829471	1.87575	1.19198	1.79716	0.777731	0.295182	-0.203749	1.33867	0.0512303	1.36032	0.730414	1.87669	0.997845
10369	CACNG2	calcium channel, voltage-dependent, gamma subunit 2	0.313823	-0.314384	0	-0.418577	-2.79388	-1.46962	1.38934	1.25118	0	-0.532931	0	-0.40217	0	-0.968223	1.4484	0.819893	0.866137	0.254968	1.04081	0.626857	1.47742	0.576409	0.176875	-0.309965	0	-1.34184	-0.231615	-0.219537	0.444331	0.102718
10368	CACNG3	calcium channel, voltage-dependent, gamma subunit 3	-1.38967	-1.53651	1.54676	0.65967	-2.59196	-1.35053	-0.957376	-0.824991	0.766065	0.0539116	0.496193	0.0515662	0	-0.968223	1.34148	0.716456	-1.99952	-1.5822	0.533816	0.283702	-2.66532	-2.03206	1.10885	0.526756	0.445587	-0.878145	-3.98001	-2.4563	-1.12881	-0.880392
27092	CACNG4	calcium channel, voltage-dependent, gamma subunit 4	2.26211	1.08336	2.96318	1.64705	-1.11715	-0.480678	0.392056	0.368867	1.58672	0.682572	0.291533	-0.135582	1.01658	0.424276	1.85049	1.20891	2.88522	1.5494	1.74212	1.10153	1.46747	0.570143	1.66983	1.03041	2.49621	1.25581	1.22367	0.648871	2.11934	1.14949
27091	CACNG5	calcium channel, voltage-dependent, gamma subunit 5	-1.32496	-1.49009	2.44003	1.28236	0.431892	0.432957	0.977019	0.88639	0	-0.532931	0	-0.40217	1.01658	0.424276	0.888969	0.278662	-1.537	-1.28568	0.375629	0.176635	1.21017	0.408136	1.47002	0.851014	1.96016	0.697973	-1.02832	-0.69495	1.07231	0.495164
59285	CACNG6	calcium channel, voltage-dependent, gamma subunit 6	1.70323	0.682413	2.14224	1.07477	0	0.178225	-0.455941	-0.381366	0.381869	-0.240401	0	-0.40217	0.209228	-0.681626	-0.777608	-1.33371	1.09459	0.401429	1.84615	1.17195	-1.26121	-1.14796	0.299601	-0.199782	0	-1.34184	0.979775	0.503333	2.35999	1.29988
59284	CACNG7	calcium channel, voltage-dependent, gamma subunit 7	1.18644	0.311655	0.569886	-0.0213101	0	0.178225	1.24157	1.12044	-2.32017	-2.31029	0	-0.40217	0.531156	-0.240654	-1.59524	-2.12474	-2.35119	-1.80766	0.434345	0.216376	-0.0308367	-0.373262	1.52451	0.899941	0.638232	-0.677672	0	-0.0813257	0.897776	0.386091
59283	CACNG8	calcium channel, voltage-dependent, gamma subunit 8	1.2726	0.373466	1.4542	0.595144	1.17187	0.8694	1.49577	1.34533	0.489165	-0.158207	1.23243	0.724808	0	-0.968223	0.222392	-0.366234	-2.32193	-1.7889	1.80554	1.14446	1.04073	0.301451	1.71739	1.07311	1.54512	0.26607	0	-0.0813257	1.2887	0.630391
23705	CADM1	cell adhesion molecule 1	2.10659	0.97179	-0.506699	-0.771796	0.0489435	0.207092	0.00480035	0.0262574	0.856679	0.123326	1.49583	0.965669	0.957105	0.342803	1.59524	0.961959	1.74832	0.820532	0.583329	0.317214	-0.621134	-0.744942	0.569443	0.0424814	0.906891	-0.398096	-1.90184	-1.21621	-0.297757	-0.361038
253559	CADM2	cell adhesion molecule 2	1.15276	0.28749	1.21609	0.42916	-2.0508	-1.03135	-0.345847	-0.283965	-1.25692	-1.49579	0.759106	0.291983	0.209228	-0.681626	-1.44095	-1.97548	-2.90837	-2.16486	0.745289	0.426835	1.84046	0.804997	1.5746	0.944906	2.39312	1.14853	1.05323	0.547166	-0.953979	-0.771134
57863	CADM3	cell adhesion molecule 3	0.380861	-0.266289	2.6877	1.45502	-2.11905	-1.0716	-1.20822	-1.04692	-0.701178	-1.07007	1.39671	0.875031	0	-0.968223	1.39593	0.769133	-0.524928	-0.636842	1.45838	0.909487	2.31119	1.10139	0.523883	0.00157769	2.54512	1.30671	-1.67721	-1.08216	-0.268289	-0.342623
199731	CADM4	cell adhesion molecule 4	2.65192	1.36302	1.47938	0.612695	1.51041	1.06907	0.0462871	0.0629612	1.48669	0.605943	1.71817	1.16899	0.209228	-0.681626	-1.12928	-1.67395	2.50417	1.30511	-0.924758	-0.703519	0.538556	-0.014745	0.377392	-0.129942	0.638232	-0.677672	-3.09071	-1.92564	-0.44445	-0.452712
799	CALCR	calcitonin receptor	0.891996	0.100411	0.701795	0.0706436	-2.54996	-1.32576	1.38248	1.2451	-0.432384	-0.864158	1.83736	1.27798	1.37915	0.920918	0.547932	-0.0512828	-2.70684	-2.03567	2.00669	1.2806	-0.534606	-0.69046	1.41474	0.801386	1.22319	-0.0689394	-2.07392	-1.31889	-1.80995	-1.30606
10203	CALCRL	calcitonin receptor-like	1.02206	0.19372	0.857903	0.179466	1.42562	1.01907	0.77267	0.7056	-0.525769	-0.935695	1.17581	0.673034	1.37915	0.920918	0.547932	-0.0512828	1.50144	0.66226	-1.64644	-1.19198	1.79283	0.775007	1.24184	0.646158	1.72569	0.45398	-2.50574	-1.57657	1.77934	0.937012
255022	CALHM1	calcium homeostasis modulator 1	0	-0.539528	1.03292	0.301473	0.471429	0.456276	-1.20955	-1.0481	0.387194	-0.236322	-1.69913	-1.95592	1.66866	1.31748	0.810966	0.203196	0	-0.300311	-0.743394	-0.580765	-0.336531	-0.565743	0.109711	-0.370265	0.96016	-0.342662	-2.36082	-1.49009	0.584963	0.190603
51063	CALHM2	calcium homeostasis modulator 2	0.718665	-0.0239408	-2.52618	-2.17957	0.700594	0.591439	0	0.0220105	-1.57509	-1.73952	1.39593	0.874317	1.01658	0.424276	1.03336	0.418355	0.407729	-0.0389169	-1.77445	-1.27863	-1.86195	-1.52622	0.633608	0.100089	1.33867	0.0512303	0	-0.0813257	1.59596	0.82241
119395	CALHM3	calcium homeostasis modulator 3	0	-0.539528	1.09706	0.346185	0.994991	0.765076	-1.69977	-1.48179	0.00868224	-0.52628	0	-0.40217	0.531156	-0.240654	1.10047	0.483287	0.95706	0.313259	0.483882	0.249905	0	-0.353846	-0.508697	-0.92547	0	-1.34184	0	-0.0813257	1.2564	0.61021
83698	CALN1	calneuron 1	0.793433	0.0296994	-1.93347	-1.76639	0.784415	0.640877	1.34642	1.2132	0.561035	-0.103152	0	-0.40217	1.78282	1.47385	1.2849	0.661713	-3.34967	-2.44778	-1.1761	-0.873637	2.16318	1.00819	0.622411	0.0900361	1.33867	0.0512303	0	-0.0813257	1.47682	0.747956
50632	CALY	calcyon neuron-specific vesicular protein	0.26039	-0.352718	0.894593	0.205043	0.164995	0.27554	0.192717	0.192509	0.589031	-0.081705	0	-0.40217	1.48978	1.07245	0.643856	0.0415216	0.708384	0.153833	0.558785	0.300602	1.7378	0.740355	0.624761	0.0921456	0.445587	-0.878145	0.0622371	-0.0441871	1.06171	0.48854
820	CAMP	cathelicidin antimicrobial peptide	0.718665	-0.0239408	0	-0.418577	0.859495	0.68516	1.11371	1.00732	0	-0.532931	-1.73078	-1.98486	0	-0.968223	0	-0.581393	0.298081	-0.109212	0	-0.077606	1.26597	0.443268	0.966045	0.39855	0.638232	-0.677672	0.239637	0.0616722	1.3729	0.683015
64921	CASD1	CAS1 domain containing 1	-0.713892	-1.05169	0.965161	0.254235	1.31706	0.955036	2.20096	1.96922	2.80899	1.61889	1.7114	1.1628	0	-0.968223	1.88897	1.24614	2.5069	1.30686	1.18108	0.721797	0.610598	0.0306157	1.27023	0.671649	1.63823	0.362963	2.66136	1.50678	0.699183	0.261983
846	CASR	calcium-sensing receptor	0.655929	-0.0689489	0.43024	-0.118657	0.793357	0.646151	0.795073	0.725421	1.67783	0.752368	0.759106	0.291983	1.37915	0.920918	0	-0.581393	-1.87969	-1.50538	3.0465	1.98439	2.46598	1.19886	0.415418	-0.0958024	0.445587	-0.878145	-4.64386	-2.85244	-0.746217	-0.641296
117144	CATSPER1	cation channel, sperm associated 1	2.02826	0.915596	1.18615	0.408287	0.641354	0.556499	1.4217	1.2798	2.29423	1.22456	0.910502	0.430425	0.997028	0.39749	0.448396	-0.147581	1.61243	0.733413	1.63059	1.02605	0.824458	0.165272	1.62065	0.98625	0.445587	-0.878145	-1.38235	-0.906214	-2.26022	-1.58745
117155	CATSPER2	cation channel, sperm associated 2	0	-0.539528	0.387786	-0.148252	0.510466	0.479301	0.421697	0.395091	0.387194	-0.236322	0	-0.40217	1.20923	0.688158	0.728504	0.123416	-2.15081	-1.67919	0.102761	-0.00805337	-3.13476	-2.32764	0.887991	0.328473	1.33867	0.0512303	-1.74174	-1.12067	1.33368	0.658502
347732	CATSPER3	cation channel, sperm associated 3	0.467857	-0.203877	0.434516	-0.115677	0.558892	0.507862	0.882921	0.803141	0.589031	-0.081705	3.68229	2.96505	0.990798	0.388955	-1.59296	-2.12254	-1.71816	-1.40182	0	-0.077606	-1.35485	-1.20693	1.17768	0.588551	1.33867	0.0512303	-1.06404	-0.716266	1.63242	0.845196
378807	CATSPER4	cation channel, sperm associated 4	1.52163	0.552124	0.931026	0.23044	-1.92972	-0.959934	-0.0248591	1.73559e-05	1.32784	0.484261	1.28901	0.77655	1.53116	1.12913	1.39593	0.769133	0	-0.300311	-0.943192	-0.715996	-0.680877	-0.78256	1.17768	0.588551	0.223194	-1.10957	0.923989	0.470044	-1.82126	-1.31312
79820	CATSPERB	catsper channel auxiliary subunit beta	1.00957	0.184759	-2.48226	-2.14895	-2.22024	-1.13129	1.0357	0.93831	-1.32668	-1.54923	0.289013	-0.137886	0.531156	-0.240654	1.39593	0.769133	-0.601357	-0.685841	1.89549	1.20534	-1.1638	-1.08663	-1.22738	-1.5707	0.808157	-0.500842	-5.1405	-3.1488	1.38582	0.691088
257062	CATSPERD	catsper channel auxiliary subunit delta	-2.5285	-2.35353	0.819691	0.152828	-2.26146	-1.1556	1.22485	1.10565	-2.40255	-2.3734	0	-0.40217	1.01658	0.424276	0.728504	0.123416	0.0350469	-0.277843	-0.736079	-0.575814	1.73213	0.736786	0	-0.468763	2.44559	1.20313	-2.32193	-1.46688	0.650311	0.231442
57828	CATSPERG	catsper channel auxiliary subunit gamma	0.15956	-0.425056	1.59355	0.692284	-1.09527	-0.467774	0.0241133	0.0433438	-0.650368	-1.03114	0	-0.40217	1.20923	0.688158	0.341481	-0.251019	2.14303	1.07358	-0.796169	-0.616485	1.82408	0.794685	1.10885	0.526756	2.28209	1.03298	-2.08933	-1.32809	-0.268383	-0.342681
857	CAV1	caveolin 1, caveolae protein, 22kDa	1.34399	0.424679	1.30085	0.488242	0.788893	0.643519	1.49829	1.34756	1.72064	0.785163	1.8751	1.31249	0.997028	0.39749	2.34148	1.68393	1.89158	0.912377	0.533816	0.283702	2.6755	1.33078	1.24031	0.644783	2.09766	0.841064	2.69388	1.52619	1.6143	0.833875
858	CAV2	caveolin 2	1.87144	0.803084	1.35432	0.525515	0.553638	0.504764	1.62298	1.45788	1.53037	0.639405	1.79921	1.24309	0	-0.968223	2.1646	1.51281	2.44684	1.26836	-1.87626	-1.34754	1.93879	0.866913	0.886033	0.326716	2.39312	1.14853	2.13848	1.19476	1.19927	0.574503
859	CAV3	caveolin 3	2.54778	1.28831	0.856255	0.178317	0	0.178225	1.24157	1.12044	0.584403	-0.0852507	-1.18081	-1.48195	1.20923	0.688158	0	-0.581393	0	-0.300311	1.99852	1.27507	1.13275	0.359387	0.0392113	-0.43356	1.33867	0.0512303	0	-0.0813257	0	-0.17496
203260	CCDC107	coiled-coil domain containing 107	1.55639	0.577066	1.76846	0.814214	0.779923	0.638228	-1.70489	-1.48632	1.96127	0.969498	0	-0.40217	1.53116	1.12913	0.810966	0.203196	1.15177	0.438089	2.06795	1.32207	0.40436	-0.0992412	1.03745	0.462656	1.80816	0.539793	1.57659	0.859469	1.26567	0.616
255101	CCDC108	coiled-coil domain containing 108	1.486	0.526567	1.35461	0.525719	0.863746	0.687667	1.32521	1.19444	0	-0.532931	1.1749	0.672202	0	-0.968223	0.547932	-0.0512828	0.509628	0.0264106	-0.180425	-0.199725	1.76708	0.758794	1.11136	0.529014	1.09766	-0.199571	0.717853	0.347037	1.26567	0.616
90693	CCDC126	coiled-coil domain containing 126	1.7415	0.709869	1.70164	0.767635	-0.195616	0.0628488	2.583	2.30722	2.22953	1.175	1.34387	0.826709	1.36397	0.900116	2.1646	1.51281	2.86507	1.53648	2.35586	1.51693	0.686312	0.0782892	1.45516	0.837676	2.68263	1.4498	0.267712	0.0784256	1.32028	0.65013
285025	CCDC141	coiled-coil domain containing 141	-1.66922	-1.73707	0.327235	-0.190461	-4.51571	-2.48517	-0.482059	-0.404473	-0.763251	-1.11762	1.04999	0.557979	1.66866	1.31748	0.728504	0.123416	-2.76145	-2.07068	-1.87812	-1.34879	1.04005	0.301022	0.793109	0.243288	1.22319	-0.0689394	-4.32193	-2.66034	-1.29701	-0.985505
154467	CCDC167	coiled-coil domain containing 167	0.639809	-0.0805136	2.20217	1.11655	0.465847	0.452984	0.570948	0.527135	0.998281	0.2318	1.34346	0.826339	0.79419	0.119646	0.448396	-0.147581	1.53679	0.684922	1.03896	0.625604	1.86785	0.822241	1.30327	0.701312	1.88616	0.620966	2.8193	1.60103	2.0375	1.09835
643677	CCDC168	coiled-coil domain containing 168	2.23554	1.0643	-3.14034	-2.6077	-4.30766	-2.36246	0	0.0220105	0.469219	-0.173487	0.678606	0.218371	1.66866	1.31748	1.59524	0.961959	1.5069	0.665763	0	-0.077606	0.466437	-0.060155	0.879319	0.320687	2.44559	1.20313	1.65666	0.907247	-4.73499	-3.13402
886	CCKAR	cholecystokinin A receptor	1.16408	0.295608	0.573401	-0.0188599	0	0.178225	-0.691268	-0.589562	0.991304	0.226456	0	-0.40217	0	-0.968223	0	-0.581393	-2.03575	-1.60543	0	-0.077606	-0.807355	-0.862196	0.133179	-0.349195	0.638232	-0.677672	0	-0.0813257	0.52412	0.152581
887	CCKBR	cholecystokinin B receptor	0	-0.539528	1.3809	0.544046	-3.75021	-2.03367	0.794069	0.724532	0.387194	-0.236322	0.395929	-0.0401189	0	-0.968223	0.184425	-0.402967	0.291765	-0.113261	-1.02876	-0.773912	0.540988	-0.0132136	0.304006	-0.195827	0	-1.34184	0.979775	0.503333	-1.48868	-1.10529
9236	CCPG1	cell cycle progression 1	0.141356	-0.438116	-0.999904	-1.11561	-0.341963	-0.0234671	-0.929548	-0.800371	0.852835	0.120382	0.676037	0.216022	1.66866	1.31748	0.888969	0.278662	0.515061	0.0298937	-2.27645	-1.6184	-1.70498	-1.42738	0.806507	0.255317	2.09766	0.841064	1.00961	0.521135	0.164884	-0.0719178
1230	CCR1	chemokine (C-C motif) receptor 1	1.76399	0.726	0.859	0.180231	1.11171	0.833921	-0.450742	-0.376766	0.593645	-0.0781707	-1.88536	-2.12621	2.01658	1.79406	0.810966	0.203196	0.298081	-0.109212	-0.0683987	-0.123901	-0.340221	-0.568066	1.41881	0.805038	1.33867	0.0512303	-1.16827	-0.778462	-0.371185	-0.406926
2826	CCR10	chemokine (C-C motif) receptor 10	1.38324	0.452845	1.35383	0.525176	0.714657	0.599734	0.187707	0.188077	0.766065	0.0539116	1.0485	0.556618	0	-0.968223	1.1646	0.545331	1.95706	0.954358	1.43146	0.891266	-0.325325	-0.558687	-0.401781	-0.829482	0.808157	-0.500842	1.22699	0.650855	0.52412	0.152581
729230	CCR2	chemokine (C-C motif) receptor 2	1.18644	0.311655	0.527759	-0.0506768	-2.21334	-1.12722	0.673134	0.61754	0	-0.532931	-0.119823	-0.51174	1.66866	1.31748	1.03336	0.418355	-1.5778	-1.31184	-1.23097	-0.910778	1.3742	0.51142	1.24184	0.646158	0.445587	-0.878145	-1.82346	-1.16943	1.77286	0.932961
1232	CCR3	chemokine (C-C motif) receptor 3	1.09481	0.245917	0.743512	0.099724	0.99111	0.762787	-2.21981	-1.94188	-2.4789	-2.43189	-2.50545	-2.69324	0.209228	-0.681626	1.03336	0.418355	0.298081	-0.109212	-0.763754	-0.594545	1.2907	0.458839	0.887991	0.328473	0.223194	-1.10957	-1.09493	-0.734703	-1.68603	-1.22862
1233	CCR4	chemokine (C-C motif) receptor 4	1.99062	0.888593	0.85804	0.179561	1.16844	0.867375	0.447459	0.417883	0.271717	-0.324783	-2.43216	-2.62623	1.66866	1.31748	0	-0.581393	0.883044	0.265807	-2.57497	-1.82045	0.256349	-0.192436	0.302539	-0.197144	0.445587	-0.878145	-1.72918	-1.11317	0.855283	0.359536
1234	CCR5	chemokine (C-C motif) receptor 5 (gene/pseudogene)	1.43086	0.487007	0.380899	-0.153053	0.636393	0.553573	0	0.0220105	0.146186	-0.420946	-0.885357	-1.21177	1.37915	0.920918	1.10047	0.483287	0.883044	0.265807	-1.41788	-1.03729	0.228222	-0.210146	0.717944	0.175805	1.80816	0.539793	0.717853	0.347037	1.19927	0.574503
1235	CCR6	chemokine (C-C motif) receptor 6	-1.88915	-1.89485	0.449017	-0.105567	0.548366	0.501654	-0.941315	-0.810781	0.766065	0.0539116	1.39593	0.874317	0.79419	0.119646	-2.64779	-3.14306	-2.28116	-1.76276	0.51493	0.270919	-0.986901	-0.975247	0	-0.468763	0.96016	-0.342662	-2.60713	-1.63707	0.8115	0.332174
1236	CCR7	chemokine (C-C motif) receptor 7	2.24622	1.07197	-0.917551	-1.0582	0.889761	0.703011	0.953242	0.865354	1.37652	0.521553	0.759106	0.291983	1.20923	0.688158	0.341481	-0.251019	0.38417	-0.0540201	-0.230974	-0.233938	-0.653095	-0.765066	0.526399	0.00383619	0.445587	-0.878145	0.239637	0.0616722	0.808626	0.330378
1237	CCR8	chemokine (C-C motif) receptor 8	1.486	0.526567	0.858726	0.18004	0.926803	0.724859	0.0670219	0.0813055	0.686754	-0.00684445	0.391404	-0.0442566	1.20923	0.688158	0	-0.581393	1.29808	0.531887	-1.03411	-0.777534	1.51902	0.602605	1.04097	0.465819	0	-1.34184	1.0243	0.529899	-2.26571	-1.59088
10803	CCR9	chemokine (C-C motif) receptor 9	0.984255	0.1666	0	-0.418577	0	0.178225	0	0.0220105	0.774217	0.0601563	-2.40682	-2.60305	0.209228	-0.681626	1.2849	0.661713	0.713119	0.156868	0	-0.077606	0	-0.353846	1.24184	0.646158	0	-1.34184	0.118079	-0.0108646	0.699183	0.261983
9034	CCRL2	chemokine (C-C motif) receptor-like 2	1.98425	0.884024	0	-0.418577	0.553638	0.504764	0	0.0220105	0.271717	-0.324783	-2.40682	-2.60305	0.531156	-0.240654	1.10047	0.483287	0.620009	0.0971761	0	-0.077606	0.0581842	-0.317211	1.30327	0.701312	1.88616	0.620966	1.0764	0.560993	1.19927	0.574503
9398	CD101	CD101 molecule	1.49499	0.533015	1.63887	0.723874	0.793357	0.646151	1.18771	1.07279	0.449675	-0.188458	1.11214	0.614807	1.20923	0.688158	0.226004	-0.36274	0.772518	0.194949	-2.02472	-1.44802	1.68799	0.708994	0.966045	0.39855	0.638232	-0.677672	0.822403	0.409425	1.92157	1.0259
977	CD151	CD151 molecule (Raph blood group)	0.749038	-0.00215004	0.15987	-0.307132	1.51582	1.07227	-0.70515	-0.601843	1.53757	0.644921	1.39593	0.874317	0.79419	0.119646	0	-0.581393	0.791656	0.207218	0.965713	0.576027	-1.12915	-1.06482	1.24261	0.646845	0.96016	-0.342662	1.85475	1.02545	1.17475	0.559184
9332	CD163	CD163 molecule	-1.17042	-1.37921	1.02831	0.298254	-1.14759	-0.49863	-0.238201	-0.188728	1.5751	0.673672	0.676037	0.216022	0.531156	-0.240654	2.03336	1.38583	-4.08185	-2.91718	-3.09462	-2.17217	1.2349	0.423704	1.5264	0.901634	1.80816	0.539793	-3.69029	-2.28342	-0.425653	-0.440964
283316	CD163L1	CD163 molecule-like 1	-2.96597	-2.66739	-0.431046	-0.719058	-2.15804	-1.0946	1.62529	1.45992	1.42102	0.55564	1.23243	0.724808	1.20923	0.688158	1.99859	1.3522	-3.4094	-2.48607	0.478675	0.24638	0.384488	-0.111754	-1.40248	-1.72791	1.72569	0.45398	-4.30194	-2.64841	1.31136	0.644556
8763	CD164	CD164 molecule, sialomucin	0.917538	0.118735	0.214314	-0.269179	0.863746	0.687667	-1.43629	-1.24869	0.00694272	-0.527613	-0.496193	-0.855907	1.01658	0.424276	1.226	0.604734	0.509628	0.0264106	-0.527736	-0.434799	-2.72032	-2.06669	-2.87303	-3.04816	2.16179	0.907801	-3.03344	-1.89146	1.10612	0.516294
388611	CD164L2	CD164 sialomucin-like 2	1.72632	0.698974	0.21695	-0.267342	-2.17333	-1.10362	0	0.0220105	0.931041	0.180291	0	-0.40217	0.531156	-0.240654	0	-0.581393	-1.87272	-1.50091	-2.3784	-1.6874	0.166876	-0.248773	1.11136	0.529014	0.223194	-1.10957	2.52779	1.42707	0.577377	0.185863
4064	CD180	CD180 molecule	0	-0.539528	0.217591	-0.266894	0.863746	0.687667	0.953242	0.865354	0.484204	-0.162007	1.39632	0.874674	1.20923	0.688158	1.49902	0.868873	0.883044	0.265807	0	-0.077606	-0.569735	-0.712579	-1.14119	-1.49332	0.638232	-0.677672	0.0904284	-0.0273646	0	-0.17496
930	CD19	CD19 molecule	1.09481	0.245917	1.77979	0.82211	1.04146	0.792483	-1.09543	-0.94713	0	-0.532931	-2.349	-2.55018	0.209228	-0.681626	0	-0.581393	0.773636	0.195666	0	-0.077606	1.6618	0.692507	0.175273	-0.311404	0	-1.34184	-2.32193	-1.46688	0.35987	0.0499351
909	CD1A	CD1a molecule	2.30363	1.11315	0.906573	0.213393	0.543074	0.498533	-0.187707	-0.144056	-1.20429	-1.45547	0.397489	-0.0386919	0.209228	-0.681626	0	-0.581393	0.157549	-0.199307	2.11036	1.35077	2.2542	1.06551	0.716843	0.174817	2.22319	0.971696	-1.73749	-1.11813	1.83659	0.972785
910	CD1B	CD1b molecule	2.1697	1.01707	2.93584	1.62799	0.850955	0.680123	-0.450742	-0.376766	1.47173	0.594483	0.496921	0.052232	0	-0.968223	0	-0.581393	-0.790391	-0.80703	2.1836	1.40034	2.19639	1.02911	-2.39548	-2.61942	1.96016	0.697973	-2.86272	-1.78959	2.05364	1.10843
911	CD1C	CD1c molecule	1.82941	0.772936	2.81708	1.54521	-1.73661	-0.846039	0.961143	0.872344	1.75581	0.812104	1.049	0.557072	-1.1127	-2.49238	0	-0.581393	2.63034	1.38599	1.87524	1.19163	2.04684	0.934943	1.10968	0.527509	2.16179	0.907801	-3.36129	-2.0871	2.05364	1.10843
912	CD1D	CD1d molecule	2.21936	1.05269	0.493001	-0.0749063	-1.37342	-0.631828	0.75171	0.687057	-0.728555	-1.09104	0.911594	0.431424	2.01658	1.79406	1.226	0.604734	0.327329	-0.0904608	1.45838	0.909487	2.30835	1.0996	1.30254	0.700654	2.09766	0.841064	-2.7089	-1.6978	2.36209	1.30119
913	CD1E	CD1e molecule	-0.134137	-0.635761	-0.382016	-0.68488	0.36038	0.390779	0	0.0220105	1.75581	0.812104	0.677322	0.217197	1.37915	0.920918	0	-0.581393	-0.816186	-0.823567	-0.336071	-0.305072	2.22483	1.04701	-1.73485	-2.02631	1.88616	0.620966	-4.53122	-2.78523	2.05364	1.10843
914	CD2	CD2 molecule	-2.259	-2.16019	-1.59191	-1.52829	0.278784	0.342653	0.0357041	0.0535983	-2.41876	-2.38582	1.54277	1.00859	1.01658	0.424276	0	-0.581393	-1.64815	-1.35694	-2.39727	-1.70017	-0.877281	-0.906225	0.717944	0.175805	1.33867	0.0512303	-1.95433	-1.24753	1.75643	0.922696
4345	CD200	CD200 molecule	1.87144	0.803084	0.998507	0.277481	0.863746	0.687667	-0.573131	-0.485045	2.26577	1.20276	0.676679	0.21661	1.20923	0.688158	1.10047	0.483287	1.34787	0.563807	3.02023	1.96661	1.87422	0.826251	1.47263	0.853358	1.54512	0.26607	1.06224	0.55254	1.50458	0.765305
131450	CD200R1	CD200 receptor 1	0.639809	-0.0805136	1.45511	0.595777	1.11528	0.836027	1.2935	1.16638	1.43106	0.563329	1.17399	0.67137	1.90967	1.64761	0	-0.581393	0.504174	0.0229142	2.54603	1.64565	2.52965	1.23895	0.418129	-0.0933677	2.03055	0.771223	0.0622371	-0.0441871	1.43615	0.722538
344807	CD200R1L	CD200 receptor 1-like	2.02206	0.911144	0.0942711	-0.352861	1.17187	0.8694	0	0.0220105	2.32491	1.24806	0.759106	0.291983	0	-0.968223	1.34148	0.716456	0.604802	0.0874268	1.96059	1.2494	1.46644	0.569494	0	-0.468763	1.96016	0.697973	1.14024	0.599086	0	-0.17496
50489	CD207	CD207 molecule, langerin	1.60702	0.613386	0.894995	0.205323	0.471429	0.456276	0.749481	0.685085	0.998281	0.2318	0	-0.40217	0	-0.968223	0	-0.581393	0.609889	0.090688	1.68714	1.06432	1.33653	0.487699	1.36149	0.753581	0.223194	-1.10957	1.15366	0.607096	1.52412	0.777515
933	CD22	CD22 molecule	0.905543	0.11013	1.06273	0.322253	-3.21652	-1.7189	-1.58775	-1.38269	0.556315	-0.106767	0.496193	0.0515662	1.79419	1.48943	1.64104	1.00627	1.98111	0.969773	2.76856	1.79627	2.90341	1.47428	0.173669	-0.312844	1.96016	0.697973	-3.47794	-2.15671	0.363832	0.0524116
10666	CD226	CD226 molecule	0.0204641	-0.524847	-1.24725	-1.28803	-2.94472	-1.55859	1.18771	1.07279	-0.688188	-1.06012	1.28943	0.776934	1.37915	0.920918	1.10047	0.483287	1.55537	0.696832	-0.960351	-0.72761	0.337777	-0.141165	-0.0647602	-0.526905	1.63823	0.362963	1.06224	0.55254	-1.59158	-1.16959
100133941	CD24	CD24 molecule	NA	NA	NA	NA	NA	NA	NA	NA	NA	NA	NA	NA	NA	NA	NA	NA	NA	NA	NA	NA	NA	NA	NA	NA	NA	NA	NA	NA	NA	NA
51744	CD244	CD244 molecule, natural killer cell receptor 2B4	3.54994	2.00728	3.13181	1.7646	0.537763	0.495401	1.37426	1.23783	1.41582	0.551656	0.981932	0.495743	1.37915	0.920918	-1.28857	-1.82805	-0.576577	-0.669954	2.08016	1.33033	2.201	1.03201	1.24107	0.645471	2.33867	1.09187	1.8055	0.996063	-0.126552	-0.254046
57124	CD248	CD248 molecule, endosialin	1.81513	0.762688	-1.57195	-1.51438	1.11528	0.836027	-0.619886	-0.52641	2.20261	1.15437	0.980891	0.494792	1.19213	0.66474	0	-0.581393	-1.33902	-1.15875	-2.09758	-1.49733	1.74832	0.746984	1.62123	0.986778	2.33867	1.09187	0.688077	0.329269	1.03472	0.471674
939	CD27	CD27 molecule	0.891996	0.100411	1.37784	0.541913	1.20971	0.891721	1.31517	1.18556	1.24264	0.418988	1.17354	0.670953	1.53116	1.12913	2.1646	1.51281	1.4511	0.629987	-0.70188	-0.552667	2.8046	1.41206	0.888969	0.329351	1.63823	0.362963	0.519358	0.228589	1.60329	0.826988
29126	CD274	CD274 molecule	0.351844	-0.287107	1.9118	0.914137	-1.08887	-0.464	1.38676	1.2489	2.79115	1.60522	0.677964	0.217784	0.79419	0.119646	0.547488	-0.0517123	0.451887	-0.0106072	1.27043	0.782273	0.91346	0.221313	0.887991	0.328473	2.66297	1.42934	0.197988	0.0368189	1.81781	0.961053
80381	CD276	CD276 molecule	1.24089	0.350717	1.54983	0.661805	0.440573	0.438077	0.415037	0.389199	1.33061	0.48638	0.758499	0.291428	1.53116	1.12913	1.03336	0.418355	1.51235	0.669253	0.583329	0.317214	0.984299	0.265916	1.24184	0.646158	2.16179	0.907801	-0.616108	-0.448974	1.65737	0.860786
940	CD28	CD28 molecule	0.467857	-0.203877	0.479556	-0.0842792	0.471429	0.456276	0.619886	0.570431	1.25142	0.425718	1.59028	1.05204	1.20923	0.688158	0	-0.581393	1.50417	0.664013	0.333708	0.148261	0.536824	-0.015836	1.04097	0.465819	0.808157	-0.500842	0.351744	0.128569	1.31136	0.644556
11314	CD300A	CD300a molecule	1.65593	0.648475	2.2567	1.15457	1.04894	0.796898	0.941315	0.854802	1.43137	0.563566	1.34468	0.827449	0.79419	0.119646	1.81097	1.17067	2.04085	1.00807	0.591284	0.322599	0.688975	0.0799657	1.62241	0.987834	2.28209	1.03298	1.41296	0.761825	1.27487	0.621753
10871	CD300C	CD300c molecule	1.37353	0.445875	2.09334	1.04069	1.2197	0.89761	1.135	1.02616	1.88872	0.913918	0.590622	0.137915	1.37915	0.920918	1.68544	1.04922	1.84903	0.8851	1.29028	0.795708	1.9059	0.846203	1.71574	1.07163	1.88616	0.620966	1.05851	0.550316	1.13459	0.534085
342510	CD300E	CD300e molecule	1.02206	0.19372	2.20139	1.11601	0.631415	0.550637	0.561529	0.518802	1.06585	0.283561	0.590622	0.137915	1.66866	1.31748	0.547932	-0.0512828	1.04663	0.370679	1.86125	1.18217	1.23064	0.421027	1.03568	0.461072	1.88616	0.620966	0.888118	0.448639	1.13459	0.534085
124599	CD300LB	CD300 molecule-like family member b	1.94544	0.856174	2.16989	1.09405	0.631415	0.550637	1.135	1.02616	1.06585	0.283561	1.23374	0.726007	1.66866	1.31748	1.49902	0.868873	1.36625	0.575587	1.62999	1.02564	1.89521	0.83947	1.57338	0.943814	1.72569	0.45398	1.28144	0.683342	1.40272	0.701647
100131439	CD300LD	CD300 molecule-like family member d	1.37353	0.445875	1.97884	0.96087	0.855231	0.682645	0	0.0220105	1.19825	0.384985	0	-0.40217	1.79419	1.48943	0.448396	-0.147581	1.04663	0.370679	0.845114	0.494401	0.989999	0.269505	1.10633	0.524493	2.54512	1.30671	1.74798	0.961742	1.40272	0.701647
146722	CD300LF	CD300 molecule-like family member f	1.71866	0.693483	2.18473	1.10439	0.709942	0.596953	0.799587	0.729414	1.26015	0.432408	0.982452	0.496219	1.37915	0.920918	1.81097	1.17067	1.8074	0.858413	-0.116918	-0.156741	1.58006	0.641039	1.23801	0.642718	2.03055	0.771223	1.28144	0.683342	1.27487	0.621753
146894	CD300LG	CD300 molecule-like family member g	1.5304	0.558416	0.701795	0.0706436	0.366384	0.39432	0.566219	0.522951	0.678091	-0.0134806	0.676679	0.21661	1.20923	0.688158	1.03336	0.418355	0.594574	0.0808697	-0.415483	-0.358822	0.707141	0.0914041	-0.982298	-1.35067	0.638232	-0.677672	1.09043	0.569363	0.23285	-0.0294438
9936	CD302	CD302 molecule	1.92563	0.841963	-0.0512059	-0.454272	0.994991	0.765076	-0.393426	-0.326058	1.00522	0.237118	0.677322	0.217197	1.01658	0.424276	1.226	0.604734	1.1622	0.444773	-0.526707	-0.434102	0.741891	0.113284	-0.0535155	-0.51681	1.54512	0.26607	0.908237	0.460644	1.41537	0.709556
51293	CD320	CD320 molecule	1.04672	0.211413	1.85831	0.876851	0.93086	0.727252	2.1707	1.94245	1.32507	0.482138	0	-0.40217	1.78282	1.47385	1.68544	1.04922	1.23668	0.492523	-0.179438	-0.199057	0.415552	-0.0921944	1.30401	0.701971	2.96016	1.73861	0.892312	0.451141	1.24234	0.601419
945	CD33	CD33 molecule	0.850576	0.0706958	1.09474	0.344563	0.863746	0.687667	-0.776831	-0.665261	1.00176	0.234462	0.0480054	-0.358272	0	-0.968223	-0.321928	-0.89285	-1.67475	-1.37399	-0.140213	-0.172508	0.325779	-0.14872	0.887991	0.328473	0.96016	-0.342662	0.892312	0.451141	1.50458	0.765305
947	CD34	CD34 molecule	-1.42242	-1.56	0.419062	-0.12645	-2.67707	-1.40073	0.891029	0.810314	1.19522	0.382662	1.0485	0.556618	1.36397	0.900116	0.547932	-0.0512828	-1.03517	-0.963959	-0.676016	-0.535161	1.41855	0.539339	1.52577	0.90107	1.22319	-0.0689394	1.96544	1.09151	1.56607	0.803732
948	CD36	CD36 molecule (thrombospondin receptor)	1.93886	0.851459	0.85804	0.179561	0.784415	0.640877	1.06499	0.964221	1.61622	0.705173	0.497649	0.0528974	1.20923	0.688158	1.226	0.604734	1.15177	0.438089	-1.16518	-0.866247	-0.611959	-0.739165	1.88701	1.22539	0.638232	-0.677672	0.442028	0.182445	-0.164884	-0.278002
951	CD37	CD37 molecule	0.503926	-0.178	0.81955	0.15273	-1.70536	-0.82761	-0.387688	-0.320981	0.678091	-0.0134806	0.758499	0.291428	0.79419	0.119646	0.341037	-0.251448	0	-0.300311	-0.962032	-0.728748	-0.392085	-0.600722	1.24107	0.645471	0	-1.34184	-2.32193	-1.46688	1.4647	0.740379
952	CD38	CD38 molecule	0.958492	0.148117	1.30135	0.488594	-2.39146	-1.23227	0.749481	0.685085	0.856679	0.123326	0.980891	0.494792	1.37915	0.920918	1.1646	0.545331	1.74601	0.819052	-1.34872	-0.990471	1.54505	0.618989	-1.33616	-1.66837	1.88616	0.620966	-3.15497	-1.96398	1.34246	0.663991
916	CD3E	CD3e molecule, epsilon (CD3-TCR complex)	0.958492	0.148117	0.480448	-0.0836576	0.784415	0.640877	-2.1602	-1.88914	1.43651	0.567508	1.58926	1.0511	2.08867	1.8928	1.4484	0.819893	0.778162	0.198568	1.03411	0.622322	0.505577	-0.03551	0.887012	0.327595	0.584963	-0.733106	-0.298081	-0.259199	1.55099	0.794309
917	CD3G	CD3g molecule, gamma (CD3-TCR complex)	-1.2041	-1.40338	0.274175	-0.22745	-1.68024	-0.812789	0.361793	0.342093	1.38187	0.525647	1.17445	0.671786	1.98715	1.75374	1.1646	0.545331	1.22014	0.481921	-0.0683987	-0.123901	-1.14925	-1.07747	0.965118	0.397718	0.70044	-0.612936	-0.0838411	-0.131356	1.6143	0.833875
920	CD4	CD4 molecule	1.43086	0.487007	1.80013	0.836289	1.21305	0.893689	1.57102	1.41191	1.75375	0.810526	1.04801	0.556163	1.53116	1.12913	2.31347	1.65683	1.33564	0.555966	-1.03341	-0.777056	3.01375	1.54376	0.719044	0.176793	1.88616	0.620966	-1.92434	-1.22963	-0.536131	-0.510006
958	CD40	CD40 molecule, TNF receptor superfamily member 5	0.971431	0.1574	1.63703	0.722593	2.63708	1.73359	0.183262	0.184145	1.38453	0.527688	0.459432	0.0179504	1.53116	1.12913	0.547932	-0.0512828	1.27905	0.519684	-0.0572748	-0.116372	0.881979	0.201491	1.41745	0.803822	2.39312	1.14853	0.539947	0.240876	2.65203	1.48238
959	CD40LG	CD40 ligand	1.00957	0.184759	0.964906	0.254058	1.32016	0.956862	0.977019	0.88639	1.11764	0.323234	1.05049	0.558433	1.20923	0.688158	1.03336	0.418355	1.59457	0.721968	0.457571	0.232096	1.38769	0.519911	1.17607	0.587114	-0.445587	-1.80553	0.14521	0.00532516	0.915702	0.397294
960	CD44	CD44 molecule (Indian blood group)	1.78613	0.741883	-0.827507	-0.995431	0.272402	0.338889	-3.69614	-3.248	2.39102	1.2987	1.11261	0.615241	1.20923	0.688158	1.1646	0.545331	1.32949	0.55202	-2.7372	-1.93025	1.04378	0.30337	0.806507	0.255317	1.54512	0.26607	0.849557	0.425628	0.577377	0.185863
4179	CD46	CD46 molecule, complement regulatory protein	1.95198	0.860868	1.35938	0.529045	1.81807	1.25053	1.20794	1.09069	2.03586	1.02663	0	-0.40217	1.19213	0.66474	0.448396	-0.147581	3.66802	2.05125	1.87823	1.19366	1.40858	0.533067	0.887991	0.328473	1.63823	0.362963	1.25931	0.67014	0.0454596	-0.14655
961	CD47	CD47 molecule	2.3784	1.16679	1.21631	0.429309	1.42562	1.01907	0.447156	0.417615	2.41321	1.31571	0.932413	0.450462	0.79419	0.119646	1.226	0.604734	1.56063	0.700206	2.30474	1.48233	2.32116	1.10767	0.0800115	-0.396929	1.80816	0.539793	0.37485	0.142358	2.35999	1.29988
962	CD48	CD48 molecule	3.10659	1.68921	2.9177	1.61535	0.151149	0.267373	-0.572282	-0.484294	1.3027	0.465003	1.34427	0.827079	1.20923	0.688158	1.226	0.604734	-0.69912	-0.748516	0.139567	0.0168587	0.635627	0.0463753	1.17687	0.587833	2.28209	1.03298	-1.24922	-0.826768	2.38789	1.31731
921	CD5	CD5 molecule	0.807932	0.0401017	0.893924	0.204576	1.22301	0.899564	0	0.0220105	1.52555	0.635712	1.39593	0.874317	2.00684	1.78071	0.100473	-0.484188	0.945034	0.305549	0.698998	0.395504	0.595104	0.0208604	0.302539	-0.197144	0.808157	-0.500842	-2.25969	-1.42975	1.6143	0.833875
1043	CD52	CD52 molecule	0	-0.539528	0.273763	-0.227737	0	0.178225	0	0.0220105	0.770147	0.0570384	1.11214	0.614807	0	-0.968223	0	-0.581393	0.604802	0.0874268	-2.37003	-1.68174	-0.1005	-0.417126	1.04009	0.465029	0.808157	-0.500842	0	-0.0813257	0.8115	0.332174
963	CD53	CD53 molecule	0.918963	0.119758	-1.79605	-1.6706	-2.80187	-1.47434	-1.30944	-1.13647	1.14619	0.345102	0.676037	0.216022	1.37915	0.920918	0.641041	0.0387982	0.713119	0.156868	-2.26132	-1.60816	-0.609735	-0.737765	0.887991	0.328473	0.808157	-0.500842	0.706409	0.340208	1.86454	0.990256
965	CD58	CD58 molecule	1.11827	0.262747	1.70225	0.768062	-3.7384	-2.02671	-0.897097	-0.771661	-0.423305	-0.857203	0.0480054	-0.358272	0.531156	-0.240654	1.2849	0.661713	0.858203	0.249882	-3.18096	-2.23061	0.533796	-0.0177421	0.805471	0.254387	0.808157	-0.500842	1.23168	0.653649	-2.73358	-1.88326
923	CD6	CD6 molecule	1.52163	0.552124	1.09613	0.345537	-1.77934	-0.871243	0.566219	0.522951	1.42362	0.557627	1.49546	0.965336	1.89917	1.63323	0.448396	-0.147581	-1.03356	-0.962928	0.962032	0.573536	0.935539	0.235215	0.887991	0.328473	1.22319	-0.0689394	0.0622371	-0.0441871	-1.52993	-1.13107
967	CD63	CD63 molecule	1.94544	0.856174	1.05425	0.316339	1.51041	1.06907	-0.492759	-0.413939	1.26305	0.434629	0.676037	0.216022	0.79419	0.119646	1.10047	0.483287	1.32949	0.55202	-0.115669	-0.155896	1.11976	0.35121	1.47132	0.852187	2.49621	1.25581	1.26459	0.673292	1.72301	0.901809
968	CD68	CD68 molecule	-3.20343e-16	-0.539528	0.273969	-0.227593	-0.431892	-0.0765081	-0.725914	-0.620214	1.43908	0.569474	1.17354	0.670953	1.78282	1.47385	0.888969	0.278662	0.17255	-0.189689	-0.457571	-0.387308	0.215655	-0.218059	-0.491312	-0.909862	1.44559	0.16249	0	-0.0813257	-2.99279	-2.04525
969	CD69	CD69 molecule	1.2726	0.373466	-1.3306	-1.34614	-1.23006	-0.547272	0.62955	0.578981	1.12084	0.325685	1.23243	0.724808	0.531156	-0.240654	2.03336	1.38583	1.04596	0.370251	0.19341	0.0533015	1.2912	0.459156	0.017702	-0.452871	1.22319	-0.0689394	0.118079	-0.0108646	-2.41061	-1.68143
924	CD7	CD7 molecule	1.31382	0.40304	2.37813	1.23921	-1.68364	-0.814798	0.745094	0.681203	0.589031	-0.081705	0	-0.40217	1.90967	1.64761	-0.801848	-1.35716	2.01025	0.98846	0.961072	0.572886	1.66876	0.696886	1.35867	0.751049	2.03055	0.771223	1.77429	0.97744	1.45247	0.732737
970	CD70	CD70 molecule	0.590341	-0.116004	1.12741	0.367341	0.372364	0.397847	1.09543	0.991151	1.00868	0.239768	1.58857	1.05048	0.503704	-0.278257	0.888969	0.278662	0.961046	0.315814	1.87626	1.19232	0.904652	0.215767	0	-0.468763	2.84769	1.62156	0.351744	0.128569	1.07772	0.498546
971	CD72	CD72 molecule	0.623508	-0.0922089	-1.19127	-1.24901	-2.12702	-1.0763	1.03917	0.941378	1.8039	0.848947	0.676037	0.216022	0.209228	-0.681626	0.962969	0.350255	1.33564	0.555966	1.48254	0.925839	1.3441	0.492464	1.03745	0.462656	2.33867	1.09187	-3.59364	-2.22575	0.712795	0.27049
972	CD74	CD74 molecule, major histocompatibility complex, class II invariant chain	1.40248	0.466645	0.69178	0.0636617	0.471429	0.456276	-0.844051	-0.724731	0.387194	-0.236322	3.50264	2.80077	0.142801	-0.772617	1.03336	0.418355	1.45676	0.633614	-1.16829	-0.868352	-1.01587	-0.993486	1.24107	0.645471	2.09766	0.841064	-1.69029	-1.08997	0.52412	0.152581
973	CD79A	CD79a molecule, immunoglobulin-associated alpha	0.733932	-0.0129881	1.50316	0.629271	-1.49149	-0.701463	0.673134	0.61754	1.2043	0.389617	0.396709	-0.0394052	1.20923	0.688158	-0.100473	-0.678598	1.27265	0.515581	1.73118	1.09412	1.98047	0.893152	0.0409718	-0.431979	1.44559	0.16249	0.0904284	-0.0273646	1.48478	0.752928
974	CD79B	CD79b molecule, immunoglobulin-associated beta	0.996966	0.175719	2.47639	1.30771	0.700466	0.591364	0.725914	0.664235	0	-0.532931	0.982452	0.496219	1.01658	0.424276	1.4484	0.819893	1.18308	0.45816	0.606234	0.332717	2.06884	0.948799	1.03657	0.461864	0.638232	-0.677672	1.07271	0.55879	1.24227	0.601375
941	CD80	CD80 molecule	1.26211	0.365938	1.87697	0.889859	1.37832	0.991166	1.53943	1.38396	2.20261	1.15437	1.49583	0.965669	0.79419	0.119646	0	-0.581393	0.604802	0.0874268	2.30474	1.48233	2.34165	1.12057	1.03921	0.464238	1.33867	0.0512303	1.06224	0.55254	1.92157	1.0259
975	CD81	CD81 molecule	0.623508	-0.0922089	0.00149344	-0.417536	0.950609	0.7389	-1.98697	-1.73588	1.32784	0.484261	0.874469	0.397476	1.37915	0.920918	-0.106915	-0.68483	0.193757	-0.176094	-2.30587	-1.63831	-2.07369	-1.65954	0.888969	0.329351	0.223194	-1.10957	1.59275	0.869113	1.65737	0.860786
3732	CD82	CD82 molecule	1.02206	0.19372	1.18724	0.409049	0.465847	0.452984	-0.376745	-0.3113	2.02565	1.01881	0.911048	0.430925	1.53116	1.12913	1.64104	1.00627	-1.76434	-1.43143	-1.52259	-1.10816	-0.111061	-0.423776	0.943701	0.37849	1.33867	0.0512303	0.49847	0.216125	0.956476	0.422775
9308	CD83	CD83 molecule	1.52163	0.552124	1.87562	0.888914	1.11528	0.836027	0.673134	0.61754	1.38187	0.525647	-1.00514	-1.32131	0.531156	-0.240654	-1.78187	-2.3053	1.21681	0.479786	0.558785	0.300602	2.46199	1.19634	1.24261	0.646845	1.63823	0.362963	1.85563	1.02598	-0.415162	-0.434408
8832	CD84	CD84 molecule	0.749038	-0.00215004	0.39766	-0.141368	-1.90496	-0.94533	1.07692	0.974775	1.71006	0.777055	1.28985	0.777318	1.01658	0.424276	1.10047	0.483287	0.451859	-0.0106252	1.8252	1.15776	2.16738	1.01084	0.887012	0.327595	2.76751	1.53814	-1.97323	-1.25881	2.66789	1.49229
942	CD86	CD86 molecule	1.70323	0.682413	0.742471	0.0989987	-1.51096	-0.71295	0.725914	0.664235	2.00155	1.00035	0.981412	0.495268	1.53116	1.12913	1.10047	0.483287	-2.97116	-2.20512	2.26774	1.45729	1.25989	0.439445	1.24031	0.644783	2.03055	0.771223	-3.75154	-2.31997	2.1448	1.1654
925	CD8A	CD8a molecule	1.28302	0.380939	0.21695	-0.267342	0	0.178225	0	0.0220105	-1.05309	-1.33965	1.28901	0.77655	-0.942775	-2.25962	0.810966	0.203196	-1.29067	-1.12776	0	-0.077606	0	-0.353846	0.965118	0.397718	2.16179	0.907801	0.908237	0.460644	0	-0.17496
926	CD8B	CD8b molecule	1.58193	0.595385	1.40634	0.561783	0.278784	0.342653	0	0.0220105	1.07578	0.291166	1.17354	0.670953	1.66866	1.31748	0.810966	0.203196	1.23339	0.490413	1.08568	0.657227	0.848311	0.180292	0.887012	0.327595	2.28209	1.03298	-1.45258	-0.94812	0.733156	0.283214
928	CD9	CD9 molecule	-0.267973	-0.731779	1.44141	0.586231	1.88729	1.29136	-0.162133	-0.12143	2.48047	1.36723	0	-0.40217	1.37915	0.920918	2.4484	1.78737	2.02175	0.99583	0.629618	0.348545	2.02199	0.919294	-0.388122	-0.817219	0.96016	-0.342662	1.16696	0.615032	1.96219	1.05128
22918	CD93	CD93 molecule	0.958492	0.148117	-2.07561	-1.86548	-1.43454	-0.667878	0	0.0220105	1.06917	0.286102	0.980891	0.494792	1.79419	1.48943	1.49902	0.868873	-0.654555	-0.719945	-1.10276	-0.823999	-0.249227	-0.510771	1.24107	0.645471	2.03055	0.771223	-2.84303	-1.77784	0.484777	0.127994
10225	CD96	CD96 molecule	1.18644	0.311655	1.30044	0.487961	-1.52984	-0.724083	-0.392056	-0.324846	2.03735	1.02777	1.58892	1.05079	1.01658	0.424276	0.226004	-0.36274	-3.9162	-2.81098	-0.576801	-0.468008	1.98702	0.897278	0.804435	0.253457	1.63823	0.362963	-2.32193	-1.46688	2.03208	1.09496
976	CD97	CD97 molecule	1.4587	0.506976	-0.61119	-0.844636	0.564476	0.511156	1.46762	1.32043	1.20128	0.387304	-1.87883	-2.12024	1.78282	1.47385	2.226	1.57221	0.407729	-0.0389169	-0.0867881	-0.136348	0.538523	-0.0147657	0.624761	0.0921456	1.88616	0.620966	-2.53884	-1.59632	2.38145	1.31329
4267	CD99	CD99 molecule	NA	NA	0.525687	-0.0521212	0.616377	0.541768	0	0.0220105	NA	NA	NA	NA	NA	NA	1.39593	0.769133	NA	NA	NA	NA	NA	NA	NA	NA	NA	NA	1.43798	0.776758	NA	NA
83692	CD99L2	CD99 molecule-like 2	1.42146	0.480264	0.7989	0.138335	0.62642	0.547691	-0.175436	-0.1332	-0.714804	-1.08051	1.87566	1.313	0.79419	0.119646	1.59524	0.961959	-0.21816	-0.440174	-0.696833	-0.549251	2.13594	0.991047	1.17447	0.585674	0.906891	-0.398096	2.01697	1.12226	1.90083	1.01294
64866	CDCP1	CUB domain containing protein 1	1.03444	0.202604	-0.8211	-0.990964	0.164995	0.27554	0.749481	0.685085	0.271717	-0.324783	-2.38082	-2.57928	1.90967	1.64761	-1.19661	-1.73908	1.16911	0.449203	-2.20789	-1.57199	-1.42389	-1.2504	1.04009	0.465029	1.22319	-0.0689394	-3.38753	-2.10276	-1.39481	-1.04662
999	CDH1	cadherin 1, type 1, E-cadherin (epithelial)	-2.75265	-2.51434	-7.83684	-5.88162	-4.48329	-2.46605	-0.0357041	-0.00957727	1.48669	0.605943	0.676037	0.216022	1.1257	0.573749	1.34148	0.716456	1.87673	0.902856	-1.11567	-0.832736	-2.23834	-1.76321	-1.6433	-1.94412	2.28209	1.03298	1.37485	0.739085	-1.12213	-0.876215
1008	CDH10	cadherin 10, type 2 (T2-cadherin)	2.23017	1.06045	1.29933	0.487186	0	0.178225	-1.4217	-1.23578	1.63845	0.722202	0.174447	-0.24265	0	-0.968223	0.106915	-0.477955	2.73458	1.45283	2.91193	1.8933	2.83225	1.42947	1.03833	0.463447	2.39312	1.14853	0.882176	0.445093	1.86141	0.988297
1009	CDH11	cadherin 11, type 2, OB-cadherin (osteoblast)	-1.17042	-1.37921	-0.399071	-0.696769	-2.46419	-1.27517	-0.088688	-0.0564527	-1.67121	-1.81316	1.04801	0.556163	0.79419	0.119646	1.03336	0.418355	-0.628579	-0.703292	-2.65505	-1.87465	-1.46726	-1.2777	-0.0697608	-0.531395	1.33867	0.0512303	-1.68083	-1.08432	-0.79188	-0.669833
1010	CDH12	cadherin 12, type 2 (N-cadherin 2)	2.23017	1.06045	-1.724	-1.62038	-4.38164	-2.40609	-2.24326	-1.96263	2.03226	1.02388	0	-0.40217	1.20923	0.688158	-0.718486	-1.27651	-1.73939	-1.41543	0.180386	0.0444867	3.19946	1.66069	-2.10114	-2.35516	2.59243	1.35593	-2.36586	-1.4931	-1.49714	-1.11058
1013	CDH15	cadherin 15, type 1, M-cadherin (myotubule)	1.08294	0.237398	-0.323662	-0.644201	-2.72749	-1.43047	1.18771	1.07279	0.994797	0.229131	0.589257	0.136667	0.79419	0.119646	1.34148	0.716456	-0.238533	-0.453234	0.962032	0.573536	0.318101	-0.153554	-2.09366	-2.34845	1.09766	-0.199571	-3.3415	-2.07529	-1.35831	-1.02381
1014	CDH16	cadherin 16, KSP-cadherin	0.878321	0.0906007	-2.0514	-1.84861	-1.45818	-0.68182	-0.0357041	-0.00957727	0.920062	0.17188	0.397489	-0.0386919	0.79419	0.119646	0.100473	-0.484188	0.694085	0.144666	1.59545	1.00226	0.235781	-0.205387	-0.788805	-1.17695	0.223194	-1.10957	-1.94708	-1.2432	-1.64586	-1.20352
1015	CDH17	cadherin 17, LI cadherin (liver-intestine)	-1.19785	-1.39889	0.480448	-0.0836576	-1.26195	-0.566082	0.566219	0.522951	-0.433435	-0.864963	0.289013	-0.137886	1.20923	0.688158	-2.05102	-2.56571	-0.853922	-0.847759	2.13547	1.36777	-2.06178	-1.65204	0.0572229	-0.417389	1.33867	0.0512303	-0.847448	-0.587021	-1.06439	-0.840132
1016	CDH18	cadherin 18, type 2	0.243027	-0.365175	1.52603	0.645218	-3.99133	-2.17589	0.749481	0.685085	-1.98338	-2.0523	-3.32193	-3.43986	0	-0.968223	1.226	0.604734	-0.279384	-0.479424	0.867173	0.509331	3.00001	1.5351	0.0356839	-0.436726	3.0645	1.84719	-2.14993	-1.36425	0.315941	0.0224827
28513	CDH19	cadherin 19, type 2	0	-0.539528	1.50351	0.629516	-2.48022	-1.28462	1.0357	0.93831	-2.54798	-2.4848	-1.56458	-1.83288	0	-0.968223	0.341481	-0.251019	-2.20426	-1.71346	1.10276	0.668787	0.900938	0.213428	0.017702	-0.452871	0.445587	-0.878145	0.908237	0.460644	-3.17035	-2.15622
1000	CDH2	cadherin 2, type 1, N-cadherin (neuronal)	1.54778	0.570886	0.893522	0.204296	-3.39823	-1.82607	-1.0357	-0.894289	0.745482	0.0381439	-3.17371	-3.30432	1.37915	0.920918	1.4484	0.819893	-2.22211	-1.72491	2.08568	1.33407	0.13975	-0.265852	0.415418	-0.0958024	2.16179	0.907801	-2.41369	-1.52164	-2.47074	-1.71901
28316	CDH20	cadherin 20, type 2	1.412	0.473477	0.899474	0.208445	-0.794178	-0.290186	0.187707	0.188077	-0.791693	-1.13941	0	-0.40217	1.20923	0.688158	0.810966	0.203196	0.732673	0.169404	0.585719	0.318832	1.05841	0.312582	-0.949269	-1.32102	1.63823	0.362963	0	-0.0813257	1.32419	0.652574
64405	CDH22	cadherin 22, type 2	0.749038	-0.00215004	1.40334	0.559688	2.51116	1.65932	-0.450742	-0.376766	1.20731	0.391925	0.910502	0.430425	0	-0.968223	-1.06488	-1.61164	-1.61692	-1.33692	2.29105	1.47307	2.18868	1.02426	1.03833	0.463447	1.09766	-0.199571	-1.21761	-0.807906	2.19678	1.19788
64072	CDH23	cadherin-related 23	1.58193	0.595385	1.35354	0.524973	-1.60972	-0.771196	0.293497	0.28167	-1.32365	-1.54691	-1.0895	-1.39845	1.66866	1.31748	0.641041	0.0387982	-2.24128	-1.73719	-1.66899	-1.20725	-0.696988	-0.792703	1.03921	0.464238	0	-1.34184	-3.39869	-2.10941	-1.91824	-1.37374
64403	CDH24	cadherin 24, type 2	-0.237168	-0.709678	-1.27942	-1.31046	-2.61502	-1.36413	0.116993	0.125515	1.37384	0.5195	0	-0.40217	-2.52774	-4.43068	1.68544	1.04922	2.5764	1.35142	-0.43886	-0.374644	1.6788	0.703211	1.04097	0.465819	1.22319	-0.0689394	-1.2315	-0.816195	1.43615	0.722538
60437	CDH26	cadherin 26	-0.478372	-0.882724	-0.777206	-0.960366	0.839426	0.673323	1.01641	0.921237	1.00522	0.237118	0.759106	0.291983	1.78282	1.47385	1.54793	0.916192	0.53675	0.0437982	0.457571	0.232096	2.97721	1.52075	1.5746	0.944906	1.44559	0.16249	-2.10297	-1.33622	1.19429	0.571395
1001	CDH3	cadherin 3, type 1, P-cadherin (placental)	1.95849	0.865541	-0.571393	-0.816894	0.465847	0.452984	0.673134	0.61754	-2.13441	-2.16799	0.395929	-0.0401189	1.36397	0.900116	0	-0.581393	-1.24288	-1.09712	-1.37707	-1.00966	-2.49212	-1.92301	-0.627254	-1.03191	1.09766	-0.199571	1.22699	0.650855	0.42698	0.0918746
1002	CDH4	cadherin 4, type 1, R-cadherin (retinal)	0.93226	0.129298	2.44085	1.28294	2.45232	1.62462	0.729438	0.667353	2.1098	1.08328	1.0485	0.556618	2.10703	1.91795	1.68544	1.04922	1.98698	0.973541	1.98016	1.26264	3.34676	1.75343	1.62359	0.988889	2.03055	0.771223	1.43105	0.772619	1.25162	0.607222
1003	CDH5	cadherin 5, type 2 (vascular endothelium)	-1.10532	-1.33251	0.104919	-0.345438	0.171868	0.279594	0.325211	0.309728	0.757867	0.0476315	-1.61606	-1.87996	0.79419	0.119646	1.226	0.604734	-1.31412	-1.14279	0	-0.077606	-0.878056	-0.906713	-2.09036	-2.34548	0.808157	-0.500842	1.0764	0.560993	-2.62017	-1.81239
1004	CDH6	cadherin 6, type 2, K-cadherin (fetal kidney)	2.11827	0.980171	-1.32996	-1.34569	-3.58278	-1.93492	-0.415037	-0.345178	-0.18065	-0.671318	1.28943	0.776934	0	-0.968223	-0.955525	-1.50584	-1.5827	-1.31498	3.481	2.27847	0.748832	0.117655	1.47132	0.852187	2.33867	1.09187	-2.11104	-1.34104	2.45049	1.35644
1005	CDH7	cadherin 7, type 2	0.467857	-0.203877	-1.40191	-1.39585	-2.64455	-1.38155	1.0357	0.93831	-1.00827	-1.30531	-2.42709	-2.62159	0	-0.968223	1.03336	0.418355	-2.97039	-2.20463	-2.20491	-1.56998	0.0285105	-0.335895	0.307209	-0.192952	0.96016	-0.342662	-2.62226	-1.6461	-3.46934	-2.34307
1006	CDH8	cadherin 8, type 2	-1.12066	-1.34352	-1.94614	-1.77523	-3.45055	-1.85693	1.71181	1.53647	-1.45979	-1.6512	1.17354	0.670953	0	-0.968223	-1.93999	-2.45829	-3.59009	-2.60191	0.698998	0.395504	0.167066	-0.248653	-2.33062	-2.56119	0.445587	-0.878145	-4.02008	-2.48022	0.254435	-0.0159544
1007	CDH9	cadherin 9, type 2 (T1-cadherin)	2.11827	0.980171	0.427838	-0.120332	-3.96252	-2.1589	-1.77244	-1.54608	-1.48693	-1.67199	1.71848	1.16927	0	-0.968223	1.64104	1.00627	-0.718699	-0.761069	0.169894	0.0373854	2.49729	1.21857	-2.15389	-2.40252	2.44559	1.20313	-2.43459	-1.53411	-1.81444	-1.30886
92211	CDHR1	cadherin-related family member 1	0.687638	-0.0462003	0.701336	0.0703237	0.383371	0.404339	0	0.0220105	-1.04833	-1.336	1.11214	0.614807	1.37915	0.920918	1.03336	0.418355	0	-0.300311	-2.24313	-1.59585	0.871036	0.1946	-0.374615	-0.805092	0	-1.34184	0	-0.0813257	0.927425	0.40462
54825	CDHR2	cadherin-related family member 2	0.945436	0.13875	1.2162	0.429234	-2.44182	-1.26198	-0.227898	-0.179613	0	-0.532931	3.71434	2.99436	0	-0.968223	0.962969	0.350255	1.19328	0.464701	-2.51061	-1.77689	0.612995	0.0321253	-2.32193	-2.55339	1.09766	-0.199571	1.79381	0.989087	0.402718	0.0767127
222256	CDHR3	cadherin-related family member 3	-2.12014	-2.06057	0.47902	-0.0846524	1.59561	1.11932	0.75371	0.688826	-1.54341	-1.71526	1.67732	1.13163	0.531156	-0.240654	1.85049	1.20891	1.43686	0.620856	0.923117	0.547197	-0.768029	-0.837434	0.714639	0.172838	2.09766	0.841064	-0.901947	-0.619542	-2.03203	-1.44484
389118	CDHR4	cadherin-related family member 4	1.95849	0.865541	0	-0.418577	0	0.178225	0	0.0220105	0.271717	-0.324783	-0.408224	-0.775465	0	-0.968223	0	-0.581393	0.0350469	-0.277843	0	-0.077606	0	-0.353846	0.804435	0.253457	0	-1.34184	0.994768	0.51228	1.12444	0.527742
53841	CDHR5	cadherin-related family member 5	-0.141356	-0.64094	0	-0.418577	-0.151149	0.0890759	0.145074	0.150359	0.484204	-0.162007	1.17399	0.67137	1.53116	1.12913	-2.95029	-3.43572	0.703633	0.150787	-2.32999	-1.65463	0.410454	-0.0954043	0.526399	0.00383619	0	-1.34184	-1.41369	-0.924914	0.956476	0.422775
10423	CDIPT	CDP-diacylglycerol--inositol 3-phosphatidyltransferase	2.69935	1.39705	2.85732	1.57326	1.95534	1.33149	-0.351722	-0.289162	1.72695	0.789999	1.6333	1.09138	0.531156	-0.240654	1.34148	0.716456	2.3433	1.20197	0.253524	0.0939895	-0.157718	-0.453153	1.71794	1.0736	1.09954	-0.197623	1.29678	0.692498	1.90677	1.01664
50937	CDON	cell adhesion associated, oncogene regulated	1.05889	0.220148	-2.53925	-2.18869	-2.60616	-1.35891	0.799587	0.729414	-1.40642	-1.61032	0.759106	0.291983	1.87795	1.60416	1.88897	1.24614	-1.49336	-1.2577	-1.42506	-1.04214	0.855972	0.185116	1.92802	1.26221	0.263034	-1.06812	-2.00138	-1.2756	-0.464956	-0.465527
256223	CDRT15L2	CMT1A duplicated region transcript 15-like 2	0	-0.539528	0	-0.418577	0	0.178225	0	0.0220105	0	-0.532931	0	-0.40217	0	-0.968223	0	-0.581393	0	-0.300311	0	-0.077606	0	-0.353846	0	-0.468763	2.76751	1.53814	0	-0.0813257	0	-0.17496
634	CEACAM1	carcinoembryonic antigen-related cell adhesion molecule 1 (biliary glycoprotein)	2.11244	0.975989	-1.65642	-1.57327	1.16499	0.865346	0	0.0220105	1.07248	0.288637	1.11261	0.615241	1.20923	0.688158	0.547488	-0.0517123	2.05023	1.01409	0.880351	0.518251	-1.27752	-1.15824	0.950588	0.384672	1.44559	0.16249	-1.32716	-0.873278	0.927425	0.40462
729767	CEACAM18	carcinoembryonic antigen-related cell adhesion molecule 18	1.12986	0.271061	0.153787	-0.311372	0	0.178225	0	0.0220105	0.848981	0.117429	0	-0.40217	1.37915	0.920918	-1.03336	-1.58114	-2.34967	-1.80668	0	-0.077606	0	-0.353846	0	-0.468763	0	-1.34184	-2.32193	-1.46688	0	-0.17496
56971	CEACAM19	carcinoembryonic antigen-related cell adhesion molecule 19	1.61529	0.619317	1.83927	0.863576	0.641354	0.556499	0.257793	0.250083	1.62751	0.713824	0.981932	0.495743	0.79419	0.119646	-0.341481	-0.911767	2.245	1.13896	0.402892	0.195088	-0.245179	-0.508222	1.04009	0.465029	1.54512	0.26607	1.95215	1.08358	1.71279	0.895424
125931	CEACAM20	carcinoembryonic antigen-related cell adhesion molecule 20	2.06494	0.941911	1.50307	0.62921	0.278784	0.342653	1.10531	0.999894	0.757867	0.0476315	0.496193	0.0515662	1.20923	0.688158	1.42884	0.800977	1.1236	0.420025	1.99805	1.27476	1.24335	0.429026	0.887991	0.328473	0.808157	-0.500842	1.49847	0.812852	1.35119	0.669446
90273	CEACAM21	carcinoembryonic antigen-related cell adhesion molecule 21	1.26211	0.365938	-1.93786	-1.76946	1.04521	0.794693	1.09543	0.991151	0.848981	0.117429	0.911048	0.430925	1.01658	0.424276	1.03336	0.418355	1.07265	0.387364	1.64172	1.03358	1.6788	0.703211	1.04097	0.465819	1.54512	0.26607	-2.15497	-1.36725	1.73982	0.912313
1084	CEACAM3	carcinoembryonic antigen-related cell adhesion molecule 3	1.24089	0.350717	1.03134	0.30037	0	0.178225	-0.932801	-0.803249	1.48917	0.607841	0	-0.40217	0.209228	-0.681626	0.547932	-0.0512828	0.920678	0.289934	2.10233	1.34533	0.991471	0.270432	0.806507	0.255317	1.72569	0.45398	0.908237	0.460644	1.23285	0.59549
1089	CEACAM4	carcinoembryonic antigen-related cell adhesion molecule 4	1.34399	0.424679	1.50307	0.62921	1.2692	0.926807	1.43629	1.29271	0.484204	-0.162007	0.0489986	-0.357364	0.79419	0.119646	0.728504	0.123416	-1.05249	-0.975063	1.48321	0.926292	2.10153	0.969377	1.17848	0.589269	1.54512	0.26607	0.923989	0.470044	1.2887	0.630391
27439	CECR6	cat eye syndrome chromosome region, candidate 6	-3.10532	-2.76736	1.40597	0.561521	0.471429	0.456276	-0.847997	-0.728222	0.107997	-0.4502	0.980891	0.494792	0	-0.968223	1.10047	0.483287	1.87673	0.902856	0.608864	0.334498	0.731713	0.106876	1.11136	0.529014	1.63823	0.362963	1.44203	0.779172	0.956476	0.422775
9620	CELSR1	cadherin, EGF LAG seven-pass G-type receptor 1	-2.48543	-2.32263	-0.659782	-0.87851	-2.54856	-1.32493	-0.469332	-0.393213	-0.293714	-0.75793	0.980891	0.494792	1.66866	1.31748	-1.18952	-1.73222	-1.12386	-1.02082	-1.87111	-1.34405	-2.32065	-1.81504	0.719044	0.176793	1.80816	0.539793	-2.99441	-1.86817	0.712093	0.270051
1952	CELSR2	cadherin, EGF LAG seven-pass G-type receptor 2	-1.11346	-1.33835	-2.3491	-2.05613	-2.20979	-1.12512	0.953242	0.865354	-2.38074	-2.35669	0.395929	-0.0401189	1.53116	1.12913	-0.494765	-1.06006	-0.0807209	-0.352061	-0.973689	-0.736637	0.192932	-0.232366	0.888969	0.329351	1.09766	-0.199571	-0.472371	-0.363203	2.46067	1.3628
1951	CELSR3	cadherin, EGF LAG seven-pass G-type receptor 3	-0.433171	-0.850295	-2.2895	-2.01459	-4.04114	-2.20527	1.0357	0.93831	0.271717	-0.324783	-1.67447	-1.93337	1.20923	0.688158	1.4484	0.819893	-2.44819	-1.86984	-2.45917	-1.74207	1.37148	0.509706	1.30327	0.701312	1.09766	-0.199571	-3.16827	-1.97192	-0.957623	-0.773411
51286	CEND1	cell cycle exit and neuronal differentiation 1	0	-0.539528	1.06683	0.325108	0.719356	0.602505	1.0357	0.93831	0	-0.532931	0.173536	-0.243483	1.53116	1.12913	-0.0473057	-0.62716	0.883044	0.265807	0.66771	0.374327	1.52795	0.608227	0.178475	-0.308529	1.09766	-0.199571	0.49847	0.216125	0.366633	0.0541617
221223	CES5A	carboxylesterase 5A	0.141356	-0.438116	1.15758	0.388373	0	0.178225	1.18771	1.07279	0.37116	-0.248605	0.0480054	-0.358272	0	-0.968223	-1.28857	-1.82805	1.09096	0.3991	1.16829	0.71314	0.831715	0.169842	0.12336	-0.358011	0.445587	-0.878145	-3.91997	-2.42048	0.779343	0.312078
1080	CFTR	cystic fibrosis transmembrane conductance regulator (ATP-binding cassette sub-family C, member 7)	0.164076	-0.421816	-1.19451	-1.25127	-3.08681	-1.64239	-1.18636	-1.02758	-1.77888	-1.89564	1.04999	0.557979	0	-0.968223	1.77032	1.13135	-1.48532	-1.25255	-0.230974	-0.233938	2.0531	0.938884	1.03657	0.461864	0.445587	-0.878145	-3.90897	-2.41392	-2.08279	-1.47657
286464	CHDC2	calponin homology domain containing 2	-0.887044	-1.17591	0.480626	-0.0835333	0.372364	0.397847	-1.86224	-1.62553	-0.321513	-0.779226	1.71817	1.16899	0	-0.968223	-0.226004	-0.800046	-3.58297	-2.59735	-1.59475	-1.157	1.50002	0.59064	1.52199	0.897679	2.63823	1.4036	-3.53501	-2.19076	-1.67047	-1.21889
53344	CHIC1	cysteine-rich hydrophobic domain 1	0.422691	-0.236279	-0.759693	-0.948158	0.966762	0.748427	-0.479173	-0.401919	1.38187	0.525647	0.676037	0.216022	0.209228	-0.681626	1.59524	0.961959	1.2886	0.525806	-1.80554	-1.29967	-0.0218388	-0.367597	0.966971	0.399381	1.88616	0.620966	0.849557	0.425628	-2.55545	-1.77195
26511	CHIC2	cysteine-rich hydrophobic domain 2	2.03444	0.920028	1.50386	0.629761	0.285449	0.346584	3.79056	3.37556	1.37116	0.517443	0.981932	0.495743	0	-0.968223	1.77032	1.13135	1.54743	0.691746	0.999381	0.598815	-0.961168	-0.959044	0.888969	0.329351	2.72569	1.49462	-0.85267	-0.590137	0.385823	0.0661543
10752	CHL1	cell adhesion molecule L1-like	2.03444	0.920028	-1.47691	-1.44813	-2.22172	-1.13216	-1.11371	-0.963298	-3.04259	-2.8637	-2.32738	-2.53041	1.37915	0.920918	1.03336	0.418355	-2.36354	-1.81557	-0.430771	-0.369169	0.451321	-0.0696723	1.10968	0.527509	1.72569	0.45398	-3.20212	-1.99212	-1.93083	-1.3816
89832	CHRFAM7A	CHRNA7 (cholinergic receptor, nicotinic, alpha 7, exons 5-10) and FAM7A (family with sequence similarity 7A, exons A-E) fusion	1.24089	0.350717	0.0319508	-0.396304	0	0.178225	0	0.0220105	1.48917	0.607841	0.981412	0.495268	1.34862	0.879093	0.226004	-0.36274	-0.0204694	-0.313434	0	-0.077606	-0.166876	-0.45892	1.30107	0.699335	1.33867	0.0512303	-1.35301	-0.888701	2.06444	1.11518
1128	CHRM1	cholinergic receptor, muscarinic 1	0	-0.539528	0	-0.418577	0	0.178225	0	0.0220105	0.651786	-0.0336314	0	-0.40217	0	-0.968223	-2.32193	-2.8278	0.874615	0.260404	0.962032	0.573536	1.26597	0.443268	0.623587	0.0910913	0.96016	-0.342662	-2.47156	-1.55618	1.68189	0.876112
1129	CHRM2	cholinergic receptor, muscarinic 2	0.945436	0.13875	1.43079	0.578827	-2.44182	-1.26198	-1.62067	-1.41181	1.58672	0.682572	0.758499	0.291428	-0.388355	-1.50019	2.226	1.57221	-1.85723	-1.49098	-1.20961	-0.896319	2.70933	1.35208	0.41406	-0.0970214	0.638232	-0.677672	-0.621276	-0.452058	0.23285	-0.0294438
1131	CHRM3	cholinergic receptor, muscarinic 3	2.1753	1.02109	3.45907	1.99273	-0.715838	-0.243981	-0.050917	-0.0230363	-0.0317892	-0.557283	0.981412	0.495268	0.977204	0.370336	1.64104	1.00627	-1.47551	-1.24626	-2.33307	-1.65672	3.00177	1.53621	1.01707	0.444363	1.41504	0.1307	-2.13616	-1.35603	0.140782	-0.0869801
1132	CHRM4	cholinergic receptor, muscarinic 4	0.778786	0.0191914	-0.0968321	-0.486078	0	0.178225	0.837674	0.76311	-1.34468	-1.56302	0	-0.40217	0.79419	0.119646	1.03336	0.418355	-1.03084	-0.961183	-1.00069	-0.754915	0.960852	0.251153	1.39621	0.784754	1.09766	-0.199571	0.37485	0.142358	1.09861	0.5116
1133	CHRM5	cholinergic receptor, muscarinic 5	-1.19412	-1.39622	0.604522	0.00283424	-1.92735	-0.958537	1.55289	1.39587	1.2043	0.389617	-1.56457	-1.83287	1.01658	0.424276	-1.34375	-1.88143	0.354914	-0.0727764	0.686603	0.387114	-0.247008	-0.509375	0.623587	0.0910913	0.445587	-0.878145	-3.41725	-2.12049	0.915702	0.397294
1134	CHRNA1	cholinergic receptor, nicotinic, alpha 1 (muscle)	0	-0.539528	0.858452	0.179848	0.278784	0.342653	1.62067	1.45583	1.69511	0.765603	-0.714503	-1.05554	0	-0.968223	0.641041	0.0387982	-1.8827	-1.50731	1.24564	0.765491	2.23085	1.0508	-0.0905672	-0.550074	0.445587	-0.878145	-2.32193	-1.46688	0.956476	0.422775
57053	CHRNA10	cholinergic receptor, nicotinic, alpha 10 (neuronal)	1.05889	0.220148	1.00151	0.279576	0.99111	0.762787	-1.1246	-0.972939	0.00868224	-0.52628	0.174447	-0.24265	1.20923	0.688158	0.222392	-0.366234	0.874615	0.260404	-1.23097	-0.910778	-1.2921	-1.16742	0.625934	0.0931991	0	-1.34184	0	-0.0813257	0.577377	0.185863
1135	CHRNA2	cholinergic receptor, nicotinic, alpha 2 (neuronal)	-1.41504	-1.55471	-1.65694	-1.57363	-1.92552	-0.957459	0.180572	0.181765	1.01145	0.241891	0.0480054	-0.358272	1.37915	0.920918	1.34148	0.716456	-1.44278	-1.22528	-1.88515	-1.35355	-1.35778	-1.20877	-1.94166	-2.21198	0	-1.34184	-2.54094	-1.59757	-1.23744	-0.948277
1136	CHRNA3	cholinergic receptor, nicotinic, alpha 3 (neuronal)	0.718665	-0.0239408	1.0311	0.300201	-1.28334	-0.578697	1.77267	1.59031	0.00175619	-0.531586	0	-0.40217	0.531156	-0.240654	0	-0.581393	0.390096	-0.0502211	0.866297	0.508738	1.59647	0.65137	0.419483	-0.0921521	1.63823	0.362963	-2.36694	-1.49375	-0.83422	-0.696292
1137	CHRNA4	cholinergic receptor, nicotinic, alpha 4 (neuronal)	0.918963	0.119758	1.9962	0.972972	2.74117	1.79498	0.648275	0.595547	-1.6395	-1.78887	0	-0.40217	0	-0.968223	1.49902	0.868873	2.5581	1.33968	-0.0324495	-0.0995691	3.27168	1.70616	1.03745	0.462656	1.54512	0.26607	-0.996766	-0.676123	2.04828	1.10508
1138	CHRNA5	cholinergic receptor, nicotinic, alpha 5 (neuronal)	1.23017	0.343022	1.91246	0.914598	0.714657	0.599734	0.673134	0.61754	1.07578	0.291166	1.28901	0.77655	0.79419	0.119646	0.226004	-0.36274	0.694085	0.144666	0.230974	0.0787263	-0.0395051	-0.37872	1.24261	0.646845	2.39312	1.14853	1.57659	0.859469	0.855283	0.359536
8973	CHRNA6	cholinergic receptor, nicotinic, alpha 6 (neuronal)	2.32898	1.13134	2.45243	1.29101	-0.91814	-0.3633	1.32521	1.19444	1.45154	0.579016	0.495464	0.0509001	0.503704	-0.278257	0.226004	-0.36274	2.12892	1.06454	2.45133	1.58155	-0.203796	-0.482166	-1.07664	-1.43537	0.638232	-0.677672	-1.06606	-0.717473	2.07231	1.1201
1139	CHRNA7	cholinergic receptor, nicotinic, alpha 7 (neuronal)	0.733932	-0.0129881	0	-0.418577	0	0.178225	0	0.0220105	1.32507	0.482138	0.981412	0.495268	0.997028	0.39749	0.448396	-0.147581	0.07264	-0.253742	0	-0.077606	-0.0513992	-0.38621	1.36079	0.752948	1.22319	-0.0689394	-1.36643	-0.896711	2.18218	1.18876
55584	CHRNA9	cholinergic receptor, nicotinic, alpha 9 (neuronal)	0	-0.539528	0.573234	-0.0189765	0.558892	0.507862	0.392056	0.368867	0.00868224	-0.52628	0	-0.40217	1.53116	1.12913	0	-0.581393	1.78717	0.845443	0	-0.077606	0.915902	0.22285	1.04097	0.465819	1.44559	0.16249	-4.53204	-2.78572	1.31136	0.644556
1140	CHRNB1	cholinergic receptor, nicotinic, beta 1 (muscle)	1.85756	0.793132	-1.20757	-1.26037	-2.72326	-1.42797	-1.48359	-1.29054	0.766065	0.0539116	0.758499	0.291428	1.65625	1.30048	1.03336	0.418355	1.10544	0.408383	-0.457571	-0.387308	-1.61347	-1.36976	-1.83062	-2.11229	0.638232	-0.677672	1.7992	0.992308	1.83356	0.970893
1141	CHRNB2	cholinergic receptor, nicotinic, beta 2 (neuronal)	1.81513	0.762688	3.10909	1.74877	0.705212	0.594163	-1.84857	-1.61344	1.12084	0.325685	0.397489	-0.0386919	1.53116	1.12913	1.49902	0.868873	0.633906	0.106085	2.65915	1.72221	2.26256	1.07077	0.29075	-0.207729	1.96016	0.697973	2.56844	1.45133	2.29091	1.25671
1142	CHRNB3	cholinergic receptor, nicotinic, beta 3 (neuronal)	1.67978	0.665583	2.615	1.40434	-0.283843	0.0108119	0	0.0220105	-0.853903	-1.18706	-2.21198	-2.42488	0.503704	-0.278257	0.641041	0.0387982	1.95121	0.950606	1.21613	0.745518	1.77277	0.762374	-0.385654	-0.815003	0.808157	-0.500842	-2.60727	-1.63715	2.21848	1.21144
1143	CHRNB4	cholinergic receptor, nicotinic, beta 4 (neuronal)	1.32395	0.410303	1.1568	0.387828	-2.46465	-1.27544	0.77267	0.7056	1.49164	0.609736	0	-0.40217	0.79419	0.119646	0	-0.581393	-1.84702	-1.48443	0.167299	0.0356287	1.59647	0.65137	1.41948	0.805646	1.09766	-0.199571	-1.65242	-1.06737	1.02384	0.464875
1144	CHRND	cholinergic receptor, nicotinic, delta (muscle)	-0.671871	-1.02154	0	-0.418577	-2.57107	-1.33821	-2.45165	-2.14699	0	-0.532931	0.8388	0.364859	1.37915	0.920918	-0.436099	-1.00331	-3.32446	-2.43162	-1.58333	-1.14927	0.986892	0.267549	0	-0.468763	-1.44559	-2.84617	0	-0.0813257	0.00721957	-0.170448
1145	CHRNE	cholinergic receptor, nicotinic, epsilon (muscle)	0.666576	-0.0613104	0.82124	0.153909	-2.34427	-1.20444	0.953242	0.865354	0.133568	-0.430612	1.28901	0.77655	1.20923	0.688158	1.10047	0.483287	0.713119	0.156868	-1.41788	-1.03729	0.127258	-0.273718	1.28074	0.681079	1.09766	-0.199571	-0.685426	-0.490338	0.915702	0.397294
1146	CHRNG	cholinergic receptor, nicotinic, gamma (muscle)	-0.507795	-0.903832	0	-0.418577	0.278784	0.342653	-0.611315	-0.518827	-1.44857	-1.64261	0	-0.40217	1.37915	0.920918	0.347923	-0.244786	-1.2566	-1.10592	-2.29495	-1.63092	0.520802	-0.0259241	0	-0.468763	-1.44559	-2.84617	-2.36082	-1.49009	0.539479	0.162179
10970	CKAP4	cytoskeleton-associated protein 4	1.77141	0.731321	1.18424	0.406955	1.32941	0.962319	0.357425	0.338228	0.770147	0.0570384	1.49546	0.965336	1.37915	0.920918	0.810966	0.203196	-2.52108	-1.91657	-0.37707	-0.332822	-0.141457	-0.442915	2.03789	1.36085	1.09766	-0.199571	0.477275	0.203477	-1.5545	-1.14642
51192	CKLF	chemokine-like factor	1.75653	0.720651	-1.27981	-1.31073	0.171868	0.279594	-0.29956	-0.243014	1.13357	0.335437	1.18486	0.68131	0.531156	-0.240654	1.03336	0.418355	0.694085	0.144666	0.335114	0.149213	-3.044	-2.2705	0.240094	-0.253207	1.54512	0.26607	0.816183	0.405713	0.8115	0.332174
100529251	CKLF-CMTM1	CKLF-CMTM1 readthrough	NA	NA	0	-0.418577	NA	NA	0	0.0220105	NA	NA	NA	NA	NA	NA	0	-0.581393	NA	NA	NA	NA	NA	NA	NA	NA	NA	NA	0	-0.0813257	NA	NA
9635	CLCA2	chloride channel accessory 2	1.4587	0.506976	1.5729	0.677889	-3.33438	-1.78841	0	0.0220105	0.852835	0.120382	-2.34879	-2.54999	0.77135	0.0883605	1.92644	1.28239	-4.34967	-3.08888	-3.30307	-2.31326	0.947956	0.243033	0.0409718	-0.431979	0.638232	-0.677672	-0.0885985	-0.134195	-1.71142	-1.24449
22802	CLCA4	chloride channel accessory 4	1.38324	0.452845	1.32763	0.506913	-2.32193	-1.19126	1.62067	1.45583	0.931041	0.180291	0.980891	0.494792	1.65625	1.30048	1.39593	0.769133	-2.45702	-1.8755	-2.32193	-1.64918	0.808625	0.155303	0	-0.468763	1.44559	0.16249	-0.362115	-0.29741	-1.71142	-1.24449
1180	CLCN1	chloride channel, voltage-sensitive 1	1.23017	0.343022	1.09602	0.345455	-3.80423	-2.06553	1.26404	1.14032	0.133568	-0.430612	0	-0.40217	0.820873	0.156195	2.226	1.57221	-1.63221	-1.34672	0.825728	0.48128	2.89111	1.46654	0.886033	0.326716	0	-1.34184	-2.64359	-1.65883	-1.01057	-0.806496
1181	CLCN2	chloride channel, voltage-sensitive 2	2.24622	1.07197	0.0541301	-0.380843	1.05639	0.801291	1.84999	1.65872	4.46793	2.88971	2.01662	1.4419	1.37915	0.920918	-0.726691	-1.28445	2.30762	1.1791	5.47357	3.62712	4.3434	2.38097	1.66869	1.02939	1.72569	0.45398	1.54638	0.841442	3.38577	1.94092
1182	CLCN3	chloride channel, voltage-sensitive 3	-1.57506	-1.66952	-2.43592	-2.11665	-1.18862	-0.522834	-0.400703	-0.332496	0.774217	0.0601563	0.758499	0.291428	0.997028	0.39749	-1.50901	-2.04132	-1.62275	-1.34065	-3.06862	-2.15457	-2.5999	-1.99087	1.47197	0.852773	1.32193	0.0338067	1.58652	0.865396	-3.2264	-2.19125
1184	CLCN5	chloride channel, voltage-sensitive 5	1.94544	0.856174	1.96535	0.951467	-2.17242	-1.10308	1.28174	1.15598	1.01718	0.246276	0.980891	0.494792	1.36397	0.900116	-1.05611	-1.60315	-0.543292	-0.648615	-2.50229	-1.77126	2.22813	1.04909	1.41813	0.80443	2.28209	1.03298	-1.08229	-0.727158	-1.93209	-1.38239
1187	CLCNKA	chloride channel, voltage-sensitive Ka	0.0709665	-0.488615	-1.0059	-1.11979	0.471429	0.456276	1.07692	0.974775	0	-0.532931	0.980891	0.494792	1.01658	0.424276	0	-0.581393	0	-0.300311	0.785071	0.453761	1.64771	0.68363	1.3622	0.754213	0.638232	-0.677672	-1.74751	-1.12411	1.76299	0.926794
1188	CLCNKB	chloride channel, voltage-sensitive Kb	0	-0.539528	-3.06424	-2.55465	0.171868	0.279594	-2.15842	-1.88757	0.589031	-0.081705	0.836501	0.362756	1.66866	1.31748	0.448396	-0.147581	-0.895742	-0.87457	0.102761	-0.00805337	1.38197	0.516309	0.887991	0.328473	1.44559	0.16249	1.34438	0.720902	2.31136	1.26949
9076	CLDN1	claudin 1	2.48149	1.24075	1.99807	0.974275	-1.81169	-0.89032	0.187044	0.187491	4.00025	2.53145	1.54524	1.01085	0	-0.968223	1.39593	0.769133	1.54672	0.691288	4.41878	2.9132	3.36492	1.76487	1.35938	0.751682	0.808157	-0.500842	1.54638	0.841442	0.458982	0.111874
9071	CLDN10	claudin 10	1.21936	0.335269	1.7421	0.795838	1.90015	1.29894	-0.82199	-0.705214	0.669376	-0.0201568	0.912686	0.432423	1.01658	0.424276	0.547932	-0.0512828	1.50417	0.664013	-0.0920928	-0.139938	-0.478908	-0.65539	0.431639	-0.0812384	1.22319	-0.0689394	1.00961	0.521135	0.956476	0.422775
5010	CLDN11	claudin 11	2.35883	1.15275	2.171	1.09482	0.994991	0.765076	1.90159	1.70436	3.44445	2.10569	1.39944	0.877526	0.79419	0.119646	1.03336	0.418355	-0.247709	-0.459117	4.67961	3.08974	4.20726	2.29525	1.61711	0.983075	1.09766	-0.199571	0.923989	0.470044	2.56789	1.4298
9069	CLDN12	claudin 12	1.71097	0.687963	1.35422	0.525447	1.50498	1.06587	2.89103	2.57974	2.83736	1.64062	1.94693	1.37817	1.20923	0.688158	2.54793	1.88367	2.22014	1.12302	2.08524	1.33377	1.48115	0.578757	1.52262	0.898245	1.88616	0.620966	2.23333	1.25136	0.699183	0.261983
23562	CLDN14	claudin 14	1.81513	0.762688	1.61724	0.708797	-1.48893	-0.699957	-0.187707	-0.144056	0.848981	0.117429	0	-0.40217	1.31742	0.836363	-2.3771	-2.88118	0	-0.300311	0.230974	0.0787263	1.15212	0.371584	1.17768	0.588551	1.22319	-0.0689394	0.592752	0.272386	0.855283	0.359536
24146	CLDN15	claudin 15	0	-0.539528	1.66049	0.738948	2.19261	1.47144	1.15598	1.04472	2.61622	1.47122	1.98193	1.41018	1.37915	0.920918	2.4484	1.78737	2.5751	1.35058	1.55815	0.977012	1.92461	0.857983	2.03833	1.36125	1.54512	0.26607	-0.745337	-0.526089	-0.941258	-0.763184
10686	CLDN16	claudin 16	2.44485	1.21446	-2.34062	-2.05022	1.32941	0.962319	0.0619967	0.0768597	3.99071	2.52414	1.39905	0.877169	0	-0.968223	1.10047	0.483287	-1.20732	-1.07433	2.13741	1.36908	3.71507	1.98534	0.520101	-0.00181746	0.96016	-0.342662	0.717853	0.347037	3.22805	1.84236
26285	CLDN17	claudin 17	0.20847	-0.389967	0.820818	0.153614	-3.89058	-2.11646	0.865779	0.787975	0.146186	-0.420946	0	-0.40217	0	-0.968223	0.962969	0.350255	0.509628	0.0264106	1.59545	1.00226	-0.877081	-0.906099	0	-0.468763	1.44559	0.16249	2.10177	1.17286	0.8115	0.332174
51208	CLDN18	claudin 18	1.15276	0.28749	0.964396	0.253702	-1.20664	-0.533461	0.479687	0.446395	2.88661	1.67835	1.3971	0.875387	1.20923	0.688158	0	-0.581393	0.936961	0.300373	3.687	2.4179	2.55081	1.25227	0.79612	0.245991	0	-1.34184	0	-0.0813257	1.16969	0.556022
149461	CLDN19	claudin 19	1.53912	0.56467	1.27232	0.468357	0	0.178225	0	0.0220105	1.42879	0.56159	1.11214	0.614807	0	-0.968223	0	-0.581393	0.360221	-0.069374	1.08568	0.657227	3.2645	1.70164	1.3629	0.754845	0.445587	-0.878145	0.14521	0.00532516	2.52214	1.40121
9075	CLDN2	claudin 2	0.449478	-0.217062	0.216521	-0.26764	1.05267	0.799097	0	0.0220105	1.13357	0.335437	0.885957	0.407981	1.01658	0.424276	1.34148	0.716456	-0.917317	-0.888402	1.13547	0.690927	1.16789	0.381513	0	-0.468763	0	-1.34184	0.631641	0.295592	-2.09491	-1.48414
49861	CLDN20	claudin 20	0	-0.539528	0.326641	-0.190876	0.850955	0.680123	0	0.0220105	0.593645	-0.0781707	0.980891	0.494792	0	-0.968223	0.448396	-0.147581	1.16911	0.449203	0	-0.077606	0	-0.353846	1.41948	0.805646	1.22319	-0.0689394	1.15366	0.607096	1.19927	0.574503
53842	CLDN22	claudin 22	0.527629	-0.160994	0	-0.418577	-0.379414	-0.0455559	0	0.0220105	-0.0673446	-0.58452	0	-0.40217	0	-0.968223	-0.728504	-1.2862	-0.442782	-0.584179	-1.31905	-0.970389	-0.373327	-0.588911	0.416774	-0.0945845	-0.459432	-1.81994	0	-0.0813257	0.11422	-0.10358
137075	CLDN23	claudin 23	-0.730539	-1.06363	-0.699421	-0.906142	-1.91121	-0.949021	0.82199	0.749235	-0.344234	-0.796631	0.258669	-0.165634	1.53116	1.12913	0.888969	0.278662	-1.47723	-1.24736	-2.02426	-1.44771	-2.79208	-2.11187	-1.15918	-1.50947	0.777608	-0.532633	1.36334	0.732218	0.609569	0.205981
100132463	CLDN24	claudin 24	-0.430862	-0.848639	0	-0.418577	-0.379414	-0.0455559	0	0.0220105	-0.200913	-0.68684	0	-0.40217	0	-0.968223	-0.728504	-1.2862	-0.442782	-0.584179	-1.31905	-0.970389	-0.373327	-0.588911	0	-0.468763	-1.09766	-2.48411	0	-0.0813257	0	-0.17496
644672	CLDN25	claudin 25	-2.45686	-2.30214	0	-0.418577	0	0.178225	0	0.0220105	0.494109	-0.15442	0	-0.40217	0.447182	-0.35568	2.03336	1.38583	0.0121757	-0.292505	0	-0.077606	0.640889	0.0496884	0.458275	-0.0573254	-0.96016	-2.34102	-0.587588	-0.431956	0.52412	0.152581
1365	CLDN3	claudin 3	1.03444	0.202604	1.55017	0.662041	0.784415	0.640877	1.89295	1.69672	0.464189	-0.17734	1.34508	0.827819	1.89917	1.63323	1.1646	0.545331	1.65998	0.763898	1.76375	1.11617	0.434946	-0.079983	1.47002	0.851014	0	-1.34184	1.92399	1.06677	1.57738	0.810797
1364	CLDN4	claudin 4	1.95198	0.860868	1.7228	0.782387	2.61866	1.72273	0.522083	0.483903	1.53037	0.639405	1.44806	0.921989	1.5175	1.11042	1.34148	0.716456	2.59062	1.36054	0.0406571	-0.0500876	0.962619	0.252266	1.76024	1.11157	0.445587	-0.878145	1.26459	0.673292	1.73982	0.912313
7122	CLDN5	claudin 5	1.77141	0.731321	-1.16823	-1.23295	-3.58527	-1.93639	-0.795073	-0.6814	1.46167	0.586776	0.0480054	-0.358272	0	-0.968223	1.03336	0.418355	1.54743	0.691746	0.48126	0.24813	1.4867	0.58225	1.04009	0.465029	2.59243	1.35593	1.26916	0.676014	0.66439	0.24024
9074	CLDN6	claudin 6	-2.55037	-2.36922	1.71926	0.779915	0	0.178225	-0.450742	-0.376766	0	-0.532931	0	-0.40217	1.20923	0.688158	1.4484	0.819893	1.2886	0.525806	0.230974	0.0787263	1.04227	0.302415	1.23878	0.643407	0.223194	-1.10957	0	-0.0813257	2.59228	1.44505
1366	CLDN7	claudin 7	0.607019	-0.104038	-0.539382	-0.794579	-2.96559	-1.5709	0.187707	0.188077	1.43651	0.567508	1.04801	0.556163	1.20923	0.688158	1.10047	0.483287	0.620009	0.0971761	-2.30587	-1.63831	-1.63525	-1.38348	-0.821833	-1.2066	0.638232	-0.677672	1.09043	0.569363	1.59596	0.82241
9073	CLDN8	claudin 8	1.43086	0.487007	0.616832	0.011416	-2.22991	-1.13699	0.206451	0.20466	1.54474	0.65041	0	-0.40217	0.174831	-0.728742	0.728504	0.123416	1.40773	0.602182	1.03411	0.622322	1.61959	0.665927	1.3622	0.754213	0.808157	-0.500842	0.979775	0.503333	0.984954	0.440572
9080	CLDN9	claudin 9	1.16408	0.295608	1.9796	0.961398	0.93086	0.727252	0.503725	0.467662	0.376525	-0.244495	0.676679	0.21661	1.37915	0.920918	0.962969	0.350255	1.79389	0.849751	0.230974	0.0787263	1.33094	0.484178	1.17447	0.585674	0.223194	-1.10957	1.28463	0.685248	2.15737	1.17325
56650	CLDND1	claudin domain containing 1	2.1697	1.01707	1.57273	0.677772	-2.19922	-1.11889	1.18771	1.07279	2.68662	1.52515	0.280613	-0.145568	-0.531156	-1.69579	1.49902	0.868873	1.34787	0.563807	3.522	2.30623	2.00591	0.909169	0.94537	0.379987	1.22319	-0.0689394	0.816183	0.405713	1.47682	0.747956
125875	CLDND2	claudin domain containing 2	0.836501	0.0605979	1.87616	0.889292	0	0.178225	0.112181	0.121258	1.00176	0.234462	0	-0.40217	1.66866	1.31748	-0.392317	-0.96095	0.401875	-0.0426697	1.90526	1.21195	1.42673	0.544495	1.3622	0.754213	0.808157	-0.500842	0.477275	0.203477	1.2564	0.61021
10462	CLEC10A	C-type lectin domain family 10, member A	0.945436	0.13875	0.380899	-0.153053	0.863746	0.687667	1.11371	1.00732	1.07578	0.291166	0.910502	0.430425	1.01658	0.424276	0.341481	-0.251019	0.413559	-0.0351794	0	-0.077606	0.912161	0.220495	-0.415257	-0.841581	1.33867	0.0512303	0.849557	0.425628	1.05103	0.481868
160364	CLEC12A	C-type lectin domain family 12, member A	1.93226	0.846722	1.63759	0.722983	1.37236	0.987654	1.42435	1.28215	1.7143	0.780305	0.495464	0.0509001	1.01658	0.424276	1.92644	1.28239	-1.41921	-1.21016	1.40346	0.872314	2.67735	1.33194	0.280736	-0.216719	1.88616	0.620966	0.816183	0.405713	1.77286	0.932961
387837	CLEC12B	C-type lectin domain family 12, member B	1.82229	0.767824	1.7008	0.767049	0.366384	0.39432	0.176854	0.178475	-0.823757	-1.16397	0.980891	0.494792	1.37915	0.920918	1.34148	0.716456	0.413559	-0.0351794	2.19957	1.41115	2.35598	1.12959	-1.64222	-1.94315	1.22319	-0.0689394	0	-0.0813257	1.77286	0.932961
161198	CLEC14A	C-type lectin domain family 14, member A	-2.45286	-2.29927	0.695198	0.0660448	0.465847	0.452984	-2.61158	-2.28848	1.42102	0.55564	0.676037	0.216022	0.79419	0.119646	1.2849	0.661713	2.78509	1.48521	-1.62749	-1.17916	-1.37912	-1.22221	1.17607	0.587114	1.80816	0.539793	-2.09493	-1.33143	0.8115	0.332174
388512	CLEC17A	C-type lectin domain family 17, member A	0.2726	-0.343958	0.213521	-0.269732	0	0.178225	0	0.0220105	0.841243	0.111501	0	-0.40217	1.5175	1.11042	1.59524	0.961959	0.614958	0.0939377	0	-0.077606	3.00647	1.53918	0	-0.468763	1.22319	-0.0689394	0	-0.0813257	2.53369	1.40843
51267	CLEC1A	C-type lectin domain family 1, member A	-1.926	-1.92129	1.57139	0.676839	1.55364	1.09457	1.54188	1.38613	0.984294	0.221085	0.495464	0.0509001	1.53116	1.12913	-0.566139	-1.12912	0.245526	-0.142905	2.09381	1.33957	2.71793	1.35749	0.477134	-0.0403938	1.33867	0.0512303	1.15366	0.607096	0.699183	0.261983
51266	CLEC1B	C-type lectin domain family 1, member B	-0.960107	-1.22833	1.54855	0.660916	0	0.178225	1.2279	1.10835	1.30833	0.469312	1.11214	0.614807	0.209228	-0.681626	1.49902	0.868873	0.842937	0.240095	1.97968	1.26232	3.10208	1.59938	0.29781	-0.20139	0.223194	-1.10957	0	-0.0813257	0.23285	-0.0294438
387836	CLEC2A	C-type lectin domain family 2, member A	0.996966	0.175719	0	-0.418577	-2.50925	-1.30175	0.26359	0.255211	1.12084	0.325685	1.04801	0.556163	0.531156	-0.240654	1.49902	0.868873	0.272646	-0.125518	2.19957	1.41115	2.71578	1.35614	-0.608232	-1.01483	0.445587	-0.878145	0.37485	0.142358	0.484777	0.127994
9976	CLEC2B	C-type lectin domain family 2, member B	1.2726	0.373466	1.45252	0.593976	-1.68511	-0.815665	1.17351	1.06023	1.05251	0.27334	1.67604	1.13046	1.01658	0.424276	1.96297	1.31773	-1.88866	-1.51113	0.386055	0.183691	2.07436	0.952272	0.570243	0.0431996	2.54512	1.30671	-2.59806	-1.63166	-0.735653	-0.634694
29121	CLEC2D	C-type lectin domain family 2, member D	1.09481	0.245917	-1.3544	-1.36273	1.2197	0.89761	1.10869	1.00288	-1.71267	-1.84492	1.28901	0.77655	0.79419	0.119646	2.19563	1.54282	0.778162	0.198568	1.47867	0.92322	2.06208	0.944541	-1.94114	-2.21152	1.54512	0.26607	-1.64513	-1.06302	1.05103	0.481868
154790	CLEC2L	C-type lectin domain family 2, member L	2.19198	1.03305	1.09602	0.345455	0.859495	0.68516	2.14553	1.92018	1.96505	0.972393	0.591304	0.138539	0.142801	-0.772617	2.19563	1.54282	1.73208	0.810122	1.45757	0.908936	2.47566	1.20495	1.80444	1.15125	1.09766	-0.199571	0.347581	0.126085	1.59596	0.82241
50856	CLEC4A	C-type lectin domain family 4, member A	1.26211	0.365938	1.35247	0.524226	1.16155	0.863312	0.873878	0.79514	1.30833	0.469312	0.0480054	-0.358272	1.01658	0.424276	2.1646	1.51281	1.08366	0.394423	0.757892	0.435366	2.61195	1.29076	1.04097	0.465819	1.22319	-0.0689394	0.419981	0.169289	2.03208	1.09496
170482	CLEC4C	C-type lectin domain family 4, member C	-1.59287	-1.68229	1.50202	0.628476	-1.32903	-0.605648	0.792924	0.723519	0.556315	-0.106767	0	-0.40217	0.209228	-0.681626	1.92644	1.28239	1.6048	0.728526	-0.891851	-0.681247	2.14139	0.994476	0	-0.468763	1.22319	-0.0689394	-3.92434	-2.42308	1.33368	0.658502
338339	CLEC4D	C-type lectin domain family 4, member D	1.2726	0.373466	1.63775	0.723094	1.42275	1.01737	1.2279	1.10835	1.12084	0.325685	0.758499	0.291428	1.53116	1.12913	2.06731	1.41867	0.778162	0.198568	1.19341	0.730142	2.86875	1.45246	0.419483	-0.0921521	1.72569	0.45398	-2.69029	-1.68669	1.95074	1.04413
26253	CLEC4E	C-type lectin domain family 4, member E	1.09481	0.245917	-1.04367	-1.14611	0.788893	0.643519	0.627595	0.577251	-1.91466	-1.99965	0	-0.40217	0.531156	-0.240654	1.64104	1.00627	1.28224	0.521729	-0.332445	-0.302618	2.10639	0.97244	0.966971	0.399381	1.33867	0.0512303	-1.43683	-0.93872	2.03208	1.09496
165530	CLEC4F	C-type lectin domain family 4, member F	1.73393	0.704436	0.894995	0.205323	-3.97207	-2.16453	1.37426	1.23783	0	-0.532931	0.910502	0.430425	1.01658	0.424276	1.4484	0.819893	-0.859535	-0.851358	0.205427	0.061435	1.17102	0.383486	1.24107	0.645471	1.54512	0.26607	-3.32193	-2.06361	-0.895003	-0.734278
339390	CLEC4G	C-type lectin domain family 4, member G	0.430862	-0.230417	0.964524	0.253791	0.0563912	0.211484	1.43629	1.29271	0.271717	-0.324783	0	-0.40217	0.503704	-0.278257	1.59524	0.961959	0	-0.300311	1.30587	0.806259	1.49922	0.590133	0	-0.468763	2.28209	1.03298	-2.32193	-1.46688	-1.19551	-0.922076
10332	CLEC4M	C-type lectin domain family 4, member M	0.0709665	-0.488615	-1.86282	-1.71715	0	0.178225	0.229652	0.225186	-3.3493	-3.09866	0	-0.40217	0.77135	0.0883605	1.1646	0.545331	-2.15894	-1.6844	1.68772	1.06471	1.97151	0.887512	0	-0.468763	1.88616	0.620966	-3.32193	-2.06361	-1.54476	-1.14033
23601	CLEC5A	C-type lectin domain family 5, member A	1.46786	0.513547	1.18713	0.408973	0.859495	0.68516	1.824	1.63573	0.923731	0.174691	1.11404	0.616544	0.142801	-0.772617	2.36896	1.71052	1.85761	0.8906	0.430771	0.213957	2.62155	1.29681	1.66983	1.03041	1.88616	0.620966	-1.44485	-0.943506	1.50458	0.765305
93978	CLEC6A	C-type lectin domain family 6, member A	1.49499	0.533015	0.656945	0.0393783	0.158089	0.271466	0	0.0220105	-1.04098	-1.33037	0.588574	0.136043	1.20923	0.688158	1.59524	0.961959	0.137754	-0.211997	0.997117	0.597283	2.27379	1.07784	0	-0.468763	1.63823	0.362963	-2.2315	-1.41292	1.45663	0.735337
64581	CLEC7A	C-type lectin domain family 7, member A	1.99062	0.888593	2.06404	1.02026	-1.81596	-0.892837	1.7516	1.57167	1.05585	0.275904	0.588574	0.136043	1.53116	1.12913	2.1646	1.51281	0.866137	0.254968	2.09381	1.33957	2.69778	1.34481	0.017702	-0.452871	1.96016	0.697973	0	-0.0813257	1.19927	0.574503
283420	CLEC9A	C-type lectin domain family 9, member A	1.57347	0.589315	1.37841	0.542313	-1.11971	-0.482188	1.84603	1.65522	1.31113	0.47146	-1.46467	-1.74152	1.20923	0.688158	1.77032	1.13135	-1.23312	-1.09086	1.60261	1.00711	1.58788	0.645957	0.410019	-0.100649	1.63823	0.362963	0.49847	0.216125	-1.46264	-1.08901
160365	CLECL1	C-type lectin-like 1	0.778786	0.0191914	1.32605	0.505807	1.2197	0.89761	1.00041	0.907085	1.05251	0.27334	-1.30079	-1.59166	1.53116	1.12913	2.06731	1.41867	1.22014	0.481921	1.57048	0.985357	2.6853	1.33695	0.358739	-0.146688	1.72569	0.45398	0.650699	0.306964	1.67495	0.871776
79789	CLMN	calmin (calponin-like, transmembrane)	1.5304	0.558416	-2.11177	-1.89069	-1.91676	-0.95229	-0.982216	-0.846967	-0.925815	-1.24215	-2.52259	-2.70892	1.79419	1.48943	1.10047	0.483287	1.66487	0.767037	0.401267	0.193988	-0.602787	-0.73339	0.552835	0.0275705	1.22319	-0.0689394	0.799203	0.39558	-1.45061	-1.08149
79827	CLMP	CXADR-like membrane protein	0.467857	-0.203877	-0.190772	-0.551564	0.859495	0.68516	1.26107	1.13769	1.38453	0.527688	1.54312	1.00892	1.33311	0.857843	1.34148	0.716456	0.773636	0.195666	0.197775	0.0562563	1.34953	0.495881	1.47328	0.853944	0.765535	-0.545196	-3.50667	-2.17385	0.484777	0.127994
1201	CLN3	ceroid-lipofuscinosis, neuronal 3	-0.929033	-1.20604	2.92092	1.61759	-2.18085	-1.10805	-0.648275	-0.551526	1.20128	0.387304	1.28943	0.776934	0.79419	0.119646	1.10047	0.483287	1.91231	0.925671	1.32618	0.820008	0.463187	-0.0622011	1.24107	0.645471	1.63823	0.362963	0.699667	0.336185	1.23285	0.59549
1209	CLPTM1	cleft lip and palate associated transmembrane protein 1	3.31128	1.83606	1.80134	0.837135	-0.972955	-0.395631	0.565665	0.52246	1.74065	0.800494	1.17445	0.671786	1.01658	0.424276	-1.26849	-1.80862	-0.00759638	-0.305181	-1.49093	-1.08673	0.610187	0.0303572	1.06978	0.49168	0.353637	-0.973832	-1.50574	-0.979845	2.37938	1.312
81037	CLPTM1L	CLPTM1-like	4.2112	2.48169	2.93018	1.62405	1.84499	1.26641	-0.143767	-0.105181	3.92688	2.47525	2.42242	1.81298	1.37915	0.920918	1.54432	0.912698	4.47093	2.566	2.24894	1.44457	3.63658	1.93592	2.03921	1.36204	3.05889	1.84135	2.3348	1.31191	3.0402	1.72497
7401	CLRN1	clarin 1	2.26211	1.08336	1.52534	0.644736	-1.88969	-0.936326	1.22485	1.10565	2.9971	1.76299	1.1749	0.672202	0.531156	-0.240654	0	-0.581393	0.0948592	-0.239497	3.8823	2.55009	3.00353	1.53732	1.8008	1.14799	0	-1.34184	0	-0.0813257	-0.462978	-0.46429
645104	CLRN2	clarin 2	0	-0.539528	0	-0.418577	0	0.178225	0	0.0220105	0.00868224	-0.52628	0	-0.40217	0	-0.968223	-1.09592	-1.64167	1.08	0.392076	0	-0.077606	0.714364	0.0959522	1.41881	0.805038	1.63823	0.362963	-0.497329	-0.378095	1.02384	0.464875
119467	CLRN3	clarin 3	-0.141356	-0.64094	0.572732	-0.0193262	0	0.178225	0.865779	0.787975	0	-0.532931	0.735145	0.270073	0.79419	0.119646	0.884523	0.27436	0.708384	0.153833	1.64232	1.03398	1.82463	0.79503	0	-0.468763	0.223194	-1.10957	0.979775	0.503333	1.0882	0.505097
22883	CLSTN1	calsyntenin 1	1.23017	0.343022	0.854381	0.177011	-3.48277	-1.87594	-0.900178	-0.774387	1.43651	0.567508	-0.347923	-0.720324	1.37915	0.920918	1.2849	0.661713	1.558	0.698521	-0.457571	-0.387308	0.269455	-0.184184	-0.551313	-0.963731	1.63823	0.362963	-0.62491	-0.454226	-1.26054	-0.962717
64084	CLSTN2	calsyntenin 2	-1.47135	-1.59511	-0.0391338	-0.445857	-1.50734	-0.710815	0.958839	0.870306	0.695915	0.00017288	1.29027	0.777703	0	-0.968223	0.888969	0.278662	1.44826	0.628168	-0.56037	-0.456887	3.16056	1.63619	1.23417	0.639269	1.72569	0.45398	-4.33175	-2.6662	1.80825	0.955076
9746	CLSTN3	calsyntenin 3	2.03444	0.920028	-0.744995	-0.937911	-1.07544	-0.456075	0.285742	0.27481	1.71218	0.778681	1.09954	0.603285	1.20923	0.688158	2.34148	1.68393	1.55537	0.696832	1.7632	1.1158	3.33678	1.74715	0.806507	0.255317	1.54512	0.26607	0.631641	0.295592	0.137156	-0.0892462
1240	CMKLR1	chemokine-like receptor 1	1.28302	0.380939	0.820959	0.153712	-1.92109	-0.954848	1.09543	0.991151	1.43908	0.569474	1.17354	0.670953	1.01658	0.424276	0.810966	0.203196	-0.93841	-0.901925	-0.37707	-0.332822	1.51902	0.602605	-0.963257	-1.33357	1.63823	0.362963	0	-0.0813257	0.52412	0.152581
113540	CMTM1	CKLF-like MARVEL transmembrane domain containing 1	1.49499	0.533015	0.056324	-0.379313	0.93086	0.727252	0.566219	0.522951	1.43137	0.563566	0.496193	0.0515662	0.531156	-0.240654	1.03336	0.418355	1.01984	0.353507	0.102761	-0.00805337	-0.487214	-0.66062	-0.0647602	-0.526905	1.22319	-0.0689394	0.612327	0.284067	0.8115	0.332174
123920	CMTM3	CKLF-like MARVEL transmembrane domain containing 3	1.63168	0.631079	0.00160597	-0.417457	1.17187	0.8694	-1.1375	-0.984352	1.26015	0.432408	1.39632	0.874674	0.79419	0.119646	0.728504	0.123416	1.50963	0.667509	0.483882	0.249905	-1.59414	-1.35759	-0.56726	-0.978049	1.09766	-0.199571	1.0764	0.560993	-1.34443	-1.01514
146223	CMTM4	CKLF-like MARVEL transmembrane domain containing 4	1.92563	0.841963	-0.0547549	-0.456746	0.278784	0.342653	-0.36257	-0.298759	1.76607	0.81996	0.759106	0.291983	1.01658	0.424276	0.547932	-0.0512828	1.60989	0.731787	0.212313	0.0660961	-3.07079	-2.28737	-0.152223	-0.605429	1.44559	0.16249	0.994768	0.51228	0.614305	0.20894
116173	CMTM5	CKLF-like MARVEL transmembrane domain containing 5	1.486	0.526567	1.5724	0.677539	0	0.178225	-0.844051	-0.724731	-1.21574	-1.46424	0.588574	0.136043	0	-0.968223	1.1646	0.545331	1.31086	0.540082	1.0684	0.645529	2.04055	0.930985	0.178475	-0.308529	1.22319	-0.0689394	1.30883	0.699687	0.885809	0.378612
54918	CMTM6	CKLF-like MARVEL transmembrane domain containing 6	2.81513	1.48011	0.0895805	-0.35613	0.640286	0.555869	-1.37426	-1.19381	-0.483675	-0.903449	-2.84453	-3.00331	1.01658	0.424276	1.226	0.604734	0.713119	0.156868	-2.11122	-1.50657	0.156422	-0.255355	0.653792	0.11821	1.72569	0.45398	0.832967	0.415728	1.11422	0.521354
112616	CMTM7	CKLF-like MARVEL transmembrane domain containing 7	2.45409	1.2211	1.35441	0.525583	0.636393	0.553573	0.692172	0.634383	1.14619	0.345102	-2.43235	-2.6264	0.79419	0.119646	1.34148	0.716456	0.413559	-0.0351794	-1.59545	-1.15747	0.0247189	-0.338282	1.57642	0.946541	1.54512	0.26607	1.23964	0.6584	1.2564	0.61021
1259	CNGA1	cyclic nucleotide gated channel alpha 1	1.73393	0.704436	1.32803	0.50719	-2.48009	-1.28455	-0.932801	-0.803249	1.43137	0.563566	0.837076	0.363282	0	-0.968223	1.226	0.604734	0.941003	0.302965	1.11878	0.679628	-1.82678	-1.50408	-1.04343	-1.40556	1.09766	-0.199571	-3.66725	-2.26968	0.52412	0.152581
1260	CNGA2	cyclic nucleotide gated channel alpha 2	0.0220569	-0.523704	-3.39391	-2.78447	-3.97904	-2.16864	1.52585	1.37194	-0.578521	-0.976106	1.83823	1.27877	0	-0.968223	0.888969	0.278662	1.29831	0.532037	-2.72445	-1.92162	1.23192	0.421833	1.52325	0.89881	0.514573	-0.806356	-2.00868	-1.27996	-3.79413	-2.54604
1261	CNGA3	cyclic nucleotide gated channel alpha 3	0.3539	-0.285631	0.380135	-0.153585	0	0.178225	0.259667	0.251741	0	-0.532931	0	-0.40217	0.531156	-0.240654	1.39593	0.769133	-1.21649	-1.0802	2.04253	1.30486	0.29956	-0.165228	1.71794	1.0736	0.96016	-0.342662	-1.41369	-0.924914	-1.8776	-1.34833
1262	CNGA4	cyclic nucleotide gated channel alpha 4	0	-0.539528	0	-0.418577	-1.74999	-0.853932	0.794069	0.724532	0	-0.532931	1.28901	0.77655	0	-0.968223	-1.10047	-1.64607	-3.23538	-2.37451	-2.28227	-1.62234	0.347651	-0.134948	-2.35096	-2.57945	1.22319	-0.0689394	-3.10769	-1.93577	-1.32346	-1.00203
54714	CNGB3	cyclic nucleotide gated channel beta 3	2.53912	1.28209	-1.14146	-1.21429	-2.5989	-1.35462	1.32521	1.19444	2.21314	1.16244	0	-0.40217	0.531156	-0.240654	1.49902	0.868873	-0.399356	-0.556338	-0.657428	-0.522579	3.15819	1.63471	1.87374	1.21348	2.22319	0.971696	-5.1294	-3.14218	-1.70917	-1.24308
254263	CNIH2	cornichon family AMPA receptor auxiliary protein 2	1.81513	0.762688	1.72099	0.781126	0.278784	0.342653	0.932801	0.84727	1.92534	0.941973	1.04801	0.556163	0.503704	-0.278257	1.34148	0.716456	1.65506	0.760748	1.21536	0.744995	2.18083	1.01931	0.61652	0.0847472	1.54512	0.26607	1.05323	0.547166	1.26567	0.616
149111	CNIH3	cornichon family AMPA receptor auxiliary protein 3	1.4587	0.506976	3.06133	1.71547	1.36638	0.984127	1.07692	0.974775	1.12403	0.328131	0.0489986	-0.357364	0.748143	0.0565714	0.448396	-0.147581	2.25002	1.14217	1.79507	1.13737	2.44543	1.18591	-0.286304	-0.725807	1.96016	0.697973	0.00697044	-0.0771663	2.04828	1.10508
54805	CNNM2	cyclin M2	-1.52135	-1.63098	0.782899	0.127181	0.278784	0.342653	-3.68651	-3.23949	1.54474	0.65041	0.758499	0.291428	0.79419	0.119646	-0.906891	-1.45879	0.796126	0.210084	-0.653361	-0.519827	-0.978081	-0.969693	-2.29233	-2.52681	0.96016	-0.342662	0	-0.0813257	-0.539398	-0.512048
26505	CNNM3	cyclin M3	2.21392	1.04879	0.270416	-0.23007	1.05639	0.801291	-0.77267	-0.661579	1.9913	0.992504	1.47805	0.949409	1.01658	0.424276	0.888969	0.278662	1.94503	0.946648	1.16928	0.713813	0.537889	-0.0151648	1.41677	0.803214	1.80816	0.539793	-1.32716	-0.873278	2.29556	1.25961
26504	CNNM4	cyclin M4	-0.344071	-0.786373	-1.32279	-1.34069	-2.10224	-1.06169	-0.531545	-0.448253	1.8793	0.906705	1.8365	1.27719	0.79419	0.119646	1.39593	0.769133	-1.56852	-1.30589	0.584322	0.317887	0.669177	0.0675003	0.465944	-0.05044	1.72569	0.45398	-1.56283	-1.01391	1.63956	0.84966
1268	CNR1	cannabinoid receptor 1 (brain)	0	-0.539528	0.820536	0.153418	-1.89667	-0.940443	-0.206451	-0.160639	0.766065	0.0539116	0.910502	0.430425	0	-0.968223	0.226004	-0.36274	-1.99073	-1.57657	1.23097	0.755566	1.94855	0.873053	-1.09082	-1.4481	1.09766	-0.199571	-3.45369	-2.14224	1.63242	0.845196
1269	CNR2	cannabinoid receptor 2 (macrophage)	-2.32193	-2.20533	0	-0.418577	0.719356	0.602505	1.20587	1.08885	0.265947	-0.329203	0	-0.40217	0.209228	-0.681626	0	-0.581393	0.599697	0.084154	-2.40583	-1.70597	1.09494	0.335583	-1.74362	-2.03418	0.223194	-1.10957	0	-0.0813257	-1.08712	-0.854341
163882	CNST	consortin, connexin sorting protein	2.25683	1.07958	3.73575	2.18561	1.62892	1.13897	0.43519	0.407028	-0.143844	-0.643122	0.000840487	-0.401402	1.64373	1.28332	1.49902	0.868873	1.33133	0.553206	1.24564	0.765491	1.96078	0.880754	1.30254	0.700654	2.03055	0.771223	0.361529	0.134409	-0.28511	-0.353135
8506	CNTNAP1	contactin associated protein 1	-1.38967	-1.53651	1.18692	0.408821	-2.19085	-1.11395	-0.561774	-0.474997	-0.940059	-1.25306	1.44693	0.920956	0	-0.968223	1.1646	0.545331	-1.29446	-1.13019	-3.43948	-2.40559	-2.76562	-2.09521	-1.48171	-1.79904	1.22319	-0.0689394	-1.02515	-0.69306	-1.85037	-1.33132
79937	CNTNAP3	contactin associated protein-like 3	1.63168	0.631079	1.70202	0.767902	-1.15654	-0.503913	0.402661	0.378249	1.04842	0.270211	0.758499	0.291428	0.209228	-0.681626	-0.822906	-1.37753	1.09459	0.401429	0.440629	0.220629	0.682353	0.0757964	1.62182	0.987306	2.28209	1.03298	-3.75951	-2.32473	-1.55545	-1.14701
728577	CNTNAP3B	contactin associated protein-like 3B	0	-0.539528	0	-0.418577	0	0.178225	0	0.0220105	-0.423305	-0.857203	0	-0.40217	0	-0.968223	0	-0.581393	0	-0.300311	0.347923	0.157882	0	-0.353846	0	-0.468763	1.09766	-0.199571	0	-0.0813257	0	-0.17496
85445	CNTNAP4	contactin associated protein-like 4	1.97143	0.874823	0.547044	-0.0372334	-3.41646	-1.83682	1.2581	1.13506	-2.74665	-2.637	0	-0.40217	0.79419	0.119646	1.03336	0.418355	-3.88443	-2.79061	-1.15992	-0.862683	0.0892605	-0.297643	-2.01792	-2.28045	0.445587	-0.878145	-3.32193	-2.06361	-3.17705	-2.16041
129684	CNTNAP5	contactin associated protein-like 5	-2.78311	-2.5362	0.431532	-0.117757	-2.95298	-1.56346	1.0357	0.93831	1.37652	0.521553	-2.32193	-2.52542	0	-0.968223	-1.43296	-1.96774	-3.91378	-2.80943	-1.90433	-1.36653	-0.359189	-0.580009	-2.28875	-2.5236	1.63823	0.362963	-4.94708	-3.03338	-4.22279	-2.81393
1308	COL17A1	collagen, type XVII, alpha 1	1.23017	0.343022	-2.35484	-2.06013	-4.38689	-2.40919	-2.43325	-2.13072	-1.41462	-1.6166	0.0480054	-0.358272	0	-0.968223	0.810966	0.203196	1.10183	0.406071	-3.26603	-2.28819	1.06265	0.315252	-1.57267	-1.8807	0	-1.34184	-0.824649	-0.573416	-3.83067	-2.56887
84570	COL25A1	collagen, type XXV, alpha 1	-2.39097	-2.25487	0	-0.418577	-2.76408	-1.45205	0.648275	0.595547	0	-0.532931	1.28943	0.776934	0	-0.968223	1.10047	0.483287	-2.85673	-2.13175	-2.11872	-1.51164	0.804646	0.152798	0.526399	0.00383619	1.22319	-0.0689394	0.832967	0.415728	1.9157	1.02223
81035	COLEC12	collectin sub-family member 12	1.7415	0.709869	-1.72505	-1.62111	-2.19417	-1.11591	0.472087	0.439671	2.16763	1.12758	0.395929	-0.0401189	0.77135	0.0883605	1.226	0.604734	-1.83893	-1.47925	-0.883861	-0.675839	1.48921	0.583832	1.03921	0.464238	1.80816	0.539793	-1.96589	-1.25443	-0.615605	-0.559673
1312	COMT	catechol-O-methyltransferase	-0.350377	-0.790897	0.887776	0.20029	0.278784	0.342653	-2.15891	-1.888	2.5038	1.3851	1.11214	0.614807	1.79419	1.48943	1.1646	0.545331	1.0006	0.341174	0.444996	0.223585	-1.39259	-1.23069	1.04009	0.465029	1.72569	0.45398	0.0224508	-0.0679287	1.07851	0.49904
10699	CORIN	corin, serine peptidase	-3.19996	-2.83526	-1.20372	-1.25769	-1.95903	-0.977224	0.53943	0.49925	1.3792	0.523602	1.28943	0.776934	1.37915	0.920918	0.888969	0.278662	-2.69657	-2.02908	0.720151	0.409821	1.77534	0.763994	0.523883	0.00157769	0.96016	-0.342662	-2.32193	-1.46688	-1.85037	-1.33132
1362	CPD	carboxypeptidase D	-2.0651	-2.02108	-2.35029	-2.05696	0.764357	0.629047	0.932801	0.84727	1.14304	0.342694	0.676679	0.21661	1.37915	0.920918	0.888969	0.278662	2.02366	0.997053	0.768218	0.442355	-1.43978	-1.2604	1.17768	0.588551	1.09766	-0.199571	-3.08229	-1.92061	-2.47054	-1.71889
1378	CR1	complement component (3b/4b) receptor 1 (Knops blood group)	0.807932	0.0401017	2.90892	1.60923	-1.91572	-0.951681	0.977019	0.88639	-1.2594	-1.49769	-3.80333	-3.88007	1.65625	1.30048	-3.91623	-4.37025	-2.00858	-1.58801	-1.44718	-1.05711	2.08833	0.961067	-1.96128	-2.2296	1.44559	0.16249	-3.44996	-2.14001	-2.9921	-2.04482
1380	CR2	complement component (3d/Epstein Barr virus) receptor 2	-3.35686	-2.94782	2.93548	1.62774	-1.57626	-0.751465	-3.50675	-3.08045	-1.65693	-1.80222	0	-0.40217	0.174831	-0.728742	-2.32193	-2.8278	-0.276564	-0.477616	-0.60782	-0.489003	-0.14853	-0.447367	-2.37941	-2.605	0	-1.34184	-3.51225	-2.17718	-2.26022	-1.58745
23418	CRB1	crumbs family member 1, photoreceptor morphogenesis associated	-1.81775	-1.84362	3.10159	1.74353	-3.06916	-1.63199	-0.932886	-0.803324	0.464189	-0.17734	-2.34879	-2.54999	1.5175	1.11042	1.03336	0.418355	-2.69378	-2.02729	-1.73341	-1.25085	2.7546	1.38059	1.24184	0.646158	0.96016	-0.342662	-3.34948	-2.08005	-1.78606	-1.29113
286204	CRB2	crumbs family member 2	0	-0.539528	1.21663	0.429533	0.994991	0.765076	1.09876	0.994095	0.973715	0.212981	0.758499	0.291428	1.20923	0.688158	1.4484	0.819893	-2.12112	-1.66016	-0.102761	-0.147159	-1.1679	-1.08922	1.23801	0.642718	1.63823	0.362963	-3.0247	-1.88624	1.82731	0.966991
92359	CRB3	crumbs family member 3	0.733932	-0.0129881	1.02403	0.295276	0.99111	0.762787	0	0.0220105	1.14619	0.345102	0	-0.40217	0.79419	0.119646	1.39593	0.769133	0.0350469	-0.277843	-0.583329	-0.472426	-1.11101	-1.05339	1.11136	0.529014	1.63823	0.362963	1.93671	1.07436	1.01288	0.458024
78987	CRELD1	cysteine-rich with EGF-like domains 1	0.721155	-0.0221542	1.70149	0.767529	0.793357	0.646151	-0.175436	-0.1332	0.848981	0.117429	-3.4543	-3.5609	1.20923	0.688158	1.39593	0.769133	1.16566	0.446991	-2.40452	-1.70508	0.728719	0.104991	0.406957	-0.103399	1.44559	0.16249	-1.27039	-0.839401	1.71627	0.897595
1394	CRHR1	corticotropin releasing hormone receptor 1	0.556393	-0.140358	1.54932	0.661449	0	0.178225	1.11371	1.00732	0.381869	-0.240401	0.676679	0.21661	1.37915	0.920918	1.1646	0.545331	1.09821	0.403753	0.904757	0.53477	0.232213	-0.207633	-0.751356	-1.14333	0.223194	-1.10957	-2.32193	-1.46688	0.779343	0.312078
1395	CRHR2	corticotropin releasing hormone receptor 2	-0.597537	-0.968216	1.61651	0.708288	2.08067	1.40542	1.29929	1.17151	-2.49629	-2.44521	-1.51229	-1.78507	0	-0.968223	1.34148	0.716456	0.988936	0.333694	1.50907	0.94379	1.7172	0.727388	1.29887	0.697355	2.03055	0.771223	-1.84072	-1.17973	-1.75648	-1.27264
51232	CRIM1	cysteine rich transmembrane BMP regulator 1 (chordin-like)	2.49499	1.25044	0.525373	-0.0523401	-1.64281	-0.790713	-1.99722	-1.74496	1.26595	0.436845	0.588574	0.136043	1.37915	0.920918	1.03336	0.418355	-2.03333	-1.60388	-0.177564	-0.197788	1.1155	0.348526	0.965118	0.397718	1.63823	0.362963	-1.15497	-0.770526	-1.40476	-1.05284
10321	CRISP3	cysteine-rich secretory protein 3	-2.21551	-2.12899	0.821663	0.154203	0	0.178225	0	0.0220105	0.912696	0.166238	-2.34879	-2.54999	1.37915	0.920918	0.341481	-0.251019	0	-0.300311	0.961072	0.572886	1.19681	0.399723	0.717944	0.175805	0.638232	-0.677672	-3.24997	-2.02067	-2.27099	-1.59418
64109	CRLF2	cytokine receptor-like factor 2	-3.32193	-2.92276	0	-0.418577	0.770897	0.632905	0	0.0220105	NA	NA	NA	NA	NA	NA	1.68544	1.04922	-2.32193	-1.7889	NA	NA	NA	NA	NA	NA	NA	NA	-3.93293	-2.42821	NA	NA
56253	CRTAM	cytotoxic and regulatory T cell molecule	0.467857	-0.203877	0.328623	-0.189494	-2.21021	-1.12537	1.377	1.24026	1.32507	0.482138	1.23287	0.725208	1.48978	1.07245	1.226	0.604734	-1.16845	-1.0494	0.583329	0.317214	-0.99363	-0.979484	0.804435	0.253457	0.736966	-0.574926	-0.0983407	-0.140008	1.33368	0.658502
1435	CSF1	colony stimulating factor 1 (macrophage)	1.4402	0.493706	0.782466	0.126879	0	0.178225	1.45074	1.3055	0.934682	0.18308	1.04801	0.556163	0	-0.968223	0	-0.581393	1.71312	0.797967	-0.65159	-0.518628	1.69195	0.711489	0.966971	0.399381	1.44559	0.16249	-1.04502	-0.704915	1.53182	0.782327
1436	CSF1R	colony stimulating factor 1 receptor	1.30363	0.395725	0.743066	0.0994132	-1.67021	-0.806877	0.865779	0.787975	0.387194	-0.236322	0.720536	0.256714	-3.50825	-5.77377	1.54793	0.916192	-2.9148	-2.16898	-0.0805011	-0.132092	-1.80148	-1.48814	1.17607	0.587114	1.72569	0.45398	-1.47237	-0.95993	1.30239	0.638947
1438	CSF2RA	colony stimulating factor 2 receptor, alpha, low-affinity (granulocyte-macrophage)	-2.32193	-2.20533	0.429317	-0.119301	1.15462	0.859229	0	0.0220105	NA	NA	NA	NA	NA	NA	-1.13046	-1.67508	-3.90689	-2.80501	-2.32193	-1.64918	-2.32193	-1.81584	NA	NA	NA	NA	-1.38908	-0.910226	-4.32193	-2.87588
1439	CSF2RB	colony stimulating factor 2 receptor, beta, low-affinity (granulocyte-macrophage)	1.42146	0.480264	-3.3163	-2.73037	0.636393	0.553573	0.847997	0.772243	-1.50032	-1.68225	1.11214	0.614807	1.66866	1.31748	1.226	0.604734	-1.18161	-1.05784	-1.30573	-0.961378	-0.612274	-0.739363	0.0392113	-0.43356	0.445587	-0.878145	-2.30267	-1.45539	1.2564	0.61021
1441	CSF3R	colony stimulating factor 3 receptor (granulocyte)	0.793433	0.0296994	1.7225	0.782177	0.788893	0.643519	1.27737	1.15212	0.67374	-0.0168136	0	-0.40217	-0.41226	-1.53293	-1.92871	-2.44737	1.34482	0.561853	0.483882	0.249905	2.59726	1.28152	0.966971	0.399381	0.96016	-0.342662	0.519358	0.228589	-0.520034	-0.499947
64478	CSMD1	CUB and Sushi multiple domains 1	-2.15989	-2.08908	-3.76603	-3.04387	-5.86324	-3.27995	-1.62966	-1.41977	-5.06102	-4.40992	-2.89576	-3.05015	1.37915	0.920918	-1.2461	-1.78697	-4.48115	-3.17317	-2.21546	-1.57712	-0.814103	-0.866445	-3.26703	-3.40189	0.0995357	-1.23826	-5.07345	-3.10879	-3.95231	-2.64489
114784	CSMD2	CUB and Sushi multiple domains 2	-1.227	-1.41981	-1.58033	-1.52022	-3.259	-1.74395	1.27737	1.15212	1.53517	0.643085	0.0480054	-0.358272	0.531156	-0.240654	0.641041	0.0387982	-3.97824	-2.85076	-4.51707	-3.13494	1.63608	0.67631	0	-0.468763	1.72569	0.45398	-5.88019	-3.59019	-1.95962	-1.39959
114788	CSMD3	CUB and Sushi multiple domains 3	-1.93785	-1.92979	1.10265	0.350076	-4.49025	-2.47015	-1.44899	-1.25993	-3.40048	-3.13786	-3.86393	-3.93548	0.77135	0.0883605	0.0461485	-0.536745	-5.24452	-3.66256	-4.0396	-2.81177	1.16483	0.379586	-1.79012	-2.07593	2.09766	0.841064	-5.05004	-3.09482	-4.1246	-2.75257
1464	CSPG4	chondroitin sulfate proteoglycan 4	0	-0.539528	1.70195	0.767849	-1.78783	-0.876246	-2.7401	-2.40219	-1.88029	-1.97332	1.11214	0.614807	0.209228	-0.681626	0.888969	0.278662	0	-0.300311	1.64232	1.03398	0.940464	0.238316	0.719044	0.176793	2.03055	0.771223	1.68467	0.923961	1.73982	0.912313
10675	CSPG5	chondroitin sulfate proteoglycan 5 (neuroglycan C)	-2.19535	-2.11452	0.821381	0.154007	0.465847	0.452984	-1.0357	-0.894289	0.686754	-0.00684445	-1.80552	-2.0532	0	-0.968223	1.2849	0.661713	0.520474	0.0333638	0	-0.077606	1.51656	0.601056	0.888969	0.329351	1.54512	0.26607	1.66605	0.912855	1.0882	0.505097
203413	CT83	cancer/testis antigen 83	0.141356	-0.438116	0.894593	0.205043	0	0.178225	0	0.0220105	0.656204	-0.0302473	0.178083	-0.239325	0	-0.968223	0.641041	0.0387982	1.82938	0.8725	0	-0.077606	0	-0.353846	0	-0.468763	0.415037	-0.909936	0.832967	0.415728	0.164884	-0.0719178
64693	CTAGE1	cutaneous T-cell lymphoma-associated antigen 1	-0.57289	-0.950533	0.930765	0.230258	-1.67155	-0.807665	-0.0586853	-0.0299091	1.87172	0.9009	-2.03019	-2.25865	0.79419	0.119646	-2.3771	-2.88118	-0.100936	-0.365021	1.55342	0.973814	1.2999	0.464632	1.17687	0.587833	1.72569	0.45398	-2.34215	-1.47895	-3.09574	-2.1096
441294	CTAGE15	CTAGE family, member 15	1.03444	0.202604	1.03195	0.300794	1.2724	0.928695	0.0495284	0.0658288	1.07248	0.288637	1.83794	1.27851	0.990798	0.388955	1.81097	1.17067	2.08366	1.03552	0	-0.077606	2.59689	1.28128	1.23954	0.644095	0.638232	-0.677672	2.27304	1.27506	0.855283	0.359536
100128553	CTAGE4	CTAGE family, member 4	1.12986	0.271061	1.38013	0.543513	1.37534	0.989412	0.940241	0.853852	1.26595	0.436845	2.11332	1.53033	0.820873	0.156195	1.81097	1.17067	1.72974	0.808625	1.70961	1.07953	2.61365	1.29183	1.4161	0.802605	0.445587	-0.878145	2.12742	1.18817	1.55099	0.794309
4253	CTAGE5	CTAGE family, member 5	-1.4794	-1.60089	-1.20797	-1.26065	-2.8226	-1.48656	-0.661166	-0.562931	-0.466229	-0.890085	0	-0.40217	0.209228	-0.681626	-3.32193	-3.79527	-0.471779	-0.602768	-1.40334	-1.02744	-0.943284	-0.947784	-1.48754	-1.80428	2.54512	1.30671	0	-0.0813257	-1.58028	-1.16253
340307	CTAGE6	CTAGE family, member 6	1.38324	0.452845	1.43079	0.578827	1.63639	1.14338	1.67759	1.5062	0.766065	0.0539116	2.29006	1.69195	1.1428	0.597167	2.06731	1.41867	-0.441425	-0.583308	1.83092	1.16163	2.99383	1.53121	1.47132	0.852187	0.96016	-0.342662	2.5552	1.44343	1.65737	0.860786
100142659	CTAGE8	CTAGE family, member 8	0	-0.539528	NA	NA	NA	NA	NA	NA	0	-0.532931	0	-0.40217	-0.388355	-1.50019	NA	NA	0.22039	-0.159019	0	-0.077606	2.5539	1.25421	0	-0.468763	0	-1.34184	NA	NA	0	-0.17496
643854	CTAGE9	CTAGE family, member 9	1.5128	0.545794	1.03122	0.300286	0.922734	0.722459	0	0.0220105	0.923731	0.174691	0.758499	0.291428	1.20923	0.688158	0.888969	0.278662	1.40773	0.602182	0	-0.077606	0	-0.353846	1.11052	0.528262	1.72569	0.45398	0.851619	0.426858	1.0882	0.505097
1493	CTLA4	cytotoxic T-lymphocyte-associated protein 4	0.733932	-0.0129881	1.0966	0.345861	-1.30334	-0.590495	-0.656344	-0.558664	-1.35806	-1.57327	1.44844	0.922333	1.53116	1.12913	0	-0.581393	1.15177	0.438089	0.77705	0.448333	1.54746	0.620509	0	-0.468763	1.80816	0.539793	0.0622371	-0.0441871	0.956476	0.422775
1497	CTNS	cystinosin, lysosomal cystine transporter	0.655352	-0.069363	-1.31276	-1.3337	-2.06619	-1.04043	-0.51884	-0.437013	1.14619	0.345102	1	0.512266	0.61936	-0.119834	0.641041	0.0387982	0	-0.300311	-1.75891	-1.26811	-1.45773	-1.27171	-0.40975	-0.836636	1.63823	0.362963	0.93957	0.479341	1.8115	0.957109
404217	CTXN1	cortexin 1	1.4587	0.506976	1.50342	0.629455	1.16844	0.867375	0.996847	0.903932	0	-0.532931	1.44655	0.920611	1.78282	1.47385	1.81097	1.17067	0.883044	0.265807	1.98937	1.26888	1.16427	0.379234	1.11136	0.529014	2.54512	1.30671	1.54638	0.841442	1.14719	0.541961
399697	CTXN2	cortexin 2	0	-0.539528	0.431163	-0.118014	0	0.178225	0	0.0220105	0	-0.532931	0	-0.40217	1.01658	0.424276	1.03336	0.418355	0	-0.300311	0	-0.077606	0	-0.353846	0.966045	0.39855	1.96016	0.697973	0.717853	0.347037	1.16488	0.553016
613212	CTXN3	cortexin 3	-1.83335	-1.85482	1.18521	0.407633	0	0.178225	1.45074	1.3055	0.494109	-0.15442	3.00732	2.34783	-0.388355	-1.50019	0.962969	0.350255	1.61749	0.736657	1.33827	0.828189	0.00600357	-0.350066	0.625934	0.0931991	0.96016	-0.342662	0	-0.0813257	0.52412	0.152581
51596	CUTA	cutA divalent cation tolerance homolog (E. coli)	1.8007	0.752337	1.94813	0.939462	0.548366	0.501654	-0.0182756	0.00584187	1.3223	0.48001	0.910502	0.430425	1.37915	0.920918	0.888969	0.278662	-0.47375	-0.604032	0	-0.077606	1.40462	0.530571	1.47393	0.854529	1.54512	0.26607	2.74191	1.55485	1.99055	1.069
50624	CUZD1	CUB and zona pellucida-like domains 1	1.1745	0.303085	-1.02919	-1.13603	-2.99822	-1.59014	0	0.0220105	1.07578	0.291166	0	-0.40217	0.531156	-0.240654	0.485427	-0.111755	-3.34967	-2.44778	-1.20255	-0.891539	-0.165751	-0.458211	0.526399	0.00383619	0	-1.34184	0	-0.0813257	1.17475	0.559184
80157	CWH43	cell wall biogenesis 43 C-terminal homolog (S. cerevisiae)	1.85058	0.78812	0.215451	-0.268387	0.164995	0.27554	0.641354	0.589423	1.52796	0.63756	0	-0.40217	0	-0.968223	0.341481	-0.251019	-0.870829	-0.858598	-1.40871	-1.03108	0	-0.353846	1.03833	0.463447	1.33867	0.0512303	-2.67356	-1.67671	-2.44583	-1.70344
6376	CX3CL1	chemokine (C-X3-C motif) ligand 1	0.733932	-0.0129881	0	-0.418577	0.272402	0.338889	-0.636307	-0.540937	1.43394	0.565539	0.395929	-0.0401189	1.53116	1.12913	0.728504	0.123416	1.60735	0.730158	-1.03411	-0.777534	-0.220519	-0.492695	0.110811	-0.369277	0.445587	-0.878145	0.799203	0.39558	0.956476	0.422775
1524	CX3CR1	chemokine (C-X3-C motif) receptor 1	1.62351	0.625215	0	-0.418577	-3.32193	-1.78107	0	0.0220105	0	-0.532931	-1.09181	-1.40056	1.37915	0.920918	0	-0.581393	-2.05159	-1.61558	0.37707	0.17761	1.68977	0.710114	1.47393	0.854529	0.223194	-1.10957	0	-0.0813257	1.55099	0.794309
1525	CXADR	coxsackie virus and adenovirus receptor	-0.148124	-0.645795	0.35903	-0.168297	-1.63462	-0.785882	0.140677	0.146469	1.12722	0.330572	0.980891	0.494792	0.977204	0.370336	1.39593	0.769133	1.69887	0.78883	-1.38621	-1.01585	-1.25814	-1.14603	1.47197	0.852773	1.88616	0.620966	1.95981	1.08815	-1.6587	-1.21154
58191	CXCL16	chemokine (C-X-C motif) ligand 16	0.777608	0.0183462	0.726935	0.0881687	-0.437607	-0.0798788	-0.29874	-0.242288	-1.30039	-1.5291	1.28901	0.77655	0.209228	-0.681626	1.39593	0.769133	0	-0.300311	-0.763754	-0.594545	-1.46639	-1.27716	0.0138904	-0.456293	1.54512	0.26607	0	-0.0813257	1.98495	1.06551
3577	CXCR1	chemokine (C-X-C motif) receptor 1	0	-0.539528	0.930504	0.230076	1.17187	0.8694	1.49577	1.34533	0.686754	-0.00684445	0	-0.40217	1.01658	0.424276	0.810966	0.203196	1.16566	0.446991	0.583329	0.317214	1.69195	0.711489	1.30181	0.699995	1.33867	0.0512303	-1.82346	-1.16943	1.26567	0.616
3579	CXCR2	chemokine (C-X-C motif) receptor 2	0	-0.539528	0.430609	-0.1184	1.22632	0.901514	0.844051	0.768752	0.593645	-0.0781707	0	-0.40217	1.37915	0.920918	0.962969	0.350255	-2.44731	-1.86928	-0.457571	-0.387308	1.51656	0.601056	1.24031	0.644783	1.22319	-0.0689394	1.22699	0.650855	1.55855	0.799033
2833	CXCR3	chemokine (C-X-C motif) receptor 3	1.30363	0.395725	0	-0.418577	0.171868	0.279594	0.293497	0.28167	0.92739	0.177494	1.23243	0.724808	1.65625	1.30048	1.4484	0.819893	0.870382	0.25769	-0.167459	-0.190949	-2.18373	-1.72883	0.625934	0.0931991	1.72569	0.45398	0.289127	0.0912045	0.614305	0.20894
7852	CXCR4	chemokine (C-X-C motif) receptor 4	0.141356	-0.438116	0.78261	0.12698	-1.43873	-0.670349	-0.144522	-0.105849	1.07907	0.29369	1.34346	0.826339	1.66866	1.31748	1.49902	0.868873	0.504174	0.0229142	-1.37707	-1.00966	-0.386052	-0.596923	-0.936494	-1.30955	1.44559	0.16249	0	-0.0813257	1.2564	0.61021
643	CXCR5	chemokine (C-X-C motif) receptor 5	0	-0.539528	0.0965994	-0.351237	-1.60831	-0.770367	1.03917	0.941378	0.00175619	-0.531586	0.496193	0.0515662	1.48978	1.07245	0.547932	-0.0512828	0.941003	0.302965	0.292935	0.120664	1.83849	0.803757	0.622411	0.0900361	-0.638232	-2.00601	-0.298081	-0.259199	0.867505	0.367174
10663	CXCR6	chemokine (C-X-C motif) receptor 6	1.1753	0.303662	0.618129	0.0123202	0.859495	0.68516	1.2581	1.13506	0.146186	-0.420946	-0.532647	-0.889242	1.37915	0.920918	0.100473	-0.484188	1.29808	0.531887	0	-0.077606	1.13079	0.358152	0.302539	-0.197144	1.44559	0.16249	1.29678	0.692498	1.35565	0.672235
1534	CYB561	cytochrome b561	2.92895	1.56177	3.41697	1.96339	1.45743	1.03783	-0.227328	-0.179109	1.48669	0.605943	1.1749	0.672202	1.53116	1.12913	1.77032	1.13135	2.27425	1.15771	1.44423	0.899909	1.29152	0.459356	1.03568	0.461072	1.80816	0.539793	2.38836	1.34388	1.29776	0.636053
284613	CYB561D1	cytochrome b561 family, member D1	1.71097	0.687963	0.858452	0.179848	0.93086	0.727252	0.77267	0.7056	0.856679	0.123326	0.395929	-0.0401189	0.584963	-0.166951	-2.86942	-3.35748	0.800582	0.212941	0.785071	0.453761	1.04731	0.305593	0.888969	0.329351	1.44559	0.16249	2.09739	1.17024	2.00453	1.07774
11068	CYB561D2	cytochrome b561 family, member D2	0.603341	-0.106677	-1.18593	-1.24528	0.22717	0.312211	-1.30944	-1.13647	0	-0.532931	-2.57536	-2.75718	0.209228	-0.681626	0.736966	0.131603	0.298081	-0.109212	-2.02518	-1.44833	-0.794667	-0.854207	1.04097	0.465819	1.54512	0.26607	-2.75323	-1.72425	1.85528	0.98447
124936	CYB5D2	cytochrome b5 domain containing 2	0.989804	0.170581	-2.88714	-2.4312	-0.838049	-0.316062	-1.7731	-1.54667	1.32784	0.484261	1.29956	0.786194	-1.59728	-3.15615	1.34148	0.716456	0.298081	-0.109212	-0.846155	-0.650318	-1.7511	-1.45642	0.0832903	-0.393986	0.96016	-0.342662	1.27691	0.680643	-0.500372	-0.487659
1535	CYBA	cytochrome b-245, alpha polypeptide	0.878321	0.0906007	-0.919187	-1.05934	-0.0339317	0.158211	0.774634	0.707338	0.920062	0.17188	1.39632	0.874674	0.209228	-0.681626	1.226	0.604734	0.387056	-0.0521704	-2.21576	-1.57732	-1.73433	-1.44586	-0.915984	-1.29113	1.63823	0.362963	0.37485	0.142358	0.408782	0.0805021
1536	CYBB	cytochrome b-245, beta polypeptide	1.10659	0.254366	-1.54675	-1.49682	-2.36679	-1.21772	-2.80645	-2.46089	-1.87504	-1.9693	0.496193	0.0515662	1.36397	0.900116	1.49902	0.868873	-1.28369	-1.12328	-3.0436	-2.13764	-1.44553	-1.26402	1.35797	0.750415	2.39312	1.14853	-3.68033	-2.27748	-1.28456	-0.977725
79901	CYBRD1	cytochrome b reductase 1	0.718665	-0.0239408	0.479556	-0.0842792	1.51582	1.07227	-1.07692	-0.930753	1.52313	0.63386	1.63429	1.09229	1.01658	0.424276	0.888969	0.278662	1.396	0.594661	-0.441417	-0.376375	0.935569	0.235233	0.695774	0.155901	0.445587	-0.878145	0.799203	0.39558	1.95074	1.04413
57404	CYP20A1	cytochrome P450, family 20, subfamily A, polypeptide 1	0.836501	0.0605979	-0.158998	-0.529414	1.27878	0.932459	0.450742	0.420787	1.92006	0.937928	0.913232	0.432921	0.531156	-0.240654	-0.0824622	-0.661173	1.87038	0.898789	0.534165	0.283938	1.76438	0.757093	1.04097	0.465819	0.115477	-1.22167	1.06224	0.55254	0.842256	0.351395
100861540	CYP3A7-CYP3AP1	CYP3A7-CYP3AP1 readthrough	-3.32193	-2.92276	0	-0.418577	-3.90689	-2.12608	0	0.0220105	NA	NA	-2.32193	-2.52542	NA	NA	0.226004	-0.36274	-2.32193	-1.7889	NA	NA	NA	NA	NA	NA	NA	NA	-4.32193	-2.66034	NA	NA
1579	CYP4A11	cytochrome P450, family 4, subfamily A, polypeptide 11	1.5304	0.558416	0.479199	-0.084528	0.372364	0.397847	-0.0317139	-0.00604714	-1.7329	-1.86041	-1.48543	-1.7605	1.66866	1.31748	1.68544	1.04922	0	-0.300311	0	-0.077606	2.30408	1.09691	0.526399	0.00383619	0.96016	-0.342662	-2.06976	-1.31641	1.20891	0.580527
66002	CYP4F12	cytochrome P450, family 4, subfamily F, polypeptide 12	-1.00811	-1.26277	1.52595	0.645158	-2.44541	-1.26409	1.135	1.02616	1.42879	0.56159	1.11214	0.614807	0	-0.968223	1.68544	1.04922	-2.03016	-1.60185	1.27607	0.786088	3.18843	1.65375	1.17687	0.587833	2.54512	1.30671	-2.89496	-1.80883	-1.0903	-0.856327
10800	CYSLTR1	cysteinyl leukotriene receptor 1	0	-0.539528	0.820818	0.153614	-1.91348	-0.95036	-2.56849	-2.25036	1.07578	0.291166	1.17354	0.670953	0.79419	0.119646	0.641041	0.0387982	-0.709502	-0.755172	-0.497438	-0.414292	1.16789	0.381513	0.526399	0.00383619	1.09766	-0.199571	-1.90195	-1.21627	1.16488	0.553016
57105	CYSLTR2	cysteinyl leukotriene receptor 2	-1.30485	-1.47566	0	-0.418577	-0.892154	-0.347974	-0.437746	-0.365268	1.20731	0.391925	0.836501	0.362756	0.531156	-0.240654	-2.64779	-3.14306	0.620009	0.0971761	0	-0.077606	-0.371969	-0.588056	-2.07422	-2.33099	-0.947533	-2.32787	-1.11406	-0.746113	0.11422	-0.10358
116159	CYYR1	cysteine/tyrosine-rich 1	1.20847	0.327457	1.47982	0.613006	1.17187	0.8694	0.0733629	0.0869155	0.686754	-0.00684445	0.910502	0.430425	1.99703	1.76727	1.226	0.604734	-1.16519	-1.04732	0.131167	0.0111731	1.43718	0.551074	1.47197	0.852773	1.88616	0.620966	0	-0.0813257	1.84296	0.976767
1605	DAG1	dystroglycan 1 (dystrophin-associated glycoprotein 1)	1.39289	0.459768	-0.999443	-1.11529	0.181111	0.285045	0.272722	0.263291	0.146186	-0.420946	-3.11865	-3.25398	0.79419	0.119646	1.03336	0.418355	0.800582	0.212941	-2.56528	-1.81389	-0.586626	-0.723214	0.966045	0.39855	-0.223194	-1.5741	-1.82346	-1.16943	1.71627	0.897595
747	DAGLA	diacylglycerol lipase, alpha	1.4402	0.493706	-2.11868	-1.8955	0.011186	0.184822	-1.38934	-1.20716	-1.12975	-1.39837	0.836501	0.362756	1.78282	1.47385	0.962969	0.350255	1.75062	0.822009	0.37707	0.17761	0.723447	0.101671	0.965118	0.397718	1.22319	-0.0689394	0.0622371	-0.0441871	1.92157	1.0259
221955	DAGLB	diacylglycerol lipase, beta	2.3539	1.14922	1.3425	0.51728	3.19767	2.06423	1.73988	1.5613	0.331097	-0.279295	-0.818222	-1.15038	1.5175	1.11042	1.59524	0.961959	3.55668	1.97987	1.13221	0.688722	-0.956646	-0.956197	1.71739	1.07311	2.99578	1.77568	2.35022	1.32111	-0.771015	-0.656793
1621	DBH	dopamine beta-hydroxylase (dopamine beta-monooxygenase)	-2.39097	-2.25487	1.12787	0.367659	0	0.178225	0.61188	0.563348	0.821711	0.0965394	0.395929	-0.0401189	1.53116	1.12913	-0.850758	-1.40448	-2.46125	-1.87821	1.16829	0.71314	0.685393	0.0777107	0.517575	-0.00408585	0.808157	-0.500842	-2.7096	-1.69822	0.614305	0.20894
285761	DCBLD1	discoidin, CUB and LCCL domain containing 1	0.971431	0.1574	1.72213	0.781914	0.636393	0.553573	-0.932801	-0.803249	-0.813515	-1.15612	0.758499	0.291428	1.53116	1.12913	1.10047	0.483287	-1.9444	-1.54686	0.102761	-0.00805337	-0.389012	-0.598787	-2.39039	-2.61485	2.33867	1.09187	-0.450084	-0.349903	-2.61324	-1.80806
131566	DCBLD2	discoidin, CUB and LCCL domain containing 2	-0.618693	-0.983393	0.929852	0.229621	-2.33866	-1.20113	1.50964	1.3576	2.11443	1.08683	0.677322	0.217197	1.66866	1.31748	0.728504	0.123416	1.56325	0.701889	2.23753	1.43684	1.55467	0.625052	1.03657	0.461864	1.09766	-0.199571	1.00961	0.521135	-1.85843	-1.33636
1630	DCC	DCC netrin 1 receptor	-0.293359	-0.749991	-3.21122	-2.65711	-4.62386	-2.54896	-0.744161	-0.636357	-3.36358	-3.1096	-2.47684	-2.66708	1.01658	0.424276	1.49902	0.868873	-4.00321	-2.86677	-1.17665	-0.874013	-1.98892	-1.60617	0.431639	-0.0812384	0.638232	-0.677672	-6.06541	-3.70072	-3.33257	-2.2576
8642	DCHS1	dachsous cadherin-related 1	-1.29278	-1.467	0.58558	-0.01037	0.863746	0.687667	-1.31231	-1.13901	1.49411	0.611628	1.23243	0.724808	1.37915	0.920918	0.0641303	-0.519348	-4.67191	-3.29546	-3.95645	-2.75549	1.00174	0.276898	1.17848	0.589269	0.808157	-0.500842	1.06224	0.55254	-2.42339	-1.68942
54798	DCHS2	dachsous cadherin-related 2	-4.69253	-3.90606	0.964906	0.254058	-4.87701	-2.69827	1.11371	1.00732	-4.28945	-3.81886	0.837076	0.363282	0	-0.968223	0.5025	-0.0952365	-1.8278	-1.47211	-3.06997	-2.15548	0.380755	-0.114104	1.24261	0.646845	1.33867	0.0512303	-3.06697	-1.91147	-3.87889	-2.59901
149095	DCST1	DC-STAMP domain containing 1	2.72632	1.4164	1.27417	0.469649	0.850955	0.680123	0.977019	0.88639	0.825639	0.0995479	0	-0.40217	1.20923	0.688158	1.4484	0.819893	3.27196	1.79734	0.287247	0.116814	1.88986	0.836099	0.708005	0.166882	2.16179	0.907801	2.45092	1.38121	2.81934	1.58694
127579	DCST2	DC-STAMP domain containing 2	3.19198	1.75048	1.18177	0.405236	1.63391	1.14191	0.977019	0.88639	-0.746827	-1.10504	1.28985	0.777318	1.01658	0.424276	-1.46081	-1.99469	3.6113	2.01489	1.66432	1.04887	2.79378	1.40526	1.7581	1.10965	2.39312	1.14853	0.328771	0.114861	0.504825	0.140523
81501	DCSTAMP	dendrocyte expressed seven transmembrane protein	2.7225	1.41366	3.19822	1.8109	-0.869872	-0.334831	-1.29077	-1.11995	-0.897172	-1.22021	-2.27095	-2.4788	1.01658	0.424276	1.39593	0.769133	-2.55435	-1.9379	1.91397	1.21784	3.82331	2.0535	1.74628	1.09904	1.96016	0.697973	-0.491145	-0.374405	1.57355	0.808406
1638	DCT	dopachrome tautomerase	1.72632	0.698974	1.03086	0.300031	-2.74032	-1.43803	0.701955	0.643038	0	-0.532931	0	-0.40217	0.531156	-0.240654	1.34148	0.716456	-3.24695	-2.38193	-1.36502	-1.0015	1.38997	0.521346	0.752907	0.207195	1.09766	-0.199571	-0.985967	-0.669679	-2.90959	-1.99326
780	DDR1	discoidin domain receptor tyrosine kinase 1	1.486	0.526567	1.21631	0.429309	-1.46423	-0.685389	-1.11371	-0.963298	-0.738318	-1.09852	-1.25298	-1.54794	1.66866	1.31748	0.341037	-0.251448	2.58159	1.35474	-1.34743	-0.9896	1.43204	0.547833	0.502932	-0.0172321	0.808157	-0.500842	2.58835	1.46321	1.81781	0.961053
4921	DDR2	discoidin domain receptor tyrosine kinase 2	3.20025	1.75641	0.395445	-0.142912	-0.623429	-0.189478	-0.77267	-0.661579	-0.652552	-1.03282	0.589939	0.137291	0.209228	-0.681626	1.226	0.604734	0.478775	0.00663071	1.74156	1.10115	1.94255	0.869277	1.17687	0.587833	2.76751	1.53814	-0.0736993	-0.125304	-1.36267	-1.02654
8560	DEGS1	delta(4)-desaturase, sphingolipid 1	1.36375	0.438857	3.51889	2.03444	1.36638	0.984127	-0.865779	-0.743954	1.53037	0.639405	-1.05333	-1.36538	0.997028	0.39749	1.2849	0.661713	2.2186	1.12203	1.88566	1.19868	1.99659	0.903304	0.880198	0.321477	1.33867	0.0512303	3.22298	1.84192	2.44433	1.35259
163486	DENND1B	DENN/MADD domain containing 1B	2.36375	1.15628	0.894213	0.204778	-1.67111	-0.807407	0.0231885	0.0425256	1.67374	0.749234	1.23243	0.724808	0.503704	-0.278257	1.03336	0.418355	1.89382	0.913814	-0.444615	-0.378539	1.85716	0.815513	1.17768	0.588551	2.63823	1.4036	-0.446744	-0.34791	0.588283	0.192678
28955	DEXI	Dexi homolog (mouse)	2.14707	1.00083	3.03965	1.70036	1.62208	1.13494	0.970956	0.881026	1.20128	0.387304	1.11261	0.615241	1.79419	1.48943	1.34148	0.716456	2.31698	1.1851	-0.527736	-0.434799	-1.18852	-1.1022	1.7613	1.11253	1.88616	0.620966	1.49847	0.812852	1.79551	0.947117
9993	DGCR2	DiGeorge syndrome critical region gene 2	1.99062	0.888593	-1.99121	-1.80665	-0.456728	-0.0911563	-2.46634	-2.15998	2.51625	1.39464	1	0.512266	0.584963	-0.166951	1.06413	0.448126	-0.904715	-0.880323	1.09552	0.663883	-0.615089	-0.741136	-1.15647	-1.50704	2.33867	1.09187	0.171018	0.0207254	1.05042	0.481486
8526	DGKE	diacylglycerol kinase, epsilon 64kDa	2.72632	1.4164	0.3381	-0.182888	-2.85787	-1.50737	0.870463	0.792119	-0.641666	-1.02448	0.91214	0.431924	1.37915	0.920918	1.68544	1.04922	1.85975	0.891969	-0.861798	-0.660905	0.356115	-0.129619	1.47067	0.851601	0.808157	-0.500842	-2.13695	-1.35651	1.44433	0.727652
79154	DHRS11	dehydrogenase/reductase (SDR family) member 11	2.26736	1.08713	1.42922	0.577733	1.10455	0.829694	0	0.0220105	1.68243	0.755891	1.34427	0.827079	0.79419	0.119646	1.34148	0.716456	2.17083	1.09141	0	-0.077606	0	-0.353846	0.526399	0.00383619	1.09766	-0.199571	-0.51421	-0.388169	1.53182	0.782327
9249	DHRS3	dehydrogenase/reductase (SDR family) member 3	0.822287	0.0504005	0.965416	0.254413	0.692989	0.586954	-0.450742	-0.376766	1.13989	0.34028	0.676037	0.216022	1.53116	1.12913	0.341481	-0.251019	1.34177	0.559895	-0.573599	-0.465841	0.490639	-0.0449163	1.24184	0.646158	0.96016	-0.342662	1.74471	0.95979	1.706	0.891181
51635	DHRS7	dehydrogenase/reductase (SDR family) member 7	1.16408	0.295608	0.567537	-0.0229475	-0.108604	0.114169	-1.48176	-1.28892	2.06751	1.05088	0.173536	-0.243483	1.66866	1.31748	0.810966	0.203196	0.38417	-0.0540201	-0.744531	-0.581534	-0.711451	-0.80181	1.24107	0.645471	0.96016	-0.342662	0.612327	0.284067	-2.15455	-1.52141
56616	DIABLO	diablo, IAP-binding mitochondrial protein	2.04059	0.924442	1.62143	0.711721	2.08614	1.40864	1.64827	1.48026	1.43908	0.569474	1.23243	0.724808	1.01658	0.424276	1.03336	0.418355	1.56587	0.703569	0	-0.077606	-0.65503	-0.766285	1.88701	1.22539	2.54512	1.30671	1.61233	0.880794	-0.777591	-0.660903
1733	DIO1	deiodinase, iodothyronine, type I	0.749038	-0.00215004	0.214593	-0.268984	0.641354	0.556499	-0.749481	-0.641064	0.139891	-0.425768	0.289854	-0.137117	-1.02385	-2.37067	0.641041	0.0387982	1.45393	0.631802	1.53446	0.960979	2.45703	1.19322	0.155206	-0.32942	1.44559	0.16249	1.49847	0.812852	-0.725969	-0.628643
1735	DIO3	deiodinase, iodothyronine, type III	1.60702	0.613386	0.479734	-0.0841549	-3.92245	-2.13526	-1.2148	-1.05274	0.365776	-0.252729	0.676037	0.216022	0.209228	-0.681626	0	-0.581393	0.694085	0.144666	1.48321	0.926292	1.87867	0.829058	1.24031	0.644783	1.33867	0.0512303	0.908237	0.460644	0.66439	0.24024
84976	DISP1	dispatched homolog 1 (Drosophila)	1.5987	0.60742	0.026934	-0.399801	-0.91978	-0.364268	1.15278	1.04189	-0.898312	-1.22108	0.354112	-0.0783575	1.36397	0.900116	0.962969	0.350255	2.74378	1.45872	2.19202	1.40604	2.43788	1.18116	0.465161	-0.0511428	1.09766	-0.199571	0.202606	0.0395747	-0.428483	-0.442733
85455	DISP2	dispatched homolog 2 (Drosophila)	-2.62293	-2.42128	-1.81338	-1.68268	-2.13352	-1.08014	-2.75288	-2.41349	-0.465249	-0.889334	0.836501	0.362756	1.01658	0.424276	0.341481	-0.251019	0.625179	0.10049	0.37707	0.17761	0.36926	-0.121342	0	-0.468763	1.09766	-0.199571	0.699667	0.336185	0.984954	0.440572
8788	DLK1	delta-like 1 homolog (Drosophila)	0.945436	0.13875	0.526723	-0.0513988	-0.548366	-0.145205	1.01641	0.921237	0.984294	0.221085	0.395929	-0.0401189	0.209228	-0.681626	0	-0.581393	-3.37689	-2.46523	2.07707	1.32824	2.04909	0.936363	0.522624	0.000446962	1.88616	0.620966	0	-0.0813257	0.484777	0.127994
65989	DLK2	delta-like 2 homolog (Drosophila)	1.5304	0.558416	1.7219	0.781757	0.240065	0.319816	0.0426328	0.0597282	1.95791	0.966924	1.83679	1.27746	1.20923	0.688158	1.226	0.604734	2.41802	1.24988	0.191925	0.0522966	2.14098	0.994217	1.24261	0.646845	2.09766	0.841064	2.37335	1.33492	1.23285	0.59549
28514	DLL1	delta-like 1 (Drosophila)	-2.58024	-2.39065	0.693535	0.0648855	0.709942	0.596953	-0.0278225	-0.0026044	1.2043	0.389617	0.836501	0.362756	1.89917	1.63323	0.206451	-0.381657	0.713119	0.156868	0.145292	0.0207332	0.563877	0.00119807	1.17848	0.589269	0.96016	-0.342662	0.223587	0.052095	1.29127	0.631999
10683	DLL3	delta-like 3 (Drosophila)	1.412	0.473477	-0.0888582	-0.48052	-1.64625	-0.792745	0	0.0220105	0.980776	0.218391	0.289854	-0.137117	0	-0.968223	1.03336	0.418355	2.21348	1.11875	2.90937	1.89157	2.96752	1.51465	0.965118	0.397718	2.22319	0.971696	1.32078	0.706817	-1.71742	-1.24823
54567	DLL4	delta-like 4 (Drosophila)	1.04672	0.211413	0.808725	0.145184	0.171868	0.279594	1.24157	1.12044	0.934682	0.18308	1.17354	0.670953	0.209228	-0.681626	1.39593	0.769133	0.371124	-0.0623838	0.37707	0.17761	0.323593	-0.150096	-1.36161	-1.69121	1.63823	0.362963	-3.37335	-2.09429	1.36431	0.677641
23341	DNAJC16	DnaJ (Hsp40) homolog, subfamily C, member 16	-0.157132	-0.652259	-2.66234	-2.27449	-3.24177	-1.73379	-0.355311	-0.292337	1.10718	0.315225	0.0480054	-0.358272	0.79419	0.119646	-2.3505	-2.85544	1.12317	0.419753	-0.749391	-0.584824	-0.354377	-0.576979	1.00176	0.430617	1.05445	-0.244543	1.03978	0.539138	-0.40005	-0.424965
79962	DNAJC22	DnaJ (Hsp40) homolog, subfamily C, member 22	1.39289	0.459768	0.480269	-0.0837819	0.719356	0.602505	0	0.0220105	1.2043	0.389617	1.34346	0.826339	1.79419	1.48943	0	-0.581393	1.5069	0.665763	0	-0.077606	0	-0.353846	1.36149	0.753581	1.88616	0.620966	1.57659	0.859469	1.0882	0.505097
548645	DNAJC25	DnaJ (Hsp40) homolog, subfamily C , member 25	0.438121	-0.22521	0.68278	0.057388	-1.39397	-0.643945	0.891029	0.810314	2.16472	1.12535	0.758499	0.291428	1.20923	0.688158	0.728504	0.123416	1.45958	0.635422	-1.21121	-0.897403	-2.58859	-1.98375	1.17206	0.583513	2.76751	1.53814	-1.25969	-0.833018	0.0617116	-0.136394
80331	DNAJC5	DnaJ (Hsp40) homolog, subfamily C, member 5	2.38808	1.17374	3.19397	1.80793	4.50572	2.83573	0.522801	0.484538	2.38453	1.29374	1.58892	1.05079	0.503704	-0.278257	1.4484	0.819893	3.28786	1.80753	1.57111	0.985783	3.52395	1.86501	1.52325	0.89881	2.59243	1.35593	0.68681	0.328512	2.58109	1.43805
92737	DNER	delta/notch-like EGF repeat containing	-2.72097	-2.49161	1.3808	0.543979	-2.09081	-1.05495	-1.15278	-0.99787	0	-0.532931	-1.27665	-1.56958	0.209228	-0.681626	-0.263034	-0.835872	-2.38377	-1.82854	1.24642	0.766024	1.69631	0.714232	-1.54549	-1.8563	-1.33867	-2.73491	-5.32685	-3.26	-0.917863	-0.748564
135656	DPCR1	diffuse panbronchiolitis critical region 1	0.313823	-0.314384	0.741876	0.098584	-2.7022	-1.41555	-0.678072	-0.577887	0.242636	-0.34706	1.17354	0.670953	1.01658	0.424276	1.1646	0.545331	0.836065	0.235689	1.63059	1.02605	2.6744	1.33008	0	-0.468763	0	-1.34184	2.13421	1.19222	-4.01986	-2.68711
57628	DPP10	dipeptidyl-peptidase 10 (non-functional)	1.00957	0.184759	1.12753	0.367421	1.47143	1.04608	1.32521	1.19444	0.753751	0.044478	0.0480054	-0.358272	1.01658	0.424276	0.888969	0.278662	1.14828	0.435851	1.85626	1.17879	2.10644	0.972473	-0.674176	-1.07404	1.72569	0.45398	1.0764	0.560993	1.76299	0.926794
1803	DPP4	dipeptidyl-peptidase 4	1.1975	0.319586	0.273763	-0.227737	-2.39859	-1.23648	1.43629	1.29271	-0.712819	-1.07898	0.981412	0.495268	-0.790772	-2.05141	0.728504	0.123416	-1.15641	-1.04168	-1.28273	-0.945809	1.89899	0.841853	-0.0612783	-0.523779	1.72569	0.45398	0.717853	0.347037	1.13977	0.537324
1804	DPP6	dipeptidyl-peptidase 6	0.573467	-0.128109	-1.77865	-1.65847	0.372364	0.397847	-0.729933	-0.623769	-2.52764	-2.46923	0.49983	0.0548918	0.727763	0.0286552	2.25575	1.60099	-1.91629	-1.52884	1.16829	0.71314	3.23286	1.68172	-1.06913	-1.42863	0.514573	-0.806356	1.53349	0.833747	-1.01425	-0.808798
23333	DPY19L1	dpy-19-like 1 (C. elegans)	2.24089	1.06814	1.68117	0.753367	1.85949	1.27497	2.80982	2.50789	2.10496	1.07957	2.17354	1.58539	0.977204	0.370336	2.7285	2.05837	0.342086	-0.0810003	0.87437	0.514203	0.585885	0.0150558	1.36079	0.752948	2.22319	0.971696	0.0586412	-0.0463329	1.31136	0.644556
147991	DPY19L3	dpy-19-like 3 (C. elegans)	2.99697	1.61057	1.83858	0.863091	-1.83071	-0.901538	0.912066	0.828926	1.05919	0.278462	0.758499	0.291428	0.79419	0.119646	0.440573	-0.15515	2.53812	1.32688	1.3699	0.8496	3.15792	1.63453	0.966045	0.39855	2.68263	1.4498	1.63164	0.892319	2.28636	1.25387
286148	DPY19L4	dpy-19-like 4 (C. elegans)	3.73203	2.13792	1.58443	0.685924	1.42082	1.01623	-0.297958	-0.241597	2.7058	1.53984	0.176266	-0.240986	1.37915	0.920918	2.13289	1.48213	3.18381	1.74082	-0.459047	-0.388307	2.83037	1.42829	0.114188	-0.366245	2.59243	1.35593	0.674216	0.320998	3.05638	1.73508
1812	DRD1	dopamine receptor D1	1.90554	0.827554	0.742323	0.0988951	0.793357	0.646151	-1.22865	-1.06499	0.376525	-0.244495	3.44231	2.7456	1.53116	1.12913	1.59524	0.961959	-1.71914	-1.40245	1.699	1.07234	1.15891	0.37586	1.47197	0.852773	1.22319	-0.0689394	0	-0.0813257	1.43615	0.722538
1813	DRD2	dopamine receptor D2	-2.42429	-2.27877	0.457594	-0.0995887	1.42275	1.01737	0.408458	0.383378	0	-0.532931	0	-0.40217	0.957105	0.342803	0.728504	0.123416	-2.50716	-1.90765	0.0589935	-0.0376768	0.608716	0.0294311	-0.119802	-0.576321	-0.584963	-1.95057	0.913259	0.463641	0.614305	0.20894
1814	DRD3	dopamine receptor D3	1.34399	0.424679	1.43061	0.578699	-3.36151	-1.80442	0.956914	0.868603	1.84875	0.8833	1.79832	1.24228	1.79419	1.48943	0	-0.581393	1.34787	0.563807	2.16609	1.38849	1.59355	0.649533	1.11052	0.528262	0.223194	-1.10957	0.592752	0.272386	-1.23735	-0.94822
1815	DRD4	dopamine receptor D4	1.27065	0.372065	0.242842	-0.249292	1.11528	0.836027	0.199532	0.198539	1.00176	0.234462	0.676679	0.21661	1.20923	0.688158	-0.947533	-1.49811	0	-0.300311	-0.445903	-0.379411	1.12566	0.354924	1.24261	0.646845	0	-1.34184	0.717853	0.347037	0.0347925	-0.153217
1816	DRD5	dopamine receptor D5	0.573467	-0.128109	1.32823	0.507328	0.465847	0.452984	0.932801	0.84727	0.678091	-0.0134806	0.980891	0.494792	0.531156	-0.240654	0.810966	0.203196	-1.24141	-1.09618	1.53446	0.960979	2.15212	1.00123	0.887012	0.327595	0.445587	-0.878145	-1.86235	-1.19264	2.16983	1.18104
1823	DSC1	desmocollin 1	1.26211	0.365938	0.74366	0.0998276	-3.60765	-1.94959	-1.77873	-1.55166	0.664999	-0.02351	0	-0.40217	1.37915	0.920918	1.2849	0.661713	-3.33587	-2.43893	1.68714	1.06432	1.58788	0.645957	0.0356839	-0.436726	1.33867	0.0512303	-2.21118	-1.4008	-2.46811	-1.71737
1824	DSC2	desmocollin 2	1.1753	0.303662	-0.684811	-0.895957	-3.29738	-1.76659	-0.5116	-0.430607	1.58208	0.67902	0.837076	0.363282	1.53116	1.12913	1.4484	0.819893	-2.46356	-1.8797	0.711246	0.403794	-0.562691	-0.708144	1.47197	0.852773	1.22319	-0.0689394	-1.773	-1.13933	-2.53004	-1.75607
1825	DSC3	desmocollin 3	-0.534574	-0.923045	-0.831691	-0.998347	-2.88526	-1.52352	-2.04139	-1.78403	1.62526	0.712099	0	-0.40217	0.79419	0.119646	0.100473	-0.484188	-3.90402	-2.80318	-1.23977	-0.916731	2.61807	1.29462	0.887012	0.327595	1.54512	0.26607	-2.88455	-1.80261	-2.85586	-1.95968
1826	DSCAM	Down syndrome cell adhesion molecule	-3.23859	-2.86297	1.06321	0.322585	-3.73465	-2.02449	-1.07692	-0.930753	-2.35267	-2.33519	0.495464	0.0509001	1.83454	1.54469	-1.34375	-1.88143	-3.83899	-2.76149	-1.89008	-1.35689	-0.951045	-0.95267	-3.47217	-3.58607	1.63823	0.362963	-4.91345	-3.01331	-4.33739	-2.88555
57453	DSCAML1	Down syndrome cell adhesion molecule like 1	-3.39097	-2.97229	1.06547	0.32416	0.987218	0.760492	-0.932801	-0.803249	-1.67096	-1.81297	0.676679	0.21661	1.33311	0.857843	-0.477478	-1.04334	-0.625463	-0.701295	-1.18874	-0.88219	0.788834	0.142842	0.888969	0.329351	-0.96016	-2.34102	-4.03264	-2.48771	-0.830155	-0.693752
1829	DSG2	desmoglein 2	2.03444	0.920028	-1.22896	-1.27528	-2.274	-1.163	0.62298	0.573168	-1.42374	-1.62359	0	-0.40217	1.79419	1.48943	0.962969	0.350255	1.50963	0.667509	0.706953	0.400888	0.776842	0.135291	1.17687	0.587833	2.33867	1.09187	-0.933846	-0.638577	-1.92859	-1.3802
147409	DSG4	desmoglein 4	0.0220569	-0.523704	-1.80914	-1.67972	-1.87866	-0.92982	-2.67023	-2.34037	1.12722	0.330572	-2.45208	-2.64444	0	-0.968223	1.64104	1.00627	-2.06184	-1.62215	-0.795305	-0.615901	1.79804	0.778287	0.523883	0.00157769	1.88616	0.620966	-5.64779	-3.45152	-2.15236	-1.52005
667	DST	dystonin	1.82941	0.772936	1.24612	0.450091	1.17187	0.8694	-0.379637	-0.313859	2.19066	1.14522	0.980891	0.494792	1.66866	1.31748	1.03336	0.418355	1.49595	0.658744	0.883707	0.520522	0.965887	0.254323	0.719044	0.176793	0.808157	-0.500842	2.2952	1.28828	-1.46264	-1.08901
1837	DTNA	dystrobrevin, alpha	1.10659	0.254366	1.52733	0.646121	0.558892	0.507862	-0.844051	-0.724731	-1.97966	-2.04945	0.981412	0.495268	1.37915	0.920918	1.4484	0.819893	0.278358	-0.121856	0.985612	0.589496	2.07835	0.954784	0.805471	0.254387	1.22319	-0.0689394	1.29678	0.692498	-2.58877	-1.79277
53905	DUOX1	dual oxidase 1	0.623508	-0.0922089	-0.163017	-0.532216	0.863746	0.687667	1.60783	1.44448	-2.401	-2.37221	0.588574	0.136043	1.20923	0.688158	-2.30345	-2.80992	-2.44119	-1.86536	-2.48388	-1.7588	-2.9436	-2.20728	1.41813	0.80443	1.80816	0.539793	-0.9705	-0.660449	0.427919	0.0924614
50506	DUOX2	dual oxidase 2	0.971431	0.1574	1.32823	0.507328	-2.38653	-1.22937	-2.0657	-1.80554	-1.49263	-1.67635	-2.40127	-2.59797	1.20923	0.688158	0	-0.581393	-2.62411	-1.98263	-1.73375	-1.25108	0.437183	-0.0785746	0.416774	-0.0945845	0.638232	-0.677672	-3.43558	-2.13143	-1.5926	-1.17023
90527	DUOXA1	dual oxidase maturation factor 1	0.864516	0.0806961	1.32823	0.507328	1.48477	1.05395	0.844051	0.768752	0.686754	-0.00684445	0.395929	-0.0401189	0.531156	-0.240654	0.341481	-0.251019	0.0715642	-0.254432	-2.56528	-1.81389	0.531268	-0.0193341	1.24107	0.645471	1.44559	0.16249	-0.948186	-0.647134	0.842956	0.351832
284254	DYNAP	dynactin associated protein	0	-0.539528	0	-0.418577	0	0.178225	0.187707	0.188077	-0.61595	-1.00478	0	-0.40217	0	-0.968223	1.03336	0.418355	-2.02385	-1.5978	-0.599708	-0.483512	-2.54369	-1.95547	-0.401781	-0.829482	0.808157	-0.500842	-2.9402	-1.83582	0.855283	0.359536
8291	DYSF	dysferlin	2.10071	0.967574	-1.10768	-1.19074	-4.1917	-2.29406	0.29874	0.286309	-4.2727	-3.80602	0.836501	0.362756	1.37915	0.920918	-1.35896	-1.89615	-3.10252	-2.28933	-1.37895	-1.01094	1.98581	0.896519	-1.22049	-1.56451	0	-1.34184	-3.99865	-2.46743	1.35565	0.672235
10682	EBP	emopamil binding protein (sterol isomerase)	1.44948	0.500362	1.63895	0.72393	1.2756	0.930579	1.27235	1.14767	0.963846	0.205421	1.7588	1.20614	1.5175	1.11042	1.226	0.604734	-0.589469	-0.678219	-0.0555788	-0.115224	2.34191	1.12073	1.35938	0.751682	2.33867	1.09187	0.37485	0.142358	-0.957964	-0.773624
1889	ECE1	endothelin converting enzyme 1	1.37353	0.445875	0.527414	-0.0509174	-0.709942	-0.240504	1.377	1.24026	-1.7329	-1.86041	-1.46467	-1.74152	1.90967	1.64761	0.888969	0.278662	0.949054	0.308126	0.115669	0.000683595	0.837489	0.173478	-1.62617	-1.92873	1.88616	0.620966	1.38627	0.745897	1.33258	0.657817
9427	ECEL1	endothelin converting enzyme-like 1	0.399096	-0.253207	0.38109	-0.152919	0.994991	0.765076	1.56622	1.40766	0	-0.532931	0.0519743	-0.354643	0	-0.968223	-2.83678	-3.32591	0.504174	0.0229142	1.24642	0.766024	2.39043	1.15128	0	-0.468763	-1.33867	-2.73491	0	-0.0813257	0.539479	0.162179
641700	ECSCR	endothelial cell surface expressed chemotaxis and apoptosis regulator	0.733932	-0.0129881	0.617319	0.0117551	0.793357	0.646151	0	0.0220105	1.00868	0.239768	3.21207	2.53506	1.1428	0.597167	0.962969	0.350255	0.614958	0.0939377	0	-0.077606	0	-0.353846	1.41745	0.803822	1.44559	0.16249	0	-0.0813257	0.342462	0.0390565
1896	EDA	ectodysplasin A	1.85058	0.78812	1.12787	0.367659	-0.965016	-0.390948	0.186923	0.187383	1.85091	0.884955	1.23243	0.724808	1.78282	1.47385	1.2849	0.661713	1.40188	0.598429	0.878009	0.516666	0.425421	-0.0859804	1.92707	1.26136	2.09766	0.841064	1.45976	0.789752	1.95074	1.04413
60401	EDA2R	ectodysplasin A2 receptor	1.5304	0.558416	1.27304	0.46886	-1.64007	-0.789097	0.724359	0.662859	1.32507	0.482138	1.04801	0.556163	1.78282	1.47385	1.85049	1.20891	-2.50315	-1.90508	-1.39033	-1.01863	0.709302	0.0927646	1.52325	0.89881	2.28209	1.03298	1.10432	0.577652	-0.957506	-0.773338
10913	EDAR	ectodysplasin A receptor	1.20847	0.327457	-1.88874	-1.73522	1.05639	0.801291	0.0597269	0.0748516	1.48669	0.605943	0.910502	0.430425	0	-0.968223	0.888969	0.278662	1.41356	0.605919	-0.204807	-0.216227	0.919632	0.225199	0.806507	0.255317	0.223194	-1.10957	0	-0.0813257	0.733156	0.283214
10876	EDDM3A	epididymal protein 3A	0.891996	0.100411	1.12753	0.367421	-1.20834	-0.534461	0.865779	0.787975	1.18913	0.378002	0.289013	-0.137886	1.36397	0.900116	1.2849	0.661713	1.68688	0.781147	0.333269	0.147964	-0.00525573	-0.357155	0	-0.468763	1.22319	-0.0689394	1.48791	0.806551	-0.789068	-0.668075
1909	EDNRA	endothelin receptor type A	1.63981	0.63691	-1.60327	-1.53621	-2.62736	-1.37141	0.77267	0.7056	1.49164	0.609736	1.71817	1.16899	1.01658	0.424276	0.662965	0.0600089	-1.18402	-1.05938	-2.30844	-1.64005	1.09494	0.335583	0.887991	0.328473	1.88616	0.620966	0.442028	0.182445	1.05103	0.481868
1910	EDNRB	endothelin receptor type B	1.38324	0.452845	0.899023	0.20813	2.12095	1.42917	-2.22485	-1.94634	1.36037	0.509179	0.837651	0.363808	1.20923	0.688158	0.810966	0.203196	0.689287	0.14159	-1.53965	-1.1197	1.69413	0.712861	-1.21883	-1.56303	1.44559	0.16249	2.10867	1.17698	0.779343	0.312078
9813	EFCAB14	EF-hand calcium binding domain 14	2.05282	0.933213	-0.480465	-0.753508	0.926803	0.724859	-0.712996	-0.608785	0.411579	-0.217642	-0.192645	-0.578332	0.77135	0.0883605	-0.540568	-1.10438	1.82938	0.8725	-2.45549	-1.73958	1.57996	0.640973	0.00587657	-0.463487	1.63823	0.362963	-2.16684	-1.37434	-0.871128	-0.719357
1947	EFNB1	ephrin-B1	1.71866	0.693483	0.965161	0.254235	1.27878	0.932459	1.18915	1.07407	2.19976	1.15219	-1.41273	-1.69403	1.5175	1.11042	1.88897	1.24614	1.28224	0.521729	-1.97088	-1.41158	1.25259	0.434843	1.24031	0.644783	1.88616	0.620966	1.45976	0.789752	2.03208	1.09496
1948	EFNB2	ephrin-B2	2.31382	1.12046	1.68055	0.752934	2.6957	1.76817	0.514828	0.477485	1.62976	0.715546	1.23374	0.726007	0	-0.968223	1.34148	0.716456	1.33871	0.557932	-2.6009	-1.838	0.123961	-0.275794	1.47328	0.853944	1.96016	0.697973	0.0904284	-0.0273646	2.00453	1.07774
1949	EFNB3	ephrin-B3	1.18442	0.310206	1.09718	0.346266	-2.02407	-1.01558	-0.769207	-0.658516	1.26883	0.439057	0.980891	0.494792	0.503704	-0.278257	1.10047	0.483287	1.41065	0.604053	-2.56528	-1.81389	-0.934459	-0.942227	-1.20469	-1.55033	-1.22239	-2.6139	0.699667	0.336185	1.95074	1.04413
1950	EGF	epidermal growth factor	-1.00773	-1.26249	-2.54519	-2.19283	-2.46986	-1.27852	-0.479173	-0.401919	-2.82782	-2.69918	0.496921	0.052232	0.79419	0.119646	-1.31642	-1.855	0	-0.300311	0.206259	0.0619983	0.0112062	-0.34679	1.04009	0.465029	0.808157	-0.500842	-2.46891	-1.55459	-3.84302	-2.5766
1956	EGFR	epidermal growth factor receptor	3.20299	1.75838	1.92985	0.92672	-2.57519	-1.34064	2.97677	2.6556	1.3069	0.468217	1.34346	0.826339	1.5175	1.11042	-0.0515303	-0.631247	0.0286812	-0.281924	-0.53738	-0.441326	0.748234	0.117278	1.3622	0.754213	1.96016	0.697973	-2.25108	-1.4246	-1.31548	-0.997045
392617	ELFN1	extracellular leucine-rich repeat and fibronectin type III domain containing 1	1.8365	0.778022	1.2162	0.429234	0.636393	0.553573	0.240005	0.234346	2.58092	1.44418	1.11309	0.615675	0	-0.968223	1.226	0.604734	2.23021	1.12947	0	-0.077606	0.466437	-0.060155	1.71684	1.07261	2.54512	1.30671	1.42408	0.76846	0.746453	0.291524
114794	ELFN2	extracellular leucine-rich repeat and fibronectin type III domain containing 2	1.81513	0.762688	0.999502	0.278175	-1.33082	-0.6067	-1.87184	-1.63403	1.07578	0.291166	-0.590296	-0.941958	0.79419	0.119646	1.34148	0.716456	1.56063	0.700206	1.0162	0.610196	0.973305	0.258994	1.5264	0.901634	0.223194	-1.10957	1.23168	0.653649	-1.35267	-1.02029
64123	ELTD1	EGF, latrophilin and seven transmembrane domain containing 1	0.905543	0.11013	-2.78495	-2.35996	-1.76501	-0.862788	0	0.0220105	1.07578	0.291166	0.495464	0.0509001	1.19213	0.66474	0.728504	0.123416	-2.17017	-1.69161	-4.39738	-3.05393	0.912094	0.220453	1.0766	0.497802	1.96016	0.697973	-1.31232	-0.864423	-2.48114	-1.72551
133418	EMB	embigin	2.5304	1.27584	0.509166	-0.063638	1.03393	0.788044	0.566219	0.522951	2.34403	1.26271	1.34387	0.826709	1.79419	1.48943	0.547932	-0.0512828	2.9602	1.59747	1.14367	0.696479	0.377847	-0.115935	0.752026	0.206404	2.33867	1.09187	-1.40785	-0.921431	-1.49222	-1.1075
284361	EMC10	ER membrane protein complex subunit 10	2.45409	1.2211	1.45475	0.595524	0.938599	0.731816	-1.78002	-1.55279	1.49164	0.609736	1.34346	0.826339	1.01658	0.424276	-1.87447	-2.39489	1.56849	0.705245	0.531976	0.282457	-1.96669	-1.59217	1.3622	0.754213	0.808157	-0.500842	1.59275	0.869113	1.2716	0.619708
55831	EMC3	ER membrane protein complex subunit 3	0.947664	0.140349	1.05189	0.314695	0.164995	0.27554	0.131068	0.137968	0.584403	-0.0852507	-3.05494	-3.19572	0.79419	0.119646	1.34148	0.716456	0.609889	0.090688	-3.71004	-2.58871	-0.539855	-0.693765	0.649564	0.114414	2.16179	0.907801	1.71785	0.943764	1.50458	0.765305
51234	EMC4	ER membrane protein complex subunit 4	0.155871	-0.427703	-0.817846	-0.988696	-1.02256	-0.42489	-1.79271	-1.56402	1.13989	0.34028	0	-0.40217	1.01658	0.424276	-0.440573	-1.00764	0.364922	-0.0663603	-2.34466	-1.66456	-3.25195	-2.40143	1.06779	0.489892	1.58496	0.30753	0.00599813	-0.0777465	0.046729	-0.145757
56851	EMC7	ER membrane protein complex subunit 7	1.41971	0.479009	-1.94381	-1.7736	-2.43396	-1.25734	-1.7399	-1.5173	1.58903	0.684343	0.173536	-0.243483	0.209228	-0.681626	0.810966	0.203196	-0.11262	-0.372512	-2.27645	-1.6184	-3.45701	-2.53055	0.562248	0.0360216	2.22319	0.971696	1.37171	0.737209	-0.0901852	-0.231319
51705	EMCN	endomucin	0.718665	-0.0239408	-2.25616	-1.99134	0.863746	0.687667	-0.566219	-0.47893	1.14619	0.345102	0.676679	0.21661	0.531156	-0.240654	0.641041	0.0387982	0.874615	0.260404	-0.583329	-0.472426	-1.10153	-1.04742	0.966971	0.399381	1.44559	0.16249	0.264594	0.076565	0.984954	0.440572
2012	EMP1	epithelial membrane protein 1	1.78613	0.741883	1.24417	0.44873	0.471429	0.456276	-0.217193	-0.170142	1.3223	0.48001	-1.28894	-1.58082	1.20923	0.688158	1.2849	0.661713	0.945018	0.305539	-0.653226	-0.519736	1.29408	0.460969	0.0917026	-0.386433	1.96016	0.697973	0.923989	0.470044	1.84913	0.980626
2013	EMP2	epithelial membrane protein 2	-0.2439	-0.714508	2.65895	1.43498	0.0877918	0.230005	0.257793	0.250083	1.76811	0.821524	0	-0.40217	0.209228	-0.681626	1.226	0.604734	1.55273	0.69514	-0.102761	-0.147159	0.171212	-0.246043	0.802361	0.251595	1.72569	0.45398	1.30883	0.699687	0.342462	0.0390565
2014	EMP3	epithelial membrane protein 3	0.556393	-0.140358	0.781742	0.126375	0.793357	0.646151	-2.92455	-2.56537	0.766065	0.0539116	1.34346	0.826339	0.79419	0.119646	0.36257	-0.230615	0.614958	0.0939377	-0.698998	-0.550716	-0.0703964	-0.398171	0.623587	0.0910913	1.22319	-0.0689394	1.70879	0.938355	0.99613	0.447556
2015	EMR1	egf-like module containing, mucin-like, hormone receptor-like 1	0.556393	-0.140358	1.21631	0.429309	-2.37428	-1.22214	0.0964866	0.107373	1.00868	0.239768	1.04801	0.556163	1.5175	1.11042	1.34148	0.716456	-3.20434	-2.35461	-0.620758	-0.49776	1.13079	0.358155	1.17768	0.588551	2.96016	1.73861	-1.82346	-1.16943	-3.44788	-2.32966
30817	EMR2	egf-like module containing, mucin-like, hormone receptor-like 2	0.718665	-0.0239408	-1.32442	-1.34183	0.0563912	0.211484	0	0.0220105	1.13357	0.335437	0.495464	0.0509001	1.36397	0.900116	1.59524	0.961959	-2.93399	-2.18129	-2.32193	-1.64918	2.99089	1.52936	0.624761	0.0921456	1.80816	0.539793	-0.958585	-0.65334	2.4174	1.33575
84658	EMR3	egf-like module containing, mucin-like, hormone receptor-like 3	0.93226	0.129298	0.928807	0.228893	-2.42583	-1.25255	1.4217	1.2798	1.37652	0.521553	-2.20163	-2.41542	1.19213	0.66474	0.888969	0.278662	0.17255	-0.189689	0.742117	0.424689	3.34051	1.7495	0.525141	0.00270743	1.22319	-0.0689394	-4.7096	-2.89167	2.21124	1.20692
23052	ENDOD1	endonuclease domain containing 1	1.42146	0.480264	0.192481	-0.284398	0.553638	0.504764	-1.32521	-1.15042	1.37116	0.517443	0.911048	0.430925	0.997028	0.39749	1.39593	0.769133	1.86188	0.893337	-1.46722	-1.07068	1.23395	0.423107	1.76184	1.11301	0.584963	-0.733106	0.985329	0.506647	0.66439	0.24024
2022	ENG	endoglin	-1.62293	-1.70386	-1.27049	-1.30423	0.994991	0.765076	0.227898	0.223634	1.42102	0.55564	0.395929	-0.0401189	1.37915	0.920918	1.03336	0.418355	1.28542	0.52377	0.866297	0.508738	0.688007	0.0793566	1.92373	1.25836	1.54512	0.26607	0.849557	0.425628	1.60329	0.826988
2028	ENPEP	glutamyl aminopeptidase (aminopeptidase A)	-2.52036	-2.3477	0.0319508	-0.396304	-2.24387	-1.14522	-0.034924	-0.00888713	-1.83276	-1.93692	0.396709	-0.0394052	1.66866	1.31748	-1.38681	-1.9231	-1.91467	-1.52781	-3.36632	-2.35607	-1.17727	-1.09511	1.30327	0.701312	1.88616	0.620966	-2.8826	-1.80145	-2.24009	-1.57487
5167	ENPP1	ectonucleotide pyrophosphatase/phosphodiesterase 1	0	-0.539528	0.901177	0.209632	-1.80898	-0.888726	-0.889214	-0.764687	-2.36452	-2.34427	0.676037	0.216022	0.79419	0.119646	0	-0.581393	1.41065	0.604053	-1.0142	-0.764059	0.20406	-0.22536	1.11052	0.528262	2.33867	1.09187	-4.00835	-2.47322	-1.15714	-0.898098
5168	ENPP2	ectonucleotide pyrophosphatase/phosphodiesterase 2	2.28302	1.09836	0.943897	0.239412	-0.357844	-0.0328342	1.05817	0.958186	0.315407	-0.291314	0.8388	0.364859	1.5175	1.11042	2.52368	1.86021	0.0410074	-0.274021	-0.369551	-0.327733	4.11762	2.23881	0.00134762	-0.467554	2.09766	0.841064	-2.25867	-1.42914	-1.68134	-1.22569
5169	ENPP3	ectonucleotide pyrophosphatase/phosphodiesterase 3	-2.58058	-2.3909	1.54966	0.661686	-2.79759	-1.47181	-2.80083	-2.45591	0.845117	0.114469	-2.46396	-2.65531	1.20923	0.688158	0.810966	0.203196	-2.23795	-1.73506	-1.45563	-1.06284	-1.08457	-1.03674	0.717944	0.175805	1.54512	0.26607	-2.05569	-1.30801	1.53182	0.782327
22875	ENPP4	ectonucleotide pyrophosphatase/phosphodiesterase 4 (putative)	1.38324	0.452845	1.18637	0.40844	1.2724	0.928695	0.0357041	0.0535983	1.52796	0.63756	0.396709	-0.0394052	0.531156	-0.240654	0.810966	0.203196	2.245	1.13896	-1.89185	-1.35809	0.421532	-0.0884292	1.5264	0.901634	1.22319	-0.0689394	-0.431712	-0.33894	0.885809	0.378612
59084	ENPP5	ectonucleotide pyrophosphatase/phosphodiesterase 5 (putative)	1.03444	0.202604	0.928937	0.228984	0.337578	0.37733	0.0357041	0.0535983	1.36847	0.515383	1.11261	0.615241	0.79419	0.119646	1.4484	0.819893	2.14828	1.07695	-1.40872	-1.03108	1.0392	0.300485	1.24261	0.646845	1.09766	-0.199571	-2.06255	-1.3121	-1.11216	-0.869988
953	ENTPD1	ectonucleoside triphosphate diphosphohydrolase 1	0.467857	-0.203877	0.724317	0.0863431	0.719356	0.602505	-0.82199	-0.705214	0.856679	0.123326	0.758499	0.291428	1.01658	0.424276	0.888969	0.278662	0.961046	0.315814	-1.98937	-1.42409	-0.934459	-0.942227	0.810574	0.258969	0.96016	-0.342662	0	-0.0813257	1.43615	0.722538
954	ENTPD2	ectonucleoside triphosphate diphosphohydrolase 2	-1.53789	-1.64285	0.898067	0.207464	1.21305	0.893689	0.915845	0.832269	1.11122	0.318315	1.0485	0.556618	0.209228	-0.681626	1.54793	0.916192	0.787172	0.204344	0.558785	0.300602	0.119903	-0.278349	1.66926	1.0299	1.33867	0.0512303	0	-0.0813257	1.52015	0.775034
956	ENTPD3	ectonucleoside triphosphate diphosphohydrolase 3	1.70323	0.682413	0.328227	-0.189771	-1.46243	-0.684328	1.62067	1.45583	-2.0667	-2.11612	-2.38082	-2.57928	0.79419	0.119646	1.39593	0.769133	0.0350469	-0.277843	-1.24642	-0.921236	-1.34723	-1.20213	0.805471	0.254387	1.44559	0.16249	-2.32193	-1.46688	1.13977	0.537324
955	ENTPD6	ectonucleoside triphosphate diphosphohydrolase 6 (putative)	2.20299	1.04095	2.11238	1.05396	4.10634	2.60017	1.85496	1.66311	2.35375	1.27015	1.9105	1.34486	0	-0.968223	1.1646	0.545331	2.53803	1.32681	0.913435	0.540643	1.59484	0.650342	0.886033	0.326716	2.16179	0.907801	-0.872906	-0.602213	-0.252273	-0.332614
57089	ENTPD7	ectonucleoside triphosphate diphosphohydrolase 7	1.24089	0.350717	0.999751	0.278348	0.471429	0.456276	-0.26107	-0.208961	1.00868	0.239768	1.11214	0.614807	1.53116	1.12913	0.448396	-0.147581	0.800582	0.212941	-1.09945	-0.821755	-0.508468	-0.674002	0.839294	0.284753	0	-1.34184	0.979775	0.503333	-1.14322	-0.889397
377841	ENTPD8	ectonucleoside triphosphate diphosphohydrolase 8	0	-0.539528	1.03244	0.301134	1.10095	0.827573	1.04459	0.946169	1.04242	0.265611	0.589257	0.136667	0.531156	-0.240654	0.728504	0.123416	0.698867	0.147731	1.18829	0.726673	1.98634	0.896852	-0.852565	-1.2342	0.808157	-0.500842	-2.81646	-1.76199	1.18456	0.56531
4072	EPCAM	epithelial cell adhesion molecule	2.1753	1.02109	1.70195	0.767849	0.93086	0.727252	0.77267	0.7056	-0.431334	-0.863354	1.17354	0.670953	1.90967	1.64761	1.10047	0.483287	2.32009	1.1871	2.12715	1.36213	1.9518	0.875105	1.41813	0.80443	0	-1.34184	1.33263	0.713888	1.44208	0.726244
255324	EPGN	epithelial mitogen	0.778786	0.0191914	1.15636	0.387517	0.0489435	0.207092	-1.32521	-1.15042	1.47673	0.598316	1.17399	0.67137	1.37915	0.920918	1.96297	1.31773	1.60225	0.726891	1.99805	1.27476	1.50171	0.591702	0.418129	-0.0933677	0.223194	-1.10957	1.54638	0.841442	-1.7349	-1.25916
2041	EPHA1	EPH receptor A1	1.39289	0.459768	-0.685736	-0.896602	-0.409788	-0.0634711	-1.53424	-1.33535	-1.78714	-1.90197	0.760925	0.293647	0.405835	-0.412317	1.39593	0.769133	-0.1979	-0.427184	-1.7088	-1.23419	3.12031	1.61086	0.946727	0.381206	0.638232	-0.677672	2.00027	1.11229	-1.84665	-1.329
1969	EPHA2	EPH receptor A2	-2.29987	-2.18951	-1.73909	-1.63089	-1.65853	-0.799987	-1.68476	-1.46851	-4.06921	-3.65014	-1.36396	-1.64943	0	-0.968223	0.448396	-0.147581	1.6048	0.728526	-1.36296	-1.00011	0.593629	0.0199313	0.176875	-0.309965	1.63823	0.362963	1.26459	0.673292	1.26567	0.616
2042	EPHA3	EPH receptor A3	-1.42987	-1.56535	-1.17069	-1.23466	-2.15064	-1.09024	-1.72605	-1.50505	-2.33765	-2.32368	0.981932	0.495743	0	-0.968223	-1.62128	-2.14994	-3.44928	-2.51164	-0.552285	-0.451415	1.42148	0.541188	1.67097	1.03143	2.63823	1.4036	-3.37926	-2.09782	-2.11763	-1.49834
2043	EPHA4	EPH receptor A4	1.0114	0.186078	-1.77158	-1.65354	-2.98383	-1.58166	-1.07692	-0.930753	-1.84089	-1.94314	1.49692	0.966668	0.531156	-0.240654	1.2849	0.661713	-1.77076	-1.43554	-2.3347	-1.65782	0.41621	-0.09178	0.304006	-0.195827	0.96016	-0.342662	-3.05733	-1.90572	-2.50876	-1.74277
2044	EPHA5	EPH receptor A5	-2.00296	-1.9765	0.660097	0.0415755	-4.10884	-2.2452	-2.99524	-2.62791	-2.32193	-2.31164	-2.32193	-2.52542	0	-0.968223	1.2849	0.661713	-4.57034	-3.23035	1.70961	1.07953	0.560572	-0.00088308	1.20142	0.609871	1.44559	0.16249	-2.0131	-1.2826	-3.46099	-2.33785
285220	EPHA6	EPH receptor A6	1.49499	0.533015	-2.15225	-1.91891	-4.27599	-2.34378	0.938599	0.8524	2.4325	1.33048	1.3971	0.875387	0	-0.968223	1.39593	0.769133	-3.36825	-2.45969	-0.0193839	-0.0907258	2.27619	1.07935	-0.964685	-1.33486	2.16179	0.907801	-4.64386	-2.85244	-1.21219	-0.932498
2045	EPHA7	EPH receptor A7	-2.58024	-2.39065	-2.4764	-2.14487	-4.93451	-2.73218	-1.10351	-0.954277	-1.23944	-1.4824	-0.126441	-0.517793	0	-0.968223	0.547932	-0.0512828	-3.39552	-2.47717	0.716672	0.407466	1.60576	0.657221	-2.36602	-2.59298	0.96016	-0.342662	-5.52647	-3.37912	-2.01129	-1.43189
2046	EPHA8	EPH receptor A8	1.59034	0.60142	0.480448	-0.0836576	-3.28881	-1.76153	-1.81294	-1.58191	-1.46909	-1.65833	0	-0.40217	0	-0.968223	0	-0.581393	-1.7772	-1.43967	-1.48924	-1.08558	-1.44077	-1.26102	1.24261	0.646845	0.638232	-0.677672	-1.78489	-1.14642	-0.576073	-0.534968
2047	EPHB1	EPH receptor B1	1.85756	0.793132	2.04863	1.00952	-0.565097	-0.155073	-3.2259	-2.83198	0.720489	0.0189983	0.176266	-0.240986	-1.52774	-3.06089	0.810966	0.203196	-2.53726	-1.92694	3.15544	2.05812	2.83719	1.43258	1.66641	1.02734	1.96016	0.697973	-1.25969	-0.833018	1.97644	1.06018
2048	EPHB2	EPH receptor B2	1.77879	0.736615	0.931287	0.230622	-0.0877848	0.126449	0.597233	0.55039	-1.7329	-1.86041	0.289013	-0.137886	1.37915	0.920918	0.888969	0.278662	-0.816265	-0.823618	-0.480568	-0.402873	-0.622925	-0.74607	-2.39372	-2.61784	2.33867	1.09187	-2.42489	-1.52832	-0.499254	-0.486961
2049	EPHB3	EPH receptor B3	2.6194	1.33969	2.4425	1.28409	0.863746	0.687667	1.23396	1.11371	1.54493	0.650556	0.914322	0.433919	1.53116	1.12913	0.810966	0.203196	-2.42005	-1.8518	4.87151	3.21963	3.93331	2.12276	1.80236	1.14939	2.16179	0.907801	1.94445	1.07898	2.41526	1.33442
2050	EPHB4	EPH receptor B4	2.26211	1.08336	1.74255	0.796149	-0.466806	-0.0971006	-1.60897	-1.40146	3.0765	1.82382	0.760925	0.293647	1.01658	0.424276	2.86986	2.19512	2.69289	1.4261	-0.593849	-0.479547	1.51566	0.600485	1.46871	0.84984	1.44559	0.16249	2.19729	1.22986	1.23285	0.59549
2051	EPHB6	EPH receptor B6	-1.52036	-1.63027	1.61724	0.708797	-2.26554	-1.158	1.72806	1.55085	1.38187	0.525647	1.44806	0.921989	0.628227	-0.107687	2.19563	1.54282	-2.1392	-1.67175	-0.558174	-0.455401	3.20763	1.66584	1.36079	0.752948	1.44559	0.16249	-2.20048	-1.39441	-0.605659	-0.553457
79852	EPHX3	epoxide hydrolase 3	1.99697	0.893143	1.80041	0.836488	0.788893	0.643519	1.52585	1.37194	1.76197	0.816824	1.04801	0.556163	1.36397	0.900116	1.10047	0.483287	-0.942797	-0.904737	1.13547	0.690927	3.57652	1.89811	1.30254	0.700654	0.96016	-0.342662	1.15366	0.607096	2.89326	1.63314
253152	EPHX4	epoxide hydrolase 4	-0.74	-1.07042	1.09602	0.345455	-3.3505	-1.79792	1.2581	1.13506	0.770147	0.0570384	1.11214	0.614807	0.997028	0.39749	1.34148	0.716456	1.40188	0.598429	0.230974	0.0787263	-0.420762	-0.618779	1.01682	0.444137	1.09766	-0.199571	-0.604075	-0.441794	1.77286	0.932961
2057	EPOR	erythropoietin receptor	1.64789	0.642709	1.27284	0.468716	1.05267	0.799097	1.59488	1.43302	1.25725	0.430183	1.04801	0.556163	1.36397	0.900116	1.96297	1.31773	0.800582	0.212941	-1.07739	-0.806828	3.00089	1.53566	1.17848	0.589269	2.54512	1.30671	1.22699	0.650855	2.78901	1.56799
94240	EPSTI1	epithelial stromal interaction 1 (breast)	0.679427	-0.0520908	0.390622	-0.146275	-1.07283	-0.454535	0.953242	0.865354	0.852835	0.120382	0.758499	0.291428	1.66866	1.31748	1.226	0.604734	1.03126	0.360828	-0.096805	-0.143127	-1.42411	-1.25054	-2.12007	-2.37216	0.96016	-0.342662	0.892312	0.451141	-1.54615	-1.1412
54586	EQTN	equatorin, sperm acrosome associated	0.777608	0.0183462	0	-0.418577	-1.35655	-0.621875	-1.4982	-1.30346	0.955894	0.19933	0.495464	0.0509001	0.79419	0.119646	1.10047	0.483287	0.334201	-0.0860551	-1.05895	-0.794345	-0.377928	-0.591808	1.52577	0.90107	1.72569	0.45398	0.798678	0.395267	1.55099	0.794309
2064	ERBB2	v-erb-b2 avian erythroblastic leukemia viral oncogene homolog 2	3.12118	1.69968	0.942458	0.238409	2.16875	1.45737	-0.152783	-0.113158	-0.297988	-0.761204	1.11261	0.615241	1.37915	0.920918	1.49902	0.868873	2.58288	1.35557	1.87575	1.19198	0.473841	-0.0554928	0.419814	-0.0918552	1.54512	0.26607	-1.83402	-1.17573	3.42474	1.96528
2065	ERBB3	v-erb-b2 avian erythroblastic leukemia viral oncogene homolog 3	2.334	1.13494	-0.697161	-0.904567	-1.04088	-0.435691	-2.03018	-1.77411	1.06917	0.286102	-1.14274	-1.44713	1.01658	0.424276	0.810966	0.203196	-0.304706	-0.495658	1.10276	0.668787	0.902798	0.2146	-1.1199	-1.47421	1.44559	0.16249	-1.2315	-0.816195	2.68535	1.50321
2066	ERBB4	v-erb-b2 avian erythroblastic leukemia viral oncogene homolog 4	-0.856837	-1.15424	-0.951866	-1.08212	-5.14306	-2.85519	-0.0985595	-0.0651861	-2.5175	-2.46145	-1.20021	-1.49968	0	-0.968223	0.641041	0.0387982	-4.1677	-2.97222	-2.5816	-1.82494	-0.186874	-0.471511	-1.29974	-1.63567	1.72569	0.45398	-4.41143	-2.71375	-0.262848	-0.339222
2069	EREG	epiregulin	-1.04933	-1.29234	1.57206	0.677306	-2.61727	-1.36546	1.09543	0.991151	1.62526	0.712099	0	-0.40217	1.53116	1.12913	0	-0.581393	1.39305	0.592771	1.59483	1.00184	1.7172	0.727388	0	-0.468763	0.96016	-0.342662	-3.32193	-2.06361	-1.01954	-0.812105
114625	ERMAP	erythroblast membrane-associated protein (Scianna blood group)	2.00957	0.902183	0.817822	0.151526	0.855231	0.682645	-0.034924	-0.00888713	1.53277	0.641247	0	-0.40217	1.20923	0.688158	1.2849	0.661713	1.26944	0.513522	0.592048	0.323116	2.59589	1.28065	-2.08379	-2.33958	1.80816	0.539793	1.72686	0.949139	2.10644	1.14142
405754	ERVFRD-1	endogenous retrovirus group FRD, member 1	NA	NA	0.0331669	-0.395456	0.512181	0.480312	-0.289507	-0.234119	NA	NA	NA	NA	NA	NA	1.34148	0.716456	NA	NA	NA	NA	NA	NA	NA	NA	NA	NA	1.72783	0.949716	NA	NA
100288413	ERVMER34-1	endogenous retrovirus group MER34, member 1	NA	NA	-2.32193	-2.03719	0	0.178225	1.37832	1.24143	NA	NA	NA	NA	NA	NA	0	-0.581393	NA	NA	NA	NA	NA	NA	NA	NA	NA	NA	0	-0.0813257	NA	NA
100271846	ERVV-2	endogenous retrovirus group V, member 2	NA	NA	0	-0.418577	0	0.178225	0	0.0220105	NA	NA	NA	NA	NA	NA	-1.03336	-1.58114	NA	NA	NA	NA	NA	NA	NA	NA	NA	NA	0	-0.0813257	NA	NA
30816	ERVW-1	endogenous retrovirus group W, member 1	NA	NA	NA	NA	NA	NA	NA	NA	NA	NA	NA	NA	NA	NA	NA	NA	NA	NA	NA	NA	NA	NA	NA	NA	NA	NA	NA	NA	NA	NA
90952	ESAM	endothelial cell adhesion molecule	0.850576	0.0706958	-0.0879271	-0.479871	0.859495	0.68516	0.227898	0.223634	1.14304	0.342694	0.289854	-0.137117	1.87795	1.60416	1.85049	1.20891	1.6048	0.728526	-2.1308	-1.51982	1.70644	0.720614	1.47393	0.854529	0.459432	-0.863738	-0.347951	-0.288958	-1.48024	-1.10001
23344	ESYT1	extended synaptotagmin-like protein 1	-1.24496	-1.43269	0.330794	-0.187981	-1.32214	-0.601584	0.438605	0.41005	1.43394	0.565539	0.910502	0.430425	1.37915	0.920918	1.226	0.604734	1.68688	0.781147	0.606872	0.33315	2.63936	1.30802	1.17607	0.587114	1.72569	0.45398	-1.31232	-0.864423	2.62154	1.46333
57488	ESYT2	extended synaptotagmin-like protein 2	1.46786	0.513547	1.94074	0.934307	-1.16584	-0.509395	0.438916	0.410324	-1.45809	-1.6499	2.47214	1.85845	-0.120234	-1.13292	2.1646	1.51281	2.55537	1.33793	1.3108	0.809595	3.04318	1.56229	0.307963	-0.192275	0.652077	-0.663265	3.0777	1.75522	1.53575	0.784784
83850	ESYT3	extended synaptotagmin-like protein 3	2.11244	0.975989	1.93129	0.92772	-1.31525	-0.597521	-0.977019	-0.842369	2.92534	1.70802	0.590622	0.137915	0.79419	0.119646	0.962969	0.350255	-2.14729	-1.67693	0.497476	0.259106	2.89774	1.47071	1.80132	1.14846	0.96016	-0.342662	-1.18169	-0.786472	0.134641	-0.090818
55500	ETNK1	ethanolamine kinase 1	2.27782	1.09463	1.54193	0.656302	-0.747536	-0.262677	0.272458	0.263057	2.50869	1.38885	0.676037	0.216022	1.01658	0.424276	2.13289	1.48213	0.213826	-0.163228	2.65561	1.71982	2.10477	0.971417	0.871245	0.313439	2.54512	1.30671	-0.897849	-0.617097	-1.62878	-1.19284
84141	EVA1A	eva-1 homolog A (C. elegans)	1.87832	0.808025	1.55051	0.662278	0.793357	0.646151	1.38934	1.25118	1.06917	0.286102	1.63297	1.09107	0	-0.968223	0.641041	0.0387982	1.66243	0.765469	0.904757	0.53477	-0.567679	-0.711284	0.965118	0.397718	1.33867	0.0512303	1.0764	0.560993	1.69233	0.882634
55194	EVA1B	eva-1 homolog B (C. elegans)	0.671871	-0.0575121	0.659152	0.0409168	0	0.178225	0.977019	0.88639	1.26305	0.434629	0	-0.40217	1.53116	1.12913	0.448396	-0.147581	1.60735	0.730158	0	-0.077606	2.58232	1.27211	0.806507	0.255317	1.80816	0.539793	0.923989	0.470044	1.42367	0.714743
59271	EVA1C	eva-1 homolog C (C. elegans)	1.56496	0.583208	1.21641	0.429384	0.793357	0.646151	-1.18771	-1.02877	0.686754	-0.00684445	0.736055	0.270905	0.77135	0.0883605	1.54793	0.916192	1.09459	0.401429	0.381121	0.180352	-1.40114	-1.23607	1.17768	0.588551	1.88616	0.620966	1.21424	0.643245	1.19927	0.574503
2121	EVC	Ellis van Creveld syndrome	0.807932	0.0401017	-0.737144	-0.932439	1.32633	0.960504	-0.304217	-0.247133	1.68243	0.755891	0.676037	0.216022	1.20923	0.688158	1.2849	0.661713	-1.89857	-1.51748	-1.77445	-1.27863	0.65199	0.0566781	0.803398	0.252526	1.33867	0.0512303	0.832967	0.415728	1.69918	0.886917
132884	EVC2	Ellis van Creveld syndrome 2	0.918963	0.119758	-2.81979	-2.38425	-2.14751	-1.08839	-0.230924	-0.18229	0.766065	0.0539116	-0.395929	-0.764222	1.53116	1.12913	1.7285	1.09089	-2.14746	-1.67705	-0.457571	-0.387308	-0.00959409	-0.359887	1.17607	0.587114	2.03055	0.771223	-2.35121	-1.48436	-3.11285	-2.12029
2123	EVI2A	ecotropic viral integration site 2A	-0.485427	-0.887785	-1.50494	-1.46767	0.922734	0.722459	-1.04019	-0.898258	1.64095	0.724116	1.0485	0.556618	1.46473	1.03814	1.1646	0.545331	0.694085	0.144666	-1.58333	-1.14927	-1.78289	-1.47644	0.719044	0.176793	0	-1.34184	0.612327	0.284067	0.99613	0.447556
2124	EVI2B	ecotropic viral integration site 2B	1.79343	0.747123	1.18582	0.408059	0.855231	0.682645	-0.944927	-0.813977	1.07907	0.29369	1.0485	0.556618	1.31273	0.829927	1.34148	0.716456	0.782674	0.20146	-0.0683987	-0.123901	-1.74202	-1.4507	0.719044	0.176793	0.415037	-0.909936	0.0904284	-0.0273646	0.824097	0.340047
55218	EXD2	exonuclease 3-5 domain containing 2	-2.28557	-2.17925	-0.289142	-0.620137	-2.65461	-1.38748	-2.4217	-2.12049	2.315	1.24047	-3.04838	-3.18972	-0.531156	-1.69579	-1.99859	-2.51498	2.20593	1.1139	-0.138532	-0.17137	-0.825967	-0.873915	-0.36215	-0.793901	1.22319	-0.0689394	-2.71699	-1.70263	-1.76056	-1.27519
50848	F11R	F11 receptor	4.24223	2.50395	4.3032	2.58118	1.95534	1.33149	-1.32521	-1.15042	2.55882	1.42725	1.049	0.557072	0.209228	-0.681626	1.77032	1.13135	3.57255	1.99005	1.95243	1.24388	1.75536	0.751414	0.268133	-0.228034	2.76751	1.53814	2.56342	1.44834	2.52072	1.40032
2149	F2R	coagulation factor II (thrombin) receptor	1.05889	0.220148	0	-0.418577	-2.39064	-1.23179	0	0.0220105	1.14619	0.345102	1.3971	0.875387	0.209228	-0.681626	0	-0.581393	-1.04788	-0.972105	-0.0647562	-0.121436	-1.16766	-1.08906	0.25871	-0.236494	1.09766	-0.199571	-2.32193	-1.46688	0.733156	0.283214
2150	F2RL1	coagulation factor II (thrombin) receptor-like 1	0	-0.539528	-0.082901	-0.476367	-2.63284	-1.37464	0.673134	0.61754	0.00868224	-0.52628	1.91132	1.34561	1.79419	1.48943	0.341481	-0.251019	0.609889	0.090688	-1.0162	-0.765408	-2.54664	-1.95734	0.017702	-0.452871	1.80816	0.539793	-2.32193	-1.46688	1.34844	0.667723
2151	F2RL2	coagulation factor II (thrombin) receptor-like 2	0	-0.539528	-0.968032	-1.09339	1.11528	0.836027	0.865779	0.787975	1.64095	0.724116	1.11356	0.616109	1.01658	0.424276	0.547932	-0.0512828	-1.85461	-1.4893	2.18442	1.4009	0.104358	-0.288137	0.202127	-0.287295	0.96016	-0.342662	0.849557	0.425628	1.07772	0.498546
9002	F2RL3	coagulation factor II (thrombin) receptor-like 3	1.412	0.473477	1.76217	0.809827	1.37832	0.991166	0.82199	0.749235	1.07248	0.288637	1.11214	0.614807	0.997028	0.39749	0.888969	0.278662	1.46239	0.637227	1.29105	0.796226	3.51081	1.85673	1.24107	0.645471	1.44559	0.16249	0.612327	0.284067	2.15225	1.17005
2152	F3	coagulation factor III (thromboplastin, tissue factor)	1.8365	0.778022	0.429686	-0.119043	0.558892	0.507862	-0.953242	-0.821333	1.32784	0.484261	0.495464	0.0509001	1.36397	0.900116	0.810966	0.203196	1.16566	0.446991	-0.698998	-0.550716	0.764995	0.127832	0.43274	-0.0802508	0.445587	-0.878145	1.77656	0.978795	-1.08908	-0.855562
158584	FAAH2	fatty acid amide hydrolase 2	1.5987	0.60742	0.276443	-0.225869	-1.21597	-0.538959	0.941315	0.854802	-2.4106	-2.37956	1.11214	0.614807	1.36397	0.900116	-0.773996	-1.33021	1.50963	0.667509	-0.599708	-0.483512	0.270162	-0.183739	1.11136	0.529014	1.72569	0.45398	-2.99865	-1.8707	2.00453	1.07774
9415	FADS2	fatty acid desaturase 2	2.13562	0.992616	1.06404	0.323165	1.64135	1.14631	-2.68557	-2.35394	1.80414	0.849129	0.395929	-0.0401189	1.65625	1.30048	0.810966	0.203196	-0.121104	-0.377951	0.698998	0.395504	1.38504	0.518242	0.965118	0.397718	0.808157	-0.500842	-2.32193	-1.46688	1.68189	0.876112
283985	FADS6	fatty acid desaturase 6	2.26736	1.08713	2.42895	1.27464	1.82463	1.2544	1.05817	0.958186	1.32507	0.482138	1.11356	0.616109	1.20923	0.688158	1.85049	1.20891	2.11455	1.05532	3.44458	2.25382	1.99234	0.90063	1.47002	0.851014	2.03055	0.771223	1.22367	0.648871	1.29776	0.636053
23017	FAIM2	Fas apoptotic inhibitory molecule 2	0	-0.539528	0.617805	0.0120942	-1.13984	-0.494062	-1.69844	-1.48062	0.484204	-0.162007	0.495464	0.0509001	1.01658	0.424276	0.962969	0.350255	1.08731	0.396765	1.10276	0.668787	1.28344	0.454272	0.525141	0.00270743	1.54512	0.26607	0	-0.0813257	0.614305	0.20894
9214	FAIM3	Fas apoptotic inhibitory molecule 3	0.807932	0.0401017	2.94413	1.63377	0.443299	0.439685	0.956914	0.868603	0.912696	0.166238	0.0480054	-0.358272	1.78282	1.47385	0	-0.581393	2.35871	1.21186	1.37591	0.853663	2.11408	0.977281	0.887012	0.327595	0	-1.34184	-0.794934	-0.555684	-0.424152	-0.440027
54491	FAM105A	family with sequence similarity 105, member A	2.99062	1.60602	1.54838	0.660797	0.775417	0.635571	-0.444082	-0.370874	2.25998	1.19832	1.49656	0.966335	1.37915	0.920918	0.547932	-0.0512828	3.4283	1.89757	2.97769	1.93781	2.65708	1.31918	1.80444	1.15125	2.49621	1.25581	1.25677	0.668623	1.93325	1.03319
79137	FAM134A	family with sequence similarity 134, member A	-0.777608	-1.0974	-0.543382	-0.797368	-2.07748	-1.04709	0.619886	0.570431	-2.50706	-2.45346	0.862323	0.386369	1.53116	1.12913	0.448396	-0.147581	-0.272138	-0.474778	-1.83004	-1.31625	0.283019	-0.175643	1.20692	0.614808	0	-1.34184	0.0904284	-0.0273646	2.22812	1.21747
162427	FAM134C	family with sequence similarity 134, member C	1.29336	0.388359	0.691603	0.0635387	1.99111	1.35259	-1.17035	-1.01341	-2.07042	-2.11897	0	-0.40217	0.79419	0.119646	0	-0.581393	2.81725	1.50583	-0.583329	-0.472426	-2.34627	-1.83117	0.532275	0.00911216	0.445587	-0.878145	1.88221	1.04184	0.52412	0.152581
338094	FAM151A	family with sequence similarity 151, member A	0.467857	-0.203877	0	-0.418577	0	0.178225	0	0.0220105	0	-0.532931	0.496193	0.0515662	1.53116	1.12913	0	-0.581393	1.00833	0.346127	0	-0.077606	1.63636	0.676487	1.24261	0.646845	1.09766	-0.199571	0.717853	0.347037	0	-0.17496
348378	FAM159A	family with sequence similarity 159, member A	1.49499	0.533015	0.0309773	-0.396983	0	0.178225	0	0.0220105	0.931041	0.180291	0.0489986	-0.357364	1.37915	0.920918	0.962969	0.350255	1.33871	0.557932	-2.32193	-1.64918	1.46898	0.571098	1.28074	0.681079	1.96016	0.697973	0.14521	0.00532516	0.746453	0.291524
100132916	FAM159B	family with sequence similarity 159, member B	0	-0.539528	0	-0.418577	0	0.178225	0	0.0220105	0	-0.532931	0	-0.40217	0	-0.968223	0	-0.581393	0	-0.300311	0	-0.077606	-0.553899	-0.702608	-1.45623	-1.77616	0	-1.34184	0	-0.0813257	0	-0.17496
221303	FAM162B	family with sequence similarity 162, member B	1.16408	0.295608	1.21577	0.428936	0.558892	0.507862	-0.421697	-0.35107	0.682429	-0.0101575	1.11214	0.614807	0	-0.968223	1.226	0.604734	0.878836	0.263109	-1.24642	-0.921236	-0.0992997	-0.41637	-1.25159	-1.59244	1.63823	0.362963	0.437731	0.179881	1.98495	1.06551
148753	FAM163A	family with sequence similarity 163, member A	1.08294	0.237398	2.5801	1.38001	0.537763	0.495401	-0.844051	-0.724731	0.107997	-0.4502	0.910502	0.430425	0	-0.968223	1.2849	0.661713	2.30303	1.17616	1.31442	0.812047	2.15952	1.00589	0.717944	0.175805	2.03055	0.771223	1.17184	0.617943	2.16729	1.17945
642968	FAM163B	family with sequence similarity 163, member B	1.05889	0.220148	0	-0.418577	0.460243	0.449679	0	0.0220105	0.901576	0.157719	0.980891	0.494792	0	-0.968223	1.2849	0.661713	0.279047	-0.121414	0	-0.077606	0	-0.353846	0.409979	-0.100686	0	-1.34184	0	-0.0813257	0.385823	0.0661543
221061	FAM171A1	family with sequence similarity 171, member A1	2.412	1.1909	0.45208	-0.103432	0.415037	0.423016	-3.09267	-2.71411	1.63425	0.718982	0.676679	0.21661	1.01658	0.424276	0.628031	0.0262114	1.23009	0.488297	-0.998054	-0.753129	-0.837316	-0.881061	-0.990245	-1.3578	1.09766	-0.199571	-0.758244	-0.533791	-1.16985	-0.906038
284069	FAM171A2	family with sequence similarity 171, member A2	1.66392	0.654209	1.24511	0.449388	0.0489435	0.207092	0	0.0220105	1.85476	0.887903	0.396709	-0.0394052	1.66866	1.31748	0.728504	0.123416	2.61496	1.37614	0	-0.077606	0	-0.353846	-0.467725	-0.888686	2.09766	0.841064	1.00961	0.521135	1.71627	0.897595
165215	FAM171B	family with sequence similarity 171, member B	1.5128	0.545794	-2.15446	-1.92045	-3.07942	-1.63804	-0.226578	-0.178445	-0.626549	-1.0129	0.679248	0.218958	1.01658	0.424276	-1.81506	-2.33742	-1.98629	-1.57372	-0.327012	-0.29894	-0.29715	-0.540946	1.31251	0.709602	1.09766	-0.199571	-1.60407	-1.03852	0.939053	0.411886
65990	FAM173A	family with sequence similarity 173, member A	0.467857	-0.203877	2.9899	1.66568	0.631415	0.550637	-0.673734	-0.574049	1.58672	0.682572	1.11261	0.615241	1.01658	0.424276	0.810966	0.203196	1.8725	0.900146	-0.260202	-0.253721	-0.168289	-0.459809	1.71684	1.07261	1.72569	0.45398	1.47727	0.800204	0.484335	0.127718
134145	FAM173B	family with sequence similarity 173, member B	1.4017	0.466082	1.78116	0.823069	1.21305	0.893689	0	0.0220105	1.047	0.269123	1.04999	0.557979	0.79419	0.119646	1.03336	0.418355	1.87002	0.898557	3.16704	2.06598	2.46644	1.19914	1.5746	0.944906	3.28209	2.07362	-0.351986	-0.291365	2.04828	1.10508
345757	FAM174A	family with sequence similarity 174, member A	0.242857	-0.365297	-0.618508	-0.849738	-1.42941	-0.664849	0.387023	0.364414	0.494109	-0.15442	2.54805	1.92786	-0.0664274	-1.05921	0.888969	0.278662	1.16911	0.449203	-1.16829	-0.868352	-1.86225	-1.52641	-1.8843	-2.16048	1.96016	0.697973	0.923989	0.470044	0.195069	-0.0530545
400451	FAM174B	family with sequence similarity 174, member B	0.449478	-0.217062	1.37794	0.54198	0.454617	0.446361	0	0.0220105	1.19825	0.384985	0.289013	-0.137886	1.20923	0.688158	1.4484	0.819893	1.38714	0.58898	0.482544	0.248999	1.67589	0.701376	1.17768	0.588551	2.54512	1.30671	1.33263	0.713888	-1.45442	-1.08388
148109	FAM187B	family with sequence similarity 187, member B	1.5128	0.545794	1.76165	0.809469	-1.90449	-0.945058	1.79754	1.61232	1.30833	0.469312	1.58892	1.05079	1.20923	0.688158	1.64104	1.00627	-0.133737	-0.38605	2.29028	1.47255	2.63202	1.3034	0.886033	0.326716	1.96016	0.697973	1.33263	0.713888	1.97354	1.05837
23359	FAM189A1	family with sequence similarity 189, member A1	0.313823	-0.314384	0.216521	-0.26764	0	0.178225	0	0.0220105	0.766065	0.0539116	0.837076	0.363282	0.139594	-0.777009	1.4484	0.819893	-0.120367	-0.377478	0	-0.077606	-0.166876	-0.45892	1.41677	0.803214	1.09766	-0.199571	0	-0.0813257	1.2564	0.61021
9413	FAM189A2	family with sequence similarity 189, member A2	-1.75362	-1.79762	0.521114	-0.0553089	-2.08825	-1.05344	-0.337679	-0.276738	0.474231	-0.169647	0.396709	-0.0394052	1.01658	0.424276	1.2849	0.661713	0.713119	0.156868	1.49575	0.93478	-0.841253	-0.88354	1.41813	0.80443	1.54512	0.26607	0.264594	0.076565	-2.1182	-1.49869
10712	FAM189B	family with sequence similarity 189, member B	3.10071	1.685	4.37298	2.62982	1.82244	1.25311	1.55531	1.39801	2.67809	1.51862	1.28985	0.777318	0.531156	-0.240654	1.2849	0.661713	1.35105	0.565843	2.90501	1.88862	3.83751	2.06243	2.17487	1.48383	2.80816	1.58043	2.9574	1.68344	4.01559	2.33452
25817	FAM19A5	family with sequence similarity 19 (chemokine (C-C motif)-like), member A5	0.308122	-0.318474	0.965161	0.254235	0.886284	0.70096	-1.98876	-1.73747	0.848981	0.117429	1.11214	0.614807	1.01658	0.424276	0.275634	-0.314723	0.643225	0.112059	-1.76988	-1.27553	-2.83094	-2.13634	1.47328	0.853944	1.09766	-0.199571	1.85778	1.02726	0.111546	-0.105251
221786	FAM200A	family with sequence similarity 200, member A	1.97786	0.879434	0.694093	0.065274	2.10993	1.42267	2.15278	1.9266	3.20496	1.92222	1.677	1.13134	-0.321928	-1.40919	2.79079	2.11862	2.30135	1.17508	1.93932	1.235	0.922957	0.227292	1.84531	1.18795	2.09766	0.841064	2.23295	1.25114	1.10612	0.516294
54757	FAM20A	family with sequence similarity 20, member A	1.70323	0.682413	2.42802	1.27399	0.527081	0.489101	0.82199	0.749235	1.58672	0.682572	1.29027	0.777703	0.503704	-0.278257	1.226	0.604734	2.2118	1.11767	0.468461	0.239467	-0.201696	-0.480844	1.03568	0.461072	2.09766	0.841064	1.34869	0.723477	1.706	0.891181
116151	FAM210B	family with sequence similarity 210, member B	2.39289	1.17719	2.63956	1.42145	3.97105	2.52038	1.38934	1.25118	1.81406	0.856727	1.58892	1.05079	1.20923	0.688158	1.49902	0.868873	2.59329	1.36224	1.34237	0.830966	2.36365	1.13442	1.05901	0.482015	2.22319	0.971696	2.44346	1.37675	1.83977	0.974778
118670	FAM24A	family with sequence similarity 24, member A	-0.293359	-0.749991	0.215236	-0.268536	0	0.178225	-0.867523	-0.745497	-2.32193	-2.31164	0	-0.40217	1.37915	0.920918	-0.341481	-0.911767	0	-0.300311	-0.359864	-0.321176	-0.241008	-0.505597	0	-0.468763	0	-1.34184	0	-0.0813257	0	-0.17496
196792	FAM24B	family with sequence similarity 24, member B	0.847997	0.0688451	1.47964	0.612881	-0.437471	-0.0797988	-0.701955	-0.599017	1.32784	0.484261	0	-0.40217	1.37915	0.920918	-0.180572	-0.756092	1.10183	0.406071	-1.95264	-1.39923	-0.870674	-0.902065	1.24261	0.646845	0.445587	-0.878145	0	-0.0813257	2.09609	1.13496
221301	FAM26D	family with sequence similarity 26, member D	0	-0.539528	0.428023	-0.120203	-1.57474	-0.750568	0	0.0220105	0	-0.532931	0.495464	0.0509001	1.79419	1.48943	0.226004	-0.36274	0.509628	0.0264106	0	-0.077606	0	-0.353846	-1.31958	-1.65348	1.33867	0.0512303	-0.298081	-0.259199	0.779343	0.312078
254228	FAM26E	family with sequence similarity 26, member E	1.07097	0.228809	1.03073	0.299946	1.37832	0.991166	0.566219	0.522951	1.14304	0.342694	0.758499	0.291428	0	-0.968223	0.100473	-0.484188	0.703633	0.150787	1.03411	0.622322	0.923353	0.227542	-1.62483	-1.92753	2.28209	1.03298	0.437731	0.179881	0.956476	0.422775
441168	FAM26F	family with sequence similarity 26, member F	0.864516	0.0806961	1.37908	0.54278	-1.61902	-0.776682	-0.671636	-0.572194	1.14304	0.342694	1.11214	0.614807	1.37915	0.920918	0.962969	0.350255	0.703633	0.150787	-1.03411	-0.777534	-1.44497	-1.26367	-1.46414	-1.78327	2.16179	0.907801	-2.63912	-1.65616	-1.17369	-0.908442
60343	FAM3A	family with sequence similarity 3, member A	1.91896	0.837182	2.06464	1.02068	1.26599	0.924915	0.643029	0.590905	2.59466	1.4547	1.87622	1.31351	1.20923	0.688158	1.2849	0.661713	3.03133	1.64307	1.56042	0.978548	2.85465	1.44358	1.41813	0.80443	1.41504	0.1307	1.69388	0.929461	2.1448	1.1654
54097	FAM3B	family with sequence similarity 3, member B	1.7415	0.709869	1.76239	0.80998	1.05639	0.801291	0.251437	0.244459	-1.62606	-1.77857	0.0480054	-0.358272	1.44718	1.0141	1.88897	1.24614	0.949054	0.308126	-0.653361	-0.519827	-0.63944	-0.756469	-1.77851	-2.06551	0.638232	-0.677672	0	-0.0813257	1.63956	0.84966
131177	FAM3D	family with sequence similarity 3, member D	1.24089	0.350717	1.03317	0.301642	-1.57523	-0.750856	0.673134	0.61754	0.774217	0.0601563	-1.72875	-1.983	1.37915	0.920918	0.962969	0.350255	0.614958	0.0939377	-1.35004	-0.991365	1.60576	0.657221	0.803398	0.252526	0	-1.34184	-0.924336	-0.632902	0.52412	0.152581
79850	FAM57A	family with sequence similarity 57, member A	0.652077	-0.0717127	0.611093	0.00741496	-1.31396	-0.596756	-1.24157	-1.07642	1.27172	0.441265	1.0485	0.556618	1.37915	0.920918	0.962969	0.350255	0.662654	0.124515	-2.62814	-1.85644	0.107203	-0.286346	1.04097	0.465819	2.03055	0.771223	1.76786	0.973602	-0.194692	-0.296629
374986	FAM73A	family with sequence similarity 73, member A	-0.285895	-0.744636	0.877728	0.193286	-2.88222	-1.52173	-0.366582	-0.302309	-2.16766	-2.19346	0	-0.40217	0.420781	-0.391843	1.64104	1.00627	-1.58451	-1.31614	-0.785071	-0.608973	1.06678	0.317848	0.775894	0.227833	1.72569	0.45398	0.923989	0.470044	-1.35118	-1.01936
51439	FAM8A1	family with sequence similarity 8, member A1	2.84356	1.50051	1.87925	0.891447	-2.01432	-1.00983	-0.272722	-0.21927	1.43651	0.567508	-2.7625	-2.9283	0.531156	-0.240654	0.392317	-0.201836	2.0964	1.04369	0.312161	0.133677	1.64067	0.679202	-2.42795	-2.64858	0.445587	-0.878145	3.06617	1.74834	1.44433	0.727652
2191	FAP	fibroblast activation protein, alpha	-1.03891	-1.28487	-2.52671	-2.17994	1.17187	0.8694	1.09543	0.991151	-2.07263	-2.12066	1.44731	0.9213	1.01658	0.424276	0.728504	0.123416	-1.54377	-1.29002	-1.34387	-0.987192	0.788365	0.142547	-1.45255	-1.77286	1.33867	0.0512303	-2.02515	-1.28979	-2.84553	-1.95323
356	FASLG	Fas ligand (TNF superfamily, member 6)	2.59034	1.31884	2.75927	1.5049	0.846666	0.677593	1.50964	1.3576	1.30833	0.469312	1.49619	0.966002	1.37915	0.920918	0.448396	-0.147581	2.51932	1.31482	0.729542	0.416177	1.98168	0.893913	0.304006	-0.195827	2.72569	1.49462	-0.731756	-0.517984	2.02104	1.08806
2195	FAT1	FAT atypical cadherin 1	-5.09174	-4.19247	-3.25173	-2.68535	-4.96813	-2.75201	0	0.0220105	-6.79315	-5.73681	0.910502	0.430425	1.01658	0.424276	-0.36257	-0.93217	-4.01654	-2.87531	-5.97943	-4.12472	-2.78656	-2.1084	1.24184	0.646158	0.485427	-0.836686	-2.41609	-1.52307	-5.44775	-3.57944
2196	FAT2	FAT atypical cadherin 2	-3.34411	-2.93867	-1.59148	-1.528	-4.92321	-2.72552	-2.73421	-2.39698	-3.73979	-3.39779	2.95662	2.30147	0.142801	-0.772617	-2.43025	-2.9326	-2.78942	-2.08861	-4.70173	-3.25993	-1.10052	-1.04679	1.30254	0.700654	0.445587	-0.878145	-2.58612	-1.62453	-3.99564	-2.67197
120114	FAT3	FAT atypical cadherin 3	-2.46118	-2.30524	-1.41825	-1.40724	-4.78673	-2.64502	-1.45762	-1.26756	-3.70358	-3.37005	0.980891	0.494792	0.503704	-0.278257	-1.17792	-1.721	-5.65454	-3.92543	-0.777133	-0.603601	-0.0832141	-0.406242	-0.754653	-1.14629	1.22239	-0.0697737	-4.7252	-2.90098	-4.35592	-2.89712
79633	FAT4	FAT atypical cadherin 4	-3.04264	-2.72239	-4.32527	-3.43371	-6.32389	-3.55165	-2.32193	-2.03223	1.20731	0.391925	0.759106	0.291983	0.209228	-0.681626	-2.4561	-2.95761	-3.43888	-2.50498	-3.36449	-2.35483	0	-0.353846	-1.4863	-1.80316	1.80816	0.539793	-5.29632	-3.24178	-5.59211	-3.66966
10826	FAXDC2	fatty acid hydroxylase domain containing 2	0	-0.539528	0.479913	-0.0840305	0.641354	0.556499	-0.259667	-0.20772	0.686754	-0.00684445	3.40362	2.71022	1.1428	0.597167	0.962969	0.350255	1.15873	0.442551	-2.45917	-1.74207	0.357177	-0.12895	1.24107	0.645471	1.33867	0.0512303	0.816183	0.405713	1.13977	0.537324
83953	FCAMR	Fc receptor, IgA, IgM, high affinity	0	-0.539528	0	-0.418577	-1.15069	-0.500461	0.741127	0.677694	0.354946	-0.261025	0.980891	0.494792	1.19213	0.66474	1.1646	0.545331	-0.355151	-0.527998	0.644816	0.358831	1.95524	0.877271	0	-0.468763	0	-1.34184	-1.85421	-1.18778	-1.39508	-1.04679
2204	FCAR	Fc fragment of IgA, receptor for	1.1753	0.303662	1.1856	0.407906	-2.46243	-1.27413	0.865779	0.787975	-1.48069	-1.66721	0.289013	-0.137886	1.66866	1.31748	-0.556393	-1.11969	0	-0.300311	1.13547	0.690927	1.54987	0.622026	1.24031	0.644783	0.96016	-0.342662	-2.62226	-1.6461	1.36431	0.677641
2205	FCER1A	Fc fragment of IgE, high affinity I, receptor for; alpha polypeptide	2.64386	1.35724	2.83072	1.55471	0.62642	0.547691	0	0.0220105	1.11764	0.323234	0.0499912	-0.356457	0	-0.968223	0.641041	0.0387982	0.179714	-0.185097	-1.42098	-1.03938	1.80661	0.783684	1.0803	0.501129	2.03055	0.771223	-2.38371	-1.50375	-0.523308	-0.501993
2208	FCER2	Fc fragment of IgE, low affinity II, receptor for (CD23)	0	-0.539528	0	-0.418577	0	0.178225	-0.953242	-0.821333	0	-0.532931	0	-0.40217	0.997028	0.39749	1.10047	0.483287	0.0350469	-0.277843	-0.834553	-0.642465	0.611629	0.0312654	0.304006	-0.195827	1.88616	0.620966	-2.32193	-1.46688	0.99613	0.447556
2209	FCGR1A	Fc fragment of IgG, high affinity Ia, receptor (CD64)	2.65593	1.3659	2.94426	1.63386	0.975481	0.753569	0.476977	0.443997	1.79014	0.838404	0.759106	0.291983	1.53116	1.12913	1.2849	0.661713	2.91665	1.56955	0.302572	0.127187	1.08242	0.3277	1.23954	0.644095	2.49621	1.25581	1.86382	1.03087	2.57919	1.43686
2210	FCGR1B	Fc fragment of IgG, high affinity Ib, receptor (CD64)	2.62351	1.34264	0.582625	-0.0124296	0.910457	0.715218	0	0.0220105	1.51342	0.626425	1.0485	0.556618	1.53116	1.12913	1.34148	0.716456	2.87696	1.54411	1.62939	1.02523	2.35184	1.12699	1.23954	0.644095	2.49621	1.25581	1.90909	1.05788	0.257258	-0.0141907
2212	FCGR2A	Fc fragment of IgG, low affinity IIa, receptor (CD32)	1.05404	0.216663	2.95298	1.63994	1.36638	0.984127	-0.450742	-0.376766	1.36578	0.513319	1.17445	0.671786	1.53116	1.12913	1.49902	0.868873	0.252067	-0.138712	0.264054	0.101116	0.0892332	-0.297661	1.03921	0.464238	2.39312	1.14853	-0.633851	-0.459562	2.51627	1.39755
2213	FCGR2B	Fc fragment of IgG, low affinity IIb, receptor (CD32)	3.18922	1.74849	2.8728	1.58405	1.10095	0.827573	-0.566219	-0.47893	1.47423	0.596401	1.34427	0.827079	1.53116	1.12913	0.641041	0.0387982	0.459786	-0.00554273	0.105475	-0.00621648	0.247197	-0.198199	0.965118	0.397718	2.59243	1.35593	1.97024	1.09437	2.20162	1.20091
9103	FCGR2C	Fc fragment of IgG, low affinity IIc, receptor for (CD32) (gene/pseudogene)	3.37596	1.88247	2.84506	1.56471	0.621407	0.544734	0	0.0220105	1.5751	0.673672	0.837651	0.363808	1.90967	1.64761	0.810966	0.203196	2.76006	1.46916	1.48254	0.925839	1.60038	0.653828	0.965118	0.397718	2.39312	1.14853	1.12313	0.588875	2.20162	1.20091
2214	FCGR3A	Fc fragment of IgG, low affinity IIIa, receptor (CD16a)	3.31636	1.83971	3.00406	1.67555	1.04146	0.792483	-1	-0.862701	1.5751	0.673672	0.837651	0.363808	0.209228	-0.681626	1.49902	0.868873	-0.651904	-0.718246	-1.4027	-1.02701	-0.0769891	-0.402322	-0.938029	-1.31092	2.76751	1.53814	-1.12394	-0.752012	2.51627	1.39755
2215	FCGR3B	Fc fragment of IgG, low affinity IIIb, receptor (CD16b)	3.27521	1.81019	2.85436	1.5712	-1.96758	-0.982265	0	0.0220105	1.52555	0.635712	0	-0.40217	0.209228	-0.681626	1.10047	0.483287	0.459786	-0.00554273	1.48254	0.925839	1.51083	0.597446	1.17687	0.587833	2.09766	0.841064	1.58027	0.861662	1.59953	0.82464
2217	FCGRT	Fc fragment of IgG, receptor, transporter, alpha	1.08294	0.237398	1.36434	0.532501	0.558892	0.507862	-0.230846	-0.182221	1.37652	0.521553	-0.100264	-0.493855	1.37915	0.920918	-0.131245	-0.708368	0.509628	0.0264106	-0.962032	-0.728748	-1.13987	-1.07156	1.41813	0.80443	0.96016	-0.342662	0.351744	0.128569	1.3943	0.696383
115350	FCRL1	Fc receptor-like 1	1.81513	0.762688	2.68774	1.45504	0.850955	0.680123	0.0493207	0.0656451	0.817773	0.0935226	0	-0.40217	1.01658	0.424276	0	-0.581393	2.62909	1.38519	-0.917115	-0.698346	1.68346	0.706142	0.0141789	-0.456034	1.72569	0.45398	-1.3461	-0.884581	-0.579598	-0.53717
79368	FCRL2	Fc receptor-like 2	1.75653	0.720651	2.78834	1.52517	0.983316	0.758191	-0.281078	-0.226662	-1.07929	-1.35972	0	-0.40217	1.20923	0.688158	0	-0.581393	0.65914	0.122263	-1.68349	-1.21706	2.52721	1.23741	-0.0232698	-0.489655	1.80816	0.539793	-1.44996	-0.946557	1.92442	1.02768
115352	FCRL3	Fc receptor-like 3	1.82229	0.767824	2.75894	1.50467	-2.35029	-1.20799	1.10579	1.00032	1.24264	0.418988	1.049	0.557072	1.20923	0.688158	0	-0.581393	-1.10812	-1.01072	2.15155	1.37865	2.6581	1.31982	0.781165	0.232565	1.96016	0.697973	-2.21251	-1.40159	-0.0874571	-0.229615
83417	FCRL4	Fc receptor-like 4	2.18088	1.02509	0.468771	-0.0917974	-2.64075	-1.3793	0.702042	0.643115	-2.27614	-2.27656	0	-0.40217	0.209228	-0.681626	1.2849	0.661713	-1.51444	-1.27122	2.04208	1.30456	2.2203	1.04416	-0.286304	-0.725807	2.09766	0.841064	1.02968	0.533113	-0.114935	-0.246787
83416	FCRL5	Fc receptor-like 5	1.64789	0.642709	2.90049	1.60335	-2.35029	-1.20799	0.448607	0.418898	-0.405545	-0.843598	0.677322	0.217197	0.531156	-0.240654	-2.34978	-2.85474	0.587448	0.0763009	1.44355	0.899444	2.81397	1.41797	-0.401781	-0.829482	2.09766	0.841064	-2.78376	-1.74247	2.27028	1.24382
343413	FCRL6	Fc receptor-like 6	2.81153	1.47753	2.90009	1.60307	-2.17078	-1.10211	0	0.0220105	0.973715	0.212981	1.44731	0.9213	1.20923	0.688158	0.547932	-0.0512828	0.392634	-0.0485938	-1.00288	-0.756397	1.51083	0.597446	0.887012	0.327595	2.49621	1.25581	-1.83679	-1.17739	2.6888	1.50536
84824	FCRLA	Fc receptor-like A	3.08592	1.67438	2.88194	1.59042	0.621407	0.544734	-1.20822	-1.04692	0.905292	0.160566	0.175357	-0.241818	0	-0.968223	0.448396	-0.147581	2.82408	1.5102	1.78399	1.12987	2.30693	1.09871	0.623587	0.0910913	1.80816	0.539793	-1.3096	-0.862798	-0.919879	-0.749823
90342	FER1L5	fer-1-like family member 5	1.42146	0.480264	-1.79538	-1.67013	0	0.178225	0	0.0220105	1.80016	0.846076	0	-0.40217	0	-0.968223	1.4484	0.819893	1.08366	0.394423	0.375629	0.176635	0.0581842	-0.317211	1.17447	0.585674	0.808157	-0.500842	-2.82346	-1.76616	-1.13598	-0.884874
654463	FER1L6	fer-1-like family member 6	-0.638216	-0.997399	3.26889	1.86016	-0.564255	-0.154577	-3.32193	-2.91694	0.64202	-0.041113	0	-0.40217	0	-0.968223	0.0195528	-0.562476	-2.12007	-1.65949	-0.675251	-0.534643	4.13886	2.25218	2.32186	1.61579	1.80816	0.539793	-3.55313	-2.20158	-1.28973	-0.980955
2864	FFAR1	free fatty acid receptor 1	1.57347	0.589315	1.29923	0.487116	0.465847	0.452984	0.613354	0.564651	0.651786	-0.0336314	0.759106	0.291983	1.20923	0.688158	1.59524	0.961959	2.40052	1.23866	1.70418	1.07585	2.71686	1.35682	1.71739	1.07311	1.80816	0.539793	0.669509	0.318189	2.51627	1.39755
2867	FFAR2	free fatty acid receptor 2	1.70323	0.682413	1.7216	0.781546	0.859495	0.68516	0.484311	0.450486	-1.0136	-1.3094	0.174447	-0.24265	1.20923	0.688158	1.2849	0.661713	2.48076	1.2901	0.431815	0.214664	2.62784	1.30077	1.24031	0.644783	2.28209	1.03298	0	-0.0813257	1.92442	1.02768
2865	FFAR3	free fatty acid receptor 3	1.2726	0.373466	1.12559	0.366071	-1.4857	-0.698052	0	0.0220105	1.18608	0.375664	0	-0.40217	1.90967	1.64761	-1.34375	-1.88143	1.97914	0.968514	1.99712	1.27412	2.2478	1.06148	1.41745	0.803822	2.28209	1.03298	-1.58974	-1.02997	1.92442	1.02768
338557	FFAR4	free fatty acid receptor 4	0	-0.539528	1.06535	0.324077	0.714657	0.599734	1.85496	1.66311	0	-0.532931	1.23243	0.724808	1.20923	0.688158	1.03336	0.418355	0	-0.300311	1.03436	0.622492	0.908411	0.218134	-0.155526	-0.608394	0.223194	-1.10957	0.0622371	-0.0441871	1.20891	0.580527
2251	FGF6	fibroblast growth factor 6	-2.69969	-2.47635	0	-0.418577	-1.5736	-0.749894	-0.0266964	-0.00160812	1.5061	0.620815	0.0480054	-0.358272	0	-0.968223	2.36896	1.71052	-2.48092	-1.89082	0.421809	0.207891	1.57714	0.639199	0	-0.468763	1.44559	0.16249	-2.05733	-1.30899	-2.13813	-1.51115
2260	FGFR1	fibroblast growth factor receptor 1	-1.07998	-1.31433	3.03267	1.69549	-0.552248	-0.147495	0.214219	0.211532	2.84016	1.64276	-1.86233	-2.10515	1.65625	1.30048	0.810966	0.203196	2.12198	1.06009	3.69518	2.42344	1.17798	0.387868	-0.190103	-0.639437	2.22319	0.971696	-1.4747	-0.961317	2.43084	1.34415
2263	FGFR2	fibroblast growth factor receptor 2	1.95346	0.861929	1.36782	0.534926	-4.10546	-2.2432	-3.46336	-3.04206	1.77218	0.824647	0.910502	0.430425	1.20923	0.688158	-1.60171e-16	-0.581393	0.395998	-0.0464377	-1.36296	-1.00011	0.583329	0.0134461	1.30327	0.701312	0.445587	-0.878145	-1.49179	-0.971517	-0.752873	-0.645455
2261	FGFR3	fibroblast growth factor receptor 3	1.98425	0.884024	0.965288	0.254324	0.784415	0.640877	0.898687	0.817089	0.92739	0.177494	-2.50027	-2.6885	1.90967	1.64761	1.54793	0.916192	1.82719	0.871101	0	-0.077606	2.58006	1.27069	1.76077	1.11205	1.80816	0.539793	1.50895	0.819107	1.65375	0.858524
53834	FGFRL1	fibroblast growth factor receptor-like 1	0.778786	0.0191914	0.568488	-0.0222848	0.636393	0.553573	0.354778	0.335887	0	-0.532931	0.910502	0.430425	1.37915	0.920918	1.2849	0.661713	1.21348	0.477646	1.03411	0.622322	1.48304	0.579948	1.80444	1.15125	1.88616	0.620966	0.631641	0.295592	2.17475	1.18412
84929	FIBCD1	fibrinogen C domain containing 1	-1.57371	-1.66855	1.38052	0.543779	1.42275	1.01737	0.701955	0.643038	-0.654739	-1.03449	1.04801	0.556163	0.531156	-0.240654	0.448396	-0.147581	1.29176	0.527837	0.068649	-0.0311415	0.781736	0.138373	0.800284	0.24973	1.44559	0.16249	0	-0.0813257	0.0617116	-0.136394
11153	FICD	FIC domain containing	1.36375	0.438857	1.03256	0.301218	1.27878	0.932459	-1.07692	-0.930753	1.48917	0.607841	1.63297	1.09107	0.79419	0.119646	0.387023	-0.206958	1.35395	0.567702	0.102761	-0.00805337	0.720346	0.0997189	1.47002	0.851014	1.33867	0.0512303	1.10432	0.577652	-1.39247	-1.04516
51303	FKBP11	FK506 binding protein 11, 19 kDa	0	-0.539528	1.09683	0.346023	-1.49213	-0.701844	1.15278	1.04189	1.53996	0.646754	-1.30079	-1.59166	1.01658	0.424276	1.1646	0.545331	1.6048	0.728526	-0.285672	-0.27096	-0.488106	-0.661181	0.805471	0.254387	1.22319	-0.0689394	1.93957	1.07607	1.02384	0.464875
79147	FKRP	fukutin related protein	2.46786	1.23097	1.31072	0.495124	1.22632	0.901514	0.132689	0.139402	1.48917	0.607841	1.17354	0.670953	1.01658	0.424276	-1.51937	-2.05135	1.99269	0.977201	1.0162	0.610196	-0.916535	-0.930941	-0.6177	-1.02333	0.445587	-0.878145	1.42697	0.770187	0.790574	0.319097
23769	FLRT1	fibronectin leucine rich transmembrane protein 1	-0.626471	-0.988973	1.30095	0.488313	0.93086	0.727252	1.01641	0.921237	1.46419	0.588708	0	-0.40217	1.65625	1.30048	1.10047	0.483287	1.02366	0.355954	1.43146	0.891266	1.73637	0.739454	1.30254	0.700654	1.44559	0.16249	0.49847	0.216125	0.196799	-0.0519733
23768	FLRT2	fibronectin leucine rich transmembrane protein 2	-3.66922	-3.17192	0.78261	0.12698	-3.30612	-1.77174	-1.07692	-0.930753	-0.176408	-0.668068	-1.49076	-1.76538	1.20923	0.688158	-1.67054	-2.1976	-0.609719	-0.691202	1.76375	1.11617	0.889514	0.206235	0.886033	0.326716	1.96016	0.697973	-3.4685	-2.15108	1.22337	0.589567
23767	FLRT3	fibronectin leucine rich transmembrane protein 3	1.8007	0.752337	0.278983	-0.224098	-0.089312	0.125548	-0.469485	-0.393348	1.99828	0.997848	0	-0.40217	0.209228	-0.681626	0.547932	-0.0512828	1.50417	0.664013	-0.230974	-0.233938	1.42953	0.546252	1.47197	0.852773	1.22319	-0.0689394	1.36334	0.732218	2.15238	1.17014
2322	FLT3	fms-related tyrosine kinase 3	-1.27392	-1.45347	-1.64247	-1.56354	-0.641069	-0.199882	1.24157	1.12044	0.766065	0.0539116	-1.81201	-2.05914	1.20923	0.688158	0.448396	-0.147581	-2.20047	-1.71103	2.40452	1.54987	1.99291	0.90099	1.24031	0.644783	0.96016	-0.342662	-3.32193	-2.06361	-2.79462	-1.92141
2323	FLT3LG	fms-related tyrosine kinase 3 ligand	1.49499	0.533015	1.70157	0.767582	0.793357	0.646151	0.905387	0.823017	1.31951	0.477879	1.23243	0.724808	0.209228	-0.681626	0.0931094	-0.491312	0.703633	0.150787	-0.613316	-0.492723	-0.991143	-0.977918	1.47263	0.853358	1.63823	0.362963	-2.10769	-1.33904	1.90677	1.01664
2324	FLT4	fms-related tyrosine kinase 4	-3.0939	-2.75917	1.54966	0.661686	-2.7516	-1.44468	-1.35958	-1.18083	0.770147	0.0570384	3.37855	2.6873	1.37915	0.920918	-1.64514	-2.17302	-2.4844	-1.89306	-2.78078	-1.95975	1.45959	0.565184	1.36149	0.753581	0.808157	-0.500842	-2.80189	-1.75329	1.02384	0.464875
28982	FLVCR1	feline leukemia virus subgroup C cellular receptor 1	0.141356	-0.438116	1.47094	0.60681	1.81807	1.25053	1.09543	0.991151	2.53877	1.41189	0.676679	0.21661	0.174831	-0.728742	1.226	0.604734	3.3037	1.81769	1.93368	1.23119	1.29839	0.463686	1.04097	0.465819	1.88616	0.620966	0.225705	0.0533589	2.79871	1.57405
55640	FLVCR2	feline leukemia virus subgroup C cellular receptor family, member 2	1.77879	0.736615	1.48036	0.613379	-1.87529	-0.927832	-0.757201	-0.647894	1.72064	0.785163	-1.95589	-2.19071	1.53116	1.12913	0.547932	-0.0512828	1.50963	0.667509	1.18829	0.726673	0.0245002	-0.33842	1.24184	0.646158	0.445587	-0.878145	0.477275	0.203477	0	-0.17496
64778	FNDC3B	fibronectin type III domain containing 3B	2.4402	1.21113	2.73177	1.48574	-0.947427	-0.380574	-1.54967	-1.349	1.83376	0.871816	1.8388	1.27929	1.66866	1.31748	1.81097	1.17067	0.490953	0.0144379	0.538305	0.28674	4.40828	2.42182	2.26763	1.56711	1.80816	0.539793	-2.60407	-1.63525	0.834853	0.346768
64838	FNDC4	fibronectin type III domain containing 4	1.26211	0.365938	0.999005	0.277828	1.27878	0.932459	-0.76601	-0.655687	-0.940059	-1.25306	1.04801	0.556163	0.209228	-0.681626	0.962969	0.350255	0.151773	-0.203009	1.67636	1.05702	2.11571	0.978305	1.5752	0.945451	0.638232	-0.677672	1.61233	0.880794	1.99613	1.07249
252995	FNDC5	fibronectin type III domain containing 5	2.10659	0.97179	1.09648	0.34578	0	0.178225	0.677592	0.621484	0	-0.532931	0.588574	0.136043	0.531156	-0.240654	1.2849	0.661713	-1.62784	-1.34392	1.8365	1.16541	2.59297	1.27881	0.299601	-0.199782	1.88616	0.620966	0.14521	0.00532516	-2.13737	-1.51068
408263	FNDC9	fibronectin type III domain containing 9	0.733932	-0.0129881	0.53056	-0.048724	-1.5995	-0.765173	1.2581	1.13506	-1.24286	-1.48502	3.45417	2.75644	0.405835	-0.412317	1.1646	0.545331	-1.61644	-1.33661	-1.08568	-0.812439	0.0607361	-0.315604	0.886033	0.326716	1.63823	0.362963	0	-0.0813257	-1.65206	-1.20739
2346	FOLH1	folate hydrolase (prostate-specific membrane antigen) 1	0.822287	0.0504005	1.09625	0.345618	-2.34672	-1.20588	-1.60469	-1.39768	-0.746827	-1.10504	0.676037	0.216022	1.79419	1.48943	1.64104	1.00627	-2.9044	-2.16232	-1.30993	-0.964221	0.984034	0.26575	1.41948	0.805646	1.09766	-0.199571	-2.92712	-1.82802	0.8115	0.332174
2348	FOLR1	folate receptor 1 (adult)	1.30363	0.395725	2.15647	1.08469	-1.48145	-0.695545	0.293497	0.28167	0.237021	-0.351361	1.67604	1.13046	1.5175	1.11042	-1.59342	-2.12299	1.26944	0.513522	1.77391	1.12304	1.08229	0.327615	1.47197	0.852773	1.54512	0.26607	-2.11104	-1.34104	0.927425	0.40462
2357	FPR1	formyl peptide receptor 1	1.88518	0.812942	0.734587	0.0935024	0.793357	0.646151	-1.04593	-0.903333	1.13989	0.34028	1.11214	0.614807	1.37915	0.920918	0.192645	-0.395014	0.515061	0.0298937	-1.66904	-1.20728	-1.34242	-1.1991	0.804435	0.253457	0.808157	-0.500842	-2.64184	-1.65778	1.17475	0.559184
2358	FPR2	formyl peptide receptor 2	1.71097	0.687963	1.61626	0.708119	0.994991	0.765076	1.48176	1.33294	0.376525	-0.244495	0	-0.40217	1.66866	1.31748	-0.392317	-0.96095	-3.33587	-2.43893	1.27607	0.786088	1.56662	0.632573	1.24107	0.645471	1.22319	-0.0689394	-2.14658	-1.36225	1.55099	0.794309
2359	FPR3	formyl peptide receptor 3	1.4402	0.493706	1.18593	0.408135	-1.37184	-0.630894	-0.367318	-0.30296	1.32507	0.482138	0.980891	0.494792	1.20923	0.688158	-0.584963	-1.14733	0.878836	0.263109	-1.18442	-0.879272	-1.43629	-1.25821	1.10968	0.527509	1.63823	0.362963	0.351744	0.128569	2.01837	1.08639
80144	FRAS1	Fraser extracellular matrix complex subunit 1	-2.26708	-2.16599	-2.05566	-1.85157	-4.00415	-2.18345	-1.42162	-1.23571	-1.28537	-1.51759	0.0489986	-0.357364	0.531156	-0.240654	-2.43025	-2.9326	-2.16088	-1.68565	-2.1492	-1.53227	-1.32813	-1.1901	1.30181	0.699995	1.09766	-0.199571	-3.41898	-2.12152	-2.41545	-1.68446
341640	FREM2	FRAS1 related extracellular matrix protein 2	-3.25129	-2.87208	-2.57849	-2.21603	-2.7789	-1.46079	0	0.0220105	-1.86949	-1.96505	0.589257	0.136667	0.209228	-0.681626	1.10047	0.483287	-3.34295	-2.44347	0	-0.077606	0	-0.353846	-2.15332	-2.40201	1.44559	0.16249	-4.26901	-2.62876	-2.25753	-1.58577
391059	FRRS1	ferric-chelate reductase 1	1.89879	0.822706	0.782466	0.126879	0.471429	0.456276	-0.953242	-0.821333	1.07578	0.291166	1.23243	0.724808	0.503704	-0.278257	1.2849	0.661713	1.61496	0.735036	-2.79135	-1.9669	0.628307	0.0417666	1.10885	0.526756	1.96016	0.697973	1.10432	0.577652	-1.13448	-0.883933
23732	FRRS1L	ferric-chelate reductase 1-like	0.918963	0.119758	0.999254	0.278001	-1.85974	-0.918659	1.135	1.02616	-0.906107	-1.22705	0	-0.40217	1.01658	0.424276	1.49902	0.868873	-2.1979	-1.70938	1.53446	0.960979	1.06265	0.315252	1.76024	1.11157	1.63823	0.362963	0.592752	0.272386	0.577377	0.185863
2492	FSHR	follicle stimulating hormone receptor	-1.89107	-1.89622	-2.51037	-2.16855	-1.94764	-0.970507	0.325211	0.309728	1.5844	0.680797	0.395929	-0.0401189	1.53116	1.12913	0.728504	0.123416	-3.41254	-2.48808	-1.38541	-1.0153	1.11303	0.346972	1.62476	0.989944	0.808157	-0.500842	-0.947078	-0.646473	-3.94939	-2.64307
53940	FTHL17	ferritin, heavy polypeptide-like 17	1.18644	0.311655	0.415037	-0.129255	0.372364	0.397847	-0.251105	-0.200145	-0.448713	-0.876667	0.0489986	-0.357364	0.174831	-0.728742	0.100473	-0.484188	0	-0.300311	-0.840988	-0.64682	-0.0276238	-0.371239	0	-0.468763	2.44559	1.20313	-2.36082	-1.49009	-1.27466	-0.971537
5045	FURIN	furin (paired basic amino acid cleaving enzyme)	0.93226	0.129298	2.01502	0.986089	-2.10287	-1.06206	1.37426	1.23783	1.26595	0.436845	0.0480054	-0.358272	1.53116	1.12913	1.03336	0.418355	-0.870829	-0.858598	0.10601	-0.00585421	1.54826	0.621013	0.888969	0.329351	2.28209	1.03298	1.74471	0.95979	-1.38908	-1.04305
2523	FUT1	fucosyltransferase 1 (galactoside 2-alpha-L-fucosyltransferase, H blood group)	-1.47837	-1.60015	1.03135	0.300377	0.471429	0.456276	1.0357	0.93831	1.26883	0.439057	0.289013	-0.137886	0	-0.968223	0.836501	0.227901	-0.782703	-0.802101	0.230974	0.0787263	-1.00279	-0.98525	0.804435	0.253457	0.223194	-1.10957	1.41587	0.763565	1.65737	0.860786
486	FXYD2	FXYD domain containing ion transport regulator 2	0	-0.539528	0.74366	0.0998276	0.158089	0.271466	0.409526	0.384323	0	-0.532931	0.396709	-0.0394052	1.75979	1.44231	2.06731	1.41867	0.137754	-0.211997	1.24642	0.766024	1.72362	0.731427	0.0409718	-0.431979	0.906891	-0.398096	-0.450084	-0.349903	1.05103	0.481868
5349	FXYD3	FXYD domain containing ion transport regulator 3	2.08889	0.95909	1.11351	0.357652	0.918653	0.720052	1.15278	1.04189	1.7143	0.780305	0.496193	0.0515662	1.01658	0.424276	0.962969	0.350255	2.12182	1.05998	-0.299056	-0.280019	1.77736	0.765267	1.47197	0.852773	2.09766	0.841064	2.05058	1.14231	1.66079	0.862924
53827	FXYD5	FXYD domain containing ion transport regulator 5	2.13562	0.992616	-0.598138	-0.835538	0.784415	0.640877	1.07692	0.974775	1.18608	0.375664	1.34387	0.826709	0.79419	0.119646	0.888969	0.278662	2.28236	1.1629	2.08845	1.33594	2.62747	1.30054	1.47197	0.852773	2.54512	1.30671	1.1932	0.630687	2.09861	1.13653
53826	FXYD6	FXYD domain containing ion transport regulator 6	1.15276	0.28749	1.32485	0.504973	-1.09538	-0.467837	-0.865779	-0.743954	0.856679	0.123326	1.23287	0.725208	1.15732	0.617055	2.06731	1.41867	1.45393	0.631802	-0.558785	-0.455814	1.02791	0.293374	0.419483	-0.0921521	-0.415037	-1.77374	0.442228	0.182564	2.03208	1.09496
100533181	FXYD6-FXYD2	FXYD6-FXYD2 readthrough	NA	NA	0	-0.418577	-2.32193	-1.19126	0	0.0220105	NA	NA	NA	NA	NA	NA	0.100473	-0.484188	NA	NA	NA	NA	NA	NA	NA	NA	NA	NA	-0.450084	-0.349903	NA	NA
53822	FXYD7	FXYD domain containing ion transport regulator 7	1.93886	0.851459	1.72152	0.781494	0.922734	0.722459	2.05646	1.84138	1.7143	0.780305	0.759106	0.291983	1.20923	0.688158	2.31347	1.65683	2.5581	1.33968	1.78677	1.13175	2.97212	1.51754	1.30181	0.699995	2.03055	0.771223	1.03884	0.538576	2.3729	1.30795
8321	FZD1	frizzled class receptor 1	1.00957	0.184759	1.12741	0.367341	-0.975976	-0.397412	2.2279	1.99306	2.36037	1.27523	1.06556	0.572212	0.209228	-0.681626	2.57178	1.90674	1.90198	0.919048	2.25322	1.44747	1.74832	0.746984	1.41542	0.801996	1.44559	0.16249	1.8246	1.00746	1.19927	0.574503
11211	FZD10	frizzled class receptor 10	1.8365	0.778022	0.965543	0.254502	1.46585	1.04279	1.09795	0.99338	1.43908	0.569474	0.395929	-0.0401189	1.20923	0.688158	0.100473	-0.484188	1.16566	0.446991	-0.230974	-0.233938	-1.17618	-1.09442	1.24184	0.646158	1.54512	0.26607	0	-0.0813257	0.539479	0.162179
2535	FZD2	frizzled class receptor 2	0	-0.539528	1.00017	0.278638	0.859495	0.68516	0.304967	0.291818	1.63872	0.722407	0.589257	0.136667	0.79419	0.119646	0	-0.581393	-0.56097	-0.659948	0.763536	0.439186	-2.09052	-1.67014	-1.85502	-2.1342	1.44559	0.16249	-2.8826	-1.80145	2.03208	1.09496
7976	FZD3	frizzled class receptor 3	-0.691878	-1.0359	-2.63082	-2.25252	-2.57209	-1.33881	-1.18771	-1.02877	1.23303	0.41163	0.101042	-0.309774	1.53116	1.12913	1.49902	0.868873	0.0188669	-0.288216	-2.08524	-1.48898	-3.17722	-2.35438	-1.82719	-2.10921	1.22319	-0.0689394	-1.17759	-0.784029	-1.64376	-1.2022
8322	FZD4	frizzled class receptor 4	1.30363	0.395725	1.0315	0.300478	-1.20265	-0.531107	0.346787	0.328817	1.42102	0.55564	0.911594	0.431424	0.77135	0.0883605	0.810966	0.203196	1.12715	0.422303	0.921001	0.545765	2.48877	1.21321	1.30181	0.699995	0	-1.34184	0.619489	0.28834	1.23285	0.59549
7855	FZD5	frizzled class receptor 5	0.850576	0.0706958	-1.27688	-1.30869	0.278784	0.342653	-0.612571	-0.519938	0.848981	0.117429	1.79921	1.24309	0.79419	0.119646	1.03336	0.418355	2.05956	1.02007	-0.551996	-0.451219	0.696815	0.0849022	0.888969	0.329351	0.808157	-0.500842	-1.0373	-0.70031	1.97079	1.05665
8323	FZD6	frizzled class receptor 6	3.53912	1.99952	3.78477	2.21978	0.632612	0.551343	1.05973	0.959563	0.785752	0.0689926	1.54418	1.00988	1.01658	0.424276	-0.123777	-0.701143	3.30527	1.81869	-0.729981	-0.571686	2.83134	1.4289	2.21433	1.51925	2.72569	1.49462	2.52644	1.42627	2.65556	1.48459
8324	FZD7	frizzled class receptor 7	0.93226	0.129298	-1.68412	-1.59257	1.22632	0.901514	-2.96719	-2.6031	2.06751	1.05088	0.293211	-0.134048	1.37915	0.920918	0.547932	-0.0512828	-0.793193	-0.808826	0.999424	0.598844	0.826398	0.166494	0.419483	-0.0921521	1.63823	0.362963	1.53617	0.835348	1.38582	0.691088
8325	FZD8	frizzled class receptor 8	1.69546	0.676834	1.18713	0.408973	0.793357	0.646151	-2.44773	-2.14353	1.47923	0.600228	0	-0.40217	0.531156	-0.240654	-2.12378	-2.63609	1.90406	0.920377	1.0162	0.610196	1.18559	0.392658	1.6721	1.03245	1.63823	0.362963	0.397592	0.155928	0.855283	0.359536
8326	FZD9	frizzled class receptor 9	0	-0.539528	2.08071	1.03188	0.631415	0.550637	-3.16051	-2.77413	1.37116	0.517443	0.292372	-0.134814	0.503704	-0.278257	0.888969	0.278662	1.8359	0.876685	1.61877	1.01804	1.94122	0.868442	1.96465	1.2951	1.88616	0.620966	1.68467	0.923961	1.8115	0.957109
2550	GABBR1	gamma-aminobutyric acid (GABA) B receptor, 1	1.08294	0.237398	-0.796852	-0.974061	-2.62422	-1.36956	1.18771	1.07279	1.77015	0.823086	0.980891	0.494792	1.53116	1.12913	1.10047	0.483287	1.90198	0.919048	0	-0.077606	-0.181176	-0.467923	0.304006	-0.195827	1.09766	-0.199571	2.89274	1.64485	1.75643	0.922696
9568	GABBR2	gamma-aminobutyric acid (GABA) B receptor, 2	1.15276	0.28749	1.84004	0.864109	-3.38238	-1.81672	0.839921	0.765098	-2.97243	-2.80995	0	-0.40217	0	-0.968223	1.2849	0.661713	0.874615	0.260404	0.260202	0.0985092	0.536136	-0.0162687	0.61888	0.0868654	1.72569	0.45398	-2.36082	-1.49009	-1.76155	-1.27581
2554	GABRA1	gamma-aminobutyric acid (GABA) A receptor, alpha 1	0	-0.539528	0	-0.418577	-2.41718	-1.24744	-1.83708	-1.60328	-1.49263	-1.67635	0.937422	0.455042	1.90967	1.64761	1.4484	0.819893	-3.12558	-2.30411	-1.07321	-0.803994	0.368586	-0.121767	0	-0.468763	0.445587	-0.878145	-2.74849	-1.72142	-3.88321	-2.60171
2555	GABRA2	gamma-aminobutyric acid (GABA) A receptor, alpha 2	0	-0.539528	0.702254	0.0709634	-2.41586	-1.24666	1.17035	1.05743	0.00175619	-0.531586	0.396709	-0.0394052	0	-0.968223	1.68544	1.04922	-3.663	-2.64866	0.319795	0.138844	0.22472	-0.212352	0.624761	0.0921456	1.33867	0.0512303	-3.53204	-2.18899	-2.72536	-1.87813
2556	GABRA3	gamma-aminobutyric acid (GABA) A receptor, alpha 3	-0.909077	-1.19172	1.15725	0.388139	-2.15817	-1.09468	1.82199	1.63395	-0.799955	-1.14573	0.49983	0.0548918	0	-0.968223	1.81097	1.17067	2.59329	1.36224	1.13176	0.688413	1.53073	0.609978	-2.9369	-3.1055	1.51457	0.23428	-0.628045	-0.456097	-0.37411	-0.408754
2557	GABRA4	gamma-aminobutyric acid (GABA) A receptor, alpha 4	0	-0.539528	0.380326	-0.153452	-2.85422	-1.50521	1.49577	1.34533	0.265947	-0.329203	0.0489986	-0.357364	0.79419	0.119646	-0.901384	-1.45346	0.137754	-0.211997	1.21536	0.744995	-1.94565	-1.57892	0.965118	0.397718	0	-1.34184	-3.32193	-2.06361	0.279579	-0.000241236
2558	GABRA5	gamma-aminobutyric acid (GABA) A receptor, alpha 5	0.0709665	-0.488615	0.783189	0.127383	-3.42525	-1.84201	1.43629	1.29271	-2.56406	-2.49713	0.588574	0.136043	0.174831	-0.728742	0.962969	0.350255	-3.23216	-2.37245	-0.286489	-0.271513	-0.485427	-0.659494	1.17527	0.586394	1.09766	-0.199571	0	-0.0813257	0.842956	0.351832
2559	GABRA6	gamma-aminobutyric acid (GABA) A receptor, alpha 6	-2.42429	-2.27877	0.617319	0.0117551	-3.41718	-1.83725	0.865779	0.787975	1.54474	0.65041	3.09047	2.42387	0	-0.968223	0	-0.581393	-2.61363	-1.97591	-1.19767	-0.888238	0.364897	-0.124089	0	-0.468763	1.09766	-0.199571	0	-0.0813257	0.8115	0.332174
2560	GABRB1	gamma-aminobutyric acid (GABA) A receptor, beta 1	-0.963967	-1.2311	0.743066	0.0994132	-2.94956	-1.56145	-2.65928	-2.33068	0.133568	-0.430612	0	-0.40217	1.20923	0.688158	1.226	0.604734	-2.95246	-2.19313	0.975456	0.582622	1.8825	0.831469	0.965118	0.397718	1.09766	-0.199571	-4.32193	-2.66034	-3.08195	-2.10098
2561	GABRB2	gamma-aminobutyric acid (GABA) A receptor, beta 2	-1.57371	-1.66855	1.21706	0.429831	-1.40686	-0.65155	0.836249	0.76185	0.686754	-0.00684445	3.1063	2.43834	0.209228	-0.681626	1.34148	0.716456	1.01601	0.351053	1.8365	1.16541	1.09164	0.333503	0.29813	-0.201103	1.88616	0.620966	-3.94578	-2.43588	0.11422	-0.10358
2562	GABRB3	gamma-aminobutyric acid (GABA) A receptor, beta 3	-1.88517	-1.892	1.15803	0.388683	-1.94141	-0.96683	-1.27016	-1.10171	1.72275	0.786777	1.71786	1.1687	0.174831	-0.728742	0.641041	0.0387982	-2.58127	-1.95516	-2.26446	-1.61028	0.778704	0.136464	1.36008	0.752316	1.33867	0.0512303	-2.71879	-1.7037	1.30239	0.638947
2563	GABRD	gamma-aminobutyric acid (GABA) A receptor, delta	1.12986	0.271061	1.43098	0.578956	-0.0187621	0.167159	1.27737	1.15212	1.26015	0.432408	0.676037	0.216022	1.37915	0.920918	1.4484	0.819893	-0.80224	-0.814626	1.15198	0.702097	1.78084	0.767458	1.36149	0.753581	1.63823	0.362963	-0.98731	-0.670481	-0.577377	-0.535782
2564	GABRE	gamma-aminobutyric acid (GABA) A receptor, epsilon	1.09481	0.245917	1.76261	0.810134	1.10455	0.829694	1.58181	1.42146	2.18761	1.14288	1.17627	0.67345	0.79419	0.119646	1.68544	1.04922	2.44115	1.2647	0.834885	0.487478	2.20354	1.03361	1.17447	0.585674	1.19265	-0.10073	-1.28309	-0.846982	2.37082	1.30665
2565	GABRG1	gamma-aminobutyric acid (GABA) A receptor, gamma 1	-2.35686	-2.2304	0.660726	0.0420143	-3.38312	-1.81716	1.30944	1.18049	-2.10445	-2.14504	1.17399	0.67137	-2.39555	-4.24961	0.448396	-0.147581	-4.64386	-3.27748	-1.62408	-1.17685	1.48499	0.581177	0	-0.468763	0	-1.34184	-3.90689	-2.41267	1.27958	0.624693
2566	GABRG2	gamma-aminobutyric acid (GABA) A receptor, gamma 2	-1.95643	-1.94312	0	-0.418577	-2.36959	-1.21938	1.0357	0.93831	-1.69473	-1.83118	0.597996	0.144659	0	-0.968223	1.226	0.604734	-3.1595	-2.32586	-0.17521	-0.196195	1.84635	0.808707	0	-0.468763	0.808157	-0.500842	-3.96665	-2.44834	1.13977	0.537324
2567	GABRG3	gamma-aminobutyric acid (GABA) A receptor, gamma 3	-1.64893	-1.72251	-1.15376	-1.22286	-3.9919	-2.17622	0.213205	0.210635	-2.3374	-2.32349	0.758499	0.291428	0.174831	-0.728742	1.4484	0.819893	-3.53025	-2.56355	-0.828536	-0.638393	0.831736	0.169855	1.30107	0.699335	1.80816	0.539793	-3.95851	-2.44348	1.47682	0.747956
2568	GABRP	gamma-aminobutyric acid (GABA) A receptor, pi	0.449478	-0.217062	1.4055	0.561194	-3.16174	-1.68659	0.953242	0.865354	1.00868	0.239768	0.907267	0.427467	1.01658	0.424276	0.100473	-0.484188	1.31398	0.542083	1.8365	1.16541	1.73213	0.736786	1.52325	0.89881	1.09766	-0.199571	1.57659	0.859469	1.2564	0.61021
55879	GABRQ	gamma-aminobutyric acid (GABA) A receptor, theta	0.639809	-0.0805136	0.271292	-0.229459	-2.48153	-1.28539	-0.201651	-0.156392	-0.582679	-0.979291	0.592667	0.139785	0	-0.968223	1.39593	0.769133	-0.467993	-0.600341	1.63203	1.02702	1.46905	0.571139	-1.04989	-1.41135	1.22239	-0.0697737	-1.45597	-0.950143	1.63956	0.84966
2569	GABRR1	gamma-aminobutyric acid (GABA) A receptor, rho 1	0	-0.539528	0.215665	-0.268237	-1.08931	-0.46426	0.137504	0.143661	1.58903	0.684343	0.289013	-0.137886	0.79419	0.119646	0	-0.581393	0.961046	0.315814	-2.00821	-1.43685	1.80726	0.784093	-2.87127	-3.04658	1.63823	0.362963	-3.47156	-2.1529	0.915702	0.397294
2570	GABRR2	gamma-aminobutyric acid (GABA) A receptor, rho 2	0.958492	0.148117	0.158698	-0.307949	-1.6764	-0.810525	-0.125531	-0.0890481	1.63649	0.720696	0.495464	0.0509001	0.209228	-0.681626	1.03336	0.418355	0.620009	0.0971761	0.149899	0.0238516	0.399776	-0.102128	-1.47168	-1.79004	1.80816	0.539793	0.896139	0.453425	0	-0.17496
200959	GABRR3	gamma-aminobutyric acid (GABA) A receptor, rho 3	0.878321	0.0906007	0.325648	-0.191568	-2.3452	-1.20499	0	0.0220105	2.11122	1.08436	0.0499912	-0.356457	0	-0.968223	0.547932	-0.0512828	0	-0.300311	2.26015	1.45216	0.273792	-0.181454	0.173669	-0.312844	1.44559	0.16249	0.37485	0.142358	0	-0.17496
9514	GAL3ST1	galactose-3-O-sulfotransferase 1	1.42146	0.480264	1.63919	0.724097	-2.88747	-1.52483	0	0.0220105	1.58903	0.684343	0.910502	0.430425	1.53116	1.12913	1.10047	0.483287	-2.35855	-1.81237	2.11079	1.35106	1.71291	0.724684	0.719044	0.176793	0.808157	-0.500842	-1.74799	-1.1244	2.33808	1.28618
2587	GALR1	galanin receptor 1	0.263034	-0.350821	0	-0.418577	-3.47271	-1.87	-0.187707	-0.144056	0.117409	-0.442991	0.174447	-0.24265	1.01658	0.424276	1.10047	0.483287	0.367766	-0.064537	-1.43077	-1.04601	-0.0182121	-0.365313	-0.508697	-0.92547	1.72569	0.45398	0	-0.0813257	1.48141	0.750827
8811	GALR2	galanin receptor 2	1.59034	0.60142	1.64002	0.724676	0.548366	0.501654	0.869681	0.791427	-1.32017	-1.54425	0	-0.40217	1.20923	0.688158	0.547932	-0.0512828	1.18649	0.460346	2.23832	1.43738	1.95343	0.876126	1.80392	1.15079	2.22319	0.971696	2.23168	1.25038	1.14467	0.540383
8484	GALR3	galanin receptor 3	1.2726	0.373466	0.289092	-0.217051	0.793357	0.646151	0.566219	0.522951	0.265947	-0.329203	0.495464	0.0509001	0.79419	0.119646	1.2849	0.661713	1.45676	0.633614	2.06013	1.31677	1.20183	0.402887	1.11136	0.529014	0.223194	-1.10957	-1.30688	-0.861177	0.712795	0.27049
202309	GAPT	GRB2-binding adaptor protein, transmembrane	-2.58024	-2.39065	-0.0419904	-0.447848	-1.4193	-0.658885	0.566219	0.522951	0.570427	-0.0959563	0.676679	0.21661	1.01658	0.424276	0.728504	0.123416	0.787172	0.204344	0.457411	0.231988	0.19464	-0.231291	-0.08989	-0.549467	0.808157	-0.500842	0	-0.0813257	-1.84777	-1.3297
2642	GCGR	glucagon receptor	1.02206	0.19372	1.47554	0.610017	0	0.178225	0	0.0220105	0.584403	-0.0852507	0	-0.40217	0.531156	-0.240654	0.226004	-0.36274	0.904209	0.279376	0.375629	0.176635	1.75184	0.749197	1.17447	0.585674	1.44559	0.16249	1.95781	1.08695	2.02104	1.08806
78997	GDAP1L1	ganglioside induced differentiation associated protein 1-like 1	0.793433	0.0296994	1.76158	0.809418	3.7339	2.3805	-0.450742	-0.376766	0	-0.532931	0.289013	-0.137886	0.531156	-0.240654	0	-0.581393	1.65752	0.762324	1.13547	0.690927	1.53292	0.611354	0	-0.468763	0.445587	-0.878145	1.78521	0.983956	1.00722	0.454486
51573	GDE1	glycerophosphodiester phosphodiesterase 1	1.88518	0.812942	2.70103	1.46431	1.2197	0.89761	0	0.0220105	1.68459	0.757548	0.0489986	-0.357364	1.37915	0.920918	1.2849	0.661713	2.1341	1.06786	0	-0.077606	0.273792	-0.181454	0.625486	0.0927965	0	-1.34184	0.892312	0.451141	-1.32805	-1.00491
284161	GDPD1	glycerophosphodiester phosphodiesterase domain containing 1	2.73013	1.41913	3.20058	1.81254	1.63141	1.14044	1.20794	1.09069	1.68459	0.757548	1.23374	0.726007	1.79419	1.48943	1.4484	0.819893	1.89575	0.915051	2.22469	1.42815	0.16686	-0.248783	0.964191	0.396885	2.22319	0.971696	1.59017	0.867574	-1.32883	-1.00539
54857	GDPD2	glycerophosphodiester phosphodiesterase domain containing 2	-1.71387	-1.7691	-2.21593	-1.9633	0	0.178225	-0.996714	-0.859793	1.53757	0.644921	0.676037	0.216022	1.5175	1.11042	-1.12378	-1.66862	-2.37839	-1.82509	1.68772	1.06471	1.27764	0.450619	1.52514	0.900505	0.808157	-0.500842	-2.58612	-1.62453	-1.42565	-1.0659
79153	GDPD3	glycerophosphodiester phosphodiesterase domain containing 3	0.0661495	-0.492071	2.53725	1.35014	0.700466	0.591364	-0.088688	-0.0564527	-1.47295	-1.66128	0.289854	-0.137117	1.37915	0.920918	0.810966	0.203196	1.32949	0.55202	2.42469	1.56352	1.3742	0.51142	1.47263	0.853358	0.638232	-0.677672	1.48791	0.806551	1.12444	0.527742
220032	GDPD4	glycerophosphodiester phosphodiesterase domain containing 4	1.62351	0.625215	2.29357	1.18027	0.987218	0.760492	0.0335693	0.0517097	1.01516	0.244732	0.910502	0.430425	-1.3249	-2.78305	0	-0.581393	-2.04897	-1.6139	-1.68259	-1.21645	2.59295	1.2788	0	-0.468763	1.72569	0.45398	-0.950079	-0.648264	1.15979	0.549833
389400	GFRAL	GDNF family receptor alpha like	1.46786	0.513547	0.431716	-0.117628	0	0.178225	0.807355	0.736287	-1.70145	-1.83632	-2.14839	-2.36674	0	-0.968223	1.99859	1.3522	-3.14938	-2.31937	-0.650446	-0.517854	-0.151182	-0.449038	0	-0.468763	0	-1.34184	-1.73088	-1.11419	0.11422	-0.10358
2678	GGT1	gamma-glutamyltransferase 1	-0.826014	-1.13213	0.820114	0.153123	-1.87377	-0.926936	-0.0357041	-0.00957727	-1.65693	-1.80222	-2.15149	-2.36957	1.20923	0.688158	1.54793	0.916192	1.87462	0.901502	1.60685	1.00997	1.71934	0.728736	0.966045	0.39855	1.54512	0.26607	1.37485	0.739085	0.577377	0.185863
2687	GGT5	gamma-glutamyltransferase 5	0.864516	0.0806961	0.857354	0.179083	1.51582	1.07227	0.673134	0.61754	1.72064	0.785163	0.676037	0.216022	1.66866	1.31748	1.03336	0.418355	1.39894	0.596547	0.595085	0.325171	1.50171	0.591702	-1.2968	-1.63302	1.54512	0.26607	0.397592	0.155928	-1.0931	-0.858074
2686	GGT7	gamma-glutamyltransferase 7	2.56922	1.30369	2.12713	1.06424	1.92451	1.31331	2.07523	1.85799	2.5786	1.4424	-1.39428	-1.67715	1.20923	0.688158	-1.31642	-1.855	2.19485	1.10681	-0.354338	-0.317436	2.72362	1.36108	-1.23044	-1.57345	1.44559	0.16249	2.23964	1.25513	2.10127	1.1382
2690	GHR	growth hormone receptor	0.136769	-0.441407	1.15647	0.387595	0.521711	0.485933	0.77267	0.7056	2.03565	1.02648	1.28943	0.776934	0.79419	0.119646	0.728504	0.123416	2.7228	1.44527	3.66446	2.40265	2.16738	1.01084	1.30327	0.701312	2.33867	1.09187	-2.14021	-1.35845	-0.584434	-0.540192
2692	GHRHR	growth hormone releasing hormone receptor	0.958492	0.148117	1.03073	0.299946	1.46305	1.04114	1.30238	1.17424	0.825639	0.0995479	0.910502	0.430425	0	-0.968223	2.74957	2.07874	-1.05108	-0.97416	0.62999	0.348797	1.02249	0.289963	2.03833	1.36125	1.54512	0.26607	-2.17672	-1.38023	0.628738	0.21796
2693	GHSR	growth hormone secretagogue receptor	0.15956	-0.425056	1.4522	0.593751	1.17187	0.8694	1.55531	1.39801	3.37486	2.05238	1.72035	1.17098	0	-0.968223	2.03336	1.38583	2.52462	1.31822	4.51758	2.98007	4.09909	2.22714	0.609419	0.0783719	2.33867	1.09187	1.15366	0.607096	0.46297	0.114366
100527949	GIMAP1-GIMAP5	GIMAP1-GIMAP5 readthrough	NA	NA	0	-0.418577	-3.32193	-1.78107	0	0.0220105	NA	NA	NA	NA	NA	NA	1.1646	0.545331	-3.32193	-2.43	NA	NA	NA	NA	NA	NA	NA	NA	0.587588	0.269304	NA	NA
26157	GIMAP2	GTPase, IMAP family member 2	-1.36891	-1.52162	0.572398	-0.0195594	-2.33602	-1.19958	1.58959	1.42833	0.678091	-0.0134806	1.54453	1.01021	0.727763	0.0286552	2.4484	1.78737	-1.62772	-1.34384	-1.53446	-1.11619	1.72894	0.734777	1.41745	0.803822	1.66297	0.388702	-0.663545	-0.477281	0.699183	0.261983
116254	GINM1	glycoprotein integral membrane 1	-0.608809	-0.976302	-0.327772	-0.647066	1.36638	0.984127	-1.93951	-1.69389	0.699618	0.00300985	-0.981412	-1.29961	1.37915	0.920918	-1.05063	-1.59785	-0.55681	-0.657282	-2.0544	-1.46811	-2.33932	-1.8268	-1.26157	-1.6014	2.73697	1.50635	0.0133328	-0.0733697	0.490723	0.13171
2696	GIPR	gastric inhibitory polypeptide receptor	-2.76553	-2.52359	1.63855	0.723651	0.793357	0.646151	1.64827	1.48026	1.26595	0.436845	0.289013	-0.137886	1.37915	0.920918	0.192645	-0.395014	-0.876508	-0.86224	1.39033	0.863423	1.77534	0.763994	0.966045	0.39855	0	-1.34184	1.29678	0.692498	1.15979	0.549833
2697	GJA1	gap junction protein, alpha 1, 43kDa	1.31382	0.40304	1.24417	0.44873	-2.9101	-1.53817	-2.76449	-2.42377	1.53996	0.646754	0.836501	0.362756	0.531156	-0.240654	1.1646	0.545331	-1.56199	-1.3017	-3.42615	-2.39656	-0.133525	-0.43792	-1.36081	-1.6905	1.88616	0.620966	1.30983	0.700284	-0.984144	-0.789985
84694	GJA10	gap junction protein, alpha 10, 62kDa	0	-0.539528	0.158698	-0.307949	0.471429	0.456276	0.289507	0.27814	0	-0.532931	0	-0.40217	0	-0.968223	1.59524	0.961959	0	-0.300311	1.12821	0.686014	-0.633287	-0.752594	-2.32469	-2.55587	1.33867	0.0512303	-0.128156	-0.1578	0.915702	0.397294
2700	GJA3	gap junction protein, alpha 3, 46kDa	1.79343	0.747123	0.702101	0.0708568	1.90053	1.29917	0.27836	0.268278	0.682429	-0.0101575	0	-0.40217	1.01658	0.424276	0.540568	-0.0584067	-0.946059	-0.906828	0	-0.077606	0.607551	0.0286972	1.5752	0.945451	1.22319	-0.0689394	-0.561614	-0.416456	0	-0.17496
2701	GJA4	gap junction protein, alpha 4, 37kDa	0.945436	0.13875	1.0966	0.345861	1.11171	0.833921	0.26107	0.252982	1.26595	0.436845	-1.42809	-1.70807	0.209228	-0.681626	1.1646	0.545331	-1.12953	-1.02445	-0.102761	-0.147159	2.24976	1.06271	1.3629	0.754845	1.63823	0.362963	1.30883	0.699687	1.42367	0.714743
2702	GJA5	gap junction protein, alpha 5, 40kDa	2.99697	1.61057	2.91786	1.61546	-0.914929	-0.361406	0.749481	0.685085	1.56339	0.6647	-1.28846	-1.58039	0	-0.968223	0	-0.581393	-0.356048	-0.528573	-0.846842	-0.650782	2.6108	1.29004	1.41677	0.803214	2.16179	0.907801	-0.36895	-0.301488	2.40691	1.3292
2703	GJA8	gap junction protein, alpha 8, 50kDa	2.334	1.13494	0.490984	-0.0763128	0.348295	0.383651	0	0.0220105	1.61168	0.701694	0.0489986	-0.357364	0	-0.968223	0	-0.581393	0.269959	-0.127241	-0.829784	-0.639237	2.29933	1.09392	1.30107	0.699335	1.72569	0.45398	-1.69154	-1.09072	1.90067	1.01283
81025	GJA9	gap junction protein, alpha 9, 59kDa	2.12408	0.984336	0.964524	0.253791	0.62642	0.547691	0.62298	0.573168	1.71853	0.783546	0.0489986	-0.357364	0.209228	-0.681626	0.962969	0.350255	1.64766	0.756003	-0.585505	-0.473899	2.78535	1.39994	1.04097	0.465819	1.63823	0.362963	1.86294	1.03034	1.27487	0.621753
2705	GJB1	gap junction protein, beta 1, 32kDa	1.38324	0.452845	1.4562	0.596536	0.719356	0.602505	0.932801	0.84727	0.133568	-0.430612	0.980891	0.494792	0.174831	-0.728742	1.54793	0.916192	1.4048	0.600307	1.53446	0.960979	-0.626108	-0.748074	1.17768	0.588551	0.96016	-0.342662	0.849557	0.425628	0	-0.17496
2706	GJB2	gap junction protein, beta 2, 26kDa	2.00957	0.902183	-0.547455	-0.800207	1.86665	1.27919	0.749481	0.685085	0.770147	0.0570384	1.28901	0.77655	0	-0.968223	1.24101	0.619251	0.793898	0.208656	-0.763754	-0.594545	-1.88823	-1.54276	1.30181	0.699995	1.54512	0.26607	2.06224	1.14927	0	-0.17496
2707	GJB3	gap junction protein, beta 3, 31kDa	1.14136	0.279308	1.76312	0.810491	0.465847	0.452984	0.0613919	0.0763246	1.43651	0.567508	-2.34879	-2.54999	-1.79077	-3.42119	0.810966	0.203196	1.5069	0.665763	-1.59545	-1.15747	1.76218	0.755705	0.719044	0.176793	1.09766	-0.199571	1.99477	1.10901	1.706	0.891181
127534	GJB4	gap junction protein, beta 4, 30.3kDa	1.04672	0.211413	0	-0.418577	0.465847	0.452984	0	0.0220105	0.92739	0.177494	0.0480054	-0.358272	0.531156	-0.240654	1.10047	0.483287	-1.26236	-1.10961	0	-0.077606	1.63636	0.676487	0.304006	-0.195827	1.63823	0.362963	1.49847	0.812852	-1.38288	-1.03917
2709	GJB5	gap junction protein, beta 5, 31.1kDa	1.39289	0.459768	0.965288	0.254324	-1.79156	-0.878449	0.912066	0.828926	0.92739	0.177494	0	-0.40217	0.531156	-0.240654	1.2849	0.661713	0.861879	0.252238	-2.21576	-1.57732	2.16267	1.00787	0.888969	0.329351	0.96016	-0.342662	1.95215	1.08358	1.66439	0.865174
10804	GJB6	gap junction protein, beta 6, 30kDa	1.66392	0.654209	1.27366	0.46929	1.64474	1.1483	2.02609	1.81451	1.20731	0.391925	0.395929	-0.0401189	0.209228	-0.681626	0.540568	-0.0584067	0.729768	0.167542	-1.36296	-1.00011	1.82129	0.792926	0.0374487	-0.435142	0.96016	-0.342662	-1.14658	-0.76552	0.650311	0.231442
375519	GJB7	gap junction protein, beta 7, 25kDa	-2.65869	-2.44693	1.12776	0.367579	1.47143	1.04608	-0.953242	-0.821333	1.07248	0.288637	0	-0.40217	-1.30535	-2.75626	0.888969	0.278662	1.66732	0.768602	-1.43146	-1.04648	1.76915	0.760097	-2.83029	-3.0098	1.22319	-0.0689394	-2.60713	-1.63707	1.67495	0.871776
10052	GJC1	gap junction protein, gamma 1, 45kDa	1.4587	0.506976	1.5036	0.629577	-1.72574	-0.839629	0.187707	0.188077	1.85476	0.887903	1.54312	1.00892	0.531156	-0.240654	1.34148	0.716456	1.22678	0.486177	0.821988	0.478749	0.633287	0.0449021	0.247724	-0.246358	0.638232	-0.677672	1.77656	0.978795	1.50458	0.765305
57165	GJC2	gap junction protein, gamma 2, 47kDa	0.718665	-0.0239408	3.31829	1.8946	-0.635256	-0.196453	1.15278	1.04189	1.52796	0.63756	0.837076	0.363282	1.8886	1.61875	1.49902	0.868873	2.18649	1.10144	1.26093	0.775844	3.13724	1.62151	0.458275	-0.0573254	1.09766	-0.199571	2.24196	1.25651	1.28402	0.627469
349149	GJC3	gap junction protein, gamma 3, 30.2kDa	1.57347	0.589315	1.30044	0.487961	1.10455	0.829694	0	0.0220105	1.71828	0.783352	1.3971	0.875387	1.37915	0.920918	0.448396	-0.147581	1.62271	0.740009	1.31905	0.815177	1.22132	0.415159	1.96465	1.2951	0	-1.34184	-1.06976	-0.71968	1.29776	0.636053
57369	GJD2	gap junction protein, delta 2, 36kDa	0	-0.539528	0	-0.418577	0	0.178225	-2.39505	-2.09692	0.931041	0.180291	0	-0.40217	0	-0.968223	0.448396	-0.147581	-2.66885	-2.01131	0	-0.077606	-0.0513992	-0.38621	0	-0.468763	0	-1.34184	1.21424	0.643245	-1.41512	-1.05931
125111	GJD3	gap junction protein, delta 3, 31.9kDa	1.21936	0.335269	-0.53178	-0.78928	0.738855	0.614006	0	0.0220105	1.5751	0.673672	0.911048	0.430925	0.47572	-0.316589	0.547932	-0.0512828	1.74369	0.817569	0	-0.077606	0	-0.353846	0.966971	0.399381	0.96016	-0.342662	0.612327	0.284067	0.867505	0.367174
219770	GJD4	gap junction protein, delta 4, 40.1kDa	1.1753	0.303662	1.43061	0.578699	1.32941	0.962319	1.32521	1.19444	1.31393	0.473604	0	-0.40217	0	-0.968223	1.34148	0.716456	1.20678	0.473351	0.846155	0.495106	1.79106	0.773893	1.03921	0.464238	1.09766	-0.199571	0	-0.0813257	1.36431	0.677641
56287	GKN1	gastrokine 1	0.93226	0.129298	0.894995	0.205323	-0.278784	0.0137963	0.187707	0.188077	-1.64819	-1.79552	0	-0.40217	0	-0.968223	0	-0.581393	0	-0.300311	1.95216	1.24369	0.966108	0.254462	0	-0.468763	0.223194	-1.10957	-0.834017	-0.579007	0	-0.17496
89944	GLB1L2	galactosidase, beta 1-like 2	-1.15471	-1.36794	0	-0.418577	-1.90225	-0.943735	0	0.0220105	0.381869	-0.240401	0.981412	0.495268	1.75979	1.44231	1.96297	1.31773	1.95106	0.950511	-0.375629	-0.331847	1.63636	0.676487	1.11052	0.528262	0	-1.34184	0.96579	0.494987	1.19927	0.574503
342035	GLDN	gliomedin	0.118272	-0.454677	0.429871	-0.118915	-1.77148	-0.866607	-0.912066	-0.784905	1.26883	0.439057	0.0480054	-0.358272	0.531156	-0.240654	1.34148	0.716456	1.10544	0.408383	0	-0.077606	-0.228805	-0.497913	0.887991	0.328473	0	-1.34184	0.994768	0.51228	-1.01884	-0.811665
2734	GLG1	golgi glycoprotein 1	-1.10585	-1.33289	-2.02654	-1.83127	-3.09159	-1.64521	-2.84077	-2.49125	-0.747724	-1.10572	1.34792	0.830419	-0.237954	-1.29417	1.39593	0.769133	-1.24047	-1.09558	-1.10276	-0.823999	-3.95304	-2.84287	-3.04943	-3.20654	0.96016	-0.342662	-2.34831	-1.48263	-1.58457	-1.16521
11010	GLIPR1	GLI pathogenesis-related 1	1.5304	0.558416	0.700112	0.0694702	-3.3452	-1.79479	0	0.0220105	1.00522	0.237118	0	-0.40217	1.20923	0.688158	0.641041	0.0387982	0.493205	0.0158817	0	-0.077606	0	-0.353846	0.963262	0.396052	2.16179	0.907801	0.118079	-0.0108646	1.93042	1.03143
144321	GLIPR1L2	GLI pathogenesis-related 1 like 2	1.38324	0.452845	1.08918	0.34069	1.27878	0.932459	0.0652091	0.0797017	1.43908	0.569474	0.588574	0.136043	0.79419	0.119646	0.448396	-0.147581	1.34177	0.559895	0	-0.077606	0.565434	0.00217838	1.62359	0.988889	1.88616	0.620966	0.735813	0.357754	1.01288	0.458024
2740	GLP1R	glucagon-like peptide 1 receptor	0	-0.539528	1.89459	0.902141	-2.94044	-1.55606	-1.54474	-1.34464	1.19825	0.384985	0	-0.40217	1.01658	0.424276	1.49902	0.868873	-0.340939	-0.518887	0.096805	-0.0120845	2.07835	0.954784	0	-0.468763	0.96016	-0.342662	-0.658325	-0.474166	-1.12266	-0.876549
9340	GLP2R	glucagon-like peptide 2 receptor	-0.293359	-0.749991	-0.571728	-0.817128	-3.49275	-1.88182	-2.78381	-2.44086	0	-0.532931	0.836501	0.362756	1.36397	0.900116	1.1646	0.545331	-3.49341	-2.53993	-1.23097	-0.910778	-1.09164	-1.04119	-2.66018	-2.85707	2.33867	1.09187	-1.78636	-1.14729	-2.48421	-1.72743
2741	GLRA1	glycine receptor, alpha 1	1.24089	0.350717	0	-0.418577	-2.31525	-1.18733	0	0.0220105	0	-0.532931	0	-0.40217	0.990798	0.388955	0.341481	-0.251019	1.65752	0.762324	-1.0162	-0.765408	0.478663	-0.0524566	1.84732	1.18976	2.16179	0.907801	-1.53672	-0.998329	-2.28923	-1.60558
2742	GLRA2	glycine receptor, alpha 2	0.20847	-0.389967	0	-0.418577	-2.1697	-1.10148	0.673134	0.61754	0.208598	-0.373135	0.676037	0.216022	1.19213	0.66474	0.641041	0.0387982	-2.35119	-1.80766	-0.847664	-0.651339	0.130787	-0.271497	-2.29155	-2.52611	1.96016	0.697973	-3.16966	-1.97275	0.650311	0.231442
8001	GLRA3	glycine receptor, alpha 3	0.172467	-0.415796	0.965288	0.254324	-3.46897	-1.8678	1.49577	1.34533	-0.0753818	-0.590677	0	-0.40217	1.01658	0.424276	-2.3505	-2.85544	-2.62537	-1.98343	-0.983576	-0.74333	-1.15212	-1.07928	-2.48794	-2.70243	0.36257	-0.964535	-3.21561	-2.00017	0.915702	0.397294
441509	GLRA4	glycine receptor, alpha 4	0.822287	0.0504005	-3.34185	-2.74817	-4.64386	-2.56075	0	0.0220105	0.469219	-0.173487	-1.27144	-1.56482	1.37915	0.920918	1.39593	0.769133	0	-0.300311	0	-0.077606	0	-0.353846	0.887991	0.328473	1.22319	-0.0689394	-2.32193	-1.46688	-2.19547	-1.54699
2743	GLRB	glycine receptor, beta	1.14136	0.279308	0.503406	-0.0676534	-1.66619	-0.804506	-0.980702	-0.845628	-1.38146	-1.59119	0.910502	0.430425	0	-0.968223	0.584963	-0.0154565	-2.08904	-1.6396	-0.821777	-0.633818	-1.7774	-1.47298	1.41948	0.805646	1.54512	0.26607	-3.45852	-2.14512	0	-0.17496
55830	GLT8D1	glycosyltransferase 8 domain containing 1	1.31382	0.40304	-1.68821	-1.59542	0.335362	0.376023	-1	-0.862701	0.485648	-0.160901	-2.78646	-2.95021	-1.1127	-2.49238	-0.36257	-0.93217	-0.301248	-0.493441	-3.75339	-2.61805	-0.765346	-0.835745	0.228269	-0.263824	0.808157	-0.500842	1.42697	0.770187	0.418778	0.0867487
2798	GNRHR	gonadotropin-releasing hormone receptor	-2.04933	-2.00976	0.930113	0.229803	1.32941	0.962319	1.01641	0.921237	0.236749	-0.35157	0.396709	-0.0394052	0.79419	0.119646	-1.17121	-1.71451	1.558	0.698521	1.31979	0.815684	-0.143302	-0.444076	-0.961417	-1.33192	1.33867	0.0512303	-0.911905	-0.625484	-2.69878	-1.86152
51280	GOLM1	golgi membrane protein 1	1.03444	0.202604	-0.431163	-0.71914	-1.9211	-0.954851	-0.38811	-0.321354	1.19825	0.384985	0	-0.40217	1.79419	1.48943	0.962969	0.350255	0.800582	0.212941	-0.480568	-0.402873	-1.45014	-1.26692	1.30327	0.701312	1.72569	0.45398	-2.64184	-1.65778	1.05103	0.481868
2811	GP1BA	glycoprotein Ib (platelet), alpha polypeptide	0	-0.539528	0.273352	-0.228024	-1.73687	-0.846194	0.566219	0.522951	0.584403	-0.0852507	0.980891	0.494792	0.79419	0.119646	0.810966	0.203196	0	-0.300311	1.54699	0.969462	1.16489	0.379623	0.602665	0.0723076	0.638232	-0.677672	0.539947	0.240876	1.35565	0.672235
2812	GP1BB	glycoprotein Ib (platelet), beta polypeptide	0.671871	-0.0575121	-0.00292068	-0.420613	0	0.178225	0	0.0220105	0.31639	-0.290561	0	-0.40217	0	-0.968223	0	-0.581393	0	-0.300311	1.50638	0.94197	1.92832	0.860317	0	-0.468763	1.22319	-0.0689394	0.450084	0.187252	0	-0.17496
2813	GP2	glycoprotein 2 (zymogen granule membrane)	0.3539	-0.285631	-0.869998	-1.02505	0.548366	0.501654	-0.53943	-0.455229	0.381869	-0.240401	-2.34879	-2.54999	0	-0.968223	0	-0.581393	-3.05045	-2.25595	0.67636	0.380182	0.658855	0.0610013	0.803398	0.252526	0	-1.34184	-0.970184	-0.660261	-1.15236	-0.895112
2814	GP5	glycoprotein V (platelet)	2.02206	0.911144	0	-0.418577	1.17187	0.8694	-0.936258	-0.806307	3.39011	2.06406	1.63562	1.09349	0	-0.968223	0	-0.581393	-1.33358	-1.15527	4.32452	2.8494	2.27916	1.08122	1.64713	1.01003	1.09766	-0.199571	0.923989	0.470044	2.42981	1.34351
51206	GP6	glycoprotein VI (platelet)	-0.943533	-1.21644	1.68032	0.752772	0.714657	0.599734	-0.174086	-0.132006	0	-0.532931	0.676037	0.216022	0	-0.968223	0.0544478	-0.528716	-1.26388	-1.11058	0.979681	0.585482	0.559865	-0.00132763	1.30254	0.700654	0.445587	-0.878145	1.93671	1.07436	1.41537	0.709556
2815	GP9	glycoprotein IX (platelet)	0.793433	0.0296994	0.272322	-0.228741	0	0.178225	0	0.0220105	2.7026	1.53739	0.290694	-0.136349	0.531156	-0.240654	0.728504	0.123416	1.23009	0.488297	2.19875	1.4106	1.59572	0.650896	1.8826	1.22143	0	-1.34184	0.519358	0.228589	0.516169	0.147612
10223	GPA33	glycoprotein A33 (transmembrane)	2.85407	1.50805	2.77856	1.51835	0.36038	0.390779	-0.323064	-0.263808	1.62301	0.710371	0	-0.40217	1.79419	1.48943	0.226004	-0.36274	-1.71772	-1.40154	1.96107	1.24973	1.73357	0.737691	0.256001	-0.238926	2.16179	0.907801	-2.24922	-1.4235	-0.0796612	-0.224743
151306	GPBAR1	G protein-coupled bile acid receptor 1	0.623508	-0.0922089	0.965288	0.254324	1.37832	0.991166	1.37426	1.23783	0.856679	0.123326	0	-0.40217	1.20923	0.688158	1.39593	0.769133	0.874615	0.260404	0.51493	0.270919	1.87867	0.829058	1.17607	0.587114	0.445587	-0.878145	0.994768	0.51228	1.68189	0.876112
2852	GPER1	G protein-coupled estrogen receptor 1	1.5304	0.558416	1.0959	0.345374	0.714657	0.599734	1.06499	0.964221	1.71006	0.777055	1.34427	0.827079	1.19213	0.66474	0.788496	0.181457	2.19667	1.10797	1.11878	0.679628	1.16603	0.380341	1.41745	0.803822	2.63823	1.4036	2.01233	1.11949	1.26567	0.616
2823	GPM6A	glycoprotein M6A	-0.671871	-1.02154	0.430609	-0.1184	-2.72075	-1.42649	-0.484311	-0.406465	0.890919	0.149556	0.758499	0.291428	1.20923	0.688158	-1	-1.54887	-3.17024	-2.33275	-1.33951	-0.984237	0.0515276	-0.321402	0	-0.468763	0.652077	-0.663265	-1.51126	-0.983136	0.279579	-0.000241236
2824	GPM6B	glycoprotein M6B	0.891996	0.100411	1.68125	0.753421	-1.29274	-0.58424	-1.03917	-0.897357	-0.374712	-0.819979	0.676679	0.21661	0.77135	0.0883605	0.616671	0.015221	1.29176	0.527837	0.181258	0.0450765	0.382209	-0.113189	0.801323	0.250662	1.33867	0.0512303	1.38627	0.745897	-2.63905	-1.82419
10457	GPNMB	glycoprotein (transmembrane) nmb	2.10071	0.967574	1.45438	0.595271	-2.36168	-1.21471	1.99863	1.79022	2.22953	1.175	0.837076	0.363282	0.174831	-0.728742	1.81097	1.17067	1.96318	0.958283	1.50409	0.94042	0.288342	-0.172292	1.66869	1.02939	2.09766	0.841064	2.79651	1.58743	-0.572597	-0.532795
2825	GPR1	G protein-coupled receptor 1	0.141356	-0.438116	1.1879	0.409506	1.17187	0.8694	-1.78411	-1.55641	0.848981	0.117429	0.912686	0.432423	0.79419	0.119646	0.100473	-0.484188	1.15873	0.442551	1.57111	0.985783	-0.435147	-0.627836	0.719044	0.176793	1.63823	0.362963	2.06224	1.14927	2.03208	1.09496
83550	GPR101	G protein-coupled receptor 101	0.412003	-0.243947	0.156691	-0.309348	0	0.178225	1.152	1.0412	1.8793	0.906705	0.679248	0.218958	0.531156	-0.240654	1.10047	0.483287	1.69169	0.784228	-0.585505	-0.473899	1.04124	0.301767	0	-0.468763	1.58496	0.30753	1.15366	0.607096	0	-0.17496
57720	GPR107	G protein-coupled receptor 107	-0.444785	-0.858627	-0.183761	-0.546677	0.347923	0.383432	-1.67391	-1.45892	2.38659	1.29531	-0.289854	-0.667223	0.584963	-0.166951	0.610053	0.00881838	0.408698	-0.0382952	-1.87638	-1.34761	-2.80117	-2.1176	1.84531	1.18795	1.80816	0.539793	0.908237	0.460644	1.32193	0.651158
56927	GPR108	G protein-coupled receptor 108	1.14136	0.279308	0.251192	-0.243471	1.15675	0.860485	1.76112	1.58009	-0.0709002	-0.587244	0	-0.40217	1.19213	0.66474	2.4484	1.78737	-0.772484	-0.79555	-2.39238	-1.69687	-1.13509	-1.06856	1.0016	0.430471	3.0645	1.84719	1.14024	0.599086	0.0255545	-0.15899
266977	GPR110	G protein-coupled receptor 110	1.52163	0.552124	1.15703	0.387984	0.926803	0.724859	-0.447156	-0.373594	1.71218	0.778681	0.676037	0.216022	0.209228	-0.681626	0.448396	-0.147581	2.14828	1.07695	1.44423	0.899909	1.74412	0.744338	1.24184	0.646158	1.54512	0.26607	2.35022	1.32111	1.88581	1.00355
222611	GPR111	G protein-coupled receptor 111	0	-0.539528	0.527932	-0.0505566	-2.21881	-1.13044	0.953242	0.865354	-2.0108	-2.0733	0.588574	0.136043	0	-0.968223	1.03336	0.418355	1.63774	0.749639	1.79507	1.13737	-0.115477	-0.426556	0.966045	0.39855	1.22319	-0.0689394	-0.927087	-0.634544	1.38582	0.691088
139378	GPR112	G protein-coupled receptor 112	-1.99343	-1.96966	0.661198	0.0423433	-5.36532	-2.98628	-0.106915	-0.0725786	-3.7841	-3.43173	0.399827	-0.0365543	1.37915	0.920918	1.85049	1.20891	-4.98665	-3.49725	-4.32898	-3.00763	1.05796	0.312295	0.887012	0.327595	-0.638232	-2.00601	-1.39794	-0.915514	-1.82433	-1.31505
165082	GPR113	G protein-coupled receptor 113	-0.23254	-0.706358	1.40578	0.561391	-1.49213	-0.701844	-0.643648	-0.547432	1.07248	0.288637	0.289013	-0.137886	0.79419	0.119646	1.34148	0.716456	1.08731	0.396765	0.708612	0.402011	1.79513	0.776454	-1.04282	-1.405	1.54512	0.26607	-1.80257	-1.15697	-0.235397	-0.322068
221188	GPR114	G protein-coupled receptor 114	0	-0.539528	0.15736	-0.308881	0.859495	0.68516	0.953242	0.865354	1.06917	0.286102	1.17354	0.670953	0	-0.968223	1.39593	0.769133	1.5069	0.665763	0.102761	-0.00805337	1.07586	0.323567	-0.508697	-0.92547	0	-1.34184	0.0622371	-0.0441871	-2.41172	-1.68212
221393	GPR115	G protein-coupled receptor 115	1.61529	0.619317	1.57215	0.677364	-1.36127	-0.624661	-0.0964866	-0.0633523	1.52796	0.63756	1.44693	0.920956	-2.32193	-4.14876	-1.22146	-1.76312	-0.489313	-0.61401	-1.29097	-0.951388	-0.526026	-0.685058	0.302539	-0.197144	1.72569	0.45398	-2.2373	-1.41638	-0.817346	-0.685747
221395	GPR116	G protein-coupled receptor 116	1.5304	0.558416	1.09555	0.345131	0.99111	0.762787	0	0.0220105	1.52313	0.63386	0	-0.40217	1.01658	0.424276	1.34148	0.716456	-0.0476789	-0.330878	0.805008	0.467255	-0.802648	-0.859232	0.624761	0.0921456	2.09766	0.841064	-1.49716	-0.974721	-2.35779	-1.64842
139760	GPR119	G protein-coupled receptor 119	1.04672	0.211413	1.35451	0.525651	-1.67021	-0.806877	0.28833	0.277099	0.565739	-0.0995481	0.0519743	-0.354643	1.37915	0.920918	1.39593	0.769133	0.366246	-0.0655116	0.583329	0.317214	-1.16892	-1.08985	0.416774	-0.0945845	1.19265	-0.10073	-0.252591	-0.232054	-2.04228	-1.45125
2835	GPR12	G protein-coupled receptor 12	1.00957	0.184759	1.61691	0.708571	2.55281	1.68389	0.325211	0.309728	-2.3493	-2.33261	0	-0.40217	1.20923	0.688158	1.4484	0.819893	-2.12837	-1.66481	0.785071	0.453761	1.22532	0.417673	0	-0.468763	1.22319	-0.0689394	-1.94708	-1.2432	-2.0761	-1.47239
84435	GPR123	G protein-coupled receptor 123	-0.438121	-0.853847	0.416153	-0.128477	0	0.178225	-0.967875	-0.83428	-1.49647	-1.6793	0	-0.40217	0.957105	0.342803	3.20343e-16	-0.581393	-1.60208	-1.3274	-0.433435	-0.370972	2.17832	1.01773	0	-0.468763	0.445587	-0.878145	-2.36017	-1.48971	0.13459	-0.0908495
25960	GPR124	G protein-coupled receptor 124	2.69727	1.39555	2.33699	1.21054	1.24984	0.91539	-1.33403	-1.15822	-0.0735657	-0.589286	1.04801	0.556163	1.65625	1.30048	0.641041	0.0387982	1.19423	0.465311	3.09742	2.01885	1.86132	0.818132	-0.301816	-0.739733	2.49621	1.25581	1.60257	0.874973	1.14267	0.539135
166647	GPR125	G protein-coupled receptor 125	-2.09761	-2.0444	1.05347	0.315797	-2.03562	-1.0224	-0.029641	-0.00421325	-2.62833	-2.54636	1.17354	0.670953	1.20923	0.688158	0.341481	-0.251019	-1.58832	-1.31858	-1.13547	-0.846139	-0.670834	-0.776236	-0.21399	-0.660883	1.72569	0.45398	-2.40842	-1.5185	-1.37794	-1.03608
57211	GPR126	G protein-coupled receptor 126	-1.72106	-1.77425	1.7421	0.795838	-1.26654	-0.568789	0.450742	0.420787	1.48669	0.605943	-0.000910505	-0.403003	0.531156	-0.240654	1.1646	0.545331	-1.77253	-1.43668	1.10276	0.668787	0.689769	0.0804659	0.625934	0.0931991	2.16179	0.907801	-4.29888	-2.64659	-0.770934	-0.656743
84873	GPR128	G protein-coupled receptor 128	0.891996	0.100411	1.12696	0.367024	-2.55336	-1.32776	1.24157	1.12044	1.49381	0.611401	0	-0.40217	0	-0.968223	0.641041	0.0387982	-1.84702	-1.48443	0.342063	0.153916	1.14576	0.367582	0	-0.468763	1.09766	-0.199571	0	-0.0813257	1.02384	0.464875
29933	GPR132	G protein-coupled receptor 132	1.30812	0.39895	1.40522	0.560998	0.714657	0.599734	1.43629	1.29271	1.42362	0.557627	1.8365	1.27719	1.01658	0.424276	1.49902	0.868873	1.396	0.594661	-0.416932	-0.359802	2.077	0.953933	0.804435	0.253457	1.44559	0.16249	0.519358	0.228589	1.3943	0.696383
283383	GPR133	G protein-coupled receptor 133	-1.40223	-1.54552	-1.9307	-1.76446	-1.39513	-0.644629	0	0.0220105	0.931041	0.180291	1.04801	0.556163	1.37915	0.920918	1.4484	0.819893	-2.48873	-1.89583	0	-0.077606	0.291175	-0.170508	1.17768	0.588551	2.59243	1.35593	-2.32193	-1.46688	1.50458	0.765305
64582	GPR135	G protein-coupled receptor 135	0.334001	-0.299908	1.15769	0.38845	0.863746	0.687667	-0.397681	-0.329823	2.10173	1.07709	0.173536	-0.243483	1.53116	1.12913	1.03336	0.418355	-1.33021	-1.15311	0.937317	0.556808	0.340215	-0.13963	1.17768	0.588551	1.22319	-0.0689394	0.908237	0.460644	-2.06456	-1.46517
56834	GPR137	G protein-coupled receptor 137	1.63981	0.63691	1.32813	0.507259	0.793357	0.646151	0.392056	0.368867	1.46671	0.590636	1.17354	0.670953	0.997028	0.39749	1.1646	0.545331	0.465475	-0.00189569	0	-0.077606	0.88353	0.202467	1.6721	1.03245	1.09766	-0.199571	-1.21761	-0.807906	1.62874	0.842894
7107	GPR137B	G protein-coupled receptor 137B	2.07097	0.946233	3.37748	1.93586	-1.06946	-0.452552	0	0.0220105	1.71642	0.781927	1.28943	0.776934	0.748143	0.0565714	-1.37056	-1.90738	-0.170009	-0.409304	-0.738017	-0.577125	1.7557	0.751627	1.3858	0.775405	2.03055	0.771223	2.48652	1.40245	2.82884	1.59288
283554	GPR137C	G protein-coupled receptor 137C	1.62351	0.625215	1.35373	0.525108	0.378319	0.40136	-0.953242	-0.821333	1.31113	0.47146	0.759106	0.291983	1.37915	0.920918	0.888969	0.278662	2.24663	1.14	1.77445	1.12341	-0.237391	-0.503319	1.71794	1.0736	1.22319	-0.0689394	0.397592	0.155928	1.40702	0.704338
124274	GPR139	G protein-coupled receptor 139	0.793433	0.0296994	2.14077	1.07375	-2.57367	-1.33974	-0.421697	-0.35107	0	-0.532931	1.17354	0.670953	1.37915	0.920918	0.641041	0.0387982	0	-0.300311	-0.37707	-0.332822	0.540695	-0.0133981	0	-0.468763	0	-1.34184	-2.32193	-1.46688	0.628738	0.21796
353345	GPR141	G protein-coupled receptor 141	1.62351	0.625215	-1.43892	-1.42164	-1.39288	-0.643304	-0.41005	-0.340765	1.06253	0.281015	1.49546	0.965336	0.997028	0.39749	1.10047	0.483287	1.69169	0.784228	-1.49108	-1.08683	1.42673	0.544495	1.17607	0.587114	1.88616	0.620966	-1.86217	-1.19253	1.05103	0.481868
350383	GPR142	G protein-coupled receptor 142	1.65593	0.648475	2.37784	1.23901	0	0.178225	0.227898	0.223634	-2.20109	-2.21907	1.34468	0.827449	1.37915	0.920918	1.54793	0.916192	-1.07517	-0.989604	1.29028	0.795708	-0.942593	-0.947348	1.10633	0.524493	2.33867	1.09187	-1.97323	-1.25881	2.73982	1.53725
4935	GPR143	G protein-coupled receptor 143	1.26211	0.365938	0.533683	-0.0465471	-2.02549	-1.01642	0.749481	0.685085	-0.0736256	-0.589332	0.0489986	-0.357364	1.5175	1.11042	0.547932	-0.0512828	-1.23848	-1.0943	0.70486	0.399472	-0.23798	-0.50369	1.6704	1.03092	1.54512	0.26607	0.923989	0.470044	1.35565	0.672235
115330	GPR146	G protein-coupled receptor 146	2.10071	0.967574	1.27294	0.468788	1.16844	0.867375	2.05042	1.83604	2.02735	1.02012	1.79862	1.24255	1.5175	1.11042	0.962969	0.350255	2.13069	1.06567	1.11878	0.679628	0.689487	0.0802886	1.47197	0.852773	2.09766	0.841064	1.58027	0.861662	1.72301	0.901809
344561	GPR148	G protein-coupled receptor 148	0.945436	0.13875	0.328623	-0.189494	0.372364	0.397847	0.137504	0.143661	0	-0.532931	0	-0.40217	0	-0.968223	1.1646	0.545331	-1.43888	-1.22278	0.403763	0.195677	-0.415037	-0.615174	-0.29042	-0.729502	0.96016	-0.342662	-0.674728	-0.483955	1.77286	0.932961
344758	GPR149	G protein-coupled receptor 149	1.43086	0.487007	1.21491	0.428338	0.994991	0.765076	1.0367	0.939192	3.39284	2.06615	0.497649	0.0528974	0	-0.968223	1.03336	0.418355	-1.91298	-1.52672	0.91768	0.543516	3.11843	1.60967	0.708005	0.166882	0.808157	-0.500842	-2.64184	-1.65778	-1.09667	-0.860306
2838	GPR15	G protein-coupled receptor 15	1.69546	0.676834	0.478485	-0.0850257	-1.71589	-0.83382	1.11371	1.00732	1.8158	0.858059	1.049	0.557072	-1.1127	-2.49238	0	-0.581393	1.51235	0.669253	2.23753	1.43684	1.64162	0.679796	1.03833	0.463447	0.223194	-1.10957	0.239637	0.0616722	0.279579	-0.000241236
285601	GPR150	G protein-coupled receptor 150	0.971431	0.1574	0.653293	0.0368326	1.17187	0.8694	0.450742	0.420787	0.856679	0.123326	1.40294	0.880726	1.53116	1.12913	1.03336	0.418355	0	-0.300311	-0.158121	-0.184629	0.544879	-0.0107637	-0.698505	-1.09588	1.33867	0.0512303	0.264594	0.076565	-0.484777	-0.477913
134391	GPR151	G protein-coupled receptor 151	1.04672	0.211413	0.430978	-0.118142	1.79336	1.23596	1.2935	1.16638	1.59364	0.687877	3.09023	2.42365	-0.179127	-1.21359	0.448396	-0.147581	1.29176	0.527837	0	-0.077606	1.52393	0.605697	0.803398	0.252526	1.72569	0.45398	-3.18416	-1.9814	1.69233	0.882634
390212	GPR152	G protein-coupled receptor 152	2.2985	1.10947	2.50171	1.32536	-1.67436	-0.809322	0.749481	0.685085	2.06066	1.04563	0.395929	-0.0401189	1.19213	0.66474	1.03336	0.418355	2.16047	1.08476	2.04253	1.30486	2.04499	0.93378	2.03568	1.35887	1.54512	0.26607	-1.66268	-1.07349	2.47876	1.3741
387509	GPR153	G protein-coupled receptor 153	1.30363	0.395725	0.193004	-0.284034	0.926803	0.724859	0	0.0220105	1.06917	0.286102	0.758499	0.291428	1.53116	1.12913	0.547932	-0.0512828	1.50144	0.66226	0.874793	0.514489	1.92647	0.859151	0.966045	0.39855	1.63823	0.362963	-1.05776	-0.712517	1.65296	0.85803
151556	GPR155	G protein-coupled receptor 155	0.118272	-0.454677	0	-0.418577	-3.32441	-1.78254	-2.57099	-2.25257	2.2485	1.18953	1.54418	1.00988	1.01658	0.424276	0	-0.581393	0	-0.300311	1.59483	1.00184	2.01019	0.911867	0.456421	-0.0589892	0.223194	-1.10957	-0.78576	-0.55021	-1.51043	-1.11888
165829	GPR156	G protein-coupled receptor 156	2.339	1.13853	1.21695	0.429757	-2.87529	-1.51764	0.53943	0.49925	0.114432	-0.445271	1.11261	0.615241	-1.52774	-3.06089	1.39593	0.769133	-0.217343	-0.439649	-0.0139086	-0.0870199	2.33748	1.11794	1.24031	0.644783	1.09766	-0.199571	-3.32193	-2.06361	-2.0923	-1.48251
80045	GPR157	G protein-coupled receptor 157	1.5304	0.558416	0.965034	0.254147	-1.40637	-0.651261	-0.0613765	-0.03229	1.53996	0.646754	0.173536	-0.243483	1.20923	0.688158	0	-0.581393	1.50963	0.667509	1.16829	0.71314	1.5418	0.616948	0.804435	0.253457	2.39312	1.14853	1.13171	0.593996	0.66439	0.24024
57512	GPR158	G protein-coupled receptor 158	-2.3348	-2.21457	1.78196	0.823624	-2.94361	-1.55793	-0.648275	-0.551526	1.42879	0.56159	0.173536	-0.243483	0.209228	-0.681626	0.547932	-0.0512828	-2.25622	-1.74677	-3.40927	-2.38513	1.22736	0.418957	1.03921	0.464238	1.72569	0.45398	-2.18784	-1.38687	-2.02379	-1.4397
26996	GPR160	G protein-coupled receptor 160	2.47241	1.23424	0.485864	-0.0798819	1.60071	1.12233	0.867138	0.789178	4.04658	2.56694	0.681171	0.220717	1.01658	0.424276	1.1646	0.545331	1.99866	0.98103	4.55334	3.00428	4.41733	2.42752	2.41304	1.69766	2.03055	0.771223	0.37485	0.142358	3.15353	1.79579
23432	GPR161	G protein-coupled receptor 161	0.740905	-0.00798537	3.55421	2.05906	-1.98958	-0.99524	-2.64205	-2.31544	1.80016	0.846076	1.2333	0.725607	0.209228	-0.681626	1.10047	0.483287	2.91965	1.57148	0.913212	0.540492	2.33153	1.1142	1.03921	0.464238	2.76751	1.53814	0.30187	0.0988084	3.11678	1.77282
27239	GPR162	G protein-coupled receptor 162	0.891996	0.100411	1.94658	0.938383	1.10095	0.827573	1.11137	1.00525	1.75375	0.810526	0.836501	0.362756	1.01658	0.424276	2.2849	1.62919	1.00833	0.346127	1.7632	1.1158	3.18196	1.64967	0.0409718	-0.431979	1.72569	0.45398	1.00961	0.521135	1.87669	0.997845
2840	GPR17	G protein-coupled receptor 17	1.66392	0.654209	0.999876	0.278435	1.27878	0.932459	1.56622	1.40766	1.68026	0.75423	0.910502	0.430425	1.01658	0.424276	0	-0.581393	-2.35119	-1.80766	1.82626	1.15848	1.37963	0.514837	-0.36081	-0.792698	0.808157	-0.500842	0	-0.0813257	0.427919	0.0924614
29909	GPR171	G protein-coupled receptor 171	1.76399	0.726	1.37832	0.542246	0.378319	0.40136	1.15278	1.04189	3.11905	1.85641	0.982452	0.496219	0.209228	-0.681626	0	-0.581393	1.43686	0.620856	3.71198	2.43481	3.34398	1.75169	1.4127	0.799556	1.33867	0.0512303	1.0764	0.560993	2.15979	1.17477
54328	GPR173	G protein-coupled receptor 173	1.5304	0.558416	1.30055	0.488031	0.548366	0.501654	1.64827	1.48026	1.5164	0.628705	1.23243	0.724808	1.19213	0.66474	1.34148	0.716456	1.40188	0.598429	1.52565	0.955018	1.12903	0.357048	0.178475	-0.308529	2.92363	1.7006	0.816183	0.405713	2.62339	1.46449
84636	GPR174	G protein-coupled receptor 174	0.141356	-0.438116	0.328623	-0.189494	0	0.178225	-2.77026	-2.42887	1.2043	0.389617	0.910502	0.430425	-2.32193	-4.14876	0.810966	0.203196	1.2886	0.525806	-2.96137	-2.08198	0.464605	-0.061308	0.178475	-0.308529	2.03055	0.771223	-1.67123	-1.07859	0.733156	0.283214
11245	GPR176	G protein-coupled receptor 176	1.46786	0.513547	0.70256	0.0711765	-1.48966	-0.700386	-1.05817	-0.914165	-0.827819	-1.16708	0.836501	0.362756	0	-0.968223	1.1646	0.545331	-2.66127	-2.00645	0.698998	0.395504	-0.867529	-0.900084	1.17768	0.588551	2.22319	0.971696	-2.63638	-1.65453	1.47682	0.747956
440435	GPR179	G protein-coupled receptor 179	-0.0131939	-0.548994	-0.357519	-0.667803	-4.98094	-2.75957	-2.37109	-2.07572	-2.22663	-2.23864	0.759713	0.292538	1.37915	0.920918	1.226	0.604734	2.31854	1.1861	-2.35044	-1.66848	0	-0.353846	0.806507	0.255317	0	-1.34184	-2.50574	-1.57657	-2.72177	-1.87589
2841	GPR18	G protein-coupled receptor 18	0.807932	0.0401017	1.12559	0.366071	1.33611	0.96627	1.07692	0.974775	0.753751	0.044478	1.44768	0.921645	1.53116	1.12913	1.10047	0.483287	0.390096	-0.0502211	0.67636	0.380182	1.66776	0.696254	-0.109429	-0.567009	1.09766	-0.199571	0	-0.0813257	1.48478	0.752928
160897	GPR180	G protein-coupled receptor 180	2.70711	1.40262	2.11057	1.0527	2.17732	1.46242	-0.199011	-0.154056	1.31951	0.477879	0.911594	0.431424	0.79419	0.119646	0.728504	0.123416	1.69887	0.78883	-1.33191	-0.979094	-0.819516	-0.869853	0.246222	-0.247706	2.03055	0.771223	1.91613	1.06208	1.43615	0.722538
11318	GPR182	G protein-coupled receptor 182	1.29336	0.388359	0.82124	0.153909	-1.33369	-0.608392	-1.80127	-1.5716	1.4842	0.604041	0.910502	0.430425	1.01658	0.424276	1.226	0.604734	1.31086	0.540082	0.206259	0.0619983	0.58242	0.0128738	0.887991	0.328473	2.16179	0.907801	0.580266	0.264935	1.19927	0.574503
1880	GPR183	G protein-coupled receptor 183	1.94544	0.856174	1.15602	0.387284	1.43189	1.02276	0.36191	0.342196	1.19522	0.382662	1.1749	0.672202	0.531156	-0.240654	1.4484	0.819893	1.60989	0.731787	-0.234612	-0.236401	0.61572	0.0338411	0.679741	0.141506	1.72569	0.45398	0.397592	0.155928	1.84913	0.980626
2842	GPR19	G protein-coupled receptor 19	1.66392	0.654209	2.2593	1.15638	1.51582	1.07227	-1.14456	-0.990597	1.88684	0.912479	0.980891	0.494792	1.53116	1.12913	1.34148	0.716456	2.15754	1.08289	1.35868	0.842001	2.8726	1.45488	-1.3452	-1.67648	1.88616	0.620966	1.16696	0.615032	1.98495	1.06551
2843	GPR20	G protein-coupled receptor 20	2.19198	1.03305	3.29062	1.87531	1.97388	1.34243	1.36179	1.2268	3.15061	1.88059	1.44844	0.922333	0.77135	0.0883605	2.4484	1.78737	2.39168	1.23299	2.11835	1.35618	4.36182	2.39257	1.99221	1.31984	1.96016	0.697973	2.12993	1.18966	2.50648	1.39143
2844	GPR21	G protein-coupled receptor 21	0.958492	0.148117	0.703018	0.0714961	0.994991	0.765076	0.869681	0.791427	1.665	0.742538	0.980891	0.494792	0.79419	0.119646	1.54793	0.916192	1.46239	0.637227	-2.31323	-1.64329	1.46215	0.566796	1.92516	1.25965	2.03055	0.771223	0.612327	0.284067	0.279579	-0.000241236
2845	GPR22	G protein-coupled receptor 22	1.892	0.817835	0	-0.418577	1.16499	0.865346	1.38934	1.25118	1.74962	0.807364	0.177175	-0.240155	1.20923	0.688158	1.96297	1.31773	0	-0.300311	0.398531	0.192136	2.10393	0.970891	1.47132	0.852187	0.638232	-0.677672	1.77976	0.980704	0.8115	0.332174
2848	GPR25	G protein-coupled receptor 25	1.30363	0.395725	3.11694	1.75423	0.846666	0.677593	0.844051	0.768752	0.656204	-0.0302473	1.04801	0.556163	0	-0.968223	1.54793	0.916192	2.27116	1.15573	0.319795	0.138844	2.33049	1.11354	1.11052	0.528262	0.808157	-0.500842	-0.673707	-0.483345	1.91856	1.02402
2849	GPR26	G protein-coupled receptor 26	0.652077	-0.0717127	-1.06209	-1.15896	-2.46465	-1.27544	1.45074	1.3055	0.682429	-0.0101575	1.34346	0.826339	0.209228	-0.681626	0.823122	0.214957	0	-0.300311	1.30587	0.806259	1.89331	0.838276	1.17768	0.588551	0	-1.34184	0.592752	0.272386	1.48478	0.752928
2850	GPR27	G protein-coupled receptor 27	1.85058	0.78812	0.687231	0.0604908	0.793357	0.646151	-0.447459	-0.373861	1.65157	0.732253	0.40632	-0.0306165	0.531156	-0.240654	1.226	0.604734	1.40773	0.602182	-1.78453	-1.28545	1.59354	0.649527	-0.374615	-0.805092	1.63823	0.362963	1.92688	1.0685	1.8115	0.957109
2827	GPR3	G protein-coupled receptor 3	1.4587	0.506976	-1.96266	-1.78674	0.00595508	0.181737	0.749481	0.685085	1.63872	0.722407	0.836501	0.362756	1.53116	1.12913	0.641041	0.0387982	1.34787	0.563807	0	-0.077606	-0.166375	-0.458604	0.806507	0.255317	1.09766	-0.199571	2.30883	1.29641	1.50458	0.765305
2853	GPR31	G protein-coupled receptor 31	1.26112	0.365233	0.86241	0.182608	-1.62775	-0.781834	0.534897	0.49524	1.53996	0.646754	0.495464	0.0509001	0	-0.968223	0.810966	0.203196	0.87646	0.261586	0	-0.077606	-0.374369	-0.589567	1.17848	0.589269	1.88616	0.620966	0.111481	-0.0148022	1.11422	0.521354
2854	GPR32	G protein-coupled receptor 32	2.25154	1.07578	1.1568	0.387828	0.793357	0.646151	0.305149	0.291979	0	-0.532931	0	-0.40217	1.37915	0.920918	0.152003	-0.434334	1.51506	0.670993	-1.18442	-0.879272	-0.629155	-0.749993	0	-0.468763	1.33867	0.0512303	-1.62226	-1.04937	-1.74808	-1.26739
2856	GPR33	G protein-coupled receptor 33 (gene/pseudogene)	0	-0.539528	0	-0.418577	0	0.178225	0	0.0220105	0	-0.532931	0	-0.40217	0	-0.968223	0	-0.581393	1.95736	0.954547	0	-0.077606	0	-0.353846	0	-0.468763	0.445587	-0.878145	0	-0.0813257	0	-0.17496
2857	GPR34	G protein-coupled receptor 34	1.02206	0.19372	-0.321727	-0.642852	0.164995	0.27554	-1.15278	-0.99787	-0.0666996	-0.584026	0.588574	0.136043	1.36397	0.900116	1.1646	0.545331	0.599697	0.084154	-2.10233	-1.50054	-0.711876	-0.802078	1.5752	0.945451	2.16179	0.907801	0.994768	0.51228	0.196747	-0.0520055
2859	GPR35	G protein-coupled receptor 35	0.192645	-0.40132	1.06547	0.32416	0.171868	0.279594	-0.272023	-0.218651	0	-0.532931	1.44844	0.922333	0.209228	-0.681626	0.0588937	-0.524415	1.98879	0.9747	1.24642	0.766024	1.51345	0.599097	0.419483	-0.0921521	-0.547488	-1.91157	-0.128156	-0.1578	1.43615	0.722538
2861	GPR37	G protein-coupled receptor 37 (endothelin receptor type B-like)	2.14707	1.00083	1.32763	0.506913	-0.877761	-0.339484	-0.138179	-0.100238	1.07248	0.288637	0.838226	0.364334	-0.0664274	-1.05921	2.34148	1.68393	-0.34964	-0.524465	-1.61438	-1.17028	1.58385	0.643426	1.36008	0.752316	1.44559	0.16249	0.0664356	-0.0416818	1.07772	0.498546
9283	GPR37L1	G protein-coupled receptor 37 like 1	1.46786	0.513547	3.00418	1.67564	1.10095	0.827573	1.07692	0.974775	1.80414	0.849129	0.495464	0.0509001	0	-0.968223	0.888969	0.278662	2.75768	1.46764	1.67636	1.05702	2.49422	1.21664	1.04097	0.465819	0.223194	-1.10957	-0.292247	-0.255717	1.88338	1.00203
2863	GPR39	G protein-coupled receptor 39	1.20847	0.327457	0.965543	0.254502	0.926803	0.724859	0.257793	0.250083	-0.784831	-1.13415	-0.698812	-1.04119	1.53116	1.12913	0.888969	0.278662	1.56325	0.701889	1.0162	0.610196	1.33932	0.489454	-0.936494	-1.30955	2.16179	0.907801	-1.82346	-1.16943	0.279579	-0.000241236
2828	GPR4	G protein-coupled receptor 4	1.85058	0.78812	0.929068	0.229075	0.793357	0.646151	0.268914	0.259922	1.2043	0.389617	0.676037	0.216022	0.531156	-0.240654	0.280108	-0.310396	-0.876508	-0.86224	-0.408716	-0.354241	-0.485886	-0.659783	1.24184	0.646158	1.33867	0.0512303	-1.94708	-1.2432	1.15979	0.549833
11250	GPR45	G protein-coupled receptor 45	2.05282	0.933213	-1.52356	-1.48065	0.558892	0.507862	0.243737	0.237647	0	-0.532931	-1.20163	-1.50099	1.20923	0.688158	1.1646	0.545331	1.60735	0.730158	1.63059	1.02605	-1.00526	-0.986804	0.965118	0.397718	0.96016	-0.342662	0.908237	0.460644	1.40702	0.704338
9248	GPR50	G protein-coupled receptor 50	0.763989	0.0085757	0.894058	0.20467	1.59305	1.11782	-0.0819079	-0.0504543	1.22787	0.407679	0.400605	-0.0358426	0	-0.968223	1.10047	0.483287	1.66993	0.770281	0.783985	0.453027	0.7489	0.117698	1.47002	0.851014	1.71621	0.444107	0.771075	0.378796	1.2564	0.61021
9293	GPR52	G protein-coupled receptor 52	2.11827	0.980171	0.402685	-0.137865	-1.27407	-0.573232	1.2581	1.13506	-0.744496	-1.10325	-1.48948	-1.7642	1.20923	0.688158	1.77032	1.13135	2.8832	1.5481	1.92361	1.22437	2.34979	1.1257	0	-0.468763	1.96016	0.697973	1.69727	0.931483	2.25402	1.23365
9290	GPR55	G protein-coupled receptor 55	0.0204641	-0.524847	0.380899	-0.153053	0.793357	0.646151	-0.749481	-0.641064	0.774217	0.0601563	1.63429	1.09229	0.531156	-0.240654	-0.226004	-0.800046	1.09821	0.403753	0.0283532	-0.0584154	-0.0970886	-0.414978	0	-0.468763	-1.54512	-2.94975	0.477275	0.203477	1.2564	0.61021
9289	GPR56	G protein-coupled receptor 56	-1.78395	-1.81938	-0.837971	-1.00273	-1.51814	-0.717184	-1.89968	-1.65866	1.68026	0.75423	-0.786255	-1.12115	0.79419	0.119646	0.728504	0.123416	1.83156	0.873897	-1.24642	-0.921236	-2.09217	-1.67118	-2.20581	-2.44913	0.96016	-0.342662	0.592752	0.272386	1.17475	0.559184
2830	GPR6	G protein-coupled receptor 6	0	-0.539528	1.09462	0.344481	0.278784	0.342653	1.8088	1.62228	0.00175619	-0.531586	0.289013	-0.137886	0.531156	-0.240654	1.226	0.604734	0	-0.300311	0.943192	0.560784	0.80025	0.15003	-1.80139	-2.08604	1.33867	0.0512303	0.0271902	-0.0651006	0	-0.17496
83873	GPR61	G protein-coupled receptor 61	1.10659	0.254366	0.573067	-0.019093	0.125232	0.252087	1.32521	1.19444	0.856679	0.123326	0	-0.40217	1.01658	0.424276	-1.34375	-1.88143	0.298081	-0.109212	-0.584517	-0.47323	0.578423	0.0103574	1.3629	0.754845	0	-1.34184	-1.85818	-1.19016	-0.406077	-0.428731
118442	GPR62	G protein-coupled receptor 62	1.66392	0.654209	1.32862	0.507604	0.641354	0.556499	1.17035	1.05743	0.146186	-0.420946	-1.70479	-1.96109	0.79419	0.119646	1.49902	0.868873	1.10544	0.408383	0.698998	0.395504	1.43458	0.549434	0	-0.468763	1.09766	-0.199571	0.37485	0.142358	1.90677	1.01664
81491	GPR63	G protein-coupled receptor 63	0.958492	0.148117	1.27315	0.468931	-2.79762	-1.47183	-0.345847	-0.283965	1.26595	0.436845	0.910502	0.430425	1.53116	1.12913	1.03336	0.418355	0.961046	0.315814	1.03411	0.622322	0.57188	0.00623739	-1.80139	-2.08604	1.80816	0.539793	-2.20954	-1.39982	1.7891	0.94311
10149	GPR64	G protein-coupled receptor 64	1.18644	0.311655	-0.909543	-1.05262	-2.27846	-1.16563	-1.28922	-1.11857	-0.701657	-1.07043	0.981412	0.495268	1.5175	1.11042	0.962969	0.350255	-1.31872	-1.14574	0.844471	0.493966	-1.52148	-1.31184	-1.3455	-1.67675	2.96016	1.73861	-1.84146	-1.18017	-1.39648	-1.04767
8477	GPR65	G protein-coupled receptor 65	1.12986	0.271061	0.430794	-0.118271	0.558892	0.507862	-2.74707	-2.40835	1.62526	0.712099	-0.00515403	-0.406883	1.37915	0.920918	1.68544	1.04922	0.782674	0.20146	-1.36793	-1.00347	0.0766626	-0.305576	0.716843	0.174817	0.96016	-0.342662	-3.34018	-2.0745	0.279579	-0.000241236
8111	GPR68	G protein-coupled receptor 68	1.77141	0.731321	0.643763	0.0301891	0.926803	0.724859	0.412064	0.386568	1.92373	0.940739	1.71786	1.1687	1.37915	0.920918	1.03336	0.418355	0.599697	0.084154	0.391136	0.187131	1.20406	0.404289	0.623587	0.0910913	2.49621	1.25581	0.477275	0.203477	-1.41916	-1.06184
10936	GPR75	G protein-coupled receptor 75	2.07097	0.946233	1.50342	0.629455	-1.26081	-0.565407	0.865779	0.787975	1.2043	0.389617	1.17354	0.670953	1.01658	0.424276	1.2849	0.661713	1.6526	0.759169	-1.14235	-0.850791	2.20491	1.03447	1.23954	0.644095	1.33867	0.0512303	-2.21761	-1.40463	1.45663	0.735337
27201	GPR78	G protein-coupled receptor 78	1.12986	0.271061	1.06523	0.323995	0.372364	0.397847	1.49577	1.34533	0.589031	-0.081705	0.0480054	-0.358272	0.209228	-0.681626	0	-0.581393	0.594574	0.0808697	0.135166	0.0138795	2.08833	0.961067	1.5752	0.945451	0.96016	-0.342662	1.22699	0.650855	1.43615	0.722538
27197	GPR82	G protein-coupled receptor 82	0	-0.539528	1.09648	0.34578	1.11171	0.833921	1.30944	1.18049	-0.365295	-0.812765	0.395929	-0.0401189	1.36397	0.900116	1.39593	0.769133	1.01984	0.353507	-0.431942	-0.369962	1.60808	0.658678	1.36079	0.752948	2.28209	1.03298	0.717853	0.347037	0.995785	0.44734
10888	GPR83	G protein-coupled receptor 83	0.486004	-0.190857	-1.47832	-1.44911	0	0.178225	1.39206	1.25358	0.561035	-0.103152	0	-0.40217	0.503704	-0.278257	1.59524	0.961959	0.589433	0.0775736	0.244188	0.0876705	2.13618	0.991193	0	-0.468763	0	-1.34184	-1.52134	-0.98915	0.0617116	-0.136394
53831	GPR84	G protein-coupled receptor 84	1.70323	0.682413	0.999627	0.278261	1.78889	1.23332	0.361793	0.342093	0.127218	-0.435476	1.79803	1.24201	0.79419	0.119646	1.03336	0.418355	1.44826	0.628168	-0.0283532	-0.0967965	1.30835	0.469955	0.622411	0.0900361	2.22319	0.971696	0.816183	0.405713	2.1448	1.1654
54329	GPR85	G protein-coupled receptor 85	-0.557939	-0.939807	0.09497	-0.352373	0.922734	0.722459	1.68983	1.51702	1.80414	0.849129	1.5896	1.05142	1.5175	1.11042	1.77032	1.13135	1.25976	0.507318	1.98016	1.26264	1.66486	0.694432	0	-0.468763	1.54512	0.26607	1.63518	0.89443	-2.21414	-1.55865
53836	GPR87	G protein-coupled receptor 87	2.81153	1.47753	1.7213	0.781336	0	0.178225	-0.464844	-0.389242	3.67952	2.28576	0.398269	-0.037979	0	-0.968223	0.100473	-0.484188	1.7759	0.838217	3.82494	2.51126	3.26403	1.70134	1.5201	0.895981	0.638232	-0.677672	1.94445	1.07898	2.17223	1.18254
54112	GPR88	G protein-coupled receptor 88	-1.71491	-1.76984	0.617643	0.0119812	-2.22775	-1.13572	1.18771	1.07279	0.139891	-0.425768	0.758499	0.291428	0.77135	0.0883605	0.728504	0.123416	1.02746	0.358394	0.962032	0.573536	1.46726	0.570011	0	-0.468763	0.638232	-0.677672	1.45976	0.789752	0.297757	0.011119
51463	GPR89B	G protein-coupled receptor 89B	2.29336	1.10578	2.69766	1.46196	-2.3452	-1.20499	0	0.0220105	0.31639	-0.290561	0	-0.40217	0	-0.968223	0	-0.581393	2.61271	1.37469	1.62939	1.02523	2.29933	1.09392	0	-0.468763	1.63823	0.362963	1.37608	0.739821	1.61411	0.833752
222487	GPR97	G protein-coupled receptor 97	-2.07715	-2.02972	-0.215022	-0.568468	1.05267	0.799097	0.673134	0.61754	0.479227	-0.165821	0	-0.40217	0.79419	0.119646	1.226	0.604734	0.778162	0.198568	0	-0.077606	-0.61398	-0.740438	0.017702	-0.452871	0.808157	-0.500842	-1.4685	-0.957623	0.66439	0.24024
84059	GPR98	G protein-coupled receptor 98	-2.81716	-2.56062	-3.89731	-3.13539	-4.97098	-2.75369	-2.14792	-1.87828	-2.56146	-2.49514	1.40061	0.878593	0.209228	-0.681626	-1.37056	-1.90738	-4.62493	-3.26535	-3.14082	-2.20344	-1.63011	-1.38024	0.0695409	-0.40633	0.445587	-0.878145	-6.58261	-4.00935	-4.05207	-2.70724
9052	GPRC5A	G protein-coupled receptor, class C, group 5, member A	1.78613	0.741883	-0.0393321	-0.445995	0.274969	0.340403	-2.52135	-2.20866	1.19825	0.384985	0.289013	-0.137886	0	-0.968223	0.448396	-0.147581	1.29083	0.527241	0.499705	0.260614	2.63786	1.30708	-0.915184	-1.29041	0.96016	-0.342662	-0.883945	-0.6088	-2.11055	-1.49391
51704	GPRC5B	G protein-coupled receptor, class C, group 5, member B	1.64789	0.642709	1.96287	0.949734	1.16499	0.865346	-0.916361	-0.788704	1.43908	0.569474	0.911048	0.430925	1.66866	1.31748	1.39593	0.769133	1.23009	0.488297	1.16829	0.71314	1.01463	0.285011	1.36079	0.752948	1.63823	0.362963	0.892312	0.451141	-0.439821	-0.449819
55890	GPRC5C	G protein-coupled receptor, class C, group 5, member C	-1.13548	-1.35415	1.35203	0.523924	-1.63421	-0.785644	0.597233	0.55039	1.80812	0.852175	1.49656	0.966335	1.20923	0.688158	1.64104	1.00627	1.5791	0.712045	-0.671751	-0.532274	0.423186	-0.0873879	1.47002	0.851014	2.22319	0.971696	-0.624656	-0.454075	2.22093	1.21297
55507	GPRC5D	G protein-coupled receptor, class C, group 5, member D	0	-0.539528	-0.961373	-1.08875	0.93086	0.727252	-1.24157	-1.07642	1.43137	0.563566	1.11214	0.614807	0	-0.968223	1.34148	0.716456	1.28532	0.523706	2.36967	1.52628	2.18039	1.01903	0.210347	-0.279914	1.33867	0.0512303	0	-0.0813257	-1.02478	-0.815382
222545	GPRC6A	G protein-coupled receptor, class C, group 6, member A	0.971431	0.1574	0.480626	-0.0835333	0.378319	0.40136	0.556141	0.514035	0	-0.532931	0.0480054	-0.358272	0	-0.968223	0	-0.581393	-3.84327	-2.76423	-0.102761	-0.147159	0	-0.353846	-2.42926	-2.64975	1.22319	-0.0689394	-1.47216	-0.959802	-2.01214	-1.43242
57655	GRAMD1A	GRAM domain containing 1A	1.88518	0.812942	2.14207	1.07466	1.551	1.09302	1.48176	1.33294	1.62301	0.710371	1.28943	0.776934	1.01658	0.424276	0	-0.581393	0.487688	0.0123452	1.96894	1.25505	3.13001	1.61696	1.71739	1.07311	2.20945	0.957397	1.63164	0.892319	2.90972	1.64343
57476	GRAMD1B	GRAM domain containing 1B	0.733932	-0.0129881	0.243966	-0.248508	-1.04633	-0.438908	0.41816	0.391961	0.852835	0.120382	0.289854	-0.137117	1.87795	1.60416	2.13289	1.48213	1.74369	0.817569	-2.51699	-1.78121	1.4521	0.560464	1.17768	0.588551	0	-1.34184	1.02719	0.531627	1.05103	0.481868
54762	GRAMD1C	GRAM domain containing 1C	2.12408	0.984336	0.642465	0.0292845	-2.32599	-1.19366	-0.135235	-0.0976336	0.627911	-0.0519213	0.676679	0.21661	0.531156	-0.240654	-1.40599	-1.94165	1.61243	0.733413	1.56888	0.984276	1.48218	0.579406	0.966045	0.39855	2.03055	0.771223	-1.34215	-0.882225	1.38582	0.691088
196996	GRAMD2	GRAM domain containing 2	1.334	0.417516	1.12684	0.366944	-1.69377	-0.820769	1.05817	0.958186	1.72905	0.791607	1.0485	0.556618	0	-0.968223	0.962969	0.350255	0.945034	0.305549	1.36296	0.844902	0.914789	0.22215	0.804435	0.253457	1.09766	-0.199571	-0.536721	-0.401602	-0.327634	-0.379709
65983	GRAMD3	GRAM domain containing 3	0.334001	-0.299908	-1.36393	-1.36937	-0.492114	-0.112027	-0.996847	-0.859911	0.146186	-0.420946	3.13582	2.46534	0.405835	-0.412317	1.10047	0.483287	1.99658	0.979694	-0.457571	-0.387308	-1.31559	-1.1822	0.670314	0.133044	0.638232	-0.677672	0.908237	0.460644	0.8115	0.332174
2890	GRIA1	glutamate receptor, ionotropic, AMPA 1	-2.35686	-2.2304	-1.83425	-1.69723	-1.84577	-0.910421	1.11371	1.00732	-2.07759	-2.12446	3.19736	2.52161	0.365193	-0.467987	0.641041	0.0387982	-1.95114	-1.55119	-1.45901	-1.06512	0.780727	0.137737	1.71739	1.07311	1.33867	0.0512303	-4.30194	-2.64841	0.427919	0.0924614
2891	GRIA2	glutamate receptor, ionotropic, AMPA 2	0.93226	0.129298	1.18768	0.409354	-1.97205	-0.984903	-0.749481	-0.641064	0.146186	-0.420946	0	-0.40217	1.01658	0.424276	0.736966	0.131603	-4.38152	-3.1093	-3.53383	-2.46944	1.38773	0.519939	0	-0.468763	0	-1.34184	-3.49999	-2.16986	-2.71122	-1.86929
2892	GRIA3	glutamate receptor, ionotropic, AMPA 3	0.293359	-0.329065	-2.05979	-1.85445	-3.4735	-1.87047	-0.678072	-0.577887	1.05251	0.27334	0.982971	0.496694	1.01658	0.424276	-0.845566	-1.39946	-1.41677	-1.2086	1.16829	0.71314	1.3055	0.468162	1.47197	0.852773	1	-0.301203	-2.32193	-1.46688	-0.572757	-0.532895
2893	GRIA4	glutamate receptor, ionotropic, AMPA 4	-2.41774	-2.27407	-0.571059	-0.816661	-3.52368	-1.90007	-1.23979	-1.07485	-2.52764	-2.46923	1.17399	0.67137	1.87795	1.60416	1.4484	0.819893	-2.2007	-1.71118	-2.0276	-1.44996	1.39265	0.523033	-0.0232698	-0.489655	0.652077	-0.663265	-2.82326	-1.76604	-4.97089	-3.28144
2894	GRID1	glutamate receptor, ionotropic, delta 1	0.503926	-0.178	1.32743	0.506775	-2.29726	-1.17671	-1.59723	-1.39108	1.85284	0.88643	0.289013	-0.137886	-2.86439	-4.89182	-1.51937	-2.05135	-2.66452	-2.00853	0.187957	0.0496107	1.39043	0.521633	-0.378227	-0.808335	0.808157	-0.500842	-3.11675	-1.94118	1.3943	0.696383
2895	GRID2	glutamate receptor, ionotropic, delta 2	-2.55037	-2.36922	0	-0.418577	-4.72143	-2.60651	0.727288	0.66545	0.00175619	-0.531586	0	-0.40217	0.79419	0.119646	1.2849	0.661713	-4.3293	-3.07582	-0.81663	-0.630334	-1.02159	-0.997086	0.415418	-0.0958024	1.44559	0.16249	-1.24239	-0.822693	-3.59385	-2.42088
2897	GRIK1	glutamate receptor, ionotropic, kainate 1	0.20847	-0.389967	1.15758	0.388373	-2.27398	-1.16298	-1.43629	-1.24869	-3.78531	-3.43266	0	-0.40217	0.997028	0.39749	1.03336	0.418355	-3.16435	-2.32897	0.900553	0.531925	0.361894	-0.12598	0.623587	0.0910913	1.80816	0.539793	-2.74875	-1.72158	-1.38954	-1.04333
2898	GRIK2	glutamate receptor, ionotropic, kainate 2	0.710493	-0.0298032	-2.3175	-2.0341	-4.78931	-2.64654	0.749481	0.685085	-2.56272	-2.4961	-1.83833	-2.0832	0	-0.968223	1.03336	0.418355	-1.06638	-0.983969	-2.46076	-1.74315	1.61454	0.662745	-2.4848	-2.69961	1.44559	0.16249	-3.66287	-2.26706	1.31136	0.644556
2899	GRIK3	glutamate receptor, ionotropic, kainate 3	-2.43396	-2.28571	-2.12973	-1.90321	-2.48825	-1.28936	1.4217	1.2798	0.479227	-0.165821	0.980891	0.494792	1.20923	0.688158	0	-0.581393	-2.83793	-2.11971	-2.90268	-2.04226	2.17707	1.01694	1.41948	0.805646	1.33867	0.0512303	-2.78091	-1.74077	0.792223	0.320127
2900	GRIK4	glutamate receptor, ionotropic, kainate 4	1.15276	0.28749	-1.35435	-1.36269	-1.58219	-0.754964	1.03917	0.941378	0.37116	-0.248605	0.837076	0.363282	1.63109	1.26602	1.77032	1.13135	-1.24424	-1.09799	0.866297	0.508738	1.86132	0.818132	0	-0.468763	-0.514573	-1.87732	-4.05653	-2.50197	1.38582	0.691088
2901	GRIK5	glutamate receptor, ionotropic, kainate 5	1.54778	0.570886	1.32704	0.506499	-1.82826	-0.900093	1.62067	1.45583	0.260155	-0.33364	1.0485	0.556618	0.79419	0.119646	-1.20645	-1.7486	-0.616784	-0.695731	-1.44403	-1.05498	1.86906	0.823005	1.17848	0.589269	1.96016	0.697973	0	-0.0813257	0.302663	0.0141845
2902	GRIN1	glutamate receptor, ionotropic, N-methyl D-aspartate 1	-2.26111	-2.1617	0.430609	-0.1184	1.45743	1.03783	1.43892	1.29504	2.09523	1.07212	0	-0.40217	0.531156	-0.240654	1.59524	0.961959	2.02936	1.00071	0.044621	-0.0474047	2.02851	0.923403	1.66926	1.0299	0	-1.34184	-2.31232	-1.46115	1.00722	0.454486
2903	GRIN2A	glutamate receptor, ionotropic, N-methyl D-aspartate 2A	1.412	0.473477	-1.35408	-1.3625	-3.67557	-1.98965	-1.25763	-1.09063	0.474231	-0.169647	1.6333	1.09138	0.79419	0.119646	1.54793	0.916192	-1.82049	-1.46742	-1.22928	-0.90963	-0.452596	-0.638822	-1.05062	-1.41201	1.63823	0.362963	-5.01222	-3.07225	-2.12881	-1.50533
2904	GRIN2B	glutamate receptor, ionotropic, N-methyl D-aspartate 2B	1.03444	0.202604	-2.48662	-2.152	-2.57995	-1.34345	1.2581	1.13506	-1.56757	-1.73377	1.63297	1.09107	0	-0.968223	-0.606781	-1.16844	-2.32193	-1.7889	-1.82736	-1.31444	0.0882736	-0.298265	-0.537187	-0.951049	1.96016	0.697973	-2.70075	-1.69294	1.2564	0.61021
2905	GRIN2C	glutamate receptor, ionotropic, N-methyl D-aspartate 2C	1.65593	0.648475	2.45366	1.29186	1.37236	0.987654	1.05817	0.958186	1.72695	0.789999	0.0509831	-0.35555	0.79419	0.119646	1.85049	1.20891	1.85118	0.886478	2.48355	1.60336	2.12058	0.981372	0.0303767	-0.441491	1.72569	0.45398	1.60001	0.873444	0.643028	0.22689
2906	GRIN2D	glutamate receptor, ionotropic, N-methyl D-aspartate 2D	2.60702	1.33081	1.06086	0.320949	-1.29033	-0.582818	0.297958	0.285618	1.54235	0.648584	0.588574	0.136043	0	-0.968223	-0.448396	-1.0152	1.79836	0.852612	-0.208779	-0.218916	1.22833	0.419569	1.24107	0.645471	1.22319	-0.0689394	1.29678	0.692498	1.56767	0.804732
116443	GRIN3A	glutamate receptor, ionotropic, N-methyl-D-aspartate 3A	0.822287	0.0504005	1.4562	0.596536	-1.97283	-0.985365	1.35902	1.22435	1.05585	0.275904	0.395929	-0.0401189	1.66866	1.31748	0.962969	0.350255	-3.37689	-2.46523	-0.486841	-0.407119	1.34488	0.492955	-0.652097	-1.05422	2.09766	0.841064	-5.43224	-3.32289	-1.28543	-0.97827
116444	GRIN3B	glutamate receptor, ionotropic, N-methyl-D-aspartate 3B	0	-0.539528	-0.346446	-0.660084	-1.96814	-0.982595	-0.49195	-0.413223	1.00868	0.239768	0.173536	-0.243483	1.01658	0.424276	1.4484	0.819893	-1.35739	-1.17053	1.17803	0.719729	-1.33563	-1.19482	0.717944	0.175805	2.03055	0.771223	0.477275	0.203477	0.927425	0.40462
2907	GRINA	glutamate receptor, ionotropic, N-methyl D-aspartate-associated protein 1 (glutamate binding)	3.20025	1.75641	3.94185	2.32928	3.6334	2.32123	1.13824	1.02902	3.83973	2.40849	1.9748	1.40366	1.19213	0.66474	2.32193	1.66501	2.94511	1.58779	2.69978	1.74971	3.98153	2.15312	3.3868	2.5719	2.63823	1.4036	2.8402	1.6135	2.88426	1.62752
2911	GRM1	glutamate receptor, metabotropic 1	-2.39097	-2.25487	-1.99488	-1.8092	0.454617	0.446361	1.50964	1.3576	-2.37617	-2.35319	0.495464	0.0509001	1.53116	1.12913	1.59524	0.961959	-3.45772	-2.51705	1.43146	0.891266	1.58318	0.643	-2.72502	-2.91528	2.49621	1.25581	-2.54094	-1.59757	-2.68549	-1.85322
2912	GRM2	glutamate receptor, metabotropic 2	-0.855946	-1.1536	0.380899	-0.153053	0.171868	0.279594	0.925999	0.841253	0.494109	-0.15442	-2.43178	-2.62588	1.53116	1.12913	1.54793	0.916192	1.23668	0.492523	-0.691725	-0.545793	0.534819	-0.0170978	0.625934	0.0931991	0.96016	-0.342662	-2.50574	-1.57657	-1.16047	-0.900177
2913	GRM3	glutamate receptor, metabotropic 3	-2.514	-2.34313	-1.61433	-1.54392	-1.02775	-0.427946	1.28324	1.1573	-2.15739	-2.1856	0.91214	0.431924	1.37915	0.920918	-0.551604	-1.11506	-0.932966	-0.898435	-0.612936	-0.492466	1.62661	0.670348	0.0303767	-0.441491	0.223194	-1.10957	-3.01222	-1.8788	-4.91134	-3.24423
2914	GRM4	glutamate receptor, metabotropic 4	0	-0.539528	1.59503	0.693318	0.460243	0.449679	1.01641	0.921237	0.584403	-0.0852507	0	-0.40217	0	-0.968223	0.547932	-0.0512828	-1.19124	-1.06401	0	-0.077606	2.21672	1.04191	0.966045	0.39855	0.445587	-0.878145	-1.69838	-1.09479	-1.43862	-1.074
2915	GRM5	glutamate receptor, metabotropic 5	-0.513996	-0.908281	-1.64049	-1.56216	-1.86926	-0.924277	1.85692	1.66485	0.973715	0.212981	1.49619	0.966002	2.10703	1.91795	-0.510962	-1.07574	-1.63066	-1.34572	-0.810182	-0.62597	2.35555	1.12932	1.03657	0.461864	0.445587	-0.878145	-2.21371	-1.40231	-2.58781	-1.79217
2916	GRM6	glutamate receptor, metabotropic 6	0.141356	-0.438116	0.964141	0.253525	-3.43688	-1.84887	0.450742	0.420787	0.265947	-0.329203	1.01697	0.527785	1.01658	0.424276	-1.46728	-2.00095	-1.43159	-1.2181	-2.45016	-1.73597	0.530953	-0.0195321	1.10801	0.526002	1.54512	0.26607	-1.04502	-0.704915	-1.89282	-1.35785
2917	GRM7	glutamate receptor, metabotropic 7	2.08294	0.954822	0.855842	0.17803	-1.97263	-0.985245	1.60783	1.44448	-3.39022	-3.13	-1.72361	-1.9783	1.01658	0.424276	1.68544	1.04922	-3.20537	-2.35527	-2.32771	-1.65309	2.13348	0.989499	0.888969	0.329351	1.88616	0.620966	-5.50059	-3.36368	-1.86367	-1.33963
2918	GRM8	glutamate receptor, metabotropic 8	0.0948133	-0.471507	-2.45101	-2.12717	-3.05801	-1.62541	0.894863	0.813706	-2.40255	-2.3734	1.1749	0.672202	0.930601	0.306499	1.88897	1.24614	-2.31472	-1.78428	1.67636	1.05702	2.52109	1.23355	-0.286304	-0.725807	1.09766	-0.199571	-2.79091	-1.74674	-1.33697	-1.01048
2925	GRPR	gastrin-releasing peptide receptor	0.905543	0.11013	1.21599	0.429085	1.15043	0.856755	0.513169	0.476017	-0.703413	-1.07178	1.11261	0.615241	0.77135	0.0883605	0.341481	-0.251019	0	-0.300311	-0.362372	-0.322874	0.348698	-0.134289	1.92373	1.25836	1.80816	0.539793	0	-0.0813257	0.842956	0.351832
100289187	GS1-259H13.2	transmembrane protein 225-like	NA	NA	NA	NA	NA	NA	NA	NA	NA	NA	NA	NA	NA	NA	NA	NA	NA	NA	NA	NA	NA	NA	NA	NA	NA	NA	NA	NA	NA	NA
146395	GSG1L	GSG1-like	1.04672	0.211413	1.75997	0.808292	-2.48574	-1.28788	-0.932801	-0.803249	0	-0.532931	0	-0.40217	1.01658	0.424276	1.226	0.604734	-2.19362	-1.70664	1.11259	0.675443	1.43718	0.551074	1.62417	0.989417	1.09766	-0.199571	0.592752	0.272386	1.57738	0.810797
220158	GTSCR1	Gilles de la Tourette syndrome chromosome region, candidate 1 (non-protein coding)	-0.430862	-0.848639	NA	NA	NA	NA	NA	NA	-1.13951	-1.40585	0	-0.40217	0	-0.968223	NA	NA	0	-0.300311	-0.260152	-0.253687	-0.636362	-0.75453	-0.608232	-1.01483	0	-1.34184	NA	NA	0	-0.17496
2984	GUCY2C	guanylate cyclase 2C (heat stable enterotoxin receptor)	0	-0.539528	0.328623	-0.189494	-2.20558	-1.12264	-2.21981	-1.94188	0	-0.532931	0	-0.40217	0.531156	-0.240654	1.54793	0.916192	0.961046	0.315814	1.43077	0.890797	-2.18813	-1.7316	-0.508697	-0.92547	0.96016	-0.342662	-4.76168	-2.92275	-2.41061	-1.68143
3000	GUCY2D	guanylate cyclase 2D, membrane (retina-specific)	-1.3287	-1.49277	0.38109	-0.152919	-2.24953	-1.14856	0.865779	0.787975	-0.937091	-1.25079	0.495464	0.0509001	1.36397	0.900116	0	-0.581393	0.520474	0.0333638	0.339007	0.151847	0.681004	0.074947	-1.70134	-1.99622	2.22319	0.971696	0	-0.0813257	0.733156	0.283214
2986	GUCY2F	guanylate cyclase 2F, retinal	1.15276	0.28749	0.703018	0.0714961	-2.74758	-1.44232	0.133704	0.1403	0	-0.532931	1.76002	1.20725	1.20923	0.688158	1.10047	0.483287	-1.82935	-1.4731	-2.03192	-1.45289	0.353179	-0.131467	0.304006	-0.195827	0.96016	-0.342662	-1.0131	-0.685871	-1.67745	-1.22326
2993	GYPA	glycophorin A (MNS blood group)	0.891996	0.100411	0.820396	0.15332	-1.3132	-0.596311	-0.450742	-0.376766	0.146186	-0.420946	0.589939	0.137291	1.20923	0.688158	1.24101	0.619251	0	-0.300311	0.66334	0.371369	1.36876	0.50799	1.24184	0.646158	1.09766	-0.199571	0.539947	0.240876	0.614305	0.20894
2994	GYPB	glycophorin B (MNS blood group)	0.20847	-0.389967	-1.65421	-1.57172	0	0.178225	-0.0357041	-0.00957727	0	-0.532931	0	-0.40217	1.20923	0.688158	0.662965	0.0600089	0.509628	0.0264106	0.0683987	-0.0313109	1.02505	0.291577	0	-0.468763	0.445587	-0.878145	0.289127	0.0912045	0.11422	-0.10358
2995	GYPC	glycophorin C (Gerbich blood group)	0.822287	0.0504005	1.03305	0.301557	0.994991	0.765076	0.125531	0.133069	1.3223	0.48001	1.23243	0.724808	1.66866	1.31748	0.341481	-0.251019	1.02366	0.355954	0.763754	0.439333	0.915902	0.22285	-0.830295	-1.2142	1.44559	0.16249	1.36334	0.732218	0.733156	0.283214
2996	GYPE	glycophorin E (MNS blood group)	0.778786	0.0191914	0.930113	0.229803	0.93086	0.727252	0	0.0220105	0.387194	-0.236322	0.911594	0.431424	0.209228	-0.681626	0.222392	-0.366234	0.28542	-0.117329	-0.09906	-0.144654	1.36876	0.50799	1.41881	0.805038	0.96016	-0.342662	0.849557	0.425628	0	-0.17496
3036	HAS1	hyaluronan synthase 1	1.72632	0.698974	1.40475	0.56067	0.278784	0.342653	-0.869681	-0.747406	0.484204	-0.162007	0	-0.40217	1.37915	0.920918	0.251539	-0.338035	-3.33587	-2.43893	1.29105	0.796226	1.21321	0.410049	0	-0.468763	1.22319	-0.0689394	0	-0.0813257	1.17475	0.559184
3037	HAS2	hyaluronan synthase 2	-0.23304	-0.706716	3.44567	1.98339	-0.815358	-0.302679	0.491951	0.457245	0.567503	-0.0981962	1.44806	0.921989	2.10703	1.91795	2.79079	2.11862	-1.84195	-1.48118	2.53382	1.63738	1.88029	0.830078	2.06453	1.38477	3.28209	2.07362	-0.44996	-0.349829	2.40272	1.32658
3038	HAS3	hyaluronan synthase 3	1.90554	0.827554	0.380517	-0.153319	0.278784	0.342653	0.736966	0.674012	-0.741923	-1.10128	0.289854	-0.137117	0.531156	-0.240654	0.641041	0.0387982	0.949054	0.308126	-1.74268	-1.25712	-0.674585	-0.778597	-1.2863	-1.6236	2.49621	1.25581	-0.293031	-0.256185	-0.312603	-0.370316
26762	HAVCR1	hepatitis A virus cellular receptor 1	0.313823	-0.314384	-0.217591	-0.570259	1.05639	0.801291	-0.397681	-0.329823	0	-0.532931	2.11214	1.52924	0.382995	-0.443602	1.03336	0.418355	1.10544	0.408383	0	-0.077606	-0.715749	-0.804516	0.621235	0.0889801	1.44559	0.16249	-2.36082	-1.49009	-0.79662	-0.672794
84868	HAVCR2	hepatitis A virus cellular receptor 2	0.850576	0.0706958	0.573067	-0.019093	1.11528	0.836027	-2.85811	-2.50659	1.00868	0.239768	1.1631	0.661408	0.405835	-0.412317	1.34148	0.716456	0.504174	0.0229142	-1.29105	-0.951438	-0.845381	-0.886139	-0.850606	-1.23244	0.808157	-0.500842	0.239637	0.0616722	0	-0.17496
1839	HBEGF	heparin-binding EGF-like growth factor	0	-0.539528	1.18779	0.40943	-1.3147	-0.597192	0.932801	0.84727	0.593645	-0.0781707	3.15243	2.48053	0.628227	-0.107687	0.448396	-0.147581	0.953063	0.310696	-0.67636	-0.535393	1.43458	0.549434	0.716843	0.174817	1.54512	0.26607	0.923989	0.470044	1.67495	0.871776
27198	HCAR1	hydroxycarboxylic acid receptor 1	1.99062	0.888593	-1.00123	-1.11653	1.64135	1.14631	0.0269177	0.0458249	1.26595	0.436845	0	-0.40217	1.01658	0.424276	0.547932	-0.0512828	1.02366	0.355954	0.962032	0.573536	0.315661	-0.15509	1.84631	1.18885	0.808157	-0.500842	0.631641	0.295592	1.65737	0.860786
338442	HCAR2	hydroxycarboxylic acid receptor 2	1.88518	0.812942	0.858314	0.179753	1.17187	0.8694	1.20794	1.09069	1.32507	0.482138	0.495464	0.0509001	0.531156	-0.240654	0.888969	0.278662	0.791656	0.207218	0.698998	0.395504	1.31969	0.477094	1.10801	0.526002	1.09766	-0.199571	1.76786	0.973602	-1.53767	-1.1359
8843	HCAR3	hydroxycarboxylic acid receptor 3	2.08889	0.95909	1.15803	0.388683	1.22632	0.901514	1.09929	0.994569	1.2043	0.389617	0	-0.40217	1.37915	0.920918	0.888969	0.278662	1.23009	0.488297	-1.37707	-1.00966	0.962496	0.252188	1.03745	0.462656	0.445587	-0.878145	1.37485	0.739085	1.65737	0.860786
348980	HCN1	hyperpolarization activated cyclic nucleotide-gated potassium channel 1	-1.90822	-1.90853	-1.15987	-1.22712	-3.0161	-1.60069	-2.35867	-2.06473	-0.0601395	-0.579001	0.589257	0.136667	0	-0.968223	-0.981176	-1.53066	-1.83434	-1.47631	-1.51238	-1.10125	0.768327	0.12993	-2.6368	-2.83608	2.22319	0.971696	-3.16334	-1.96898	-2.56051	-1.77511
610	HCN2	hyperpolarization activated cyclic nucleotide-gated potassium channel 2	1.05889	0.220148	0.0471957	-0.385677	0.171868	0.279594	1.01758	0.922274	0.686754	-0.00684445	0	-0.40217	0.79419	0.119646	1.92644	1.28239	1.56587	0.703569	1.03411	0.622322	-0.461414	-0.644375	0.966971	0.399381	2.49621	1.25581	1.59275	0.869113	0.691963	0.257472
57657	HCN3	hyperpolarization activated cyclic nucleotide-gated potassium channel 3	2.78613	1.45931	3.45329	1.98871	1.78666	1.23201	1.24458	1.1231	1.88119	0.908151	1.2333	0.725607	1.37915	0.920918	1.4484	0.819893	1.34991	0.565115	2.9241	1.90154	2.9153	1.48177	1.71409	1.07014	2.63823	1.4036	3.12024	1.78061	3.11803	1.7736
10021	HCN4	hyperpolarization activated cyclic nucleotide-gated potassium channel 4	0.733932	-0.0129881	0.500296	-0.069821	0.0563912	0.211484	0.125531	0.133069	0.265947	-0.329203	0	-0.40217	0	-0.968223	0	-0.581393	-1.39187	-1.19264	-1.71186	-1.23626	1.6766	0.701823	0.887991	0.328473	1.22319	-0.0689394	-2.94973	-1.84151	-1.80581	-1.30347
3061	HCRTR1	hypocretin (orexin) receptor 1	1.39289	0.459768	0.894192	0.204763	0.372364	0.397847	1.22485	1.10565	1.48669	0.605943	0	-0.40217	0	-0.968223	1.54793	0.916192	1.22347	0.484052	1.43146	0.891266	1.15236	0.371736	1.8875	1.22583	0.223194	-1.10957	1.18014	0.622895	0.804988	0.328105
3062	HCRTR2	hypocretin (orexin) receptor 2	0	-0.539528	-2.1349	-1.90681	-1.39513	-0.644629	0	0.0220105	0.875291	0.137584	0	-0.40217	0	-0.968223	0.547932	-0.0512828	0.579095	0.070946	0.58208	0.316369	0.173141	-0.244828	0	-0.468763	0	-1.34184	-2.94846	-1.84075	-2.34845	-1.64259
10870	HCST	hematopoietic cell signal transducer	1.50393	0.539424	1.59437	0.692859	1.05267	0.799097	0.597233	0.55039	1.31393	0.473604	0.981412	0.495268	1.37915	0.920918	0.962969	0.350255	2.09291	1.04145	0.87248	0.512924	2.81164	1.4165	1.17687	0.587833	2.22319	0.971696	0.539947	0.240876	2.09861	1.13653
57493	HEG1	heart development protein with EGF-like domains 1	-0.852936	-1.15144	-3.59658	-2.92575	-2.19922	-1.11889	-0.914446	-0.78701	2.53862	1.41178	0.981932	0.495743	0.531156	-0.240654	0.962969	0.350255	-2.01698	-1.5934	2.29587	1.47633	2.42893	1.17553	1.71574	1.07163	1.63823	0.362963	0.699667	0.336185	-0.562652	-0.52658
220296	HEPACAM	hepatic and glial cell adhesion molecule	0	-0.539528	-1.82372	-1.68989	0	0.178225	-0.566219	-0.47893	0	-0.532931	0	-0.40217	1.33311	0.857843	1.85049	1.20891	0.259759	-0.13378	0.0827477	-0.021599	2.23983	1.05646	-1.68143	-1.97835	-0.808157	-2.18284	-1.87121	-1.19793	0.691963	0.257472
9843	HEPH	hephaestin	-1.14303	-1.35957	0.781453	0.126173	0.272402	0.338889	1.04122	0.943187	-2.03773	-2.09393	0.910502	0.430425	0.174831	-0.728742	1.49902	0.868873	-3.24148	-2.37842	-2.68313	-1.89366	-0.0316612	-0.373782	-1.17649	-1.52501	2.68263	1.4498	-4.84016	-2.96958	-3.35306	-2.2704
341208	HEPHL1	hephaestin-like 1	1.62351	0.625215	-2.42511	-2.10912	-3.74969	-2.03337	0	0.0220105	-1.85568	-1.95447	0	-0.40217	1.65625	1.30048	-1.59342	-2.12299	-2.34967	-1.80668	0	-0.077606	1.5539	0.624564	0.173669	-0.312844	0	-1.34184	1.35604	0.727859	-3.34725	-2.26677
64224	HERPUD2	HERPUD family member 2	2.56793	1.30277	0.93057	0.230122	3.364	2.16233	3.2935	2.9358	0.468574	-0.173981	1.71786	1.1687	-0.437877	-1.56802	2.49902	1.83635	3.33482	1.83763	-0.152178	-0.180606	-1.30971	-1.1785	1.38317	0.77304	1.22239	-0.0697737	-0.263936	-0.238824	-0.447747	-0.454772
3077	HFE	hemochromatosis	1.76399	0.726	1.30014	0.48775	0.324927	0.369869	-0.540568	-0.456236	1.14304	0.342694	0.910502	0.430425	1.01658	0.424276	1.49902	0.868873	1.60225	0.726891	-1.29456	-0.953819	-0.288852	-0.535721	1.11136	0.529014	0.96016	-0.342662	2.30726	1.29548	-1.1815	-0.91332
148738	HFE2	hemochromatosis type 2 (juvenile)	2.80793	1.47495	2.73845	1.49039	0.443299	0.439685	-1.01641	-0.877216	0.720388	0.0189208	0	-0.40217	1.37915	0.920918	1.77032	1.13135	3.01136	1.63027	1.66258	1.0477	2.05644	0.940985	0.29813	-0.201103	1.80816	0.539793	2.03694	1.13417	1.9848	1.06541
11148	HHLA2	HERV-H LTR-associating 2	-1.96803	-1.95144	0.431716	-0.117628	0.558892	0.507862	1.11371	1.00732	2.20863	1.15899	0.496193	0.0515662	1.20923	0.688158	1.226	0.604734	1.83373	0.875292	0.161377	0.0316203	2.10428	0.971109	0.805471	0.254387	0.808157	-0.500842	-2.91212	-1.81907	0.577377	0.185863
64645	HIAT1	hippocampus abundant transcript 1	1.24089	0.350717	-0.697837	-0.905038	-3.65608	-1.97815	-0.77267	-0.661579	0.376976	-0.244149	-0.495464	-0.855241	0.503704	-0.278257	-1.16993	-1.71327	-1.57881	-1.31249	-1.4317	-1.04664	-0.805809	-0.861223	-0.997965	-1.36473	0.289507	-1.04057	-2.40696	-1.51762	-1.78564	-1.29087
84641	HIATL1	hippocampus abundant transcript-like 1	0.536433	-0.154679	0.0436489	-0.388149	-1.08667	-0.462698	-0.84176	-0.722704	1.52819	0.637735	0.0937923	-0.316403	0.0696342	-0.872839	1.34148	0.716456	-0.216673	-0.43922	-1.33807	-0.983266	-1.99724	-1.6114	0.281413	-0.216111	2.96016	1.73861	0.699667	0.336185	0.484777	0.127994
51751	HIGD1B	HIG1 hypoxia inducible domain family, member 1B	1.44948	0.500362	-0.725848	-0.924564	1.16844	0.867375	-1.17035	-1.01341	1.32784	0.484261	1.0485	0.556618	1.37915	0.920918	0.226004	-0.36274	0.698867	0.147731	-0.483882	-0.405117	-1.33653	-1.19539	0.415037	-0.0961436	1.63823	0.362963	0.753552	0.368339	0.66439	0.24024
613227	HIGD1C	HIG1 hypoxia inducible domain family, member 1C	1.43086	0.487007	0.0961341	-0.351562	0	0.178225	0	0.0220105	0.133568	-0.430612	1.49546	0.965336	0.79419	0.119646	1.68544	1.04922	0.272646	-0.125518	0	-0.077606	0.0581842	-0.317211	0.415418	-0.0958024	2.44559	1.20313	-2.32193	-1.46688	0.444331	0.102718
29923	HILPDA	hypoxia inducible lipid droplet-associated	1.77879	0.736615	1.87657	0.889576	1.82463	1.2544	3.12152	2.78365	1.3223	0.48001	1.58994	1.05173	0.34039	-0.501962	2.10047	1.45076	2.08549	1.03669	2.23872	1.43765	3.01403	1.54394	1.24107	0.645471	2.16179	0.907801	2.3676	1.33149	1.76299	0.926794
3105	HLA-A	major histocompatibility complex, class I, A	0	-0.539528	1.45556	0.596093	-3.8986	-2.1212	-0.450742	-0.376766	-5.12928	-4.46221	NA	NA	0	-0.968223	1.4484	0.819893	-3.32193	-2.43	-4.32193	-3.00286	NA	NA	0	-0.468763	0	-1.34184	2.66951	1.51164	0	-0.17496
3106	HLA-B	major histocompatibility complex, class I, B	-3.32193	-2.92276	1.59487	0.693203	-2.08963	-1.05425	-0.953242	-0.821333	-4.90689	-4.29185	0	-0.40217	-2.32193	-4.14876	1.64104	1.00627	0	-0.300311	0	-0.077606	NA	NA	0	-0.468763	0	-1.34184	-0.849424	-0.5882	-2.32193	-1.62601
3107	HLA-C	major histocompatibility complex, class I, C	0	-0.539528	1.47929	0.612633	0.366384	0.39432	-0.865779	-0.743954	-3.90689	-3.5258	0	-0.40217	0	-0.968223	1.49902	0.868873	0	-0.300311	0	-0.077606	NA	NA	0	-0.468763	0	-1.34184	2.66951	1.51164	0	-0.17496
3111	HLA-DOA	major histocompatibility complex, class II, DO alpha	NA	NA	0.929852	0.229621	0.366384	0.39432	0.673134	0.61754	0	-0.532931	NA	NA	0	-0.968223	0.888969	0.278662	-2.32193	-1.7889	0	-0.077606	NA	NA	0	-0.468763	0	-1.34184	2.37335	1.33492	0	-0.17496
3113	HLA-DPA1	major histocompatibility complex, class II, DP alpha 1	0	-0.539528	0.873233	0.190152	-2.78577	-1.46484	-0.77267	-0.661579	0	-0.532931	0	-0.40217	0	-0.968223	1.2849	0.661713	0	-0.300311	0	-0.077606	NA	NA	0	-0.468763	0	-1.34184	2.04871	1.14119	0	-0.17496
3115	HLA-DPB1	major histocompatibility complex, class II, DP beta 1	0	-0.539528	0.969757	0.257439	-2.09546	-1.05769	-1.01641	-0.877216	0	-0.532931	0	-0.40217	0	-0.968223	0.962969	0.350255	0	-0.300311	0	-0.077606	NA	NA	0	-0.468763	0	-1.34184	1.57398	0.857913	0	-0.17496
3117	HLA-DQA1	major histocompatibility complex, class II, DQ alpha 1	0	-0.539528	1.12662	0.366786	0.460243	0.449679	0.325211	0.309728	0	-0.532931	0	-0.40217	0	-0.968223	0.810966	0.203196	0	-0.300311	0	-0.077606	NA	NA	0	-0.468763	0	-1.34184	1.74239	0.958405	0	-0.17496
3118	HLA-DQA2	major histocompatibility complex, class II, DQ alpha 2	0	-0.539528	0.964141	0.253525	0.784415	0.640877	0.566219	0.522951	0	-0.532931	0	-0.40217	0	-0.968223	0.810966	0.203196	-2.32193	-1.7889	0	-0.077606	NA	NA	0	-0.468763	0	-1.34184	2.05587	1.14547	0	-0.17496
3119	HLA-DQB1	major histocompatibility complex, class II, DQ beta 1	0	-0.539528	1.45502	0.595714	0.784415	0.640877	0.673134	0.61754	0	-0.532931	NA	NA	NA	NA	1.49902	0.868873	-2.32193	-1.7889	0	-0.077606	NA	NA	0	-0.468763	0	-1.34184	1.97304	1.09604	0	-0.17496
3122	HLA-DRA	major histocompatibility complex, class II, DR alpha	0	-0.539528	1.08951	0.340919	-2.45318	-1.26868	-0.125531	-0.0890481	0	-0.532931	0	-0.40217	0	-0.968223	-1.27663	-1.8165	0	-0.300311	0	-0.077606	NA	NA	0	-0.468763	0	-1.34184	-0.226355	-0.216398	0	-0.17496
3123	HLA-DRB1	major histocompatibility complex, class II, DR beta 1	0	-0.539528	1.32714	0.506568	-2.00171	-1.0024	0	0.0220105	0	-0.532931	0	-0.40217	0	-0.968223	1.2849	0.661713	0	-0.300311	-2.32193	-1.64918	NA	NA	0	-0.468763	0	-1.34184	1.79156	0.987748	0	-0.17496
3125	HLA-DRB3	major histocompatibility complex, class II, DR beta 3	NA	NA	NA	NA	NA	NA	NA	NA	NA	NA	NA	NA	NA	NA	NA	NA	NA	NA	NA	NA	NA	NA	NA	NA	NA	NA	NA	NA	NA	NA
3126	HLA-DRB4	major histocompatibility complex, class II, DR beta 4	NA	NA	NA	NA	NA	NA	NA	NA	NA	NA	NA	NA	NA	NA	NA	NA	NA	NA	NA	NA	NA	NA	NA	NA	NA	NA	NA	NA	NA	NA
3127	HLA-DRB5	major histocompatibility complex, class II, DR beta 5	0	-0.539528	1.17533	0.400747	0.324927	0.369869	-2.67056	-2.34066	0	-0.532931	-3.32193	-3.43986	0	-0.968223	1.49902	0.868873	0	-0.300311	0	-0.077606	NA	NA	0	-0.468763	0	-1.34184	1.88515	1.04359	0	-0.17496
3133	HLA-E	major histocompatibility complex, class I, E	0	-0.539528	-1.19786	-1.2536	0.709942	0.596953	-0.77267	-0.661579	0	-0.532931	0	-0.40217	0	-0.968223	-0.829173	-1.3836	0	-0.300311	0	-0.077606	NA	NA	0	-0.468763	0	-1.34184	2.4109	1.35732	0	-0.17496
3134	HLA-F	major histocompatibility complex, class I, F	0	-0.539528	1.5729	0.677889	1.04894	0.796898	0.241008	0.235233	0	-0.532931	0	-0.40217	0	-0.968223	1.54793	0.916192	0	-0.300311	0	-0.077606	NA	NA	0	-0.468763	0	-1.34184	2.44203	1.3759	0	-0.17496
3135	HLA-G	major histocompatibility complex, class I, G	0	-0.539528	1.27315	0.468931	1.2197	0.89761	-0.222392	-0.174743	0	-0.532931	0	-0.40217	0	-0.968223	1.59524	0.961959	0	-0.300311	0	-0.077606	NA	NA	0	-0.468763	0	-1.34184	1.74239	0.958405	0	-0.17496
81502	HM13	histocompatibility (minor) 13	0.910926	0.113992	-0.0568424	-0.458202	2.22452	1.49026	2.078	1.86044	2.54816	1.41908	2.20328	1.61259	0.997028	0.39749	1.68544	1.04922	2.47788	1.28826	2.82573	1.83496	3.3742	1.77072	1.52388	0.899376	2.28209	1.03298	1.83297	1.01246	2.92742	1.65449
3163	HMOX2	heme oxygenase (decycling) 2	0.736966	-0.0108114	3.03143	1.69463	1.33686	0.966714	0.142189	0.147807	1.2043	0.389617	1.71817	1.16899	0.79419	0.119646	1.10047	0.483287	2.48759	1.29448	-0.64519	-0.514296	-0.93604	-0.943222	1.67097	1.03143	2.16179	0.907801	1.7591	0.968378	1.23285	0.59549
51617	HMP19	HMP19 protein	-2.32193	-2.20533	1.40559	0.56126	0.793357	0.646151	-0.421697	-0.35107	0	-0.532931	NA	NA	NA	NA	0.810966	0.203196	-2.32193	-1.7889	0	-0.077606	NA	NA	0	-0.468763	NA	NA	0	-0.0813257	NA	NA
3249	HPN	hepsin	1.99062	0.888593	0.487616	-0.0786607	0.62642	0.547691	0.62298	0.573168	1.52555	0.635712	0.837076	0.363282	0.79419	0.119646	1.77032	1.13135	2.72389	1.44597	2.55226	1.64987	1.88752	0.834629	1.30181	0.699995	2.28209	1.03298	1.45976	0.789752	2.53948	1.41205
54979	HRASLS2	HRAS-like suppressor 2	0.539115	-0.152754	0.0954357	-0.352049	0.171868	0.279594	0	0.0220105	0.901576	0.157719	0.910502	0.430425	1.89917	1.63323	0	-0.581393	0.28542	-0.117329	0	-0.077606	0	-0.353846	1.03921	0.464238	0.638232	-0.677672	-1.41369	-0.924914	0	-0.17496
646962	HRCT1	histidine rich carboxyl terminus 1	2.11244	0.975989	2.14275	1.07513	0.265992	0.335109	0.675456	0.619594	2.17381	1.13231	1.04801	0.556163	1.37915	0.920918	1.1646	0.545331	0.689287	0.14159	2.67035	1.72979	1.2223	0.415773	1.47197	0.852773	1.33867	0.0512303	1.26459	0.673292	1.48478	0.752928
3269	HRH1	histamine receptor H1	3.02826	1.63302	-1.17482	-1.23754	0.636393	0.553573	-1.38934	-1.20716	1.33061	0.48638	-2.40682	-2.60305	0.209228	-0.681626	1.4484	0.819893	1.23339	0.490413	-1.15198	-0.857309	-0.135435	-0.439123	0.966971	0.399381	1.80816	0.539793	-2.09622	-1.3322	1.93623	1.03506
3274	HRH2	histamine receptor H2	1.04672	0.211413	-1.186	-1.24534	0.905242	0.712142	0.953242	0.865354	0.584403	-0.0852507	3.69345	2.97525	0.209228	-0.681626	0.226004	-0.36274	0.880956	0.264469	0.204743	0.0609724	0.926734	0.229671	1.17607	0.587114	1.54512	0.26607	-1.41129	-0.923481	1.17475	0.559184
11255	HRH3	histamine receptor H3	1.4587	0.506976	2.28472	1.1741	0.347636	0.383262	1.17035	1.05743	0.931041	0.180291	0.589257	0.136667	1.36397	0.900116	1.39593	0.769133	-0.0411669	-0.326703	0.053701	-0.041259	3.04315	1.56227	0.714639	0.172838	1.63823	0.362963	1.06748	0.555671	1.33796	0.661176
59340	HRH4	histamine receptor H4	1.32395	0.410303	0.701336	0.0703237	-3.24531	-1.73588	-0.020441	0.00392614	0.73299	0.0285741	0	-0.40217	0.79419	0.119646	1.34148	0.716456	-2.44133	-1.86544	-1.35095	-0.991985	1.13933	0.36353	0.966045	0.39855	1.54512	0.26607	1.6472	0.901603	1.20891	0.580527
9953	HS3ST3B1	heparan sulfate (glucosamine) 3-O-sulfotransferase 3B1	-0.293359	-0.749991	0.617643	0.0119812	-0.434396	-0.0779847	-0.869681	-0.747406	1.68026	0.75423	0.395929	-0.0401189	0.79419	0.119646	1.2849	0.661713	0.861879	0.252238	-0.262826	-0.255497	-0.823349	-0.872266	1.04097	0.465819	3.25294	2.04329	0.239637	0.0616722	0.385823	0.0661543
9394	HS6ST1	heparan sulfate 6-O-sulfotransferase 1	1.37353	0.445875	0.821522	0.154105	-1.33738	-0.610572	0.830075	0.756387	-1.02423	-1.31754	0.758499	0.291428	-1.52774	-3.06089	1.1646	0.545331	-0.688766	-0.741878	-2.63551	-1.86143	0.261986	-0.188887	-3.35632	-3.48206	0.445587	-0.878145	-0.562827	-0.41718	1.45663	0.735337
345275	HSD17B13	hydroxysteroid (17-beta) dehydrogenase 13	0.864516	0.0806961	0.273146	-0.228167	-2.50789	-1.30095	0.897097	0.815682	0	-0.532931	0	-0.40217	1.37915	0.920918	0.888969	0.278662	0.703633	0.150787	1.95264	1.24402	-0.610269	-0.738101	0.716843	0.174817	0.96016	-0.342662	-1.29858	-0.856224	0	-0.17496
3350	HTR1A	5-hydroxytryptamine (serotonin) receptor 1A, G protein-coupled	0.733932	-0.0129881	-0.204543	-0.561163	0	0.178225	1.32521	1.19444	0.484204	-0.162007	0.981412	0.495268	0	-0.968223	1.34148	0.716456	-3.40361	-2.48236	-2.6657	-1.88186	-1.05924	-1.02079	-1.45623	-1.77616	0	-1.34184	-3.3415	-2.07529	1.27958	0.624693
3351	HTR1B	5-hydroxytryptamine (serotonin) receptor 1B, G protein-coupled	0	-0.539528	0	-0.418577	0.299337	0.354776	-1.58229	-1.37786	1.48917	0.607841	1.44655	0.920611	0.531156	-0.240654	1.1646	0.545331	-1.58253	-1.31487	1.0162	0.610196	0.884258	0.202926	-0.837908	-1.22104	0.223194	-1.10957	0	-0.0813257	1.33368	0.658502
3352	HTR1D	5-hydroxytryptamine (serotonin) receptor 1D, G protein-coupled	1.94544	0.856174	0.661198	0.0423433	0.0563912	0.211484	1.09543	0.991151	0.852835	0.120382	0	-0.40217	0	-0.968223	0.810966	0.203196	-0.97502	-0.925395	1.59545	1.00226	0.480369	-0.0513827	1.11052	0.528262	1.88616	0.620966	-2.43558	-1.53471	0.626944	0.216839
3354	HTR1E	5-hydroxytryptamine (serotonin) receptor 1E, G protein-coupled	0.334001	-0.299908	1.35441	0.525583	0.0563912	0.211484	0.263034	0.25472	0	-0.532931	0	-0.40217	0	-0.968223	1.54793	0.916192	-2.50579	-1.90677	1.47079	0.917881	1.55946	0.628068	-2.83062	-3.01009	0.445587	-0.878145	-3.47156	-2.1529	2.03208	1.09496
3355	HTR1F	5-hydroxytryptamine (serotonin) receptor 1F, G protein-coupled	0.891996	0.100411	0.21695	-0.267342	1.27878	0.932459	0.10579	0.115604	-2.45791	-2.41581	0	-0.40217	1.36397	0.900116	1.34148	0.716456	-2.89235	-2.1546	-0.861711	-0.660847	1.57137	0.635565	0.418129	-0.0933677	2.22319	0.971696	-2.17672	-1.38023	-3.23423	-2.19614
3356	HTR2A	5-hydroxytryptamine (serotonin) receptor 2A, G protein-coupled	-0.764711	-1.08815	-1.32132	-1.33967	-0.549215	-0.145706	0.953242	0.865354	0.589031	-0.081705	0.0489986	-0.357364	1.20923	0.688158	1.34792	0.722689	0.496412	0.0179382	0.379203	0.179054	-0.0797249	-0.404045	-3.74792	-3.83364	1.44057	0.157272	-4.33175	-2.6662	0.279579	-0.000241236
3357	HTR2B	5-hydroxytryptamine (serotonin) receptor 2B, G protein-coupled	0.777608	0.0183462	0.335213	-0.1849	-1.41434	-0.655961	1.38934	1.25118	0	-0.532931	1.29069	0.778087	1.20923	0.688158	-0.226004	-0.800046	-1.81775	-1.46567	0	-0.077606	1.37963	0.514837	1.24184	0.646158	-1.22239	-2.6139	-1.18169	-0.786472	-1.36545	-1.02828
3358	HTR2C	5-hydroxytryptamine (serotonin) receptor 2C, G protein-coupled	1.15276	0.28749	1.06499	0.323829	1.42275	1.01737	0.450742	0.420787	1.92556	0.942142	0.294049	-0.133281	0.209228	-0.681626	1.54793	0.916192	0.487688	0.0123452	1.15198	0.702097	1.57611	0.638546	0	-0.468763	1.72569	0.45398	-1.7096	-1.10149	-0.689508	-0.605857
3359	HTR3A	5-hydroxytryptamine (serotonin) receptor 3A, ionotropic	0	-0.539528	0.821663	0.154203	0.553638	0.504764	0	0.0220105	0	-0.532931	0.911048	0.430925	1.63109	1.26602	1.64104	1.00627	0.949054	0.308126	1.78507	1.1306	1.25124	0.433994	-0.135279	-0.590217	-0.808157	-2.18284	-1.79281	-1.15114	0.915702	0.397294
9177	HTR3B	5-hydroxytryptamine (serotonin) receptor 3B, ionotropic	-3.39097	-2.97229	0	-0.418577	-0.971759	-0.394925	-0.175436	-0.1332	0.856679	0.123326	0	-0.40217	1.98715	1.75374	1.49902	0.868873	-2.48092	-1.89082	0.192836	0.0529132	1.33204	0.484871	0.370574	-0.136063	-0.36257	-1.71914	-2.52914	-1.59053	-2.44991	-1.70599
170572	HTR3C	5-hydroxytryptamine (serotonin) receptor 3C, ionotropic	1.39289	0.459768	0.217591	-0.266894	-1.44023	-0.671231	0.754667	0.689673	3.77188	2.35651	0.179898	-0.237665	0	-0.968223	-1.90138	-2.42093	1.05411	0.375477	3.81139	2.5021	1.00526	0.279112	0.0250498	-0.446274	2.16179	0.907801	-1.35121	-0.887629	-0.467171	-0.466911
200909	HTR3D	5-hydroxytryptamine (serotonin) receptor 3D, ionotropic	2.24089	1.06814	0.527932	-0.0505566	0.171868	0.279594	1.3852	1.24752	3.50412	2.15139	1.05148	0.55934	0.79419	0.119646	2.1646	1.51281	-0.46017	-0.595326	3.50072	2.29182	2.88427	1.46223	0.164008	-0.321517	1.72569	0.45398	-0.922834	-0.632006	2.48863	1.38027
285242	HTR3E	5-hydroxytryptamine (serotonin) receptor 3E, ionotropic	1.60702	0.613386	1.54762	0.660263	0.994991	0.765076	-0.848493	-0.728661	3.63838	2.25425	0.294887	-0.132515	1.37915	0.920918	0.888969	0.278662	1.31398	0.542083	4.68515	3.09349	3.46298	1.82661	1.29739	0.696034	0.638232	-0.677672	0.832967	0.415728	2.93176	1.6572
3360	HTR4	5-hydroxytryptamine (serotonin) receptor 4, G protein-coupled	1.12986	0.271061	0.895128	0.205416	-1.50435	-0.709052	1.67313	1.50225	1.38719	0.529726	3.21207	2.53506	0.628227	-0.107687	-1.67542	-2.20232	-1.53323	-1.28326	-0.455849	-0.386143	1.42411	0.542843	1.47263	0.853358	1.44559	0.16249	-1.60727	-1.04042	1.01288	0.458024
3361	HTR5A	5-hydroxytryptamine (serotonin) receptor 5A, G protein-coupled	1.30363	0.395725	0.659309	0.0410266	0	0.178225	1.24758	1.12576	-1.80081	-1.91244	0	-0.40217	-0.65139	-1.86049	2.1646	1.51281	1.11289	0.413159	-2.54193	-1.79809	2.21731	1.04228	0.966971	0.399381	-0.223194	-1.5741	-2.08473	-1.32534	0.342462	0.0390565
3362	HTR6	5-hydroxytryptamine (serotonin) receptor 6, G protein-coupled	1.12986	0.271061	0.527586	-0.0507971	0	0.178225	0.844051	0.768752	1.00522	0.237118	1.11214	0.614807	1.37915	0.920918	2.1646	1.51281	0	-0.300311	-0.583329	-0.472426	0.917991	0.224166	0.887991	0.328473	0.223194	-1.10957	-2.45589	-1.54682	1.38582	0.691088
3363	HTR7	5-hydroxytryptamine (serotonin) receptor 7, adenylate cyclase-coupled	0.945436	0.13875	0.617967	0.0122072	0.171868	0.279594	0.912066	0.828926	1.13989	0.34028	0.495464	0.0509001	1.79419	1.48943	0.888969	0.278662	0	-0.300311	-2.45917	-1.74207	1.11786	0.35001	-0.699762	-1.09701	1.54512	0.26607	-2.10769	-1.33904	1.48478	0.752928
27429	HTRA2	HtrA serine peptidase 2	2.12986	0.988485	1.86241	0.879703	-2.54314	-1.32174	0.673134	0.61754	1.8101	0.853694	1	0.512266	1.20923	0.688158	0.728504	0.123416	-0.286067	-0.483708	2.52815	1.63355	1.28847	0.457437	1.30254	0.700654	1.72569	0.45398	1.15366	0.607096	-0.499412	-0.487059
84329	HVCN1	hydrogen voltage-gated channel 1	1.1753	0.303662	0.480091	-0.0839062	1.05639	0.801291	-0.844051	-0.724731	-2.18204	-2.20448	0.676679	0.21661	1.20923	0.688158	1.1646	0.545331	1.29176	0.527837	0.657042	0.367106	1.08168	0.327234	0.884073	0.324956	1.09766	-0.199571	0	-0.0813257	-0.988249	-0.79255
3383	ICAM1	intercellular adhesion molecule 1	1.2726	0.373466	1.57215	0.677364	0.93086	0.727252	1.00041	0.907085	-0.767222	-1.12066	1.04801	0.556163	0.77135	0.0883605	1.59524	0.961959	1.03505	0.363256	1.04921	0.632544	1.6929	0.712086	1.04097	0.465819	2.44559	1.20313	-2.10769	-1.33904	2.27487	1.24669
3384	ICAM2	intercellular adhesion molecule 2	1.57347	0.589315	0.149403	-0.314428	-1.38479	-0.638535	0.0567611	0.0722277	1.26305	0.434629	0.760319	0.293093	1.01658	0.424276	1.81097	1.17067	1.76682	0.832395	1.4962	0.93508	-1.09914	-1.04592	1.62241	0.987834	1.96016	0.697973	1.36032	0.730414	0.759628	0.299758
3385	ICAM3	intercellular adhesion molecule 3	0.984255	0.1666	1.18716	0.408988	1.17187	0.8694	1.46304	1.31638	1.25725	0.430183	0.588574	0.136043	1.36397	0.900116	1.54793	0.916192	0.713119	0.156868	-0.633096	-0.506111	1.2461	0.430757	1.17768	0.588551	2.68263	1.4498	0	-0.0813257	2.10379	1.13977
3386	ICAM4	intercellular adhesion molecule 4 (Landsteiner-Wiener blood group)	-0.389668	-0.819085	1.63831	0.723484	0.93086	0.727252	0	0.0220105	1.1304	0.333007	0.836501	0.362756	1.65625	1.30048	0.728504	0.123416	1.23668	0.492523	1.67636	1.05702	3.03513	1.55722	-2.01792	-2.28045	2.39312	1.14853	-2.42962	-1.53114	2.52015	1.39997
7087	ICAM5	intercellular adhesion molecule 5, telencephalin	-1.33767	-1.49921	1.94755	0.939057	-2.91021	-1.53824	1.2964	1.16895	-0.462464	-0.887201	0.289013	-0.137886	1.5175	1.11042	1.88897	1.24614	1.17255	0.451409	1.52182	0.952422	3.00265	1.53677	1.30401	0.701971	2.59243	1.35593	0.477275	0.203477	1.80499	0.953039
29851	ICOS	inducible T-cell co-stimulator	0.850576	0.0706958	0.782321	0.126778	1.05639	0.801291	0	0.0220105	1.42102	0.55564	1.44844	0.922333	1.66866	1.31748	0	-0.581393	-0.847018	-0.843334	-0.313961	-0.290107	1.54746	0.620509	0.0409718	-0.431979	1.63823	0.362963	0.979775	0.503333	1.05103	0.481868
23308	ICOSLG	inducible T-cell co-stimulator ligand	2.1975	1.03701	-0.744547	-0.937599	0.3818	0.403412	0.628031	0.577637	0.589031	-0.081705	1.39593	0.874317	2.34088	2.23828	1.34148	0.716456	0.698867	0.147731	1.03411	0.622322	1.25889	0.438811	1.24184	0.646158	0.808157	-0.500842	1.06224	0.55254	0.295999	0.0100199
[truncated: 2,451 more rows]
