# Supplementary material for: Bioinformatics Analysis of the Human Surfaceome Reveals New Targets for a Variety of Tumor Types
Source: Int J Genomics. 2016 Nov 14;2016:8346198. doi: 10.1155/2016/8346198 (PMC5206789; doi:10.1155/2016/8346198)
Supplement: Supplementary file 2 [file 8346198.f2.xlsx]

## Sheet: Hoja1
gene	number of patients alive where the gene is unaltered	number of patients deceased where the gene is unaltered	number of patients alive where the gene is altered	number of patients deceased where the gene is altered	Log-rank P-value
WNT5A,CNGA2,IGSF9B	827	91	74	24	1.8238e-07
WNT5A,CNGA2,ERVMER34-1	843	96	58	19	6.18154e-07
WNT5A,CNGA2,KCNH7	823	93	78	22	6.59905e-07
TMEM67,CLCN3,OR8D4	659	63	242	52	7.83511e-07
TMEM67,WNT5A,CNGA2	688	68	213	47	7.89348e-07
TMEM67,CLCN3,CNGA2	669	66	232	49	8.49302e-07
TMEM67,CLCN3,WNT5A	671	66	230	49	8.6867e-07
WNT5A,CNGA2,STAB1	827	92	74	23	1.07456e-06
TMEM67,CLCN3,TENM1	672	65	229	50	1.14466e-06
CLCN3,WNT5A,CNGA2	800	89	101	26	1.24957e-06
TMEM67,WNT5A,TENM1	683	66	218	49	1.25239e-06
TMEM67,CNGA2,TENM1	681	66	220	49	1.25824e-06
TMEM67,CLCN3,PCDHGB3	656	64	245	51	1.27147e-06
CLCN3,CNGA2,TMEM131	790	88	111	27	1.35259e-06
TMEM67,CLCN3,TRPV2	670	66	231	49	1.52668e-06
TMEM67,CNGA2,GRM8	679	68	222	47	1.79299e-06
TMEM67,CLCN3,ERVMER34-1	679	68	222	47	1.85997e-06
TMEM67,IGSF9B,TENM1	679	66	222	49	1.94462e-06
TMEM67,CLCN3,IGSF9B	665	66	236	49	1.98156e-06
TMEM67,CNGA2,IGSF9B	682	68	219	47	1.98258e-06
CNGA2,IGSF9B,STAB1	827	90	74	25	1.98555e-06
TMEM67,WNT5A,IGSF9B	684	68	217	47	1.98632e-06
CNGA2,IGSF9B,KCNH7	823	92	78	23	2.04323e-06
TMEM67,CLCN3,GRM8	664	67	237	48	2.17267e-06
CLCN3,CNGA2,ERVMER34-1	812	91	89	24	2.20633e-06
WNT5A,CNGA2,GRIK2	821	90	80	25	2.21246e-06
TMEM67,CLCN3,STAB1	667	65	234	50	2.2224e-06
CNGA2,IGSF9B,TRPV2	828	91	73	24	2.30137e-06
CLCN3,CNGA2,IGSF9B	796	87	105	28	2.46385e-06
TMEM67,CLCN3,CLCNKB	671	67	230	48	2.50511e-06
TMEM67,IGSF9B,GRM8	677	68	224	47	2.516e-06
TMEM67,CLCN3,TMEM131	664	67	237	48	2.63712e-06
TMEM67,STAB1,TENM1	678	65	223	50	2.6456e-06
CLCN3,OR8D4,TMEM131	780	87	121	28	3.03023e-06
CNGA2,IGSF9B,ERVMER34-1	843	95	58	20	3.26152e-06
TMEM67,TENM1,ADIPOR1	551	49	350	66	3.26194e-06
TMEM67,OR8D4,TENM1	670	64	231	51	3.33413e-06
TMEM67,CNGA2,CDON	673	65	228	50	3.57458e-06
CLCN3,TMEM131,KCNH7	786	91	115	24	3.65255e-06
TMEM67,TENM1,NRXN3	681	67	220	48	3.69847e-06
TMEM67,IGSF9B,STAB1	681	67	220	48	4.11255e-06
WNT5A,CNGA2,TENM1	825	91	76	24	4.1872e-06
TMEM67,WNT5A,STAB1	686	68	215	47	4.21649e-06
CLCN3,CNGA2,KCNH7	795	89	106	26	4.22181e-06
CLCN3,IGSF9B,TMEM131	788	90	113	25	4.27807e-06
TMEM67,CNGA2,TRPV2	688	69	213	46	4.47268e-06
TMEM67,TENM1,TRPV2	684	67	217	48	4.79459e-06
WNT5A,CNGA2,TMEM131	820	94	81	21	4.94412e-06
TMEM67,CLCN3,CDON	657	64	244	51	4.95277e-06
TMEM67,TENM1,PCDHGB3	667	65	234	50	5.09394e-06
TMEM67,CNGA2,STAB1	683	68	218	47	5.41627e-06
WNT5A,CNGA2,TAAR2	818	92	83	23	5.51411e-06
CLCN3,CNGA2,GRIK2	792	86	109	29	5.57178e-06
TMEM67,CLCN3,DNAJC16	656	64	245	51	5.78501e-06
WNT5A,IGSF9B,STAB1	828	94	73	21	5.79601e-06
TMEM67,CLCN3,KCNH7	664	68	237	47	5.9137e-06
TMEM67,IGSF9B,OR8D4	680	68	221	47	6.02784e-06
TMEM67,CNGA2,SCN1A	685	68	216	47	6.52e-06
TMEM67,CNGA2,ERVMER34-1	696	71	205	44	6.61387e-06
TMEM67,WNT5A,ERVMER34-1	698	71	203	44	6.62484e-06
CLCN3,TMEM131,CLCNKB	789	91	112	24	6.6755e-06
TMEM67,GRM8,TENM1	677	68	224	47	6.78172e-06
TMEM67,STAB1,GRM8	677	68	224	47	6.81559e-06
TMEM67,STAB1,CDON	669	64	232	51	6.82237e-06
TMEM67,IGSF9B,CDON	678	67	223	48	6.93036e-06
TMEM67,CLCN3,NRXN3	667	67	234	48	7.03354e-06
TMEM67,CLCN3,GRIK2	668	67	233	48	7.0695e-06
TMEM67,ERVMER34-1,TENM1	692	69	209	46	7.19611e-06
WNT5A,CNGA2,TRPV2	829	94	72	21	7.23501e-06
CNGA2,IGSF9B,GRM8	822	90	79	25	7.2396e-06
TMEM67,STAB1,OR8D4	670	65	231	50	7.34418e-06
TMEM67,CNGA2,CLCNKB	690	70	211	45	7.40849e-06
TMEM67,GRM8,PCDHGB3	665	67	236	48	7.42026e-06
TMEM67,IGSF9B,TRPV2	686	69	215	46	7.54681e-06
CLCN3,WNT5A,TMEM131	794	92	107	23	7.57273e-06
CNGA2,IGSF9B,TMEM131	817	93	84	22	7.64567e-06
TMEM67,CDON,TENM1	669	64	232	51	7.86563e-06
TMEM67,CLCN3,SCN1A	669	66	232	49	8.04905e-06
TMEM67,IGSF9B,PCDHGB3	667	67	234	48	8.06335e-06
TMEM67,CNGA2,OR8D4	675	67	226	48	8.60219e-06
CLCN3,OR8D4,ERVMER34-1	803	90	98	25	8.78687e-06
CLCN3,TMEM131,ERVMER34-1	804	94	97	21	8.8689e-06
TMEM67,TMEM81,TENM1	563	53	338	62	8.9034e-06
TMEM67,CNGA2,NRXN3	683	69	218	46	8.99857e-06
WNT5A,IGSF9B,KCNH7	823	96	78	19	9.01186e-06
TMEM67,WNT5A,GRM8	684	70	217	45	9.2875e-06
TMEM67,STAB1,PCDHGB3	668	66	233	49	9.37735e-06
TMEM67,CNGA2,TMEM131	678	70	223	45	9.40805e-06
TMEM67,CLCNKB,TENM1	684	68	217	47	9.49432e-06
CLCN3,WNT5A,ERVMER34-1	814	95	87	20	9.57592e-06
IGSF9B,STAB1,DNAJC16	808	88	93	27	9.91836e-06
CLCN3,TMEM131,PCDHGB3	778	89	123	26	1.01449e-05
TMEM67,GRM8,ERVMER34-1	690	71	211	44	1.02032e-05
TMEM67,TENM1,SCN1A	681	67	220	48	1.04285e-05
CNGA2,STAB1,ERVMER34-1	841	95	60	20	1.05924e-05
TMEM67,WNT5A,OR8D4	677	67	224	48	1.07152e-05
TMEM67,CNGA2,DNAJC16	672	66	229	49	1.07609e-05
TMEM67,WNT5A,SCN1A	689	69	212	46	1.0833e-05
TMEM67,TENM1,LRRN2	572	56	329	59	1.09739e-05
TMEM67,TMEM131,TENM1	675	68	226	47	1.10301e-05
TMEM67,WNT5A,PCDHGB3	674	68	227	47	1.10436e-05
TMEM67,IGSF9B,ERVMER34-1	693	71	208	44	1.11372e-05
TMEM67,WNT5A,TMEM131	679	70	222	45	1.12476e-05
WNT5A,CNGA2,TECRL	820	94	81	21	1.13014e-05
TMEM67,CNGA2,PCDHGB3	673	68	228	47	1.19235e-05
TMEM67,GRM8,CLCNKB	683	70	218	45	1.19846e-05
CLCN3,IGSF9B,ERVMER34-1	811	93	90	22	1.20731e-05
CNGA2,IGSF9B,GRIK2	822	90	79	25	1.21392e-05
CLCN3,WNT5A,IGSF9B	798	91	103	24	1.22095e-05
CLCN3,STAB1,TMEM131	791	90	110	25	1.22819e-05
CNGA2,IGSF9B,OR4Q3	828	92	73	23	1.23317e-05
TMEM67,CDON,PCDHGB3	657	64	244	51	1.24934e-05
CNGA2,IGSF9B,TENM1	825	90	76	25	1.24937e-05
TMEM67,CNGA2,GRIK2	683	69	218	46	1.25211e-05
TMEM67,CLCN3,ADIPOR1	545	51	356	64	1.26333e-05
CLCN3,OR8D4,GRIK2	784	85	117	30	1.27907e-05
TMEM67,CLCN3,TAAR2	663	67	238	48	1.29997e-05
WNT5A,IGSF9B,ERVMER34-1	843	99	58	16	1.30334e-05
TMEM67,CLCN3,TRHR	638	61	263	54	1.31644e-05
TMEM67,TENM1,TAAR2	678	67	223	48	1.31939e-05
TMEM67,OR8D4,GRM8	670	67	231	48	1.32043e-05
TMEM67,CDON,GRIK2	669	66	232	49	1.33449e-05
TMEM67,CLCN3,LRRN2	561	56	340	59	1.3488e-05
TMEM67,GRM8,NRXN3	676	69	225	46	1.35349e-05
TMEM67,STAB1,ERVMER34-1	693	70	208	45	1.36768e-05
CLCN3,OR8D4,KCNH7	785	88	116	27	1.39035e-05
CLCN3,CNGA2,TENM1	806	89	95	26	1.39742e-05
WNT5A,CNGA2,NRXN3	829	94	72	21	1.40595e-05
TMEM67,IGSF9B,DNAJC16	668	66	233	49	1.42231e-05
TMEM67,TRPV2,PCDHGB3	674	68	227	47	1.43308e-05
TMEM67,IGSF9B,SCN1A	681	68	220	47	1.43384e-05
CLCN3,TMEM131,TENM1	797	91	104	24	1.43547e-05
TMEM67,CNGA2,TAAR2	680	69	221	46	1.44464e-05
STAB1,DNAJC16,TMEM131	802	90	99	25	1.44571e-05
CLCN3,TMEM131,OR4Q3	790	91	111	24	1.45515e-05
TMEM67,WNT5A,TAAR2	680	69	221	46	1.45753e-05
TMEM67,GRM8,TMEM131	672	70	229	45	1.46282e-05
TMEM67,IGSF9B,CLCNKB	685	70	216	45	1.47528e-05
TMEM67,CNGA2,TRHR	651	62	250	53	1.48163e-05
TMEM67,WNT5A,GRIK2	684	69	217	46	1.49699e-05
CLCN3,ERVMER34-1,PCDHGB3	802	92	99	23	1.49733e-05
CNGA2,CDON,GRIK2	811	87	90	28	1.50702e-05
TMEM67,STAB1,CLCNKB	686	69	215	46	1.51623e-05
CLCN3,IGSF9B,OR8D4	799	90	102	25	1.51658e-05
CLCN3,CNGA2,STAB1	798	88	103	27	1.55596e-05
TMEM67,STAB1,TRPV2	688	69	213	46	1.60188e-05
CLCN3,STAB1,OR8D4	789	86	112	29	1.6405e-05
WNT5A,CNGA2,SCN1A	833	94	68	21	1.65443e-05
CNGA2,STAB1,CDON	815	87	86	28	1.6763e-05
CLCN3,CNGA2,OR8D4	790	86	111	29	1.70241e-05
CLCN3,IGSF9B,KCNH7	794	91	107	24	1.71744e-05
WNT5A,CNGA2,OR4Q3	829	94	72	21	1.76676e-05
TMEM67,STAB1,NRXN3	679	68	222	47	1.76716e-05
TMEM67,ERVMER34-1,PCDHGB3	682	70	219	45	1.77533e-05
IGSF9B,DNAJC16,TMEM131	801	91	100	24	1.78006e-05
TMEM67,CDON,CLCNKB	676	67	225	48	1.7841e-05
TMEM67,IGSF9B,TMEM131	674	70	227	45	1.83733e-05
CLCN3,ERVMER34-1,KCNH7	810	95	91	20	1.84427e-05
TMEM67,STAB1,TRHR	648	61	253	54	1.85508e-05
TMEM67,CDON,ERVMER34-1	682	68	219	47	1.90166e-05
CNGA2,STAB1,TMEM131	819	93	82	22	1.9376e-05
CLCN3,WNT5A,KCNH7	797	93	104	22	1.93835e-05
CLCN3,CNGA2,NRXN3	799	89	102	26	1.94807e-05
TMEM67,STAB1,DNAJC16	667	65	234	50	1.97098e-05
CNGA2,GRIK2,TRPV2	821	90	80	25	1.97637e-05
CLCN3,TMEM131,NRXN3	789	91	112	24	2.01696e-05
CLCN3,CNGA2,CDON	789	85	112	30	2.02538e-05
TMEM67,STAB1,TMEM131	676	69	225	46	2.02551e-05
TMEM67,OR8D4,ERVMER34-1	684	69	217	46	2.02668e-05
CNGA2,IGSF9B,DNAJC16	811	88	90	27	2.0799e-05
CNGA2,IGSF9B,CDON	828	91	73	24	2.08204e-05
CLCN3,TMEM131,GRIK2	783	89	118	26	2.08686e-05
TMEM67,WNT5A,KCNH7	682	71	219	44	2.13066e-05
TMEM67,CLCN3,TECRL	666	69	235	46	2.15119e-05
TMEM67,GRM8,TAAR2	672	69	229	46	2.15925e-05
TMEM67,CDON,SCN1A	670	65	231	50	2.16777e-05
TMEM67,KCNH7,TENM1	676	69	225	46	2.17128e-05
TMEM67,CNGA2,KCNH7	680	71	221	44	2.1736e-05
TMEM67,WNT5A,CDON	676	67	225	48	2.17583e-05
TMEM67,OR8D4,NRXN3	671	67	230	48	2.18343e-05
TMEM67,WNT5A,NRXN3	685	70	216	45	2.18465e-05
TMEM67,WNT5A,CLCNKB	691	71	210	44	2.18473e-05
TMEM67,IGSF9B,GRIK2	680	69	221	46	2.19717e-05
TMEM67,GRM8,GRIK2	677	69	224	46	2.21741e-05
TMEM67,TRPV2,NRXN3	686	70	215	45	2.22582e-05
STAB1,TMEM131,CLCNKB	819	96	82	19	2.23772e-05
TMEM67,IGSF9B,TRHR	646	62	255	53	2.23921e-05
TMEM67,WNT5A,TRPV2	692	71	209	44	2.24183e-05
CLCN3,CNGA2,SLC30A8	653	62	248	53	2.27802e-05
TMEM67,GRM8,SCN1A	680	69	221	46	2.30945e-05
TMEM67,CDON,NRXN3	669	66	232	49	2.33485e-05
TMEM67,OR8D4,SCN1A	673	66	228	49	2.35274e-05
CLCN3,CNGA2,TRPV2	797	89	104	26	2.37964e-05
IGSF9B,STAB1,CLCNKB	826	94	75	21	2.41327e-05
TMEM67,ERVMER34-1,TRPV2	699	72	202	43	2.41611e-05
CLCN3,WNT5A,GRIK2	792	89	109	26	2.42769e-05
TMEM67,CLCN3,OR4Q3	669	69	232	46	2.44255e-05
WNT5A,STAB1,ERVMER34-1	842	99	59	16	2.51926e-05
TMEM67,CLCNKB,TRPV2	692	71	209	44	2.52788e-05
TMEM67,STAB1,TAAR2	676	68	225	47	2.54251e-05
TMEM67,OR8D4,GRIK2	673	67	228	48	2.56182e-05
TMEM67,OR8D4,CLCNKB	677	68	224	47	2.56363e-05
CNGA2,STAB1,KCNH7	822	93	79	22	2.60704e-05
TMEM67,DNAJC16,TENM1	670	66	231	49	2.61972e-05
TMEM67,CDON,TAAR2	667	66	234	49	2.63819e-05
CLCN3,DNAJC16,TMEM131	778	88	123	27	2.65468e-05
TMEM67,GRIK2,TENM1	681	68	220	47	2.67386e-05
CLCN3,TMEM131,TECRL	784	91	117	24	2.68906e-05
IGSF9B,STAB1,ERVMER34-1	843	97	58	18	2.72526e-05
CNGA2,STAB1,NRXN3	825	92	76	23	2.76006e-05
CLCN3,GRIK2,ERVMER34-1	805	91	96	24	2.76376e-05
CLCN3,IGSF9B,STAB1	798	89	103	26	2.79083e-05
TMEM67,STAB1,GRIK2	679	68	222	47	2.81928e-05
CNGA2,IGSF9B,SCN1A	830	92	71	23	2.81957e-05
TMEM67,TRHR,TENM1	648	61	253	54	2.82606e-05
TMEM67,TMEM131,CDON	665	67	236	48	2.89322e-05
CLCN3,CNGA2,TAAR2	790	88	111	27	2.95137e-05
TMEM67,TMEM81,GRM8	556	55	345	60	2.98218e-05
IGSF9B,STAB1,TMEM131	820	95	81	20	2.98398e-05
TMEM67,OR8D4,CDON	670	66	231	49	3.01676e-05
WNT5A,CNGA2,OR8D4	819	91	82	24	3.09705e-05
CNGA2,IGSF9B,NRXN3	830	93	71	22	3.10205e-05
TMEM67,ADIPOR1,NRXN3	555	53	346	62	3.10405e-05
TMEM67,SCN1A,PCDHGB3	669	67	232	48	3.11281e-05
TMEM67,CNGA2,TECRL	679	71	222	44	3.12155e-05
TMEM67,DNAJC16,ERVMER34-1	683	69	218	46	3.12801e-05
CNGA2,IGSF9B,OR8D4	829	93	72	22	3.1323e-05
CNGA2,TMEM131,TRPV2	818	94	83	21	3.14687e-05
TMEM67,OR8D4,TMEM131	665	68	236	47	3.16989e-05
TMEM67,GRM8,CDON	668	67	233	48	3.17727e-05
CLCN3,WNT5A,OR8D4	792	89	109	26	3.18131e-05
TMEM67,WNT5A,ADIPOR1	555	53	346	62	3.18648e-05
IGSF9B,DNAJC16,OR4Q3	809	90	92	25	3.21021e-05
DNAJC16,TMEM131,OR4Q3	800	91	101	24	3.22701e-05
CLCN3,STAB1,ERVMER34-1	812	93	89	22	3.24554e-05
TMEM67,GRM8,KCNH7	674	71	227	44	3.25339e-05
TMEM67,CNGA2,OR4Q3	686	71	215	44	3.2649e-05
TMEM67,TMEM131,TRPV2	681	71	220	44	3.27847e-05
TMEM67,CDON,TRPV2	676	67	225	48	3.30425e-05
WNT5A,CNGA2,GRM8	824	93	77	22	3.31781e-05
TMEM67,GRM8,TRPV2	684	71	217	44	3.32583e-05
CNGA2,IGSF9B,TECRL	819	93	82	22	3.33243e-05
CLCN3,IGSF9B,GRIK2	791	88	110	27	3.37558e-05
WNT5A,CNGA2,CDON	820	90	81	25	3.37589e-05
TMEM67,CLCN3,IL2RB	670	68	231	47	3.38783e-05
TMEM67,OR8D4,PCDHGB3	659	66	242	49	3.42229e-05
CNGA2,TENM1,NRXN3	827	92	74	23	3.44596e-05
TMEM67,TRPV2,TAAR2	682	70	219	45	3.50089e-05
TMEM67,GRM8,ADIPOR1	551	53	350	62	3.51034e-05
TMEM67,IGSF9B,KCNH7	676	71	225	44	3.53441e-05
IGSF9B,GRM8,ERVMER34-1	837	96	64	19	3.54418e-05
TMEM67,OR8D4,TRPV2	677	68	224	47	3.56941e-05
TMEM67,IGSF9B,NRXN3	681	70	220	45	3.56949e-05
TMEM67,WNT5A,TECRL	681	71	220	44	3.61003e-05
TMEM67,CLCN3,NIPAL2	652	65	249	50	3.63846e-05
TMEM67,CNGA2,SLC30A8	631	60	270	55	3.6653e-05
TMEM67,STAB1,ADIPOR1	552	52	349	63	3.70675e-05
IGSF9B,GRM8,TMEM131	811	94	90	21	3.73933e-05
WNT5A,IGSF9B,GRM8	823	94	78	21	3.75744e-05
TMEM67,OR8D4,TAAR2	668	67	233	48	3.76585e-05
CLCN3,OR8D4,TENM1	797	88	104	27	3.78293e-05
TMEM67,TENM1,TECRL	674	69	227	46	3.80175e-05
TMEM67,CLCNKB,ERVMER34-1	700	73	201	42	3.82084e-05
TMEM67,CLCNKB,ADIPOR1	555	53	346	62	3.82141e-05
TMEM67,TMEM131,PCDHGB3	663	69	238	46	3.90252e-05
TMEM67,ERVMER34-1,ADIPOR1	561	54	340	61	3.9065e-05
TMEM67,TENM1,OR4Q3	680	69	221	46	3.96472e-05
CNGA2,STAB1,TAAR2	816	91	85	24	3.9712e-05
IGSF9B,TMEM131,KCNH7	814	97	87	18	3.99857e-05
DNAJC16,TMEM131,KCNH7	797	92	104	23	4.00189e-05
CNGA2,STAB1,GRIK2	819	90	82	25	4.05184e-05
CLCN3,CNGA2,TECRL	793	90	108	25	4.05431e-05
TMEM67,STAB1,KCNH7	676	70	225	45	4.18049e-05
CNGA2,STAB1,DNAJC16	809	88	92	27	4.18332e-05
TMEM67,SCN1A,TRPV2	689	70	212	45	4.231e-05
TMEM67,TMEM131,CLCNKB	683	72	218	43	4.2398e-05
CNGA2,TMEM131,KCNH7	815	95	86	20	4.24661e-05
MAL2,TENM1,ADIPOR1	529	45	372	70	4.26117e-05
CLCN3,TMEM131,CDON	780	88	121	27	4.28076e-05
TMEM67,TMEM131,ADIPOR1	544	53	357	62	4.28532e-05
CLCN3,GRM8,TMEM131	787	91	114	24	4.32404e-05
CNGA2,STAB1,TRPV2	829	93	72	22	4.3272e-05
WNT5A,IGSF9B,TMEM131	819	97	82	18	4.34788e-05
TMEM67,CLCN3,SLC30A8	618	59	283	56	4.35286e-05
CNGA2,ERVMER34-1,TRPV2	844	97	57	18	4.37415e-05
WNT5A,ERVMER34-1,KCNH7	839	101	62	14	4.37742e-05
CNGA2,GRIK2,TAAR2	819	90	82	25	4.4322e-05
CLCN3,IGSF9B,PCDHGB3	786	89	115	26	4.43683e-05
TMEM67,CNGA2,ADIPOR1	559	54	342	61	4.50254e-05
TMEM67,TMEM81,TRPV2	564	56	337	59	4.50887e-05
TMEM67,ERVMER34-1,SCN1A	695	71	206	44	4.53763e-05
TMEM67,DNAJC16,TMEM131	667	68	234	47	4.56083e-05
TMEM67,ERVMER34-1,NRXN3	693	72	208	43	4.63962e-05
TMEM67,CLCNKB,SCN1A	688	70	213	45	4.67747e-05
CNGA2,GRIK2,ERVMER34-1	836	94	65	21	4.68372e-05
IGSF9B,DNAJC16,KCNH7	804	91	97	24	4.75361e-05
CLCN3,CDON,GRIK2	782	86	119	29	4.79351e-05
CNGA2,ERVMER34-1,KCNH7	840	98	61	17	4.80358e-05
CLCN3,CNGA2,PCDHGB3	790	88	111	27	4.8213e-05
CNGA2,CDON,ERVMER34-1	832	92	69	23	4.83185e-05
TMEM67,CLCN3,TMEM68	617	62	284	53	4.87743e-05
TMEM67,PCDHGB3,TAAR2	664	68	237	47	4.9096e-05
CNGA2,DNAJC16,TMEM131	804	90	97	25	4.93171e-05
TMEM67,GRIK2,TRPV2	685	70	216	45	4.99383e-05
TMEM67,IGSF9B,ADIPOR1	549	53	352	62	4.99695e-05
WNT5A,IGSF9B,TENM1	826	94	75	21	4.99807e-05
TMEM67,GRIK2,PCDHGB3	667	68	234	47	5.06051e-05
TMEM67,ERVMER34-1,TRHR	661	65	240	50	5.08603e-05
WNT5A,IGSF9B,SCN1A	830	95	71	20	5.10381e-05
CLCN3,WNT5A,STAB1	801	92	100	23	5.12239e-05
CLCN3,STAB1,KCNH7	794	91	107	24	5.15258e-05
TMEM67,SCN1A,NRXN3	682	69	219	46	5.15315e-05
CLCN3,OR8D4,NRXN3	789	88	112	27	5.20536e-05
TMEM67,CDON,TRHR	640	62	261	53	5.3673e-05
IGSF9B,TMEM131,CLCNKB	816	97	85	18	5.39096e-05
TMEM67,GRM8,TECRL	673	71	228	44	5.41531e-05
CLCN3,STAB1,PCDHGB3	786	88	115	27	5.44881e-05
TMEM67,CDON,KCNH7	666	68	235	47	5.45967e-05
IGSF9B,STAB1,KCNH7	824	95	77	20	5.46754e-05
TMEM67,CLCNKB,TAAR2	685	71	216	44	5.54465e-05
TMEM67,DNAJC16,PCDHGB3	657	66	244	49	5.55148e-05
CNGA2,TRPV2,NRXN3	829	94	72	21	5.56787e-05
TMEM67,ADIPOR1,TRPV2	557	54	344	61	5.58532e-05
TMEM67,GRM8,OR4Q3	678	71	223	44	5.65217e-05
TMEM67,OR8D4,DNAJC16	660	65	241	50	5.65299e-05
CLCN3,CNGA2,SCN1A	801	89	100	26	5.66928e-05
CLCN3,IGSF9B,TENM1	806	91	95	24	5.68844e-05
TMEM67,TMEM131,SCN1A	677	70	224	45	5.73213e-05
CNGA2,GRIK2,KCNH7	818	92	83	23	5.77965e-05
TMEM67,DNAJC16,GRM8	669	68	232	47	5.8001e-05
TMEM67,IGSF9B,TECRL	675	71	226	44	5.87094e-05
WNT5A,IGSF9B,GRIK2	820	93	81	22	5.89027e-05
TMEM67,OR8D4,KCNH7	668	69	233	46	5.91988e-05
TMEM67,IGSF9B,TAAR2	677	70	224	45	5.92627e-05
TMEM67,PCDHGB3,TECRL	666	70	235	45	6.097e-05
CLCN3,TMEM131,TRPV2	788	91	113	24	6.10689e-05
TMEM67,IGSF9B,OR4Q3	681	71	220	44	6.13159e-05
CNGA2,SLC30A8,TENM1	670	64	231	51	6.19346e-05
TMEM67,STAB1,SLC30A8	630	61	271	54	6.19944e-05
CLCN3,CNGA2,OR4Q3	799	90	102	25	6.2224e-05
WNT5A,IGSF9B,TECRL	817	95	84	20	6.25913e-05
TMEM67,CLCN3,FREM2	666	68	235	47	6.29105e-05
WNT5A,TMEM131,KCNH7	816	98	85	17	6.37137e-05
CLCN3,IGSF9B,CLCNKB	795	91	106	24	6.39901e-05
CLCN3,IGSF9B,NRXN3	799	91	102	24	6.40077e-05
CNGA2,TMEM131,CDON	808	90	93	25	6.40357e-05
CNGA2,TMEM131,TENM1	815	92	86	23	6.4409e-05
TMEM67,WNT5A,DNAJC16	674	68	227	47	6.45906e-05
CLCN3,CNGA2,GRM8	795	89	106	26	6.54797e-05
IGSF9B,OR8D4,TMEM131	816	96	85	19	6.56815e-05
TMEM67,WNT5A,LRRN2	574	59	327	56	6.58659e-05
IGSF9B,STAB1,OR8D4	829	94	72	21	6.68731e-05
CLCN3,WNT5A,PCDHGB3	791	91	110	24	6.71476e-05
TMEM67,KCNH7,ADIPOR1	551	54	350	61	6.715e-05
TMEM67,CDON,TECRL	665	68	236	47	6.71754e-05
CLCN3,TMEM131,TAAR2	782	91	119	24	6.72222e-05
TMEM67,STAB1,OR4Q3	682	70	219	45	6.79328e-05
TMEM67,TRHR,SCN1A	650	62	251	53	6.82488e-05
IGSF9B,GRM8,KCNH7	818	94	83	21	6.82734e-05
WNT5A,STAB1,TMEM131	822	97	79	18	6.8373e-05
TMEM67,TMEM131,NRXN3	675	71	226	44	6.84011e-05
STAB1,CDON,CLCNKB	817	91	84	24	6.84343e-05
CLCN3,GRIK2,PCDHGB3	780	87	121	28	6.86517e-05
CLCN3,WNT5A,TENM1	808	93	93	22	6.88504e-05
TMEM67,TRHR,ADIPOR1	526	47	375	68	6.95052e-05
CLCN3,OR8D4,TECRL	783	88	118	27	6.99692e-05
CLCN3,CLCNKB,ERVMER34-1	811	95	90	20	7.09734e-05
TMEM67,TRHR,TAAR2	647	63	254	52	7.09799e-05
IGSF9B,ERVMER34-1,KCNH7	840	100	61	15	7.12906e-05
WNT5A,STAB1,CLCNKB	828	97	73	18	7.16421e-05
TMEM67,STAB1,SCN1A	683	69	218	46	7.16601e-05
TMEM67,ERVMER34-1,TAAR2	689	72	212	43	7.17211e-05
TMEM81,TRHR,ABCA13	558	53	343	62	7.17707e-05
CNGA2,GRIK2,NRXN3	821	91	80	24	7.17711e-05
WNT5A,IGSF9B,OR8D4	828	96	73	19	7.23287e-05
CLCN3,ERVMER34-1,TENM1	821	95	80	20	7.27864e-05
TMEM67,DNAJC16,CLCNKB	679	69	222	46	7.28592e-05
TMEM67,TMEM131,TRHR	644	64	257	51	7.29041e-05
CLCN3,SLC30A8,TMEM131	647	65	254	50	7.29223e-05
TMEM67,ADIPOR1,PCDHGB3	542	52	359	63	7.31144e-05
TMEM67,KCNH7,TRPV2	683	72	218	43	7.31948e-05
TMEM67,DNAJC16,TRPV2	675	68	226	47	7.35212e-05
TMEM67,CNGA2,LRRN2	577	60	324	55	7.37636e-05
IGSF9B,STAB1,OR4Q3	828	94	73	21	7.41348e-05
TMEM67,GRIK2,ERVMER34-1	693	72	208	43	7.41618e-05
TMEM67,GRIK2,TRHR	649	64	252	51	7.42627e-05
TMEM67,CLCNKB,PCDHGB3	675	70	226	45	7.42855e-05
CNGA2,CDON,NRXN3	816	89	85	26	7.43745e-05
TMEM67,OR8D4,TRHR	642	61	259	54	7.453e-05
CNGA2,IGSF9B,CLCNKB	828	94	73	21	7.46689e-05
WNT5A,CNGA2,CLCNKB	831	96	70	19	7.48018e-05
CLCN3,IGSF9B,GRM8	794	90	107	25	7.51942e-05
TMEM67,SLC30A8,TENM1	631	60	270	55	7.55868e-05
CNGA2,CDON,TRPV2	818	89	83	26	7.66067e-05
WNT5A,STAB1,KCNH7	823	97	78	18	7.67781e-05
IGSF9B,TMEM131,OR4Q3	816	96	85	19	7.75369e-05
TMEM67,DNAJC16,TAAR2	667	67	234	48	7.76452e-05
TMEM67,WNT5A,TRHR	654	64	247	51	7.78868e-05
CNGA2,TRPV2,TAAR2	821	93	80	22	7.8282e-05
CLCN3,IGSF9B,OR4Q3	797	91	104	24	7.86766e-05
CLCN3,STAB1,CLCNKB	798	91	103	24	7.90978e-05
TMEM67,TMEM81,TRHR	534	50	367	65	7.92564e-05
CLCN3,GRIK2,KCNH7	789	90	112	25	7.95136e-05
WNT5A,IGSF9B,OR4Q3	827	96	74	19	7.95514e-05
TMEM67,IGSF9B,SLC30A8	629	61	272	54	7.9777e-05
CNGA2,STAB1,OR4Q3	828	93	73	22	8.01031e-05
TMEM67,STAB1,TMEM81	560	55	341	60	8.04718e-05
CNGA2,CDON,KCNH7	812	90	89	25	8.06203e-05
TMEM67,ADIPOR1,IL2RB	554	54	347	61	8.06682e-05
TMEM67,OR8D4,TECRL	668	69	233	46	8.14244e-05
CLCN3,PCDHGB3,TECRL	784	90	117	25	8.18384e-05
TMEM67,CLCN3,ABCA13	655	65	246	50	8.18394e-05
STAB1,CLCNKB,ERVMER34-1	841	99	60	16	8.22675e-05
TMEM67,WNT5A,OR4Q3	688	72	213	43	8.25761e-05
TMEM131,CLCNKB,KCNH7	813	98	88	17	8.27081e-05
TMEM67,NIPAL2,TENM1	662	65	239	50	8.30333e-05
TMEM67,SCN1A,TAAR2	677	69	224	46	8.32353e-05
TMEM67,GRIK2,NRXN3	680	70	221	45	8.36337e-05
TMEM131,CLCNKB,TECRL	810	97	91	18	8.38664e-05
CNGA2,GRM8,GRIK2	817	90	84	25	8.40834e-05
TMEM67,OR8D4,OR4Q3	673	69	228	46	8.47161e-05
TMEM67,TMEM81,TMEM131	557	57	344	58	8.47981e-05
TMEM67,GRIK2,SCN1A	683	69	218	46	8.54817e-05
IGSF9B,STAB1,GRM8	823	93	78	22	8.59002e-05
CNGA2,ERVMER34-1,TENM1	840	95	61	20	8.68643e-05
CNGA2,DNAJC16,ANKRD46	657	67	244	48	8.74902e-05
CLCN3,OR8D4,SCN1A	790	87	111	28	8.7574e-05
TMEM67,GRM8,LRRN2	568	59	333	56	8.78358e-05
TMEM67,STAB1,LRRN2	571	58	330	57	8.78481e-05
TMEM67,CNGA2,NIPAL2	668	67	233	48	8.80807e-05
TMEM67,TENM1,IL2RB	684	69	217	46	8.93229e-05
TMEM67,SLC30A8,NRXN3	628	61	273	54	8.96063e-05
TMEM67,STAB1,NIPAL2	664	67	237	48	8.99984e-05
TMEM67,ADIPOR1,TAAR2	548	53	353	62	9.02228e-05
TMEM67,ADIPOR1,TECRL	550	54	351	61	9.05619e-05
TMEM67,WNT5A,IL2RB	691	71	210	44	9.05715e-05
CNGA2,STAB1,CLCNKB	828	94	73	21	9.05768e-05
STAB1,MAL2,ADIPOR1	529	47	372	68	9.07778e-05
WNT5A,CNGA2,SLC30A8	675	66	226	49	9.13784e-05
CLCN3,SLC30A8,CLCNKB	654	65	247	50	9.21803e-05
TMEM67,GRIK2,CLCNKB	685	71	216	44	9.24649e-05
STAB1,DNAJC16,OR4Q3	807	90	94	25	9.29207e-05
CNGA2,DNAJC16,KCNH7	806	90	95	25	9.37355e-05
CLCN3,GRIK2,TAAR2	789	88	112	27	9.38616e-05
TMEM67,ERVMER34-1,LRRN2	583	61	318	54	9.49931e-05
WNT5A,IGSF9B,CLCNKB	827	97	74	18	9.53446e-05
TMEM67,DNAJC16,GRIK2	668	67	233	48	9.59697e-05
TMEM67,GRM8,TRHR	647	64	254	51	9.62052e-05
CNGA2,OR8D4,GRIK2	814	89	87	26	9.62825e-05
CLCN3,STAB1,GRIK2	791	88	110	27	9.64671e-05
OR8D4,DNAJC16,TMEM131	790	89	111	26	9.67743e-05
TMEM67,OR8D4,FREM2	676	70	225	45	9.69026e-05
TMEM67,CDON,ADIPOR1	540	51	361	64	9.76871e-05
TMEM67,TRPV2,TECRL	682	72	219	43	9.77098e-05
CNGA2,STAB1,SLC30A8	668	66	233	49	9.7733e-05
TMEM67,DNAJC16,ADIPOR1	545	51	356	64	9.89968e-05
CNGA2,STAB1,OR8D4	818	90	83	25	0.000101165
CNGA2,OR8D4,ERVMER34-1	833	94	68	21	0.000102048
WNT5A,STAB1,TAAR2	816	95	85	20	0.000102067
TMEM67,OR4Q3,PCDHGB3	670	70	231	45	0.000102677
TMEM67,WNT5A,TMEM81	563	57	338	58	0.000102863
TMEM67,CLCN3,TMEM81	556	56	345	59	0.000103368
CLCN3,WNT5A,OR4Q3	800	93	101	22	0.000103894
CLCN3,GRIK2,CLCNKB	789	89	112	26	0.000104235
CNGA2,STAB1,TENM1	823	91	78	24	0.000105325
TMEM67,ERVMER34-1,KCNH7	691	74	210	41	0.000105422
TMEM67,LRRN2,NRXN3	576	60	325	55	0.000105434
CNGA2,DNAJC16,GRIK2	805	87	96	28	0.000105789
CLCN3,DNAJC16,FZD6	660	69	241	46	0.000106382
CLCN3,OR8D4,CLCNKB	789	89	112	26	0.000106622
TMEM81,TMEM131,TENM1	675	74	226	41	0.000106692
TMEM67,TMEM81,ERVMER34-1	571	58	330	57	0.000108226
CNGA2,KCNH7,TRPV2	825	95	76	20	0.00010835
IGSF9B,GRM8,GRIK2	816	91	85	24	0.000108448
CLCN3,CNGA2,TRHR	680	68	221	47	0.000109172
CNGA2,TMEM81,TRHR	577	55	324	60	0.00010999
TMEM67,STAB1,TMEM68	623	62	278	53	0.000110786
CLCN3,CLCNKB,KCNH7	794	93	107	22	0.000111302
TMEM67,TMEM131,GRIK2	674	71	227	44	0.000112344
TMEM67,CLCN3,FZD6	638	67	263	48	0.000113275
CLCN3,ERVMER34-1,OR4Q3	812	95	89	20	0.000114095
TMEM67,TENM1,TMEM68	622	62	279	53	0.000114221
TMEM67,TRHR,LRRN2	545	53	356	62	0.000114366
CLCN3,CNGA2,CLCNKB	800	91	101	24	0.000114611
CNGA2,MAL2,ADIPOR1	532	46	369	69	0.000114896
IGSF9B,OR8D4,ERVMER34-1	843	99	58	16	0.000114902
IGSF9B,DNAJC16,GRIK2	802	88	99	27	0.000116991
TMEM67,ADIPOR1,SCN1A	553	53	348	62	0.000117152
TMEM67,SLC30A8,ERVMER34-1	642	63	259	52	0.00011722
CLCN3,KCNH7,TENM1	803	93	98	22	0.000117517
TMEM67,ADIPOR1,OR4Q3	551	54	350	61	0.00011775
TMEM67,CNGA2,ABCA13	669	67	232	48	0.000118077
CLCN3,KCNH7,PCDHGB3	787	91	114	24	0.000118082
TMEM67,CLCNKB,TRHR	657	65	244	50	0.000119143
CLCN3,TENM1,NRXN3	809	93	92	22	0.00011957
TMEM67,TRHR,TRPV2	657	65	244	50	0.000119571
TMEM67,SLC30A8,TRHR	627	59	274	56	0.00012004
TMEM67,DNAJC16,CDON	659	65	242	50	0.000120858
CLCN3,IGSF9B,TECRL	791	91	110	24	0.000120933
TMEM67,DNAJC16,SCN1A	674	68	227	47	0.000121195
STAB1,DNAJC16,ERVMER34-1	824	94	77	21	0.000121414
TMEM67,TMEM131,ERVMER34-1	690	74	211	41	0.000122965
TMEM67,ERVMER34-1,TECRL	690	74	211	41	0.000123239
CLCN3,GRIK2,NRXN3	792	89	109	26	0.000123327
TMEM67,TMEM81,SCN1A	566	57	335	58	0.000123627
TMEM67,OR4Q3,TRPV2	687	72	214	43	0.00012374
IGSF9B,STAB1,CDON	826	93	75	22	0.000123811
CLCN3,TENM1,PCDHGB3	795	90	106	25	0.000124557
TMEM67,TRHR,NRXN3	649	64	252	51	0.00012471
CLCN3,OR8D4,TAAR2	783	88	118	27	0.000124964
TMEM67,SLC30A8,PCDHGB3	619	60	282	55	0.0001252
CNGA2,CDON,TECRL	809	90	92	25	0.000125484
CLCN3,CDON,ERVMER34-1	802	91	99	24	0.000126082
STAB1,DNAJC16,GRIK2	798	87	103	28	0.000126389
CLCN3,TMEM131,ADIPOR1	644	70	257	45	0.000126876
TMEM81,GRM8,TMEM131	668	75	233	40	0.000126999
TMEM67,WNT5A,ABCA13	670	67	231	48	0.000127032
CLCN3,WNT5A,TECRL	795	93	106	22	0.000127155
CNGA2,GRIK2,TENM1	821	90	80	25	0.000127345
CNGA2,OR8D4,NRXN3	818	91	83	24	0.000127921
CLCN3,GRM8,ERVMER34-1	809	94	92	21	0.00012795
TMEM67,GRIK2,TAAR2	678	70	223	45	0.000128046
TMEM67,KCNH7,SCN1A	681	71	220	44	0.000128276
WNT5A,STAB1,GRIK2	818	93	83	22	0.000128676
TMEM67,CNGA2,TMEM68	621	63	280	52	0.000128719
TMEM67,GRM8,IL2RB	682	71	219	44	0.000128889
TMEM67,IGSF9B,NIPAL2	664	67	237	48	0.00012889
TMEM67,IGSF9B,TMEM81	560	57	341	58	0.000129965
TMEM81,TMEM131,TRHR	566	56	335	59	0.000130033
TMEM67,TRHR,PCDHGB3	639	63	262	52	0.000130488
CNGA2,OR8D4,TMEM131	808	92	93	23	0.000130854
CNGA2,TENM1,TRPV2	825	92	76	23	0.000130936
CLCN3,SLC30A8,DNAJC16	649	64	252	51	0.00013099
STAB1,OR8D4,DNAJC16	797	87	104	28	0.000131098
CNGA2,SLC30A8,DNAJC16	663	64	238	51	0.000131952
TMEM67,CLCNKB,NRXN3	686	72	215	43	0.000131998
TMEM67,CNGA2,TMEM81	567	58	334	57	0.000132488
TMEM67,TMEM81,LRRN2	555	57	346	58	0.000132528
CLCN3,CNGA2,DNAJC16	786	87	115	28	0.000132783
CNGA2,IGSF9B,SLC30A8	670	66	231	49	0.00013294
CLCN3,IGSF9B,DNAJC16	783	88	118	27	0.000133008
TMEM67,CLCNKB,KCNH7	683	73	218	42	0.000133575
TMEM67,MAL2,ADIPOR1	502	44	399	71	0.000133702
CNGA2,CDON,TAAR2	810	89	91	26	0.000134442
TMEM67,TMEM81,CDON	547	54	354	61	0.000135103
CLCN3,SLC30A8,PCDHGB3	646	64	255	51	0.000135148
TMEM67,DNAJC16,TECRL	665	69	236	46	0.000135247
TMEM67,CLCN3,ANKRD46	628	66	273	49	0.000135309
TMEM67,CLCNKB,TECRL	683	73	218	42	0.000135401
IGSF9B,OR8D4,GRIK2	823	93	78	22	0.000136072
CNGA2,DNAJC16,OR4Q3	813	90	88	25	0.000136908
TMEM67,IGSF9B,IL2RB	685	71	216	44	0.000137285
TMEM67,DNAJC16,NRXN3	669	68	232	47	0.000137353
STAB1,DNAJC16,KCNH7	802	91	99	24	0.000137639
TMEM67,CLCNKB,LRRN2	575	60	326	55	0.000137718
TMEM67,PCDHGB3,NRXN3	671	70	230	45	0.000138199
CNGA2,MAL2,TENM1	653	60	248	55	0.000138384
TMEM67,GRIK2,ADIPOR1	553	54	348	61	0.000140054
CNGA2,CLCNKB,TRPV2	829	95	72	20	0.000141237
TMEM67,GRM8,TMEM68	622	63	279	52	0.000141276
TMEM67,OR8D4,ADIPOR1	547	53	354	62	0.000141431
IGSF9B,GRM8,CLCNKB	820	94	81	21	0.000141624
TMEM67,SLC30A8,SCN1A	630	60	271	55	0.000142054
CNGA2,TENM1,TAAR2	820	91	81	24	0.000142077
IGSF9B,DNAJC16,ERVMER34-1	827	95	74	20	0.000142143
CLCN3,TMEM131,SCN1A	791	91	110	24	0.000142233
CLCN3,STAB1,TENM1	806	91	95	24	0.000142441
TMEM67,DNAJC16,KCNH7	665	69	236	46	0.000143658
TMEM67,IGSF9B,TMEM68	623	64	278	51	0.000143859
TMEM67,SLC30A8,TMEM81	518	49	383	66	0.000144463
TMEM67,TRHR,KCNH7	646	65	255	50	0.000144663
TMEM67,LRRN2,TRPV2	575	60	326	55	0.000144718
CLCN3,WNT5A,TAAR2	790	92	111	23	0.000145348
IGSF9B,STAB1,PCDHGB3	815	93	86	22	0.000145542
MAL2,TMEM131,ADIPOR1	520	47	381	68	0.000146127
TMEM67,GRIK2,KCNH7	678	72	223	43	0.000146272
CNGA2,CDON,SCN1A	819	89	82	26	0.000146447
CLCN3,STAB1,OR4Q3	798	91	103	24	0.000147548
CNGA2,SLC30A8,CLCNKB	670	66	231	49	0.000147773
CLCN3,WNT5A,SLC30A8	660	66	241	49	0.000148288
TMEM67,NRXN3,TAAR2	678	71	223	44	0.000149638
CNGA2,SLC30A8,NRXN3	669	66	232	49	0.00015102
TMEM67,SLC30A8,ADIPOR1	512	46	389	69	0.000151466
CLCN3,TRHR,TMEM68	612	58	289	57	0.000151698
CLCN3,OR8D4,OR4Q3	789	89	112	26	0.000151812
IGSF9B,CLCNKB,KCNH7	821	97	80	18	0.000151854
TMEM67,CNGA2,IL2RB	690	72	211	43	0.000152017
TMEM67,KCNH7,PCDHGB3	668	71	233	44	0.000152333
TMEM67,TENM1,FREM2	680	69	221	46	0.000152389
TMEM67,WNT5A,FZD6	655	69	246	46	0.000153156
CNGA2,TMEM131,GRIK2	811	93	90	22	0.000153335
CNGA2,KCNH7,TENM1	821	93	80	22	0.000153514
TMEM67,WNT5A,SLC30A8	635	62	266	53	0.000154328
TMEM67,SLC30A8,DNAJC16	624	60	277	55	0.000154496
CNGA2,SLC30A8,TMEM131	658	66	243	49	0.000155178
TMEM67,TMEM131,KCNH7	672	73	229	42	0.000155451
CNGA2,SLC30A8,TRPV2	670	65	231	50	0.000155915
TMEM67,IGSF9B,LRRN2	571	60	330	55	0.00015605
CNGA2,IGSF9B,TAAR2	820	93	81	22	0.000157089
CNGA2,TMEM81,TENM1	687	73	214	42	0.000157434
TMEM67,STAB1,TECRL	677	71	224	44	0.000160421
CNGA2,SLC30A8,GRM8	667	66	234	49	0.000161204
IGSF9B,TMEM131,TRPV2	817	96	84	19	0.000161292
CLCN3,STAB1,CDON	788	87	113	28	0.000161734
TMEM67,TRHR,TECRL	647	65	254	50	0.000161853
STAB1,SLC30A8,CLCNKB	668	68	233	47	0.00016321
CLCN3,WNT5A,CLCNKB	801	94	100	21	0.000163331
CNGA2,TMEM131,NRXN3	818	95	83	20	0.000163722
TMEM67,TMEM131,LRRN2	563	60	338	55	0.000164287
TMEM67,OR8D4,TMEM68	616	62	285	53	0.000165487
DNAJC16,TMEM131,ANKRD46	652	69	249	46	0.00016696
TMEM67,CNGA2,FZD6	653	69	248	46	0.000167012
TMEM67,SLC30A8,CLCNKB	633	62	268	53	0.000167199
CNGA2,CDON,CLCNKB	821	91	80	24	0.0001674
CNGA2,STAB1,ABCA13	801	86	100	29	0.000167549
CNGA2,OR8D4,KCNH7	815	92	86	23	0.000167704
CLCN3,CDON,CLCNKB	790	89	111	26	0.000168633
WNT5A,OR8D4,GRIK2	812	91	89	24	0.000169765
CNGA2,TMEM131,OR4Q3	819	95	82	20	0.000169854
TMEM67,CNGA2,FREM2	683	71	218	44	0.000170136
WNT5A,CNGA2,PCDHGB3	819	94	82	21	0.000170149
TMEM67,WNT5A,FREM2	685	71	216	44	0.000170441
TMEM67,DNAJC16,OR4Q3	671	69	230	46	0.000170685
TMEM81,TRHR,TENM1	578	55	323	60	0.000172149
CNGA2,STAB1,MAL2	651	61	250	54	0.000172573
TMEM131,CDON,CLCNKB	810	94	91	21	0.000173041
TMEM131,CLCNKB,TRPV2	816	97	85	18	0.000174322
STAB1,CLCNKB,TAAR2	818	95	83	20	0.000174919
TMEM67,TMEM81,NRXN3	566	58	335	57	0.000175174
TMEM67,GRM8,ABCA13	662	67	239	48	0.000175369
TMEM67,TMEM81,ADIPOR1	534	52	367	63	0.000176637
CLCN3,STAB1,TECRL	794	91	107	24	0.000176765
CNGA2,CDON,TENM1	815	88	86	27	0.000176813
SLC30A8,TMEM131,CLCNKB	659	68	242	47	0.000176836
CLCN3,OR8D4,TMEM68	674	69	227	46	0.000177619
CNGA2,STAB1,TECRL	821	94	80	21	0.000177849
TMEM81,TRHR,LRRN2	567	56	334	59	0.000178905
CNGA2,TMEM131,CLCNKB	819	96	82	19	0.000180143
CNGA2,DNAJC16,TRPV2	812	90	89	25	0.000180533
CLCN3,GRM8,KCNH7	791	92	110	23	0.000180648
IGSF9B,STAB1,GRIK2	820	92	81	23	0.000181233
STAB1,TMEM131,KCNH7	815	97	86	18	0.000181407
WNT5A,STAB1,OR8D4	818	93	83	22	0.00018166
TMEM67,ERVMER34-1,OR4Q3	695	74	206	41	0.000182343
TMEM67,SLC30A8,GRM8	628	62	273	53	0.000182402
TMEM67,TMEM131,TAAR2	674	72	227	43	0.000182462
IGSF9B,STAB1,TECRL	820	94	81	21	0.000182505
TMEM67,CDON,OR4Q3	672	69	229	46	0.000182689
TMEM67,OR8D4,TMEM81	554	56	347	59	0.000182942
TMEM67,TECRL,NRXN3	676	72	225	43	0.000183696
STAB1,OR8D4,TMEM131	808	93	93	22	0.000184344
STAB1,TMEM131,OR4Q3	819	96	82	19	0.000184915
TMEM67,TRHR,OR4Q3	651	65	250	50	0.0001852
CNGA2,SLC30A8,ABCA13	651	61	250	54	0.000185514
TMEM67,DNAJC16,ANKRD46	635	66	266	49	0.000185814
CLCN3,SLC30A8,OR8D4	651	64	250	51	0.000186774
STAB1,CDON,GRIK2	806	89	95	26	0.000186852
CLCN3,IGSF9B,TMEM68	681	71	220	44	0.000186893
TMEM67,CLCNKB,OR4Q3	688	73	213	42	0.000186961
TMEM67,KCNH7,TAAR2	674	72	227	43	0.000187849
CLCN3,CLCNKB,TECRL	794	93	107	22	0.000188145
IGSF9B,OR8D4,DNAJC16	808	91	93	24	0.000188197
WNT5A,TMEM131,CLCNKB	821	99	80	16	0.000188259
CLCN3,GRM8,GRIK2	789	89	112	26	0.000188509
IGSF9B,CLCNKB,ERVMER34-1	842	100	59	15	0.000188558
IGSF9B,OR8D4,SCN1A	828	94	73	21	0.000188567
TMEM67,CDON,IL2RB	674	68	227	47	0.000189339
TMEM67,IGSF9B,FREM2	685	72	216	43	0.000189923
CNGA2,SLC30A8,ERVMER34-1	682	68	219	47	0.000190096
SLC30A8,TENM1,ADIPOR1	546	50	355	65	0.000190231
CLCN3,STAB1,NRXN3	798	91	103	24	0.000190663
IGSF9B,CLCNKB,TECRL	817	96	84	19	0.000190735
CNGA2,STAB1,TRHR	692	69	209	46	0.000191236
CNGA2,KCNH7,TAAR2	814	94	87	21	0.000192824
CLCN3,GRIK2,TENM1	802	90	99	25	0.000193036
CNGA2,SLC30A8,SCN1A	672	65	229	50	0.000193291
TMEM67,TRHR,ABCA13	636	62	265	53	0.000194063
CNGA2,GRM8,ERVMER34-1	838	96	63	19	0.000194581
IGSF9B,GRM8,TECRL	812	93	89	22	0.000195365
TMEM67,CDON,LRRN2	559	57	342	58	0.000195872
CLCN3,DNAJC16,ANKRD46	641	67	260	48	0.000197106
STAB1,DNAJC16,PCDHGB3	795	89	106	26	0.00019715
IGSF9B,STAB1,NRXN3	829	95	72	20	0.000197327
TMEM67,STAB1,ABCA13	665	66	236	49	0.000199098
TMEM67,TMEM68,PCDHGB3	612	62	289	53	0.000199422
STAB1,TMEM131,NRXN3	817	96	84	19	0.000199673
CNGA2,TRPV2,TECRL	821	95	80	20	0.000200437
TMEM67,TMEM81,CLCNKB	566	58	335	57	0.000200655
CLCN3,CNGA2,NIPAL2	681	70	220	45	0.000201531
TMEM67,CDON,ABCA13	656	65	245	50	0.000203349
MAL2,TENM1,LRRN2	550	52	351	63	0.000203656
CLCN3,SLC30A8,TENM1	663	66	238	49	0.000204589
TMEM67,OR8D4,IL2RB	678	69	223	46	0.000204689
STAB1,DNAJC16,FZD6	670	70	231	45	0.000205096
IGSF9B,DNAJC16,GRM8	806	90	95	25	0.000205186
TMEM67,SLC30A8,GRIK2	630	62	271	53	0.000205919
WNT5A,GRIK2,TAAR2	815	93	86	22	0.000205996
CNGA2,TMEM81,TMEM131	676	75	225	40	0.000206081
IGSF9B,ERVMER34-1,OR4Q3	842	99	59	16	0.000206428
IGSF9B,GRM8,NRXN3	823	94	78	21	0.000207954
IGSF9B,TMEM81,GRM8	679	75	222	40	0.000208293
TMEM67,SLC30A8,TMEM131	623	62	278	53	0.00020965
CLCN3,IGSF9B,SCN1A	797	90	104	25	0.000209787
TMEM67,OR4Q3,SCN1A	684	71	217	44	0.000210281
TMEM67,TMEM81,TAAR2	560	57	341	58	0.000210475
CNGA2,SLC30A8,TRHR	665	64	236	51	0.000211158
CLCN3,OR8D4,PCDHGB3	780	88	121	27	0.00021125
CLCN3,CNGA2,MAL2	638	59	263	56	0.000211412
CLCN3,CNGA2,ANKRD46	649	68	252	47	0.000211826
CNGA2,SLC30A8,OR4Q3	670	66	231	49	0.000211868
CNGA2,IGSF9B,TMEM68	691	71	210	44	0.000212318
CLCN3,OR8D4,DNAJC16	776	86	125	29	0.000213276
TMEM67,TMEM81,KCNH7	560	58	341	57	0.000213435
IGSF9B,OR8D4,TECRL	819	95	82	20	0.000213648
IGSF9B,TMEM131,TECRL	808	96	93	19	0.00021366
TMEM67,CDON,FREM2	675	69	226	46	0.000213984
CLCN3,SLC30A8,ERVMER34-1	668	68	233	47	0.000214018
CLCN3,PCDHGB3,TAAR2	778	89	123	26	0.000215763
IGSF9B,OR8D4,KCNH7	825	97	76	18	0.000216242
IGSF9B,DNAJC16,ANKRD46	654	68	247	47	0.000217391
TMEM67,SLC30A8,TAAR2	626	61	275	54	0.000217585
STAB1,OR8D4,ERVMER34-1	831	95	70	20	0.000217689
TMEM67,CLCN3,KCNT2	667	69	234	46	0.000217711
TMEM67,OR4Q3,NRXN3	681	72	220	43	0.000218802
SLC30A8,TMEM81,TMEM131	547	55	354	60	0.000219998
CLCN3,DNAJC16,GRIK2	777	86	124	29	0.000220897
STAB1,TMEM131,CDON	808	92	93	23	0.000221698
SLC30A8,TMEM131,ADIPOR1	534	51	367	64	0.00022244
WNT5A,GRIK2,ERVMER34-1	834	97	67	18	0.000223444
CLCN3,CNGA2,TMEM68	680	70	221	45	0.000223518
CLCN3,MAL2,ADIPOR1	524	47	377	68	0.000224692
GRM8,TMEM131,CLCNKB	811	96	90	19	0.00022482
CLCN3,SLC30A8,TMEM68	594	56	307	59	0.000225374
TMEM67,TMEM131,OR4Q3	677	73	224	42	0.000225573
SLC30A8,CLCNKB,TENM1	670	67	231	48	0.000225616
WNT5A,STAB1,TECRL	820	96	81	19	0.000226929
TMEM67,LRRN2,PCDHGB3	561	59	340	56	0.000227457
TMEM67,NIPAL2,ADIPOR1	539	51	362	64	0.000227541
OR8D4,DNAJC16,GRIK2	793	86	108	29	0.000227896
CLCN3,KCNH7,TAAR2	786	92	115	23	0.000228762
CLCN3,STAB1,TAAR2	789	90	112	25	0.000229256
TMEM67,ABCA13,PCDHGB3	655	66	246	49	0.000229407
TMEM67,TMEM68,TRPV2	627	64	274	51	0.000229924
CLCN3,CDON,PCDHGB3	778	87	123	28	0.000230486
WNT5A,KCNH7,TAAR2	813	97	88	18	0.000231721
TMEM67,TECRL,TAAR2	673	72	228	43	0.000232477
MAL2,ADIPOR1,ABCA13	519	46	382	69	0.000232668
TMEM67,SLC30A8,OR8D4	623	60	278	55	0.000234372
DNAJC16,TMEM131,TRPV2	801	92	100	23	0.000234621
TMEM67,STAB1,FZD6	649	68	252	47	0.000234899
STAB1,SLC30A8,ADIPOR1	545	52	356	63	0.000235197
TMEM67,SLC30A8,TRPV2	634	62	267	53	0.000235326
TMEM67,GRM8,FREM2	677	71	224	44	0.000237674
TMEM67,TMEM131,TECRL	672	73	229	42	0.000237681
MAL2,ERVMER34-1,ADIPOR1	538	49	363	66	0.000239229
TMEM67,CNGA2,ANKRD46	642	68	259	47	0.000240471
TMEM81,TMEM131,FZD6	557	58	344	57	0.000240994
IGSF9B,STAB1,TENM1	826	93	75	22	0.000241443
CNGA2,OR8D4,SCN1A	822	91	79	24	0.000241666
TMEM67,WNT5A,TMEM68	626	64	275	51	0.00024194
CNGA2,CDON,OR4Q3	818	90	83	25	0.000242438
CLCN3,STAB1,DNAJC16	784	88	117	27	0.00024341
CNGA2,SLC30A8,TMEM81	557	54	344	61	0.000243624
TMEM67,SCN1A,LRRN2	573	59	328	56	0.000243914
IGSF9B,TMEM131,TENM1	816	95	85	20	0.000245103
TMEM67,IGSF9B,FZD6	649	69	252	46	0.00024624
WNT5A,OR8D4,ERVMER34-1	832	97	69	18	0.000246254
TMEM67,TENM1,ABCA13	666	66	235	49	0.000249332
CNGA2,DNAJC16,ERVMER34-1	829	94	72	21	0.000249574
TMEM67,ANKRD46,TENM1	638	66	263	49	0.00024994
CNGA2,TMEM131,ERVMER34-1	835	99	66	16	0.00025092
OR8D4,TMEM131,TECRL	798	93	103	22	0.000251072
CNGA2,IGSF9B,PCDHGB3	817	93	84	22	0.000251255
TMEM81,TENM1,SLC45A4	569	55	332	60	0.000251489
CNGA2,STAB1,NIPAL2	697	72	204	43	0.000251504
CLCN3,IGSF9B,TAAR2	789	91	112	24	0.000252042
CLCN3,IGSF9B,CDON	798	91	103	24	0.000252261
CNGA2,SLC30A8,KCNH7	667	67	234	48	0.000252381
TMEM67,GRIK2,OR4Q3	683	72	218	43	0.000252458
STAB1,MAL2,DNAJC16	647	62	254	53	0.000255541
WNT5A,OR8D4,SCN1A	821	93	80	22	0.000255972
DNAJC16,TMEM131,TECRL	796	93	105	22	0.000256189
DNAJC16,TMEM131,GRIK2	793	90	108	25	0.000256257
CNGA2,CLCNKB,KCNH7	823	96	78	19	0.00025639
TMEM67,FZD6,ADIPOR1	526	52	375	63	0.000256458
TMEM67,CDON,TMEM68	616	62	285	53	0.000257004
TMEM67,DNAJC16,TMEM81	552	55	349	60	0.000258515
TMEM67,TMEM81,GRIK2	564	57	337	58	0.000258692
WNT5A,GRIK2,KCNH7	816	95	85	20	0.000258918
TMEM67,CLCN3,SCN7A	669	69	232	46	0.000259197
CLCN3,WNT5A,SCN1A	803	93	98	22	0.000261044
TMEM81,GRM8,SLC45A4	562	56	339	59	0.000261311
STAB1,ERVMER34-1,PCDHGB3	829	97	72	18	0.000261703
CNGA2,STAB1,PCDHGB3	816	92	85	23	0.000263678
CLCN3,TMEM131,FZD6	663	72	238	43	0.000265867
TMEM67,IL2RB,PCDHGB3	673	70	228	45	0.000265929
STAB1,OR8D4,NRXN3	815	92	86	23	0.000266167
WNT5A,ERVMER34-1,SCN1A	846	100	55	15	0.00026622
TMEM67,LRRN2,TECRL	570	61	331	54	0.000266463
DNAJC16,TMEM131,TENM1	803	92	98	23	0.000266472
CNGA2,GRM8,TMEM131	813	94	88	21	0.0002678
CNGA2,GRM8,TAAR2	813	92	88	23	0.000268786
TMEM67,ADIPOR1,LRRN2	544	55	357	60	0.000268921
CNGA2,MAL2,GRM8	650	61	251	54	0.00026901
MAL2,KCNH7,ADIPOR1	528	48	373	67	0.000269034
WNT5A,STAB1,PCDHGB3	816	95	85	20	0.000269303
SLC30A8,TMEM81,SLC45A4	530	52	371	63	0.000269598
TMEM67,IL2RB,TRPV2	691	72	210	43	0.000270064
TMEM67,OR4Q3,TAAR2	678	72	223	43	0.000270696
WNT5A,TMEM131,TECRL	811	97	90	18	0.000271547
CLCN3,SLC30A8,OR4Q3	656	66	245	49	0.000271907
SLC30A8,DNAJC16,TMEM131	656	67	245	48	0.000272493
TMEM67,GRIK2,TECRL	678	72	223	43	0.000273328
STAB1,GRM8,TMEM131	813	95	88	20	0.000274662
IGSF9B,CDON,GRIK2	820	93	81	22	0.000274718
CNGA2,IGSF9B,ABCA13	804	87	97	28	0.000275078
MAL2,GRM8,ADIPOR1	528	48	373	67	0.000275857
TMEM67,KCNH7,NRXN3	679	73	222	42	0.000277765
STAB1,TMEM131,ERVMER34-1	835	100	66	15	0.000277941
CLCN3,CLCNKB,TAAR2	791	92	110	23	0.0002782
IGSF9B,DNAJC16,TENM1	811	91	90	24	0.000278559
TMEM67,STAB1,FREM2	680	70	221	45	0.000278712
TMEM67,TMEM81,ABCA13	548	55	353	60	0.00027943
CLCN3,WNT5A,FZD6	673	72	228	43	0.000279678
CDON,GRIK2,CLCNKB	809	91	92	24	0.000280461
STAB1,CDON,ERVMER34-1	829	94	72	21	0.0002808
TMEM67,DNAJC16,TMEM68	615	62	286	53	0.000281467
TMEM67,CLCN3,TLR5	571	55	330	60	0.000283956
STAB1,CLCNKB,KCNH7	821	97	80	18	0.00028507
CLCN3,TMEM81,TMEM131	660	74	241	41	0.000285421
TMEM67,KCNH7,LRRN2	567	61	334	54	0.000285888
TMEM67,GRM8,NIPAL2	661	68	240	47	0.00028608
TMEM67,SLC30A8,KCNH7	629	63	272	52	0.000287021
OR8D4,TMEM131,NRXN3	805	94	96	21	0.000287862
MAL2,CLCNKB,ADIPOR1	530	48	371	67	0.000288238
TMEM67,STAB1,IL2RB	686	71	215	44	0.000288977
CNGA2,CLCNKB,ERVMER34-1	845	99	56	16	0.000290801
IGSF9B,GRM8,SCN1A	823	93	78	22	0.000291111
CNGA2,STAB1,GRM8	822	93	79	22	0.000291468
IGSF9B,TMEM131,ERVMER34-1	834	101	67	14	0.000292249
CLCN3,WNT5A,CDON	792	90	109	25	0.00029237
CLCN3,ERVMER34-1,TECRL	810	96	91	19	0.000292422
TMEM67,DNAJC16,TRHR	645	64	256	51	0.00029283
CLCN3,SLC30A8,ADIPOR1	538	51	363	64	0.000293177
WNT5A,GRM8,ERVMER34-1	838	99	63	16	0.000293243
TMEM67,TRHR,NIPAL2	645	63	256	52	0.000293845
TMEM81,FZD6,LRRN2	557	58	344	57	0.000293937
WNT5A,CLCNKB,ERVMER34-1	844	102	57	13	0.000294036
CLCN3,WNT5A,NRXN3	801	94	100	21	0.000294202
CNGA2,TMEM131,SCN1A	821	95	80	20	0.000294829
WNT5A,TMEM131,TENM1	818	96	83	19	0.000295072
CLCN3,STAB1,SLC30A8	657	67	244	48	0.000295126
CLCN3,IGSF9B,TRPV2	796	91	105	24	0.000295239
WNT5A,STAB1,TENM1	825	95	76	20	0.000295242
CNGA2,ERVMER34-1,OR4Q3	844	98	57	17	0.00029536
STAB1,DNAJC16,TAAR2	800	90	101	25	0.00029581
WNT5A,OR8D4,TECRL	809	93	92	22	0.000296169
TMEM67,LRRN2,TAAR2	569	60	332	55	0.000296661
TMEM67,FZD6,TENM1	651	68	250	47	0.000296943
TMEM81,FZD6,TENM1	568	57	333	58	0.000297204
IGSF9B,DNAJC16,TMEM68	679	70	222	45	0.000297839
CNGA2,NIPAL2,TENM1	693	70	208	45	0.000298646
STAB1,SLC30A8,DNAJC16	662	67	239	48	0.000298888
CLCN3,OR8D4,FZD6	663	69	238	46	0.00029927
WNT5A,CNGA2,DNAJC16	815	92	86	23	0.000300299
CNGA2,TRHR,ABCA13	677	67	224	48	0.000300765
CLCN3,OR8D4,ANKRD46	642	66	259	49	0.000300978
CLCN3,ERVMER34-1,SCN1A	813	94	88	21	0.000301366
CNGA2,TENM1,SCN1A	828	93	73	22	0.00030169
WNT5A,IGSF9B,DNAJC16	812	93	89	22	0.000302834
CNGA2,GRIK2,OR4Q3	822	92	79	23	0.000303247
STAB1,CLCNKB,TECRL	819	96	82	19	0.000303661
CLCN3,SLC30A8,GRM8	653	67	248	48	0.000303722
WNT5A,STAB1,NRXN3	827	97	74	18	0.000305916
CNGA2,KCNH7,NRXN3	827	96	74	19	0.000307455
WNT5A,STAB1,SCN1A	830	96	71	19	0.000310055
CNGA2,SLC30A8,GRIK2	671	67	230	48	0.000310786
OR8D4,DNAJC16,ANKRD46	647	66	254	49	0.000310885
CNGA2,GRM8,NRXN3	822	93	79	22	0.000311702
CNGA2,IGSF9B,TRHR	693	70	208	45	0.000312235
CNGA2,SCN1A,TRPV2	833	95	68	20	0.000312584
TMEM67,GRIK2,LRRN2	575	60	326	55	0.00031372
CLCN3,DNAJC16,KCNH7	781	90	120	25	0.000314965
TMEM67,ADIPOR1,ABCA13	538	52	363	63	0.000315281
TMEM67,ERVMER34-1,NIPAL2	679	70	222	45	0.000315521
TMEM67,DNAJC16,FZD6	644	68	257	47	0.000316454
CLCN3,FZD6,TMEM68	615	63	286	52	0.000317156
WNT5A,CLCNKB,KCNH7	823	99	78	16	0.000317193
CLCN3,CLCNKB,TENM1	805	93	96	22	0.000319793
CLCN3,CNGA2,FZD6	670	71	231	44	0.000320529
WNT5A,CLCNKB,TECRL	820	98	81	17	0.000320926
CLCN3,SCN1A,PCDHGB3	788	89	113	26	0.000320962
IGSF9B,DNAJC16,TRPV2	810	91	91	24	0.000321894
CNGA2,TRHR,TMEM68	617	58	284	57	0.000323289
TMEM67,GRM8,ANKRD46	637	68	264	47	0.000323691
WNT5A,ERVMER34-1,TENM1	841	99	60	16	0.000324153
STAB1,DNAJC16,TMEM249	666	65	235	50	0.000325016
TMEM81,GRM8,TENM1	682	75	219	40	0.000325076
STAB1,DNAJC16,CLCNKB	815	93	86	22	0.00032755
CNGA2,TMEM81,TRPV2	683	75	218	40	0.000328353
TMEM67,STAB1,ANKRD46	638	67	263	48	0.000328924
STAB1,OR8D4,GRIK2	811	90	90	25	0.000329874
CNGA2,SLC30A8,ADIPOR1	548	51	353	64	0.000330918
WNT5A,STAB1,OR4Q3	828	97	73	18	0.000330957
SLC30A8,TMEM81,ABCA13	539	52	362	63	0.000331193
TMEM67,OR4Q3,LRRN2	574	61	327	54	0.000331993
CNGA2,TRHR,TENM1	694	69	207	46	0.000333082
TMEM67,SLC30A8,TECRL	628	63	273	52	0.000333216
STAB1,DNAJC16,ANKRD46	654	68	247	47	0.000334669
MAL2,ADIPOR1,TAAR2	525	47	376	68	0.00033469
TMEM67,CLCNKB,TMEM68	628	65	273	50	0.000338968
TMEM131,CLCNKB,OR4Q3	816	98	85	17	0.000340513
WNT5A,CNGA2,TMEM81	684	76	217	39	0.000340855
OR8D4,TMEM131,CLCNKB	806	95	95	20	0.000340984
CLCN3,ADIPOR1,NRXN3	658	72	243	43	0.000341024
CLCN3,OR4Q3,PCDHGB3	788	91	113	24	0.00034155
CNGA2,IGSF9B,TMEM81	685	75	216	40	0.000341643
WNT5A,CNGA2,ABCA13	805	89	96	26	0.000341685
CLCN3,SLC30A8,LRRN2	551	56	350	59	0.000343622
TMEM67,ANKRD46,ADIPOR1	513	51	388	64	0.000344243
DNAJC16,TMEM131,CLCNKB	809	95	92	20	0.000346756
SLC30A8,CLCNKB,TLR5	566	53	335	62	0.000347727
TMEM67,OR8D4,FZD6	641	67	260	48	0.000347792
IGSF9B,DNAJC16,TECRL	802	92	99	23	0.000347801
STAB1,OR8D4,KCNH7	812	93	89	22	0.000348142
TMEM67,ADIPOR1,FREM2	551	54	350	61	0.000348344
STAB1,MAL2,LRRN2	545	53	356	62	0.000349188
CNGA2,GRM8,KCNH7	819	94	82	21	0.000349698
STAB1,SLC30A8,TMEM131	661	69	240	46	0.00035089
TMEM81,CLCNKB,TRHR	576	57	325	58	0.000353276
CNGA2,SLC30A8,TLR5	569	53	332	62	0.000353973
TMEM67,ABCA13,TRPV2	671	68	230	47	0.000354824
WNT5A,CNGA2,ANKRD46	673	71	228	44	0.000354857
CNGA2,MAL2,TRPV2	655	61	246	54	0.000356196
IGSF9B,MAL2,ADIPOR1	527	48	374	67	0.000356415
CLCN3,OR8D4,GRM8	788	89	113	26	0.000357936
WNT5A,IGSF9B,PCDHGB3	816	96	85	19	0.000359111
CNGA2,OR8D4,TENM1	816	90	85	25	0.000359176
CLCN3,CDON,TENM1	796	89	105	26	0.0003598
OR8D4,TMEM131,KCNH7	803	95	98	20	0.000359832
IGSF9B,GRM8,OR4Q3	821	94	80	21	0.000362266
CNGA2,TMEM81,GRIK2	684	73	217	42	0.000362343
STAB1,MAL2,TENM1	653	63	248	52	0.00036328
STAB1,ERVMER34-1,KCNH7	838	100	63	15	0.000366149
TMEM81,TMEM131,TRPV2	670	76	231	39	0.000368024
TMEM81,GRM8,GRIK2	676	73	225	42	0.00036847
IGSF9B,CLCNKB,SCN1A	826	95	75	20	0.000369524
TMEM131,TENM1,NRXN3	816	96	85	19	0.000370277
WNT5A,OR8D4,TMEM131	809	95	92	20	0.000370538
CLCN3,GRIK2,TRPV2	790	89	111	26	0.000370645
IGSF9B,CLCNKB,TRPV2	826	96	75	19	0.000371212
MAL2,DNAJC16,TENM1	650	62	251	53	0.000371393
IGSF9B,STAB1,TRPV2	830	95	71	20	0.0003715
WNT5A,TMEM131,ERVMER34-1	836	102	65	13	0.000372098
DNAJC16,TMEM81,SLC45A4	562	56	339	59	0.000372263
CLCN3,TMEM68,PCDHGB3	673	70	228	45	0.000373346
WNT5A,GRM8,GRIK2	816	93	85	22	0.000373907
CLCN3,SLC30A8,NRXN3	656	67	245	48	0.000374708
TMEM67,CLCN3,ADAM19	667	67	234	48	0.00037481
TMEM67,KCNH7,TECRL	675	74	226	41	0.000375022
CNGA2,SLC30A8,TAAR2	667	66	234	49	0.000376119
TMEM67,NIPAL2,SCN1A	665	67	236	48	0.000377132
IGSF9B,TMEM81,TMEM131	673	77	228	38	0.000377827
MAL2,ADIPOR1,TECRL	525	48	376	67	0.00037887
CLCN3,GRIK2,OR4Q3	792	90	109	25	0.000380271
IGSF9B,CDON,CLCNKB	829	96	72	19	0.000380532
CNGA2,OR8D4,TECRL	811	92	90	23	0.000381014
CLCN3,TRPV2,PCDHGB3	786	90	115	25	0.000382383
WNT5A,GRM8,TAAR2	812	95	89	20	0.000382844
TMEM67,IGSF9B,ANKRD46	638	68	263	47	0.000383263
STAB1,CDON,NRXN3	813	91	88	24	0.000383735
TMEM81,TMEM131,CLCNKB	672	77	229	38	0.00038439
WNT5A,TMEM131,OR4Q3	819	98	82	17	0.000384939
TMEM67,SCN1A,TECRL	681	72	220	43	0.000385126
TMEM81,FZD6,ABCA13	549	55	352	60	0.000385426
CLCN3,SLC30A8,TLR5	556	52	345	63	0.000385624
CNGA2,NIPAL2,TAAR2	691	71	210	44	0.000385729
STAB1,OR8D4,CLCNKB	816	93	85	22	0.000385882
CNGA2,TMEM131,TECRL	812	96	89	19	0.000386424
CNGA2,OR8D4,TAAR2	811	91	90	24	0.000386799
DNAJC16,TMEM131,PCDHGB3	790	92	111	23	0.000386804
MAL2,TMEM81,TENM1	549	51	352	64	0.000387182
TMEM81,GRM8,ABCA13	658	72	243	43	0.000388051
CLCN3,IGSF9B,SLC30A8	656	67	245	48	0.000388318
CLCN3,CDON,TMEM68	674	69	227	46	0.000388804
STAB1,TRHR,ABCA13	673	67	228	48	0.000389141
CNGA2,SLC30A8,OR8D4	664	65	237	50	0.000390098
TMEM67,DNAJC16,LRRN2	560	58	341	57	0.00039102
TMEM67,ADIPOR1,TMEM68	502	49	399	66	0.000391364
CLCN3,WNT5A,TMEM68	683	72	218	43	0.000392065
TMEM81,TENM1,LRRN2	673	75	228	40	0.000392217
SLC30A8,DNAJC16,GRM8	662	67	239	48	0.000392583
CLCN3,ERVMER34-1,FZD6	683	74	218	41	0.000393089
CNGA2,TENM1,TECRL	816	93	85	22	0.000393363
CLCN3,KCNH7,NRXN3	798	94	103	21	0.000394354
TMEM67,ERVMER34-1,IL2RB	699	74	202	41	0.000394868
TMEM67,OR8D4,KCNT2	673	70	228	45	0.000395205
DNAJC16,GRM8,TMEM131	798	92	103	23	0.000395813
CLCN3,ERVMER34-1,NRXN3	814	96	87	19	0.000395969
TMEM67,IGSF9B,ABCA13	667	68	234	47	0.000396753
CNGA2,SLC30A8,NIPAL2	652	64	249	51	0.000397299
TMEM67,SLC30A8,CDON	622	61	279	54	0.000397727
WNT5A,IGSF9B,TRPV2	829	97	72	18	0.000399004
IGSF9B,ERVMER34-1,TRPV2	844	99	57	16	0.000401785
TMEM67,OR8D4,NIPAL2	658	66	243	49	0.000404118
TMEM67,GRM8,FZD6	648	70	253	45	0.000405588
WNT5A,STAB1,DNAJC16	811	93	90	22	0.000405887
CNGA2,STAB1,SCN1A	830	94	71	21	0.000407901
SLC30A8,DNAJC16,TENM1	666	67	235	48	0.000408107
MAL2,ADIPOR1,TRPV2	531	48	370	67	0.000408135
CNGA2,TMEM81,GRM8	682	75	219	40	0.000408995
DNAJC16,ANKRD46,TAAR2	649	68	252	47	0.000409651
CLCN3,OR8D4,CDON	791	89	110	26	0.000409713
TMEM67,NIPAL2,PCDHGB3	653	67	248	48	0.000409748
GRM8,GRIK2,TAAR2	810	91	91	24	0.000409813
CNGA2,TRHR,TAAR2	693	70	208	45	0.000410364
CLCN3,CDON,KCNH7	786	90	115	25	0.000410722
WNT5A,OR8D4,KCNH7	814	95	87	20	0.000411206
TMEM67,CLCNKB,IL2RB	693	73	208	42	0.000413027
TMEM67,CLCN3,PLXNC1	654	68	247	47	0.000414184
STAB1,DNAJC16,CDON	796	87	105	28	0.000415027
CNGA2,ANKRD46,TAAR2	658	69	243	46	0.000415388
OR8D4,TMEM131,GRIK2	800	92	101	23	0.000416141
CLCN3,CDON,TECRL	783	89	118	26	0.000417048
CLCN3,ERVMER34-1,TRPV2	811	95	90	20	0.000417954
STAB1,TMEM131,PCDHGB3	805	95	96	20	0.000418027
OR8D4,GRIK2,NRXN3	811	91	90	24	0.000418244
TMEM67,NIPAL2,TRPV2	673	69	228	46	0.000419397
IGSF9B,TMEM131,CDON	817	96	84	19	0.00042011
CNGA2,OR4Q3,NRXN3	829	95	72	20	0.000421279
DNAJC16,GRIK2,OR4Q3	802	89	99	26	0.000422049
CNGA2,MAL2,DNAJC16	650	61	251	54	0.000422076
STAB1,MAL2,ABCA13	638	60	263	55	0.000423532
CDON,CLCNKB,TECRL	809	93	92	22	0.000423899
CLCN3,DNAJC16,PCDHGB3	775	88	126	27	0.000424484
CLCN3,SLC30A8,SCN1A	656	65	245	50	0.000424485
CLCN3,LRRN2,NRXN3	677	77	224	38	0.000424641
CNGA2,OR8D4,TRPV2	820	92	81	23	0.00042616
CNGA2,GRM8,CDON	813	89	88	26	0.000427976
IGSF9B,PCDHGB3,TECRL	808	95	93	20	0.000428438
TMEM67,SCN1A,IL2RB	687	71	214	44	0.000428568
IGSF9B,STAB1,SCN1A	828	94	73	21	0.000431854
MAL2,DNAJC16,ADIPOR1	527	48	374	67	0.000433232
TMEM67,NIPAL2,TAAR2	661	68	240	47	0.000435494
CNGA2,CDON,ABCA13	794	85	107	30	0.000435574
STAB1,SLC30A8,ABCA13	651	64	250	51	0.000436503
TMEM67,TMEM68,NRXN3	621	64	280	51	0.000437519
IGSF9B,STAB1,ABCA13	803	88	98	27	0.000437755
TRHR,TENM1,ADIPOR1	563	53	338	62	0.000437788
IGSF9B,GRM8,ABCA13	796	87	105	28	0.0004381
CNGA2,DNAJC16,TENM1	812	90	89	25	0.000439963
OR8D4,MAL2,ADIPOR1	525	47	376	68	0.000439991
CLCN3,TMEM131,TMEM68	675	72	226	43	0.00044043
STAB1,MAL2,CLCNKB	655	64	246	51	0.000440643
SLC30A8,TENM1,LRRN2	566	57	335	58	0.000440777
WNT5A,TENM1,NRXN3	829	97	72	18	0.000442862
TMEM67,ERVMER34-1,ABCA13	681	70	220	45	0.000444467
TMEM81,SLC45A4,LRRN2	567	58	334	57	0.00044447
STAB1,GRIK2,CLCNKB	815	93	86	22	0.00044449
TMEM67,GRIK2,NIPAL2	664	68	237	47	0.000444559
WNT5A,PCDHGB3,TECRL	810	96	91	19	0.000444659
CLCN3,GRM8,PCDHGB3	785	90	116	25	0.000445075
TMEM67,TMEM131,NIPAL2	661	69	240	46	0.000445107
TMEM67,CLCN3,SEMA3D	667	69	234	46	0.000446631
IGSF9B,CLCNKB,OR4Q3	826	97	75	18	0.00044717
CLCN3,TMEM131,TRHR	673	71	228	44	0.000447863
STAB1,TMEM131,TECRL	812	96	89	19	0.000448022
STAB1,PCDHGB3,TECRL	809	94	92	21	0.0004483
SLC30A8,TMEM81,TENM1	561	55	340	60	0.000448473
OR8D4,GRIK2,ERVMER34-1	826	94	75	21	0.000449386
CNGA2,TMEM81,SLC45A4	572	57	329	58	0.000449677
CNGA2,GRIK2,CLCNKB	821	93	80	22	0.0004498
CNGA2,SLC30A8,PCDHGB3	660	66	241	49	0.000450263
SLC30A8,TMEM131,TENM1	662	68	239	47	0.000450952
IGSF9B,DNAJC16,PCDHGB3	797	91	104	24	0.000454498
SLC30A8,CLCNKB,SCN1A	670	67	231	48	0.000455021
TMEM67,WNT5A,ANKRD46	647	69	254	46	0.000455361
CLCN3,GRM8,TENM1	803	92	98	23	0.000455763
CLCN3,TENM1,OR4Q3	806	93	95	22	0.000456189
CLCN3,OR8D4,TRPV2	789	89	112	26	0.00045626
STAB1,SLC30A8,LRRN2	560	58	341	57	0.000456485
TMEM67,TENM1,TLR5	579	55	322	60	0.000456645
TMEM67,IL2RB,NRXN3	685	72	216	43	0.000458536
SLC30A8,ADIPOR1,ABCA13	530	49	371	66	0.000458832
TMEM67,ERVMER34-1,TMEM68	633	66	268	49	0.000459154
IGSF9B,SLC30A8,CLCNKB	670	69	231	46	0.000459193
TMEM67,TMEM68,SCN1A	626	64	275	51	0.000459517
DNAJC16,ERVMER34-1,OR4Q3	826	96	75	19	0.00045972
IGSF9B,GRM8,PCDHGB3	809	93	92	22	0.000460683
DNAJC16,TMEM131,ERVMER34-1	819	97	82	18	0.000462347
TMEM67,TMEM81,PCDHGB3	551	57	350	58	0.000462602
TMEM67,DNAJC16,IL2RB	673	69	228	46	0.000462654
TMEM131,CLCNKB,TENM1	814	96	87	19	0.000464236
TMEM67,DNAJC16,ABCA13	655	65	246	50	0.000464538
IGSF9B,ERVMER34-1,SCN1A	843	98	58	17	0.000464791
TMEM67,CDON,KCNT2	670	69	231	46	0.000464848
TMEM67,PCDHGB3,FREM2	668	70	233	45	0.00046602
TMEM67,ANKRD46,TRHR	629	64	272	51	0.000466698
TMEM67,FZD6,TRPV2	655	70	246	45	0.000467655
CLCN3,CDON,NRXN3	789	89	112	26	0.000467726
CLCN3,STAB1,FZD6	669	71	232	44	0.000468076
CNGA2,SLC30A8,LRRN2	565	57	336	58	0.000468903
STAB1,DNAJC16,SLC45A4	670	69	231	46	0.000469304
CLCN3,DNAJC16,OR4Q3	786	90	115	25	0.000471355
TRHR,TMEM68,ABCA13	607	58	294	57	0.000471433
TMEM131,CLCNKB,ERVMER34-1	833	102	68	13	0.000471675
GRM8,TMEM131,GRIK2	803	93	98	22	0.000471923
TMEM81,TMEM131,SLC45A4	562	58	339	57	0.000473224
TMEM67,TRHR,TMEM68	597	58	304	57	0.000473972
TMEM67,OR8D4,ABCA13	659	66	242	49	0.000476511
DNAJC16,FZD6,TMEM68	615	63	286	52	0.000477416
CLCN3,KCNH7,OR4Q3	798	94	103	21	0.000477605
TMEM67,KCNH7,OR4Q3	679	74	222	41	0.00047787
DNAJC16,TMEM131,FZD6	668	73	233	42	0.000479148
CLCN3,IGSF9B,ADIPOR1	650	71	251	44	0.000480261
ANKRD46,TENM1,LRRN2	550	58	351	57	0.000480505
TMEM67,TMEM81,TECRL	562	59	339	56	0.000481983
WNT5A,STAB1,CDON	818	93	83	22	0.000482927
CLCN3,DNAJC16,ERVMER34-1	800	93	101	22	0.00048312
TMEM67,SLC30A8,LRRN2	530	53	371	62	0.000483159
TMEM67,OR8D4,LRRN2	567	60	334	55	0.000483499
WNT5A,TENM1,SCN1A	829	96	72	19	0.000483519
CLCN3,FZD6,LRRN2	561	60	340	55	0.000484311
STAB1,GRIK2,TAAR2	814	92	87	23	0.000484586
CLCN3,GRIK2,SCN1A	794	89	107	26	0.000484957
TMEM67,TRPV2,FREM2	686	72	215	43	0.000485406
CLCN3,GRM8,TAAR2	786	91	115	24	0.000485843
WNT5A,CNGA2,TMEM68	692	72	209	43	0.000486232
SLC30A8,DNAJC16,OR4Q3	665	67	236	48	0.000486726
CLCN3,CLCNKB,ANKRD46	653	70	248	45	0.000487249
CNGA2,IGSF9B,MAL2	653	62	248	53	0.000488054
IGSF9B,TMEM131,PCDHGB3	804	96	97	19	0.000489751
CLCN3,TMEM131,ANKRD46	645	70	256	45	0.000489984
TMEM81,TRHR,SLC45A4	537	51	364	64	0.00049067
STAB1,ABCA13,PCDHGB3	790	87	111	28	0.000491602
TMEM67,TMEM131,IL2RB	681	73	220	42	0.000495098
CLCN3,CDON,OR4Q3	788	89	113	26	0.000496268
TMEM67,GRIK2,IL2RB	686	72	215	43	0.000496699
IGSF9B,DNAJC16,CLCNKB	817	94	84	21	0.000497877
CNGA2,ERVMER34-1,TRHR	707	73	194	42	0.000498343
CLCN3,OR4Q3,NRXN3	799	93	102	22	0.000499524
IGSF9B,GRM8,TAAR2	813	94	88	21	0.000500013
TMEM67,STAB1,MAL2	619	60	282	55	0.000502522
TMEM67,ERVMER34-1,FZD6	664	72	237	43	0.00050437
TMEM67,TRHR,IL2RB	654	65	247	50	0.000504936
CNGA2,CDON,TMEM68	684	69	217	46	0.000505083
TMEM67,TMEM131,TMEM68	617	65	284	50	0.000506105
CNGA2,GRM8,CLCNKB	823	94	78	21	0.000507683
CNGA2,SLC30A8,TECRL	668	68	233	47	0.000508437
CNGA2,CLCNKB,TAAR2	822	95	79	20	0.00050914
SLC30A8,CLCNKB,ADIPOR1	543	52	358	63	0.000509284
TMEM67,TMEM81,OR4Q3	565	59	336	56	0.000509768
STAB1,TMEM81,TRHR	573	56	328	59	0.000509832
SLC30A8,ADIPOR1,LRRN2	534	52	367	63	0.000511138
SLC30A8,TENM1,ABCA13	653	63	248	52	0.000513766
CNGA2,CLCNKB,OR4Q3	830	96	71	19	0.000514425
STAB1,SLC30A8,PCDHGB3	659	68	242	47	0.000516885
CLCN3,KCNH7,TECRL	792	94	109	21	0.000516913
STAB1,CDON,TECRL	807	91	94	24	0.000517524
CNGA2,ERVMER34-1,SCN1A	847	98	54	17	0.000517801
WNT5A,GRM8,TMEM131	815	97	86	18	0.000517998
IGSF9B,ERVMER34-1,TENM1	842	98	59	17	0.000518826
TMEM67,SCN1A,ABCA13	667	67	234	48	0.000519672
CNGA2,TMEM131,TAAR2	811	95	90	20	0.000520183
CLCN3,TENM1,TAAR2	800	92	101	23	0.000520449
TMEM67,CDON,FZD6	641	67	260	48	0.000520654
TMEM67,OR8D4,KCNV1	638	63	263	52	0.0005219
CLCN3,OR8D4,FREM2	796	92	105	23	0.000522497
CNGA2,OR8D4,DNAJC16	802	88	99	27	0.000522825
MAL2,ADIPOR1,NRXN3	531	49	370	66	0.000522913
ANKRD46,TENM1,ADIPOR1	530	52	371	63	0.000523131
TMEM67,OR8D4,ANKRD46	631	66	270	49	0.000523448
SLC30A8,GRM8,TMEM131	657	69	244	46	0.000524425
WNT5A,CDON,GRIK2	811	92	90	23	0.000525065
OR8D4,SCN1A,NRXN3	817	92	84	23	0.000525453
TMEM67,CLCNKB,ABCA13	672	69	229	46	0.000526618
TMEM81,GRM8,LRRN2	669	76	232	39	0.000526688
CLCN3,SLC30A8,KCNH7	655	68	246	47	0.000527497
TMEM81,TENM1,SCN1A	688	76	213	39	0.000527687
WNT5A,KCNH7,TECRL	816	98	85	17	0.000529537
SLC30A8,DNAJC16,ADIPOR1	541	51	360	64	0.000530809
WNT5A,ERVMER34-1,OR4Q3	842	101	59	14	0.000532043
WNT5A,IGSF9B,NRXN3	831	98	70	17	0.000532217
TMEM81,GRM8,TRHR	571	57	330	58	0.00053346
MAL2,ADIPOR1,TMEM68	491	44	410	71	0.0005339
MAL2,TMEM81,TMEM131	537	52	364	63	0.000534029
CLCN3,TENM1,ADIPOR1	661	72	240	43	0.000534244
CLCN3,MAL2,TENM1	645	62	256	53	0.000535548
TMEM67,TENM1,KCNT2	681	70	220	45	0.000535986
SLC30A8,OR8D4,DNAJC16	656	65	245	50	0.000536049
CLCN3,KCNH7,TRPV2	794	93	107	22	0.000536288
TMEM81,TRHR,OR4Q3	579	57	322	58	0.000536389
STAB1,OR8D4,TECRL	810	92	91	23	0.000537124
IGSF9B,GRIK2,KCNH7	818	95	83	20	0.000537602
IGSF9B,TRPV2,TECRL	818	95	83	20	0.000538718
STAB1,ERVMER34-1,OR4Q3	841	99	60	16	0.000538845
CLCN3,GRIK2,TECRL	788	90	113	25	0.000540282
IGSF9B,DNAJC16,SCN1A	813	92	88	23	0.0005404
TMEM81,TMEM131,OR4Q3	676	77	225	38	0.00054083
CLCN3,SLC30A8,FZD6	641	65	260	50	0.000542954
DNAJC16,ANKRD46,TENM1	656	69	245	46	0.000546545
FZD6,TENM1,ADIPOR1	554	55	347	60	0.000548784
CNGA2,ANKRD46,TENM1	663	69	238	46	0.000549693
SLC30A8,TRHR,TLR5	567	52	334	63	0.000549951
SLC30A8,TMEM81,LRRN2	550	56	351	59	0.000550603
OR8D4,ERVMER34-1,SCN1A	832	95	69	20	0.000550635
SLC30A8,GRM8,CLCNKB	667	69	234	46	0.000551137
WNT5A,GRIK2,SCN1A	825	94	76	21	0.00055235
IGSF9B,DNAJC16,FZD6	673	72	228	43	0.000552906
CNGA2,GRIK2,SCN1A	826	92	75	23	0.000553166
CLCN3,OR8D4,TRHR	675	68	226	47	0.000553219
CLCN3,OR8D4,KCNV1	663	67	238	48	0.000553547
DNAJC16,ANKRD46,ADIPOR1	526	52	375	63	0.000554053
CNGA2,OR4Q3,TAAR2	819	94	82	21	0.000554077
DNAJC16,ANKRD46,ABCA13	637	65	264	50	0.000555818
CLCN3,GRIK2,LRRN2	668	74	233	41	0.000556636
CLCN3,CNGA2,ADIPOR1	657	71	244	44	0.000556645
SLC30A8,CLCNKB,ERVMER34-1	683	71	218	44	0.000558781
CNGA2,DNAJC16,TAAR2	806	90	95	25	0.000563613
CNGA2,IGSF9B,ANKRD46	662	70	239	45	0.000563696
CLCN3,TENM1,TECRL	801	93	100	22	0.000564221
IGSF9B,OR8D4,NRXN3	830	97	71	18	0.00056567
CLCN3,WNT5A,ANKRD46	655	70	246	45	0.000566561
TMEM67,TRHR,FZD6	642	66	259	49	0.000566776
IGSF9B,ERVMER34-1,PCDHGB3	831	99	70	16	0.0005681
WNT5A,STAB1,GRM8	823	96	78	19	0.000568128
WNT5A,GRIK2,TENM1	819	93	82	22	0.000570077
STAB1,MAL2,TMEM249	613	57	288	58	0.0005703
STAB1,CDON,PCDHGB3	803	90	98	25	0.000570629
CNGA2,TENM1,OR4Q3	825	93	76	22	0.000571663
CNGA2,OR8D4,MAL2	646	60	255	55	0.000572018
TMEM131,TENM1,ADIPOR1	656	72	245	43	0.000572284
DNAJC16,GRIK2,KCNH7	797	90	104	25	0.000573445
SLC30A8,TENM1,TLR5	569	53	332	62	0.000573452
SLC30A8,ABCA13,PCDHGB3	643	63	258	52	0.000573478
SLC30A8,KCNH7,ADIPOR1	546	53	355	62	0.000573668
TMEM67,WNT5A,KCNT2	685	72	216	43	0.000573692
TMEM67,CNGA2,KCNT2	684	72	217	43	0.000573887
CLCN3,CNGA2,ABCA13	783	86	118	29	0.000574206
STAB1,CDON,TAAR2	807	91	94	24	0.00057535
TMEM81,TMEM131,GRIK2	671	75	230	40	0.000575555
CNGA2,MAL2,TMEM81	547	51	354	64	0.000575748
CDON,GRIK2,TAAR2	809	91	92	24	0.000575755
SLC30A8,GRM8,LRRN2	560	58	341	57	0.000576009
GRM8,GRIK2,ERVMER34-1	829	95	72	20	0.000576706
TMEM67,LRRN2,ABCA13	557	58	344	57	0.000577016
TMEM81,TRHR,SCN1A	579	57	322	58	0.000577762
CLCN3,ERVMER34-1,TAAR2	804	95	97	20	0.00057801
STAB1,TMEM81,TMEM131	673	76	228	39	0.000579463
OR8D4,TMEM131,SCN1A	807	93	94	22	0.000579915
TMEM67,FZD6,NRXN3	651	70	250	45	0.000580671
TMEM81,TMEM131,KCNV1	557	56	344	59	0.000581075
WNT5A,CLCNKB,TAAR2	821	98	80	17	0.000581425
WNT5A,ERVMER34-1,PCDHGB3	832	100	69	15	0.000581744
WNT5A,TENM1,TAAR2	819	95	82	20	0.000583611
OR8D4,GRIK2,SCN1A	814	90	87	25	0.000584699
CNGA2,OR8D4,OR4Q3	818	92	83	23	0.000585078
TMEM67,CLCN3,MAL2	610	59	291	56	0.00058717
STAB1,MAL2,TMEM131	644	64	257	51	0.000587264
IGSF9B,OR8D4,CLCNKB	826	97	75	18	0.000587302
DNAJC16,GRM8,ANKRD46	656	70	245	45	0.00058759
WNT5A,GRM8,KCNH7	819	97	82	18	0.000588181
STAB1,TMEM131,GRIK2	809	94	92	21	0.000588385
SLC30A8,TMEM81,CLCNKB	555	56	346	59	0.000588524
CLCN3,MAL2,DNAJC16	635	61	266	54	0.000588967
SLC30A8,CLCNKB,ABCA13	651	64	250	51	0.000590117
OR8D4,CDON,GRIK2	811	91	90	24	0.000590147
IGSF9B,GRIK2,ERVMER34-1	836	97	65	18	0.000590147
CLCN3,STAB1,MAL2	640	62	261	53	0.000590276
TMEM67,CNGA2,MAL2	622	60	279	55	0.000590445
CNGA2,DNAJC16,TECRL	806	92	95	23	0.000591147
TMEM67,CDON,NIPAL2	658	66	243	49	0.000591515
CLCN3,GRM8,NRXN3	795	92	106	23	0.000592243
OR8D4,GRIK2,TAAR2	810	91	91	24	0.00059339
IGSF9B,KCNH7,TECRL	817	97	84	18	0.00059347
WNT5A,CNGA2,FZD6	689	74	212	41	0.000593605
WNT5A,KCNH7,TENM1	822	97	79	18	0.000593823
CNGA2,MAL2,LRRN2	551	53	350	62	0.00059685
TMEM81,KCNV1,ABCA13	550	53	351	62	0.000596865
TMEM67,DNAJC16,NIPAL2	656	67	245	48	0.000597001
TMEM67,NIPAL2,KCNH7	665	70	236	45	0.000598188
CLCN3,ERVMER34-1,LRRN2	684	79	217	36	0.000598441
WNT5A,SLC30A8,ADIPOR1	548	53	353	62	0.000598782
IGSF9B,TMEM131,SCN1A	817	96	84	19	0.000600613
DNAJC16,TMEM81,TMEM131	662	74	239	41	0.000601138
TMEM81,KCNV1,LRRN2	557	56	344	59	0.000602469
CLCN3,OR4Q3,TAAR2	789	92	112	23	0.000602818
CLCNKB,ANKRD46,TAAR2	664	71	237	44	0.000603822
CNGA2,IGSF9B,NIPAL2	696	72	205	43	0.000604246
TMEM67,WNT5A,TLR5	583	57	318	58	0.000605592
TMEM67,TMEM131,ABCA13	662	69	239	46	0.000605822
CNGA2,TRHR,OR4Q3	696	71	205	44	0.000610297
IGSF9B,TMEM131,NRXN3	819	98	82	17	0.000610414
IGSF9B,TENM1,NRXN3	830	96	71	19	0.000610499
SLC30A8,ADIPOR1,OR4Q3	545	52	356	63	0.000610795
WNT5A,TENM1,TECRL	815	95	86	20	0.0006128
SEMA3D,TRPM1,MUSK	802	107	99	8	0.00061303
TMEM81,CLCNKB,SLC45A4	568	58	333	57	0.000614091
STAB1,TMEM131,TAAR2	809	96	92	19	0.000614655
TRHR,TENM1,LRRN2	584	59	317	56	0.000615184
TMEM131,CDON,GRIK2	798	92	103	23	0.000615836
TMEM67,LRRN2,IL2RB	575	61	326	54	0.000615884
IGSF9B,STAB1,MAL2	654	64	247	51	0.00061695
OR8D4,CLCNKB,TECRL	809	94	92	21	0.000617318
CNGA2,MAL2,ERVMER34-1	666	64	235	51	0.00061948
WNT5A,IGSF9B,TAAR2	819	97	82	18	0.000619804
CNGA2,CLCNKB,TECRL	823	97	78	18	0.000619888
WNT5A,TMEM81,FZD6	566	59	335	56	0.000620553
TMEM67,OR4Q3,TECRL	679	74	222	41	0.000621586
IGSF9B,CLCNKB,TENM1	823	95	78	20	0.00062262
IGSF9B,TMEM131,GRIK2	809	95	92	20	0.000622863
WNT5A,CNGA2,TRHR	700	72	201	43	0.000623489
CNGA2,GRIK2,ABCA13	799	86	102	29	0.000624139
TMEM67,TMEM68,TAAR2	618	64	283	51	0.000624904
STAB1,TMEM81,SLC45A4	569	58	332	57	0.000624997
SLC30A8,TMEM81,GRM8	553	56	348	59	0.000625446
CLCN3,TENM1,LRRN2	680	77	221	38	0.000626109
TMEM67,CLCNKB,FZD6	656	71	245	44	0.000626635
STAB1,DNAJC16,ABCA13	785	85	116	30	0.00063122
CNGA2,MAL2,TAAR2	649	61	252	54	0.00063152
CDON,CLCNKB,ERVMER34-1	834	97	67	18	0.000632189
MAL2,ADIPOR1,SCN1A	528	48	373	67	0.000632816
TMEM67,SCN7A,TENM1	681	70	220	45	0.000633052
WNT5A,GRIK2,CLCNKB	818	95	83	20	0.00063399
IGSF9B,GRIK2,TRPV2	821	93	80	22	0.000634013
MAL2,ANKRD46,ADIPOR1	501	47	400	68	0.000634849
TMEM67,IL2RB,TAAR2	682	72	219	43	0.000634909
CLCN3,CLCNKB,SCN1A	799	92	102	23	0.000636055
CLCN3,MAL2,LRRN2	537	52	364	63	0.000636347
DNAJC16,CLCNKB,ANKRD46	664	71	237	44	0.000636627
CLCN3,ANKRD46,LRRN2	538	58	363	57	0.000638906
PLXNC1,SCN7A,IL2RB	827	113	74	2	0.00063935
CLCN3,SLC30A8,TRHR	651	65	250	50	0.000640022
TMEM81,ERVMER34-1,TRHR	585	59	316	56	0.000640722
TMEM131,CLCNKB,SCN1A	818	97	83	18	0.000640806
SLC30A8,GRM8,ABCA13	649	64	252	51	0.000641009
IGSF9B,GRIK2,CLCNKB	817	94	84	21	0.000641277
CDON,CLCNKB,SCN1A	818	92	83	23	0.000641339
SLC30A8,TENM1,PCDHGB3	661	67	240	48	0.00064134
OR8D4,TENM1,NRXN3	817	93	84	22	0.000641714
TMEM67,NIPAL2,NRXN3	666	69	235	46	0.000641957
TRHR,ADIPOR1,ABCA13	549	53	352	62	0.000642326
SLC30A8,ADIPOR1,NRXN3	548	53	353	62	0.000643242
CNGA2,MAL2,ABCA13	640	59	261	56	0.00064336
CLCN3,ADIPOR1,TAAR2	646	71	255	44	0.000644362
TMEM81,TENM1,TRPV2	682	75	219	40	0.000644739
TMEM67,TRHR,TLR5	556	51	345	64	0.000644943
OR8D4,DNAJC16,KCNH7	794	90	107	25	0.000646269
IGSF9B,STAB1,SLC30A8	673	70	228	45	0.000647134
FZD6,TENM1,LRRN2	574	61	327	54	0.000647482
SLC30A8,CLCNKB,LRRN2	561	58	340	57	0.000649533
DNAJC16,ERVMER34-1,KCNH7	822	97	79	18	0.000649923
SLC30A8,OR8D4,TLR5	563	54	338	61	0.000650745
TMEM67,TMEM81,IL2RB	563	58	338	57	0.000651254
IGSF9B,KCNH7,TRPV2	825	97	76	18	0.000651762
DNAJC16,FZD6,TENM1	675	72	226	43	0.000652031
STAB1,TENM1,NRXN3	825	95	76	20	0.000652557
TRHR,TMEM68,LRRN2	515	49	386	66	0.000652615
STAB1,MAL2,TMEM81	544	52	357	63	0.000652851
OR8D4,TMEM131,ERVMER34-1	822	98	79	17	0.000653161
CLCNKB,ERVMER34-1,KCNH7	838	102	63	13	0.000654084
SLC30A8,MAL2,ADIPOR1	521	48	380	67	0.000655
TMEM67,CNGA2,KCNV1	647	65	254	50	0.000655329
GRM8,GRIK2,NRXN3	813	92	88	23	0.00065544
SLC30A8,ERVMER34-1,ADIPOR1	554	54	347	61	0.000657114
TMEM67,FZD6,PCDHGB3	640	69	261	46	0.000657656
CLCN3,ABCA13,PCDHGB3	774	86	127	29	0.00065795
MAL2,TMEM81,LRRN2	537	52	364	63	0.000658274
CLCN3,CLCNKB,OR4Q3	799	94	102	21	0.000658657
STAB1,SLC30A8,TENM1	672	69	229	46	0.000659371
MAL2,FZD6,ADIPOR1	518	48	383	67	0.000660462
IGSF9B,TRHR,TMEM68	618	60	283	55	0.000660951
CDON,GRIK2,ERVMER34-1	823	94	78	21	0.000661783
CLCN3,ANKRD46,TMEM68	611	64	290	51	0.000662667
TMEM67,ANKRD46,PCDHGB3	632	68	269	47	0.00066332
CNGA2,GRIK2,TRHR	696	72	205	43	0.000665123
WNT5A,ERVMER34-1,TECRL	836	101	65	14	0.000665159
CLCN3,CLCNKB,FZD6	672	73	229	42	0.000666355
WNT5A,TMEM81,TMEM131	674	78	227	37	0.000666461
IGSF9B,OR8D4,TENM1	827	95	74	20	0.000668304
MAL2,ADIPOR1,OR4Q3	530	49	371	66	0.000669146
STAB1,NIPAL2,TAAR2	689	73	212	42	0.000669463
CNGA2,DNAJC16,SLC45A4	672	68	229	47	0.000669701
TMEM67,CLCNKB,ANKRD46	647	70	254	45	0.000669903
CLCN3,OR8D4,MAL2	634	60	267	55	0.000672043
CLCN3,WNT5A,GRM8	799	94	102	21	0.000672777
IGSF9B,TENM1,SCN1A	826	94	75	21	0.000673732
CNGA2,DNAJC16,CDON	801	87	100	28	0.000674044
PLXNC1,SCN7A,ADAM19	818	111	83	4	0.000675527
WNT5A,SCN1A,TAAR2	819	96	82	19	0.000677755
TMEM67,TMEM68,LRRN2	520	54	381	61	0.000677978
TMEM67,WNT5A,SCN7A	687	72	214	43	0.00067845
TMEM67,CNGA2,SCN7A	685	72	216	43	0.000678533
SLC30A8,GRM8,ADIPOR1	544	53	357	62	0.000679319
GRM8,CLCNKB,TAAR2	813	95	88	20	0.000679648
MAL2,ADIPOR1,KCNV1	514	46	387	69	0.000679827
STAB1,DNAJC16,TENM1	808	91	93	24	0.000680606
TMEM81,GRIK2,LRRN2	669	74	232	41	0.000681926
CLCN3,ERVMER34-1,ADIPOR1	664	74	237	41	0.000682482
STAB1,OR8D4,TAAR2	808	92	93	23	0.000683043
CLCN3,SLC30A8,TRPV2	655	66	246	49	0.000684783
TMEM131,CDON,TECRL	798	93	103	22	0.000684933
DNAJC16,ERVMER34-1,ANKRD46	669	72	232	43	0.000686328
TMEM81,TENM1,KCNV1	571	56	330	59	0.000686329
TMEM67,TMEM81,TMEM68	515	52	386	63	0.000686338
TMEM67,TRHR,KCNT2	651	66	250	49	0.000686353
CNGA2,OR8D4,CDON	819	91	82	24	0.000686608
SLC30A8,OR8D4,CLCNKB	663	67	238	48	0.000687485
CLCN3,MAL2,TMEM131	631	62	270	53	0.000688004
WNT5A,TMEM81,SLC45A4	566	58	335	57	0.000689187
CLCN3,STAB1,SCN1A	799	91	102	24	0.000690947
WNT5A,SLC30A8,TENM1	678	69	223	46	0.000691313
DNAJC16,ANKRD46,PCDHGB3	647	69	254	46	0.000691529
CNGA2,ERVMER34-1,ANKRD46	677	73	224	42	0.0006924
CNGA2,GRIK2,TECRL	816	93	85	22	0.000692938
SLC30A8,TMEM81,TLR5	535	50	366	65	0.000692938
STAB1,TRHR,ADIPOR1	562	54	339	61	0.000692985
CLCN3,TRHR,ADIPOR1	556	54	345	61	0.000693002
SLC30A8,CLCNKB,OR4Q3	670	69	231	46	0.000695096
TMEM67,PLXNC1,TENM1	668	69	233	46	0.00069528
CNGA2,SLC30A8,MAL2	642	61	259	54	0.000695332
CNGA2,SLC30A8,TMEM68	598	56	303	59	0.000697232
DNAJC16,TMEM249,TAAR2	665	66	236	49	0.000697387
WNT5A,CLCNKB,SCN1A	831	98	70	17	0.000697697
STAB1,CDON,ABCA13	790	86	111	29	0.000698415
SLC30A8,OR8D4,TMEM131	652	67	249	48	0.000701374
STAB1,GRM8,ERVMER34-1	836	98	65	17	0.000702331
CNGA2,TMEM131,TRHR	685	72	216	43	0.000702497
CLCN3,STAB1,GRM8	796	92	105	23	0.000703298
TMEM67,FZD6,SCN1A	651	69	250	46	0.000703732
TMEM67,ERVMER34-1,ANKRD46	652	71	249	44	0.000705388
TMEM67,ERVMER34-1,FREM2	694	74	207	41	0.00070569
TMEM67,TMEM81,FZD6	536	56	365	59	0.000706612
IGSF9B,SLC30A8,DNAJC16	665	68	236	47	0.000706907
TMEM81,TMEM131,SCN1A	675	77	226	38	0.000707117
MAL2,CLCNKB,TENM1	657	64	244	51	0.00070913
TMEM67,FZD6,NIPAL2	648	68	253	47	0.000709201
CLCN3,SLC30A8,MAL2	630	61	271	54	0.000709739
STAB1,TMEM131,TENM1	817	95	84	20	0.000710103
CDON,GRIK2,NRXN3	808	91	93	24	0.000710234
STAB1,TRHR,TMEM68	620	59	281	56	0.000710238
STAB1,OR8D4,TENM1	814	91	87	24	0.000711755
IGSF9B,KCNH7,TENM1	823	96	78	19	0.000711889
WNT5A,KCNH7,SCN1A	829	98	72	17	0.000714325
CNGA2,SCN1A,NRXN3	832	95	69	20	0.000715045
TMEM67,FZD6,LRRN2	545	59	356	56	0.000715664
WNT5A,CNGA2,SLC45A4	680	70	221	45	0.000716204
CLCN3,DNAJC16,TENM1	794	91	107	24	0.000716857
CLCN3,GRIK2,TMEM68	679	71	222	44	0.000717877
MAL2,ADIPOR1,LRRN2	519	49	382	66	0.000720092
IGSF9B,SLC30A8,TENM1	675	69	226	46	0.000720349
SLC30A8,ADIPOR1,TRPV2	545	52	356	63	0.000720872
TMEM81,TRHR,TLR5	557	51	344	64	0.000721553
TMEM67,KCNH7,IL2RB	683	74	218	41	0.000721878
OR8D4,DNAJC16,ERVMER34-1	815	93	86	22	0.000722522
SLC30A8,TMEM131,OR4Q3	660	69	241	46	0.000723209
TMEM67,MAL2,TENM1	621	60	280	55	0.000724073
CNGA2,DNAJC16,GRM8	809	90	92	25	0.000725298
CNGA2,DNAJC16,FZD6	676	72	225	43	0.000725363
OR8D4,TMEM81,TMEM131	664	76	237	39	0.000726654
WNT5A,STAB1,FZD6	686	74	215	41	0.000727167
CLCN3,ERVMER34-1,TRHR	692	73	209	42	0.000727508
CLCN3,STAB1,TRHR	680	70	221	45	0.000727828
CLCNKB,ANKRD46,LRRN2	553	60	348	55	0.000728173
TMEM67,ANKRD46,TRPV2	643	69	258	46	0.000728638
SLC30A8,TMEM81,OR4Q3	560	56	341	59	0.000728997
WNT5A,CNGA2,MAL2	658	63	243	52	0.000731557
IGSF9B,STAB1,TAAR2	819	95	82	20	0.000732617
TMEM131,CLCNKB,TAAR2	811	98	90	17	0.000735181
TMEM67,SLC30A8,OR4Q3	632	64	269	51	0.000735527
DNAJC16,ANKRD46,LRRN2	542	58	359	57	0.000735648
TMEM67,SCN1A,FREM2	682	71	219	44	0.000735668
CLCN3,CDON,TAAR2	782	89	119	26	0.000735726
STAB1,GRIK2,ERVMER34-1	832	96	69	19	0.000736321
STAB1,SLC30A8,NRXN3	669	70	232	45	0.000736457
SLC30A8,TMEM131,PCDHGB3	648	68	253	47	0.000740903
CLCN3,TRHR,LRRN2	571	59	330	56	0.000742107
SLC30A8,TMEM81,SCN1A	560	56	341	59	0.000742589
CNGA2,SLC30A8,KCNV1	653	64	248	51	0.000742854
PLXNC1,SEMA3D,TRPM1	800	108	101	7	0.000745255
TMEM67,NRXN3,FREM2	681	72	220	43	0.000746278
CLCN3,KCNH7,ADIPOR1	656	73	245	42	0.000749643
CLCN3,SLC30A8,NIPAL2	640	65	261	50	0.000750807
TMEM67,TMEM131,FZD6	647	71	254	44	0.000752759
TMEM67,ADIPOR1,KCNV1	521	49	380	66	0.000753743
TMEM81,TMEM131,KCNH7	673	78	228	37	0.000754405
CNGA2,TRPV2,PCDHGB3	818	94	83	21	0.000755414
SLC30A8,CLCNKB,TRPV2	670	68	231	47	0.000755953
TMEM67,CLCNKB,NIPAL2	671	70	230	45	0.000755999
TMEM67,CLCN3,SLC45A4	612	61	289	54	0.000757324
CNGA2,ANKRD46,TRHR	650	66	251	49	0.000757637
WNT5A,IGSF9B,TMEM68	694	74	207	41	0.000758683
STAB1,OR4Q3,NRXN3	825	96	76	19	0.000759791
IGSF9B,TMEM81,TENM1	686	76	215	39	0.000760203
TMEM81,GRM8,KCNV1	562	56	339	59	0.000760281
TMEM131,ANKRD46,ADIPOR1	525	54	376	61	0.000761406
CLCN3,GRM8,TECRL	789	92	112	23	0.000762959
CNGA2,CLCNKB,ANKRD46	671	72	230	43	0.00076346
OR8D4,DNAJC16,FZD6	665	70	236	45	0.000763531
STAB1,OR8D4,MAL2	645	62	256	53	0.000765296
TMEM67,ANKRD46,LRRN2	532	58	369	57	0.000765306
CLCN3,IGSF9B,FZD6	667	72	234	43	0.000766411
WNT5A,TMEM131,SCN1A	823	98	78	17	0.000767056
CNGA2,SLC30A8,SLC45A4	631	62	270	53	0.000767349
TMEM131,TRHR,ADIPOR1	554	55	347	60	0.000768141
CLCN3,FZD6,TENM1	675	72	226	43	0.000768489
SLC30A8,DNAJC16,TMEM68	596	57	305	58	0.000768573
TMEM81,KCNV1,TLR5	546	51	355	64	0.000768953
WNT5A,OR8D4,TENM1	816	93	85	22	0.000768953
CNGA2,GRM8,ANKRD46	662	71	239	44	0.000769866
STAB1,ERVMER34-1,ABCA13	817	92	84	23	0.000770056
MAL2,TMEM81,ABCA13	531	50	370	65	0.000770247
TMEM67,TMEM81,KCNV1	531	52	370	63	0.000771989
STAB1,DNAJC16,TECRL	802	92	99	23	0.000772283
WNT5A,TMEM131,GRIK2	811	96	90	19	0.000772438
STAB1,CLCNKB,OR4Q3	826	97	75	18	0.000773207
CLCN3,STAB1,TMEM68	685	72	216	43	0.000774741
WNT5A,DNAJC16,TMEM131	807	95	94	20	0.000775195
CLCN3,IGSF9B,ABCA13	781	87	120	28	0.000775919
TMEM67,GRM8,KCNT2	677	72	224	43	0.00077616
TMEM67,DNAJC16,FREM2	668	69	233	46	0.000777939
TMEM67,NIPAL2,LRRN2	561	58	340	57	0.000779781
STAB1,MAL2,TAAR2	647	63	254	52	0.00078229
SLC30A8,TENM1,NRXN3	674	69	227	46	0.000782955
STAB1,MAL2,ERVMER34-1	665	66	236	49	0.000783725
MAL2,TMEM81,GRM8	542	52	359	63	0.00078399
CNGA2,SLC30A8,CDON	663	66	238	49	0.000784342
CLCN3,MAL2,TMEM68	597	57	304	58	0.000784871
CLCN3,CLCNKB,PCDHGB3	789	92	112	23	0.00078557
SLC30A8,TLR5,TAAR2	570	55	331	60	0.000786017
CNGA2,TRHR,LRRN2	586	60	315	55	0.000786838
CNGA2,GRM8,TECRL	815	94	86	21	0.000787545
MAL2,ADIPOR1,MTDH	477	43	424	72	0.000790084
CLCN3,FZD6,ADIPOR1	548	56	353	59	0.000791926
IGSF9B,GRM8,TENM1	823	94	78	21	0.00079276
TMEM81,GRM8,FZD6	562	59	339	56	0.000793194
DNAJC16,TMEM81,FZD6	558	58	343	57	0.000794051
STAB1,GRM8,GRIK2	813	92	88	23	0.000794557
CNGA2,CLCNKB,TENM1	825	94	76	21	0.000794638
STAB1,GRM8,TAAR2	810	94	91	21	0.000794757
WNT5A,TMEM81,TRHR	576	58	325	57	0.000795027
CNGA2,CDON,TRHR	687	70	214	45	0.000795808
CNGA2,MAL2,CLCNKB	657	63	244	52	0.000798321
TMEM67,CLCN3,KCNV1	633	64	268	51	0.00079965
CLCN3,KCNH7,TMEM68	676	73	225	42	0.000799777
CNGA2,OR8D4,CLCNKB	819	93	82	22	0.000802311
CNGA2,OR8D4,GRM8	815	91	86	24	0.000802726
TMEM67,GRM8,TLR5	575	57	326	58	0.000802915
TMEM131,ADIPOR1,KCNV1	542	53	359	62	0.000802963
WNT5A,TMEM131,TAAR2	811	98	90	17	0.00080305
SLC30A8,CLCNKB,TMEM68	603	58	298	57	0.000803588
SLC30A8,DNAJC16,TLR5	562	53	339	62	0.000803844
TMEM81,GRM8,KCNH7	678	77	223	38	0.000804566
CNGA2,MAL2,SCN1A	656	62	245	53	0.000805217
WNT5A,OR8D4,TAAR2	809	94	92	21	0.000805845
TMEM67,TENM1,TMEM249	615	58	286	57	0.000806424
CLCN3,SLC30A8,GRIK2	657	68	244	47	0.000807688
TMEM67,WNT5A,NIPAL2	672	70	229	45	0.000807724
STAB1,TMEM131,TRPV2	821	97	80	18	0.000808209
CNGA2,TMEM81,LRRN2	675	76	226	39	0.000808397
PLXNC1,SCN7A,MUSK	810	111	91	4	0.000809075
STAB1,OR8D4,OR4Q3	817	93	84	22	0.000810257
MAL2,ADIPOR1,IL2RB	532	49	369	66	0.000812159
SLC30A8,ADIPOR1,TECRL	543	53	358	62	0.000812637
IGSF9B,KCNH7,SCN1A	826	96	75	19	0.000812949
MAL2,GRM8,LRRN2	546	54	355	61	0.000813592
TMEM67,IGSF9B,KCNT2	680	72	221	43	0.000813606
CNGA2,ERVMER34-1,NRXN3	845	99	56	16	0.00081398
IGSF9B,SCN1A,TRPV2	829	95	72	20	0.000814827
IGSF9B,TMEM81,LRRN2	671	77	230	38	0.000815675
GRM8,CLCNKB,ERVMER34-1	836	99	65	16	0.000816983
TMEM67,TRHR,FREM2	648	65	253	50	0.000819897
IGSF9B,OR4Q3,TECRL	819	96	82	19	0.000820841
CNGA2,KCNH7,TECRL	820	97	81	18	0.000821364
WNT5A,SLC30A8,CLCNKB	675	70	226	45	0.000821532
CLCN3,OR8D4,NIPAL2	676	70	225	45	0.000821601
FZD6,TMEM68,LRRN2	516	53	385	62	0.00082207
CLCN3,SLC30A8,ABCA13	641	63	260	52	0.000822425
IGSF9B,CDON,ERVMER34-1	843	99	58	16	0.000824458
CLCN3,TMEM131,NIPAL2	675	73	226	42	0.000825403
IGSF9B,OR8D4,GRM8	824	95	77	20	0.000827011
DNAJC16,GRIK2,TAAR2	800	89	101	26	0.000827893
SLC30A8,GRM8,TLR5	563	54	338	61	0.000828119
OR8D4,ERVMER34-1,KCNH7	829	98	72	17	0.00082841
CLCN3,CDON,SCN1A	788	88	113	27	0.00082897
CNGA2,TMEM81,FZD6	568	59	333	56	0.000829892
TMEM67,CLCNKB,FREM2	686	73	215	42	0.00083036
STAB1,OR8D4,ABCA13	792	86	109	29	0.000832019
IGSF9B,TENM1,TECRL	815	94	86	21	0.00083315
DNAJC16,CDON,GRIK2	791	87	110	28	0.00083404
TMEM131,CLCNKB,ANKRD46	662	73	239	42	0.000834159
CLCN3,CNGA2,LRRN2	674	76	227	39	0.000834238
SLC30A8,CLCNKB,KCNH7	667	70	234	45	0.000835149
OR8D4,TMEM131,TENM1	805	93	96	22	0.000835172
IGSF9B,MAL2,TENM1	656	64	245	51	0.000836041
MAL2,TRHR,ADIPOR1	524	46	377	69	0.000837072
OR8D4,TMEM81,KCNV1	561	56	340	59	0.000837124
TMEM81,NIPAL2,TENM1	581	59	320	56	0.00083813
CLCN3,CLCNKB,TMEM68	684	73	217	42	0.000841104
SLC30A8,CLCNKB,TAAR2	670	69	231	46	0.000841958
CLCN3,SLC30A8,CDON	649	66	252	49	0.000842001
SLC30A8,TMEM81,ERVMER34-1	566	58	335	57	0.000842443
GRM8,TMEM131,KCNH7	809	97	92	18	0.00084551
GRM8,TMEM131,NRXN3	810	96	91	19	0.000846447
SLC30A8,DNAJC16,ABCA13	647	63	254	52	0.000849628
TMEM67,TMEM81,FREM2	562	58	339	57	0.000852159
CNGA2,MAL2,NIPAL2	645	62	256	53	0.000852508
TMEM67,CDON,ANKRD46	631	66	270	49	0.000852594
DNAJC16,TMEM131,CDON	792	90	109	25	0.000854064
IGSF9B,STAB1,TRHR	692	71	209	44	0.000854895
MAL2,TENM1,TMEM249	615	57	286	58	0.000856511
STAB1,SLC30A8,TLR5	565	55	336	60	0.000858317
CNGA2,CDON,PCDHGB3	807	90	94	25	0.000858479
STAB1,GRIK2,NRXN3	816	93	85	22	0.000858848
CLCN3,GRIK2,ADIPOR1	648	70	253	45	0.00086147
IGSF9B,CDON,TECRL	817	95	84	20	0.00086318
CLCN3,CNGA2,TMEM81	671	74	230	41	0.000863372
CNGA2,DNAJC16,SCN1A	818	92	83	23	0.000863542
TMEM67,FZD6,TAAR2	649	70	252	45	0.000863641
STAB1,TRHR,LRRN2	578	59	323	56	0.000866208
STAB1,OR4Q3,TAAR2	815	95	86	20	0.000867896
IGSF9B,SLC30A8,ADIPOR1	544	53	357	62	0.000869587
CLCN3,ERVMER34-1,ANKRD46	660	72	241	43	0.000870245
SLC30A8,DNAJC16,ERVMER34-1	678	70	223	45	0.000870762
DNAJC16,GRIK2,ERVMER34-1	818	93	83	22	0.000870881
TMEM67,TMEM81,SLC45A4	523	52	378	63	0.00087177
TMEM81,TRHR,TRPV2	578	58	323	57	0.000873931
TMEM67,SLC30A8,TLR5	535	50	366	65	0.00087406
CLCN3,STAB1,NIPAL2	682	73	219	42	0.000875332
CNGA2,TMEM81,KCNV1	568	56	333	59	0.000875416
WNT5A,STAB1,SLC30A8	677	71	224	44	0.000880077
TMEM67,SLC30A8,NIPAL2	629	63	272	52	0.000880656
CLCN3,ANKRD46,PCDHGB3	642	69	259	46	0.000882213
CLCN3,SLC30A8,TECRL	655	68	246	47	0.00088234
TMEM67,STAB1,KCNT2	680	71	221	44	0.000883494
CNGA2,OR8D4,TRHR	689	69	212	46	0.000885946
DNAJC16,TMEM131,TAAR2	796	93	105	22	0.000892091
STAB1,PCDHGB3,TAAR2	803	93	98	22	0.000892231
MAL2,ADIPOR1,TMEM249	500	45	401	70	0.000893113
MAL2,TMEM131,TENM1	645	64	256	51	0.000893157
IGSF9B,SLC30A8,OR8D4	672	69	229	46	0.000895271
SLC30A8,CLCNKB,TECRL	668	70	233	45	0.000897074
CNGA2,TRHR,ADIPOR1	568	55	333	60	0.000897343
GRIK2,CLCNKB,TAAR2	817	94	84	21	0.0008974
STAB1,TMEM131,TRHR	684	72	217	43	0.000897888
CLCN3,TENM1,SCN1A	808	93	93	22	0.000900317
CNGA2,ANKRD46,LRRN2	553	60	348	55	0.000904615
MAL2,DNAJC16,TMEM81	542	52	359	63	0.000904876
STAB1,CLCNKB,NRXN3	824	97	77	18	0.000906755
TMEM67,TMEM81,NIPAL2	551	56	350	59	0.000907213
OR8D4,DNAJC16,TECRL	793	90	108	25	0.000907548
TMEM67,ADIPOR1,KCNT2	552	55	349	60	0.000908123
WNT5A,GRIK2,TECRL	813	94	88	21	0.00091176
CLCN3,TMEM131,LRRN2	664	77	237	38	0.00091181
IGSF9B,GRIK2,OR4Q3	821	94	80	21	0.00091253
TMEM67,GRM8,SCN7A	679	72	222	43	0.000912802
CNGA2,TRHR,NIPAL2	673	67	228	48	0.000915284
STAB1,SLC30A8,ERVMER34-1	683	72	218	43	0.000915803
CNGA2,DNAJC16,TMEM68	680	70	221	45	0.000916692
OR8D4,KCNV1,TLR5	575	56	326	59	0.000916978
TMEM81,GRM8,SCN1A	682	77	219	38	0.000918382
WNT5A,DNAJC16,ANKRD46	665	71	236	44	0.000918778
TMEM67,TMEM131,ANKRD46	638	70	263	45	0.000920798
STAB1,KCNH7,TAAR2	812	96	89	19	0.000922015
OR8D4,DNAJC16,OR4Q3	799	90	102	25	0.000922867
CLCN3,PCDHGB3,NRXN3	792	92	109	23	0.000924174
DNAJC16,ANKRD46,SCN1A	661	70	240	45	0.000924746
TENM1,ADIPOR1,KCNV1	553	53	348	62	0.000924842
SLC30A8,PCDHGB3,TLR5	555	53	346	62	0.000926513
STAB1,TMEM81,FZD6	563	58	338	57	0.000927594
TMEM67,NIPAL2,ABCA13	654	66	247	49	0.000928793
IGSF9B,TMEM81,TRHR	574	58	327	57	0.000930183
WNT5A,OR8D4,NRXN3	818	95	83	20	0.000932089
WNT5A,GRIK2,NRXN3	820	95	81	20	0.000935795
CNGA2,STAB1,TMEM81	683	75	218	40	0.000936807
PLXNC1,SCN7A,FREM2	822	113	79	2	0.000939237
IGSF9B,SLC30A8,GRM8	670	70	231	45	0.000941198
MAL2,NIPAL2,ADIPOR1	524	49	377	66	0.000941213
IGSF9B,SLC30A8,TMEM131	660	70	241	45	0.000941312
STAB1,CLCNKB,TRHR	694	72	207	43	0.000941677
CNGA2,ERVMER34-1,NIPAL2	712	75	189	40	0.000942157
CNGA2,MAL2,TMEM68	602	56	299	59	0.000942725
CLCN3,CLCNKB,TRPV2	796	93	105	22	0.000944132
STAB1,CLCNKB,FZD6	684	74	217	41	0.000944845
TMEM67,SLC30A8,IL2RB	633	63	268	52	0.000944996
CNGA2,TMEM81,SCN1A	691	77	210	38	0.000946852
CLCN3,TMEM68,LRRN2	569	59	332	56	0.000947774
OR8D4,TMEM81,SLC45A4	562	57	339	58	0.00094802
STAB1,SLC30A8,TMEM81	556	57	345	58	0.00094855
WNT5A,MAL2,ADIPOR1	533	50	368	65	0.000950006
WNT5A,OR4Q3,TAAR2	816	97	85	18	0.000950046
SLC30A8,OR4Q3,TLR5	571	55	330	60	0.00095023
TMEM67,KCNH7,TMEM68	619	66	282	49	0.000951595
TMEM67,IGSF9B,SCN7A	682	72	219	43	0.000954476
TMEM67,WNT5A,KCNV1	646	65	255	50	0.000956352
SLC30A8,TRHR,ADIPOR1	543	51	358	64	0.000958904
TMEM81,ANKRD46,TENM1	545	56	356	59	0.00095892
TMEM81,TENM1,OR4Q3	688	76	213	39	0.000959092
CNGA2,TENM1,LRRN2	697	78	204	37	0.000959371
CLCN3,TENM1,TMEM68	688	73	213	42	0.000960263
WNT5A,IGSF9B,CDON	830	97	71	18	0.000960609
CLCN3,MAL2,ERVMER34-1	651	64	250	51	0.000962028
MAL2,DNAJC16,TMEM249	611	57	290	58	0.000964318
CNGA2,OR8D4,TMEM68	686	71	215	44	0.000965658
STAB1,FZD6,ADIPOR1	552	56	349	59	0.000966078
STAB1,SLC30A8,OR8D4	664	68	237	47	0.000966121
IGSF9B,OR8D4,OR4Q3	828	97	73	18	0.000966152
CNGA2,TRHR,TRPV2	700	72	201	43	0.000966333
CLCN3,SLC30A8,TMEM249	616	59	285	56	0.000966494
MAL2,DNAJC16,TMEM131	642	64	259	51	0.0009672
TMEM67,SCN7A,SCN1A	685	72	216	43	0.000967975
CNGA2,TMEM131,ANKRD46	659	72	242	43	0.00097584
TMEM67,TMEM131,FREM2	675	73	226	42	0.000976628
CLCN3,STAB1,LRRN2	672	76	229	39	0.00097705
TMEM67,SEMA3D,ADIPOR1	555	55	346	60	0.000977968
WNT5A,SLC30A8,TMEM81	559	57	342	58	0.000977994
CLCN3,SLC30A8,TAAR2	653	67	248	48	0.000979531
CLCN3,STAB1,TRPV2	799	92	102	23	0.000979736
OR8D4,CLCNKB,SCN1A	817	93	84	22	0.000979884
CLCN3,IGSF9B,LRRN2	671	77	230	38	0.000980533
GRM8,CDON,GRIK2	805	90	96	25	0.000980927
IGSF9B,TMEM81,SCN1A	685	77	216	38	0.000983354
CLCN3,CLCNKB,LRRN2	670	77	231	38	0.000983758
TMEM67,SLC30A8,FZD6	626	64	275	51	0.000983834
WNT5A,TMEM81,TENM1	684	77	217	38	0.000984992
CLCN3,OR8D4,ABCA13	774	85	127	30	0.000987147
TMEM67,ANKRD46,SCN1A	641	68	260	47	0.000987325
WNT5A,TMEM131,NRXN3	820	99	81	16	0.000987452
SLC30A8,MAL2,TMEM81	533	51	368	64	0.000991601
CLCN3,GRM8,CLCNKB	795	93	106	22	0.000991769
TMEM81,SLC45A4,TAAR2	567	58	334	57	0.000995095
TMEM81,FZD6,SCN1A	568	59	333	56	0.000995132
STAB1,TMEM131,FZD6	674	74	227	41	0.000995631
CNGA2,MAL2,TRHR	645	59	256	56	0.000996788
TMEM67,STAB1,SCN7A	683	71	218	44	0.000997113
CLCN3,LRRN2,TECRL	668	77	233	38	0.000997444
CNGA2,STAB1,FZD6	682	73	219	42	0.000997526
STAB1,CLCNKB,TRPV2	828	97	73	18	0.00100142
TMEM81,ERVMER34-1,SLC45A4	578	60	323	55	0.00100159
DNAJC16,GRM8,GRIK2	800	89	101	26	0.00100318
TMEM67,SEMA3D,TENM1	681	70	220	45	0.00100336
CDON,GRIK2,SCN1A	810	90	91	25	0.00100438
SLC30A8,TENM1,SCN1A	674	68	227	47	0.00100595
CLCN3,ADIPOR1,TECRL	649	72	252	43	0.00100889
OR8D4,MAL2,TENM1	648	62	253	53	0.0010092
CLCNKB,ANKRD46,TENM1	667	71	234	44	0.00100996
TMEM67,GRIK2,TMEM68	623	65	278	50	0.00101311
CLCN3,MAL2,TMEM249	603	56	298	59	0.00101424
SLC30A8,TMEM131,NRXN3	659	70	242	45	0.00101576
CNGA2,GRM8,NIPAL2	693	73	208	42	0.00101678
CNGA2,MAL2,KCNH7	650	63	251	52	0.00101742
STAB1,CLCNKB,TENM1	822	95	79	20	0.00101897
IGSF9B,ERVMER34-1,TECRL	836	100	65	15	0.00101906
SLC30A8,CLCNKB,NRXN3	669	70	232	45	0.00102077
TMEM81,NIPAL2,ABCA13	563	58	338	57	0.00102525
STAB1,FZD6,LRRN2	567	61	334	54	0.0010277
TMEM67,MAL2,LRRN2	519	51	382	64	0.00102805
IGSF9B,CLCNKB,ANKRD46	666	72	235	43	0.00102808
MAL2,DNAJC16,TMEM68	602	57	299	58	0.00102918
TMEM81,GRIK2,TRPV2	678	74	223	41	0.00102924
GRIK2,TRPV2,TAAR2	817	93	84	22	0.00102982
TMEM131,FZD6,ADIPOR1	545	57	356	58	0.00103056
CLCNKB,FZD6,TMEM68	625	65	276	50	0.00103171
CLCN3,SCN1A,NRXN3	800	92	101	23	0.00103228
STAB1,TMEM81,GRM8	677	76	224	39	0.00103322
TMEM81,TMEM131,TECRL	670	77	231	38	0.00103422
WNT5A,GRM8,SCN1A	827	96	74	19	0.00103468
SLC30A8,OR8D4,TENM1	667	67	234	48	0.0010347
STAB1,OR8D4,SCN1A	818	92	83	23	0.00103605
WNT5A,CLCNKB,TENM1	825	97	76	18	0.00103657
STAB1,DNAJC16,NRXN3	808	92	93	23	0.00103878
TMEM67,WNT5A,PLXNC1	674	71	227	44	0.00103897
MAL2,ERVMER34-1,LRRN2	558	56	343	59	0.00103902
CLCN3,DNAJC16,TMEM68	672	71	229	44	0.0010393
CLCN3,ADIPOR1,KCNV1	545	53	356	62	0.00103939
TMEM67,CNGA2,PLXNC1	672	71	229	44	0.0010395
IGSF9B,STAB1,FZD6	681	73	220	42	0.00103954
CNGA2,MAL2,TMEM131	642	63	259	52	0.00104093
IGSF9B,TRPV2,PCDHGB3	815	95	86	20	0.00104472
CLCN3,TRPV2,NRXN3	798	93	103	22	0.0010453
CNGA2,CLCNKB,SCN1A	833	96	68	19	0.00104588
MAL2,TMEM81,ERVMER34-1	555	54	346	61	0.00104658
SLC30A8,NRXN3,TLR5	570	55	331	60	0.00104713
WNT5A,SLC30A8,OR8D4	670	68	231	47	0.0010473
PLXNC1,SCN7A,SEMA3D	823	113	78	2	0.00104773
CNGA2,TMEM68,ABCA13	677	69	224	46	0.00104829
CNGA2,TMEM81,ABCA13	667	73	234	42	0.00104864
IGSF9B,CDON,SCN1A	826	94	75	21	0.00104867
STAB1,MAL2,GRM8	651	65	250	50	0.00104901
TMEM67,OR8D4,MUSK	667	69	234	46	0.00105051
PLXNC1,ADAM19,KCNT2	814	110	87	5	0.00105068
STAB1,CDON,OR4Q3	815	92	86	23	0.00105083
STAB1,GRM8,CLCNKB	821	96	80	19	0.00105305
STAB1,TRHR,TAAR2	689	71	212	44	0.00105311
STAB1,GRM8,NRXN3	819	95	82	20	0.0010536
IGSF9B,TRPV2,NRXN3	831	97	70	18	0.00105444
CNGA2,GRM8,ABCA13	797	87	104	28	0.0010545
STAB1,CDON,KCNH7	811	93	90	22	0.00105453
CNGA2,GRM8,TRHR	693	72	208	43	0.0010546
SLC30A8,GRM8,NRXN3	668	70	233	45	0.00105521
TMEM67,SCN7A,ADIPOR1	553	55	348	60	0.00105553
CNGA2,KCNH7,SCN1A	830	96	71	19	0.00105659
CLCN3,ANKRD46,TAAR2	642	69	259	46	0.00105812
TMEM81,ERVMER34-1,FZD6	576	61	325	54	0.00105833
CLCN3,OR8D4,MTDH	604	59	297	56	0.00106003
TMEM67,GRIK2,KCNT2	683	73	218	42	0.00106045
MAL2,TENM1,TAAR2	651	63	250	52	0.00106309
CNGA2,OR8D4,ABCA13	796	86	105	29	0.0010638
TMEM67,ABCA13,NRXN3	668	69	233	46	0.00106456
TMEM67,GRIK2,FREM2	681	72	220	43	0.00106481
CNGA2,OR4Q3,TRPV2	830	96	71	19	0.00106491
OR8D4,TMEM131,OR4Q3	806	95	95	20	0.0010657
STAB1,MAL2,TMEM68	606	58	295	57	0.00106833
IGSF9B,STAB1,NIPAL2	697	74	204	41	0.00106886
TMEM81,GRIK2,TENM1	685	74	216	41	0.00106887
CNGA2,GRM8,TENM1	822	93	79	22	0.00106893
CDON,PCDHGB3,TECRL	798	92	103	23	0.00106927
TMEM67,GRIK2,FZD6	649	70	252	45	0.00106972
DNAJC16,OR4Q3,TAAR2	801	92	100	23	0.00106997
CLCN3,CLCNKB,TRHR	684	72	217	43	0.00107017
CLCN3,FZD6,NRXN3	670	73	231	42	0.00107075
CNGA2,TMEM81,CDON	673	73	228	42	0.00107328
IGSF9B,SLC30A8,TMEM81	557	57	344	58	0.00107451
STAB1,CLCNKB,SCN1A	827	96	74	19	0.00107458
IGSF9B,OR4Q3,NRXN3	828	97	73	18	0.00107644
TMEM67,LRRN2,FREM2	572	61	329	54	0.00107749
SLC30A8,OR8D4,ADIPOR1	542	52	359	63	0.00107768
TMEM67,CNGA2,SEMA3D	685	72	216	43	0.00107903
TMEM67,WNT5A,SEMA3D	688	72	213	43	0.00107948
IGSF9B,GRM8,CDON	823	94	78	21	0.0010796
TENM1,ADIPOR1,TECRL	660	72	241	43	0.00107979
TMEM67,ADAM19,TENM1	679	68	222	47	0.00108037
SLC30A8,ERVMER34-1,TENM1	686	71	215	44	0.00108054
CNGA2,TENM1,ADIPOR1	670	72	231	43	0.00108123
CNGA2,GRM8,SCN1A	827	94	74	21	0.00108168
STAB1,TRHR,TLR5	590	56	311	59	0.00108178
CNGA2,GRIK2,PCDHGB3	810	92	91	23	0.00108236
STAB1,TMEM131,NIPAL2	690	75	211	40	0.00108375
CNGA2,TMEM81,KCNH7	686	77	215	38	0.00108492
CLCN3,FZD6,TAAR2	666	72	235	43	0.00108681
TMEM67,OR8D4,TLR5	575	58	326	57	0.00108704
IGSF9B,STAB1,TMEM68	698	74	203	41	0.00108731
TMEM67,CLCN3,DCC	653	68	248	47	0.00108875
WNT5A,CNGA2,KCNV1	684	70	217	45	0.00108896
CNGA2,SCN1A,TAAR2	821	94	80	21	0.00109
TMEM67,NIPAL2,TECRL	660	70	241	45	0.00109015
TMEM67,FREM2,TAAR2	677	72	224	43	0.00109283
OR8D4,GRIK2,CLCNKB	809	92	92	23	0.00109369
TMEM67,SLC30A8,ADAM19	630	62	271	53	0.00109429
DNAJC16,GRIK2,TRPV2	801	89	100	26	0.00109451
CLCN3,TMEM81,LRRN2	658	75	243	40	0.00109558
TMEM67,FZD6,KCNH7	651	72	250	43	0.00109687
PLXNC1,SCN7A,KCNT2	820	113	81	2	0.00109948
IGSF9B,TMEM81,ABCA13	664	74	237	41	0.00110068
CNGA2,ANKRD46,ABCA13	646	67	255	48	0.00110171
TMEM67,DNAJC16,TMEM249	610	58	291	57	0.00110171
NIPAL2,TENM1,ADIPOR1	564	56	337	59	0.00110357
CNGA2,MAL2,NRXN3	652	63	249	52	0.00110374
WNT5A,OR8D4,DNAJC16	801	91	100	24	0.0011045
MAL2,TMEM81,CLCNKB	547	53	354	62	0.00110509
STAB1,TMEM81,TENM1	683	75	218	40	0.00110634
CLCNKB,TRHR,TMEM68	623	61	278	54	0.00110723
DNAJC16,ADIPOR1,KCNV1	547	53	354	62	0.00110737
SLC30A8,CLCNKB,SLC45A4	633	64	268	51	0.00111043
CNGA2,TENM1,PCDHGB3	814	92	87	23	0.00111077
STAB1,GRM8,KCNH7	817	96	84	19	0.00111145
STAB1,NIPAL2,TENM1	693	73	208	42	0.00111285
ANKRD46,ADIPOR1,TAAR2	524	53	377	62	0.00111348
SLC30A8,SCN1A,TLR5	569	54	332	61	0.00111524
MAL2,ERVMER34-1,TENM1	668	66	233	49	0.00111687
CLCNKB,TRPV2,TECRL	817	97	84	18	0.00111887
CLCN3,FZD6,PCDHGB3	662	72	239	43	0.00112359
SLC30A8,DNAJC16,PCDHGB3	653	67	248	48	0.00112366
SLC30A8,DNAJC16,TRPV2	665	67	236	48	0.00112398
SLC30A8,KCNV1,TLR5	552	52	349	63	0.00112431
STAB1,SLC30A8,OR4Q3	671	70	230	45	0.00112649
CNGA2,DNAJC16,KCNV1	676	69	225	46	0.0011268
CNGA2,TRHR,SCN1A	699	71	202	44	0.00112761
CLCN3,MAL2,GRM8	637	63	264	52	0.00112908
MAL2,GRM8,ABCA13	637	61	264	54	0.00112934
TMEM81,TRHR,TMEM68	514	48	387	67	0.00113131
CNGA2,GRM8,OR4Q3	823	94	78	21	0.00113213
CLCN3,CLCNKB,NRXN3	798	94	103	21	0.00113288
CLCN3,IGSF9B,TRHR	678	71	223	44	0.00113384
CLCN3,NIPAL2,TMEM68	620	65	281	50	0.00113419
TMEM81,SLC45A4,KCNV1	532	52	369	63	0.00113473
TMEM131,GRIK2,CLCNKB	807	96	94	19	0.00113641
DNAJC16,ANKRD46,TMEM68	610	64	291	51	0.00113652
CLCNKB,TRPV2,TAAR2	821	97	80	18	0.00113894
OR8D4,DNAJC16,KCNV1	668	68	233	47	0.00113995
TMEM81,TENM1,ABCA13	667	73	234	42	0.00114056
MAL2,ADIPOR1,KCNQ3	499	43	402	72	0.00114087
TMEM81,TMEM131,ANKRD46	540	58	361	57	0.00114168
SLC30A8,TRPV2,TLR5	566	54	335	61	0.001142
TMEM81,FZD6,ADIPOR1	535	54	366	61	0.0011445
CNGA2,TENM1,ABCA13	802	87	99	28	0.00114537
OR8D4,GRIK2,KCNH7	809	93	92	22	0.00114623
MAL2,TMEM81,ADIPOR1	513	48	388	67	0.00114717
IGSF9B,CDON,KCNH7	824	97	77	18	0.00114814
TMEM67,ANKRD46,NRXN3	636	69	265	46	0.00115044
DNAJC16,TMEM131,SCN1A	806	94	95	21	0.00115081
IGSF9B,GRIK2,SCN1A	823	93	78	22	0.00115227
CLCN3,TRPV2,TAAR2	790	92	111	23	0.00115488
TMEM67,STAB1,TLR5	578	57	323	58	0.00115494
CNGA2,TRHR,NRXN3	696	72	205	43	0.00115591
DNAJC16,TMEM131,NRXN3	803	94	98	21	0.0011571
CLCN3,CDON,FZD6	661	70	240	45	0.00115757
CLCN3,NIPAL2,TAAR2	675	72	226	43	0.00115966
CNGA2,TMEM81,NIPAL2	584	60	317	55	0.00115973
MAL2,TMEM81,TRPV2	546	52	355	63	0.00115997
TMEM131,TENM1,TECRL	806	95	95	20	0.00116051
IGSF9B,FZD6,TMEM68	621	65	280	50	0.00116176
TMEM131,CDON,KCNH7	804	95	97	20	0.00116272
TMEM67,CDON,SCN7A	671	69	230	46	0.00116274
IGSF9B,CLCNKB,TMEM68	695	75	206	40	0.00116423
TMEM131,CDON,NRXN3	806	94	95	21	0.00116485
CNGA2,MAL2,GRIK2	652	62	249	53	0.00116684
TMEM81,GRM8,CLCNKB	677	77	224	38	0.00116801
SLC30A8,OR8D4,NRXN3	664	68	237	47	0.00116826
SLC30A8,DNAJC16,CLCNKB	668	69	233	46	0.00117005
TMEM67,TMEM81,SCN7A	564	59	337	56	0.0011712
TMEM131,CLCNKB,NRXN3	816	99	85	16	0.00117271
TMEM81,GRM8,ERVMER34-1	691	79	210	36	0.00117318
SLC30A8,ADIPOR1,KCNV1	531	50	370	65	0.00117425
STAB1,DNAJC16,TMEM68	682	71	219	44	0.00117536
TMEM67,KCNH7,ABCA13	663	70	238	45	0.00117543
CNGA2,ANKRD46,NRXN3	661	71	240	44	0.00117659
TMEM81,KCNH7,TENM1	685	77	216	38	0.00117685
CNGA2,ERVMER34-1,ABCA13	821	92	80	23	0.00117723
MAL2,TENM1,SCN1A	655	63	246	52	0.00117874
PLXNC1,ADAM19,MUSK	806	108	95	7	0.00118022
STAB1,DNAJC16,TRPV2	810	92	91	23	0.00118053
IGSF9B,GRIK2,TENM1	821	93	80	22	0.00118065
CNGA2,NIPAL2,NRXN3	697	73	204	42	0.00118104
WNT5A,TMEM81,GRM8	679	78	222	37	0.00118119
TMEM67,SLC30A8,ABCA13	617	60	284	55	0.00118227
ANKRD46,ADIPOR1,ABCA13	517	52	384	63	0.00118396
TMEM67,STAB1,KCNV1	643	64	258	51	0.00118401
OR8D4,GRIK2,TECRL	805	91	96	24	0.00118437
CLCN3,KCNH7,SCN1A	798	93	103	22	0.00118657
TMEM81,CLCNKB,FZD6	568	60	333	55	0.00118741
CLCN3,TRHR,TLR5	584	56	317	59	0.00118773
PLXNC1,ADAM19,DCC	800	108	101	7	0.00118926
CNGA2,ERVMER34-1,TECRL	839	100	62	15	0.00119115
CLCN3,STAB1,ADIPOR1	654	72	247	43	0.00119287
OR8D4,ERVMER34-1,TECRL	826	97	75	18	0.00119314
MAL2,TENM1,ABCA13	641	61	260	54	0.00119495
TMEM81,TMEM131,NRXN3	679	79	222	36	0.00119534
TMEM67,TRPV2,TLR5	582	58	319	57	0.00119571
CLCN3,DNAJC16,TECRL	782	91	119	24	0.00119726
TMEM81,TMEM131,NIPAL2	575	61	326	54	0.00119811
TMEM81,TRHR,ADIPOR1	543	53	358	62	0.00119865
TMEM81,ANKRD46,ABCA13	526	55	375	60	0.00119946
CDON,GRIK2,TECRL	802	91	99	24	0.00120011
WNT5A,SLC30A8,TLR5	572	55	329	60	0.00120128
WNT5A,DNAJC16,KCNH7	807	95	94	20	0.00120216
IGSF9B,TENM1,OR4Q3	825	95	76	20	0.00120591
TMEM67,TENM1,SLC45A4	624	62	277	53	0.00120642
SLC30A8,OR4Q3,LRRN2	566	59	335	56	0.00120781
WNT5A,GRM8,TECRL	814	96	87	19	0.00120913
TRHR,ADIPOR1,LRRN2	551	55	350	60	0.00121087
WNT5A,GRIK2,OR4Q3	820	95	81	20	0.0012129
CNGA2,ABCA13,TRPV2	804	89	97	26	0.00121296
PLXNC1,ADAM19,FREM2	817	110	84	5	0.00121505
IGSF9B,MAL2,DNAJC16	650	64	251	51	0.00121569
SLC30A8,ADIPOR1,SCN1A	545	52	356	63	0.00121705
CDON,GRIK2,PCDHGB3	795	90	106	25	0.00121806
TMEM81,GRM8,NRXN3	685	78	216	37	0.00121853
IGSF9B,KCNH7,PCDHGB3	814	97	87	18	0.00122075
STAB1,GRM8,ABCA13	794	88	107	27	0.00122218
CLCN3,DNAJC16,CLCNKB	791	92	110	23	0.00122279
CLCN3,KCNV1,TLR5	571	56	330	59	0.00122405
TMEM67,CNGA2,MUSK	678	71	223	44	0.00122437
TMEM81,TRHR,TAAR2	575	58	326	57	0.0012255
CNGA2,TMEM131,NIPAL2	691	74	210	41	0.00122586
CLCN3,MAL2,CLCNKB	642	63	259	52	0.00122715
WNT5A,SLC30A8,OR4Q3	677	70	224	45	0.00122718
PLXNC1,ADAM19,SEMA3D	818	110	83	5	0.00122738
IGSF9B,TMEM68,SCN1A	698	74	203	41	0.00122878
MAL2,TMEM81,TAAR2	544	52	357	63	0.00122999
IGSF9B,SCN1A,PCDHGB3	814	94	87	21	0.00123003
STAB1,CLCNKB,ABCA13	800	90	101	25	0.00123134
GRM8,GRIK2,CLCNKB	812	93	89	22	0.001232
IGSF9B,TMEM81,SLC45A4	571	59	330	56	0.00123244
TMEM81,SLC45A4,OR4Q3	575	59	326	56	0.00123257
STAB1,OR8D4,TRHR	685	69	216	46	0.00123394
TMEM81,TMEM131,LRRN2	665	78	236	37	0.00123488
SEMA3D,TRPM1,IL2RB	815	107	86	8	0.00123507
PLXNC1,SEMA3D,IL2RB	826	112	75	3	0.00123792
TMEM81,TRHR,NRXN3	579	59	322	56	0.00123819
WNT5A,SLC30A8,DNAJC16	670	69	231	46	0.00123823
TMEM81,TMEM131,CDON	661	75	240	40	0.00123848
TMEM67,KCNT2,PCDHGB3	670	71	231	44	0.00123929
TMEM67,IGSF9B,MAL2	619	61	282	54	0.00124028
DNAJC16,TMEM131,ADIPOR1	647	71	254	44	0.00124471
TMEM67,MAL2,GRM8	618	61	283	54	0.00124527
STAB1,SLC30A8,GRM8	669	71	232	44	0.00124674
OR8D4,FZD6,TMEM68	615	63	286	52	0.00124694
SLC30A8,DNAJC16,TMEM81	552	56	349	59	0.00124774
[truncated: 17,601 more rows]
